# Supplementary material for: Mapping of Genetic Loci Conferring Resistance to Leaf Rust From Three Globally Resistant Durum Wheat Sources
Source: Front Plant Sci. 2019 Oct 8;10:1247. doi: 10.3389/fpls.2019.01247 (PMC6792298; doi:10.3389/fpls.2019.01247)
Supplement: Supplementary file 9 [file DataSheet_1.xlsx]

## Sheet: Gaza Map
	Linkage map for the Gaza/ATRED #2 population
Linkage group	Marker	Position
1A_1	BS00022677_51	0
1A_1	wsnp_Ex_c10657_17376448	0
1A_1	BobWhite_c1361_1187	0
1A_1	Tdurum_contig59794_640	0
1A_1	Tdurum_contig97729_491	0
1A_1	Tdurum_contig60323_605	0
1A_1	RAC875_c95364_259	0
1A_1	CAP11_rep_c7878_143	0
1A_1	BS00009423_51	0.4
1A_1	BS00064204_51	0.4
1A_1	BS00010488_51	0.4
1A_1	BobWhite_c31470_532	0.4
1A_1	CAP7_c6316_80	6
1A_1	Tdurum_contig46733_6628	7.3
1A_1	BS00023130_51	7.3
1A_1	CAP12_c3074_192	7.7
1A_1	TA001286-0611-w	7.7
1A_1	BS00082567_51	7.7
1A_1	Kukri_c2121_1936	21.5
1A_1	BS00003595_51	24.4
1A_1	BS00056550_51	28.2
1A_1	BS00023201_51	28.2
1A_1	D_GA8KES402HR8TV_187	28.2
1A_1	BS00079769_51	28.2
1A_1	wsnp_RFL_Contig4735_5673999	28.2
1A_1	Kukri_c46939_83	30.3
1A_1	CAP11_c852_603	30.3
1A_1	wsnp_Ra_c48124_53475145	30.3
1A_1	BS00074511_51	30.3
1A_1	RAC875_c1710_376	30.3
1A_1	BS00010128_51	30.3
1A_1	BobWhite_c39996_85	30.3
1A_1	BS00110375_51	30.3
1A_1	Tdurum_contig68827_61	30.3
1A_1	BS00022943_51	30.3
1A_1	BobWhite_c863_1064	30.3
1A_1	RAC875_rep_c105796_617	30.3
1A_1	Kukri_c54157_348	30.3
1A_1	RAC875_c75971_295	34.8
1A_1	CAP8_c2448_355	34.8
1A_1	Tdurum_contig43943_56	34.8
1A_1	RAC875_c63624_1002	34.8
1A_1	Tdurum_contig46413_779	35.2
1A_1	Tdurum_contig46413_680	35.2
1A_1	Kukri_c1977_1940	35.2
1A_1	Tdurum_contig43943_1165	35.7
1A_1	Excalibur_c9196_313	35.7
1A_1	CAP11_c2581_302	35.7
1A_1	Excalibur_c97691_225	35.7
1A_1	Tdurum_contig26035_231	37.2
1A_1	RAC875_c1852_709	39.7
1A_1	wsnp_Ex_c7252_12453079	39.7
1A_1	BobWhite_c1265_247	39.7
1A_1	BS00081682_51	39.7
1A_1	wsnp_Ex_c1137_2182795	40.1
1A_1	wsnp_JD_c7522_8606553	40.1
1A_1	Ex_c28368_426	40.1
1A_1	Excalibur_c25891_1402	40.1
1A_1	wsnp_Ex_c4876_8692783	40.1
1A_1	Excalibur_c25175_512	40.1
1A_1	Tdurum_contig42479_2158	40.1
1A_1	wsnp_Ex_c7965_13520238	40.1
1A_1	Tdurum_contig42479_1624	40.1
1A_1	Tdurum_contig42479_1254	40.1
1A_1	Kukri_c2121_1334	40.1
1A_1	Ku_c4823_673	40.1
1A_1	Excalibur_c22240_938	40.1
1A_1	Kukri_c2121_2345	40.5
1A_1	Excalibur_c58154_84	40.5
1A_1	Kukri_c964_1482	41
1A_2	Kukri_c16098_95	0
1A_2	wsnp_Ex_c10783_17554146	0
1A_2	Kukri_c7579_443	11.6
1A_2	Kukri_c7579_559	11.6
1A_2	RAC875_c10090_963	11.6
1A_2	RAC875_rep_c111911_116	11.6
1A_2	Tdurum_contig34019_260	11.6
1A_2	Tdurum_contig56382_747	11.6
1A_2	Tdurum_contig77289_179	12.5
1A_2	Tdurum_contig13946_329	12.5
1A_2	Kukri_c82555_88	12.5
1A_2	Tdurum_contig13946_241	12.5
1A_2	Tdurum_contig29280_216	12.5
1A_2	RAC875_c14066_452	12.9
1A_2	Ku_c11769_252	21
1A_2	Tdurum_contig5008_635	21
1A_2	Tdurum_contig69753_513	21
1A_2	Tdurum_contig9199_714	21
1A_2	BS00022870_51	21
1A_2	Excalibur_rep_c114535_55	21
1A_2	Kukri_c3150_341	21
1A_2	BS00013227_51	21
1A_2	Tdurum_contig97688_186	21
1A_2	Kukri_c65511_1057	21
1A_2	BS00110151_51	21
1A_2	wsnp_CAP11_c23_61357	35.5
1A_2	wsnp_Ex_c2181_4089639	35.5
1A_2	wsnp_Ex_c2181_4089788	35.5
1A_2	IAAV3306	35.9
1A_2	wsnp_Ex_c26098_35349905	36.7
1A_2	RAC875_c1080_523	37.2
1A_2	Tdurum_contig53332_743	38.4
1A_2	Kukri_c6106_470	38.4
1A_2	BobWhite_c31155_350	38.4
1A_2	D_contig09975_188	38.4
1A_2	RAC875_rep_c85118_294	38.4
1A_2	IACX7695	40.5
1A_2	wsnp_Ku_c30921_40705731	40.5
1A_2	BS00031200_51	40.5
1A_2	IAAV3552	40.5
1A_2	Kukri_c28532_103	40.5
1A_2	Ra_c2322_174	40.5
1A_2	RAC875_c41581_176	40.5
1A_2	Tdurum_contig43360_1381	40.5
1A_2	Tdurum_contig72192_260	40.5
1A_2	wsnp_Ex_c1959_3692097	40.5
1A_2	wsnp_Ex_c2178_4086161	40.5
1A_2	wsnp_RFL_Contig2808_2585736	40.5
1A_2	TA001042-0912	40.5
1A_2	Tdurum_contig43360_1592	40.5
1A_2	BS00022156_51	40.5
1A_2	IACX10924	40.5
1A_2	Ra_c2322_1067	40.5
1A_2	Tdurum_contig54929_517	41
1A_2	Tdurum_contig27881_413	41
1A_2	BobWhite_c478_1386	41
1A_2	Kukri_c609_328	41
1A_2	BS00072686_51	41
1A_2	BS00101116_51	41
1A_2	GENE-0572_334	41
1A_2	IACX542	41
1A_2	Ra_c10580_1629	41
1A_2	RAC875_c49760_107	41
1A_2	RAC875_c65515_283	41
1A_2	Tdurum_contig15970_607	41
1A_2	Tdurum_contig30751_333	41
1A_2	Tdurum_contig81558_272	41
1A_2	wsnp_BE585780A_Ta_2_2	41
1A_2	wsnp_Ex_c15188_23387754	41
1A_2	wsnp_Ku_rep_c71909_71634013	41
1A_2	Tdurum_contig81558_113	41
1A_2	GENE-0405_237	41
1A_2	Excalibur_c22728_610	42.7
1A_2	Kukri_c25839_487	42.7
1A_2	BS00064357_51	42.7
1A_2	RAC875_c43011_95	42.7
1A_2	wsnp_Ex_c44049_50205457	42.7
1A_2	wsnp_Ex_c44049_50205614	42.7
1A_2	Excalibur_c13058_241	42.7
1A_2	CAP12_c6266_187	43.5
1A_2	TA003542-0511	43.5
1A_2	wsnp_Ex_c12352_19708127	43.5
1A_2	Excalibur_c17872_137	43.5
1A_2	wsnp_Ex_c1374_2630830	43.5
1A_2	wsnp_Ex_c15383_23645972	43.5
1A_2	RAC875_c68797_400	43.5
1A_2	Kukri_rep_c106359_124	43.5
1A_2	BS00090408_51	43.5
1A_2	CAP12_c6266_298	43.5
1A_2	Ex_c5759_663	43.5
1A_2	GENE-0126_140	43.5
1A_2	IAAV5730	43.5
1A_2	Kukri_c43730_841	43.5
1A_2	RAC875_c10506_434	43.5
1A_2	RAC875_c33300_141	43.5
1A_2	RAC875_c55052_604	43.5
1A_2	RAC875_c6338_1887	43.5
1A_2	RFL_Contig921_337	43.5
1A_2	wsnp_Ex_c21592_30743513	43.5
1A_2	wsnp_Ex_c3572_6531810	43.5
1A_2	wsnp_Ex_c3572_6533892	43.5
1A_2	wsnp_Ex_c8885_14842394	43.5
1A_2	wsnp_Ku_c3844_7053669	43.5
1A_2	wsnp_Ra_rep_c74936_72685894	43.5
1A_2	CAP8_rep_c7560_159	44.4
1A_2	IACX2325	44.4
1A_2	CAP8_c2843_226	44.4
1A_2	RAC875_c38417_246	44.8
1A_2	RAC875_c8515_653	44.8
1A_2	wsnp_BF482891A_Ta_2_2	44.8
1A_2	wsnp_Ex_c2840_5247386	44.8
1A_2	Tdurum_contig10996_2485	45.2
1A_2	CAP11_c6014_160	46
1A_2	CAP8_c4897_397	46
1A_2	CAP7_c3269_236	46
1A_2	RAC875_c39125_365	46
1A_2	wsnp_Ex_c3906_7086162	46
1A_2	Excalibur_c49588_76	46
1A_2	wsnp_Ex_c41969_48673442	46
1A_2	Tdurum_contig48416_335	46.5
1A_2	wsnp_BF475149A_Ta_2_1	46.5
1A_2	wsnp_Ex_c4605_8239915	46.5
1A_2	BS00021878_51	46.5
1A_2	wsnp_Ex_c4605_8240189	46.5
1A_2	wsnp_Ex_rep_c101414_86780996	46.5
1A_2	Tdurum_contig102258_360	51.6
1A_2	D_GDS7LZN02GQ7FT_204	52.8
1A_2	Kukri_c48690_148	52.8
1A_2	Tdurum_contig81875_148	52.8
1A_2	Tdurum_contig19658_147	52.8
1A_2	Tdurum_contig49788_1162	55.4
1A_2	JD_c17158_393	59.6
1A_2	IAAV7203	60.9
1A_2	wsnp_Ex_c572_1138339	60.9
1A_2	wsnp_Ra_c2895_5488879	60.9
1A_2	Kukri_c22434_513	60.9
1A_2	Ra_c2895_591	60.9
1A_2	wsnp_Ex_c572_1138770	60.9
1A_2	BS00016654_51	63.5
1A_2	Excalibur_c59894_97	64.3
1A_2	RAC875_c86680_391	64.3
1A_2	IACX3496	69.1
1A_2	Kukri_c10453_875	69.5
1A_2	Ex_c8514_1342	69.5
1A_2	BS00040968_51	73.8
1A_2	BS00067420_51	73.8
1A_2	Kukri_c27785_400	73.8
1A_2	RAC875_c53185_802	73.8
1A_2	BS00021889_51	74.2
1A_2	Excalibur_rep_c112145_271	74.2
1A_2	Tdurum_contig31304_527	75
1A_2	BobWhite_c5356_1272	75.4
1A_2	BobWhite_rep_c63278_349	75.4
1A_2	Excalibur_c49421_443	75.4
1A_2	Excalibur_rep_c66449_1588	75.4
1A_2	RAC875_c16080_777	75.4
1A_2	wsnp_Ex_c12165_19452361	75.4
1A_2	wsnp_Ex_c34344_42677360	75.4
1A_2	wsnp_Ra_c37745_45806931	75.4
1A_2	wsnp_Ku_c24239_34199356	75.4
1A_2	RAC875_c31276_1128	75.4
1A_2	BobWhite_rep_c63819_182	75.4
1A_2	BS00002216_51	75.4
1A_2	Ex_c5192_943	75.4
1A_2	RFL_Contig3203_1971	75.4
1A_2	wsnp_Ex_c12336_19686808	75.4
1A_2	wsnp_Ex_c5192_9203100	75.4
1A_2	wsnp_Ex_c5192_9203682	75.4
1A_2	IACX4386	75.4
1A_2	BS00022698_51	75.4
1A_2	RAC875_c43643_176	75.4
1A_2	BS00021714_51	78.4
1A_2	Ra_c4159_2716	78.8
1A_2	BobWhite_c12568_900	80.2
1A_2	Excalibur_c34697_831	80.2
1A_2	Kukri_c25215_124	80.2
1A_2	wsnp_Ex_c21193_30320134	80.2
1A_2	wsnp_Ex_c21336_30465618	80.2
1A_2	IACX11338	80.6
1A_2	Ex_c16529_304	81
1A_2	Tdurum_contig11412_393	88.3
1A_2	BS00072186_51	105.5
1A_2	BS00073009_51	105.5
1A_2	BS00094553_51	123.6
1A_2	wsnp_Ra_c33025_41968284	123.6
1A_2	wsnp_Ra_c11877_19161832	123.6
1A_2	BS00065324_51	123.6
1A_2	BS00021728_51	123.6
1A_2	Tdurum_contig10572_626	124.5
1A_2	RAC875_c24047_284	124.5
1A_2	wsnp_Ra_c9209_15425473	125
1A_2	Ku_c7975_644	125
1A_2	Ra_c1311_1360	125
1A_2	Kukri_c13107_100	125
1A_2	BS00067742_51	125.5
1A_2	Kukri_c29039_315	125.5
1A_2	BS00030036_51	128.8
1A_2	CAP12_c6939_216	129.3
1A_2	BS00022220_51	129.3
1A_2	BS00022173_51	129.3
1A_2	BS00079538_51	129.3
1A_2	BS00088035_51	130.9
1A_2	BobWhite_c46007_582	130.9
1A_2	wsnp_Ex_c32590_41222878	130.9
1A_2	TA001450-1081	130.9
1A_2	Kukri_c54678_88	130.9
1A_2	Kukri_c12984_465	137.7
1A_2	RAC875_c80876_67	137.7
1A_2	CAP12_c1979_117	138.6
1A_2	BS00088136_51	138.6
1A_2	wsnp_Ku_c23012_32893918	138.6
1A_2	RAC875_c45115_509	142
1A_2	RAC875_c45115_340	142
1A_2	RAC875_c12993_201	142
1A_2	RAC875_c12993_127	142
1A_2	Kukri_c28695_269	142
1A_2	Excalibur_c65755_51	142
1A_2	Excalibur_c1845_718	142
1A_2	Excalibur_c1845_4911	142
1A_2	Kukri_c44509_515	142.8
1A_2	IAAV1142	142.8
1A_2	Kukri_c18017_1696	143.2
1A_2	Excalibur_c5033_587	143.2
1A_2	BobWhite_c12977_65	143.7
1A_2	Excalibur_c29605_535	143.7
1A_2	wsnp_Ku_c5210_9290700	150
1A_2	wsnp_Ku_c5210_9289260	150
1A_2	BobWhite_c27438_81	150
1A_2	wsnp_Ex_c5060_8985678	155.1
1A_2	Tdurum_contig79608_437	155.1
1A_2	Tdurum_contig48037_499	155.1
1A_2	Tdurum_contig48037_385	155.1
1A_2	RAC875_c31031_387	155.1
1A_2	Kukri_c10405_1277	155.1
1A_2	IAAV8743	155.1
1A_2	BS00087589_51	155.1
1A_2	BobWhite_c96_170	155.1
1A_2	wsnp_RFL_Contig1109_136771	155.1
1A_2	Tdurum_contig44112_1609	155.1
1A_2	RAC875_rep_c95460_302	155.1
1A_2	BS00028146_51	155.5
1A_2	Tdurum_contig57566_1653	155.5
1A_2	Tdurum_contig47620_592	155.5
1A_2	BS00065114_51	155.5
1A_2	BobWhite_c28971_184	155.5
1A_2	Tdurum_contig57566_827	155.5
1A_2	Tdurum_contig57566_809	155.5
1A_2	Tdurum_contig57566_1035	155.5
1A_2	Tdurum_contig29437_126	155.5
1A_2	TA005587-0433	155.5
1A_2	RAC875_c15918_407	155.5
1A_2	IACX11345	155.5
1A_2	Excalibur_c7113_2258	155.5
1A_2	Excalibur_c24356_391	155.5
1A_2	Excalibur_c14859_394	155.5
1A_2	BobWhite_c13039_184	155.5
1A_2	BS00022239_51	155.9
1A_2	Excalibur_c45861_189	156.8
1A_2	BS00081002_51	158.7
1A_2	RAC875_c6798_467	161.6
1A_2	Ex_c4060_510	161.6
1A_2	BS00110627_51	162
1A_2	BS00109991_51	162
1A_2	GENE-0262_431	162
1A_2	BobWhite_c6046_304	167.5
1A_2	RAC875_c21411_162	167.5
1A_2	wsnp_RFL_Contig3542_3718200	167.5
1A_2	wsnp_JD_c3973_5044238	167.9
1A_2	wsnp_Ex_c41953_48658353	167.9
1A_2	TA001600-1603	167.9
1A_2	IAAV544	167.9
1A_2	wsnp_Ex_c33452_41938159	168.3
1A_2	wsnp_Ex_c33452_41938013	168.3
1A_2	wsnp_BE444305A_Td_2_1	168.3
1A_2	Tdurum_contig21114_255	168.3
1A_2	IACX5994	168.3
1A_2	Excalibur_c97157_65	168.3
1A_2	Excalibur_c97157_137	168.3
1A_2	Excalibur_c22768_963	168.3
1A_2	BobWhite_c5967_537	168.3
1A_2	Ra_c110766_321	169.2
1A_2	BS00037976_51	177.8
1A_2	BS00023203_51	177.8
1A_2	BS00067119_51	186.3
1A_2	Ku_c3523_1959	186.3
1A_2	wsnp_Ex_c28149_37293117	186.3
1A_2	wsnp_Ex_c23143_32376622	191.7
1A_2	Tdurum_contig81642_298	191.7
1A_2	RFL_Contig399_976	191.7
1A_2	RFL_Contig399_1148	191.7
1A_2	RFL_Contig399_1005	191.7
1A_2	RAC875_c49433_308	191.7
1A_2	Ra_c8027_1021	191.7
1A_2	Kukri_c82086_387	191.7
1A_2	Excalibur_c21534_1436	191.7
1A_2	BS00066212_51	194.2
1A_2	Ra_c41164_730	197.5
1A_2	wsnp_JD_c20553_18260620	197.5
1A_2	Kukri_c14635_73	197.5
1A_2	JD_c20553_448	197.5
1A_2	Ra_c5683_2584	198
1A_2	JD_c285_1438	198
1A_2	Excalibur_rep_c72906_619	202.2
1A_2	Tdurum_contig11106_340	203.1
1A_2	Tdurum_contig11106_264	203.1
1A_2	RAC875_c7563_273	205.6
1A_2	RAC875_c47930_448	214.2
1A_2	wsnp_Ku_rep_c109724_94227136	232.8
1A_2	Excalibur_c1936_1072	233.6
1A_2	Kukri_c44895_88	233.6
1A_2	Kukri_c44895_139	233.6
1A_2	Ra_c364_50	236.6
1A_2	RAC875_c36980_161	237.5
1A_2	wsnp_CAP11_rep_c7847_3468669	237.5
1A_2	wsnp_Ex_c10843_17638629	237.5
1A_2	Tdurum_contig13136_605	237.5
1A_2	Kukri_c16271_544	237.5
1A_2	BobWhite_c19182_280	237.5
1A_2	BobWhite_c15256_225	237.5
1A_2	Excalibur_c23598_1502	237.9
1A_2	Tdurum_contig60210_371	239.2
1A_2	RAC875_c23586_541	239.2
1A_2	CAP12_rep_c6128_120	239.2
1A_2	Kukri_c51781_199	239.2
1A_2	CAP7_c490_123	239.6
1A_2	CAP12_c8163_118	239.6
1A_2	Tdurum_contig85466_170	239.6
1A_2	RAC875_c48804_590	239.6
1A_3	RAC875_c62550_470	0
1A_3	Kukri_c44201_497	0
1A_3	IAAV4238	0
1A_3	Tdurum_contig893_53	0.8
1A_3	IAAV618	1.7
1A_3	BS00036189_51	1.7
1A_3	BS00063847_51	3
1A_3	Ku_c32704_43	4.3
1A_3	BS00070695_51	5.1
1A_3	BobWhite_c1027_1127	5.1
1A_3	BS00035273_51	5.1
1A_3	BS00070991_51	5.1
1A_3	BS00075271_51	5.1
1A_3	Excalibur_c27376_74	5.1
1A_3	IAAV2162	5.1
1A_3	Tdurum_contig11349_810	5.6
1A_3	wsnp_Ex_rep_c67492_66096650	5.6
1A_3	RAC875_c5119_2696	5.6
1A_3	Kukri_rep_c69829_735	5.6
1A_3	Kukri_rep_c115657_255	5.6
1A_3	Kukri_c4204_1346	5.6
1A_3	Excalibur_c46365_442	5.6
1A_3	GENE-0543_113	5.6
1A_3	RAC875_c63359_1446	5.6
1A_3	BS00064087_51	5.6
1A_3	Excalibur_c12932_2102	5.6
1A_3	Excalibur_c46365_304	5.6
1A_3	Excalibur_rep_c67492_1119	5.6
1A_3	GENE-0543_1074	5.6
1A_3	GENE-0543_577	5.6
1A_3	Kukri_c4204_1673	5.6
1A_3	Kukri_c4204_1946	5.6
1A_3	Kukri_c8527_53	5.6
1A_3	wsnp_Ex_c12932_20486842	5.6
1A_3	IAAV8446	6
1A_3	RAC875_c57566_61	7.1
1A_3	Ra_c56010_289	7.1
1A_3	BS00011913_51	7.1
1A_3	RAC875_rep_c120646_120	7.1
1A_3	D_contig12592_200	7.1
1A_3	JD_c394_819	7.1
1A_3	wsnp_RFL_Contig3850_4199825	7.1
1A_3	TA003848-0787	7.1
1A_3	BS00054271_51	7.1
1A_3	IAAV3217	7.1
1A_3	IAAV4435	7.1
1A_3	wsnp_RFL_Contig3881_4265086	7.1
1A_3	BS00096930_51	7.1
1A_3	CAP11_c5573_163	7.1
1A_3	CAP7_c1295_62	7.1
1A_3	Kukri_c34242_404	7.1
1A_3	RAC875_c85550_291	7.1
1A_3	RAC875_c85550_52	7.1
1A_3	RFL_Contig4538_484	7.1
1A_3	RFL_Contig858_2219	7.1
1A_3	wsnp_Ex_c1255_2411550	7.1
1A_3	Excalibur_c12819_216	7.1
1A_3	Kukri_c21396_771	7.1
1A_3	BS00023419_51	7.1
1A_3	IAAV8607	7.1
1A_3	Tdurum_contig5560_193	7.1
1A_3	wsnp_Ex_c34694_42959047	7.1
1A_3	BS00032855_51	7.1
1A_3	Excalibur_c17004_1396	7.1
1A_3	Excalibur_rep_c71271_247	7.1
1A_3	RAC875_rep_c78831_168	7.1
1A_3	Tdurum_contig47006_1105	7.1
1A_3	Tdurum_contig47006_2711	7.1
1A_3	tplb0059i08_441	7.1
1A_3	wsnp_Ex_c2918_5381441	7.1
1B_1	Tdurum_contig55639_241	0
1B_1	IAAV2838	0
1B_1	BS00012068_51	0
1B_1	Tdurum_contig83093_132	2.6
1B_1	Kukri_c33670_506	3
1B_1	BS00009699_51	3
1B_1	Tdurum_contig9874_451	3
1B_1	BS00067169_51	3
1B_1	Tdurum_contig11293_583	3
1B_1	BS00029146_51	3
1B_1	Tdurum_contig9874_391	3
1B_1	GENE-0293_445	3
1B_1	BS00063263_51	3
1B_1	IACX7409	3
1B_1	D_GA8KES402HUUGV_172	22.9
1B_1	Tdurum_contig50667_671	24.1
1B_1	Tdurum_contig50667_409	24.1
1B_1	Tdurum_contig50667_306	24.1
1B_1	BS00066682_51	25
1B_1	BobWhite_c14271_1379	25
1B_1	RAC875_c34173_198	25
1B_1	Excalibur_c16851_835	29.2
1B_1	Kukri_c34536_259	34.7
1B_1	wsnp_Ku_c28164_38103270	34.7
1B_1	wsnp_Ex_rep_c67198_65702998	34.7
1B_1	Tdurum_contig76266_399	34.7
1B_1	Tdurum_contig76266_221	34.7
1B_1	Tdurum_contig44219_318	34.7
1B_1	Tdurum_contig44219_165	34.7
1B_1	RAC875_rep_c70613_78	34.7
1B_1	Kukri_rep_c106603_618	34.7
1B_1	Tdurum_contig76266_342	34.7
1B_1	Tdurum_contig76266_846	34.7
1B_1	Ex_c67198_1838	34.7
1B_1	Excalibur_rep_c67198_530	34.7
1B_1	TA005766-0499	34.7
1B_1	BobWhite_c28295_256	34.7
1B_1	wsnp_Ex_c1493_2862065	34.7
1B_1	BS00062726_51	35.2
1B_1	BS00029539_51	35.2
1B_1	Excalibur_c27135_1212	36.7
1B_1	wsnp_Ku_rep_c103074_89905152	36.7
1B_1	wsnp_Ku_c13229_21142792	36.7
1B_1	wsnp_Ex_c50340_54659660	36.7
1B_1	BS00110900_51	36.7
1B_1	Kukri_c29655_194	36.7
1B_1	IAAV8085	36.7
1B_1	Tdurum_contig68637_256	36.7
1B_1	Kukri_c87556_380	36.7
1B_1	IACX3811	36.7
1B_1	Tdurum_contig62624_190	36.7
1B_1	Tdurum_contig14847_144	36.7
1B_1	RAC875_c63624_753	36.7
1B_1	Ra_c69552_1419	36.7
1B_1	Ku_c1312_1194	36.7
1B_1	GENE-0019_1155	36.7
1B_1	Excalibur_c46114_572	36.7
1B_1	D_GB5Y7FA01BMOJY_241	36.7
1B_1	BS00011608_51	36.7
1B_1	BS00004903_51	36.7
1B_1	TA004380-0460	36.7
1B_1	wsnp_BF473056D_Ta_2_1	60
1B_1	Tdurum_contig9762_314	60
1B_1	Tdurum_contig78972_316	60
1B_1	Tdurum_contig61410_542	60
1B_1	Tdurum_contig61410_467	60
1B_1	Tdurum_contig61324_473	60
1B_1	Tdurum_contig61324_305	60
1B_1	Tdurum_contig56188_569	60
1B_1	Tdurum_contig17609_117	60
1B_1	TA003247-1072	60
1B_1	RFL_Contig4104_3352	60
1B_1	RFL_Contig2160_617	60
1B_1	RAC875_c41114_486	60
1B_1	Kukri_c8211_401	60
1B_1	IAAV7541	60
1B_1	GENE-0689_791	60
1B_1	Excalibur_c95656_129	60
1B_1	D_contig25392_201	60
1B_1	BS00105846_51	60
1B_1	BS00087787_51	60
1B_1	BS00081195_51	60
1B_1	Kukri_c60285_505	60
1B_1	Tdurum_contig98378_452	60
1B_1	Tdurum_contig56148_382	60
1B_1	IACX502	60
1B_1	BS00029345_51	69.4
1B_1	Kukri_c51268_248	74.2
1B_1	Tdurum_contig97143_402	77.4
1B_1	Ex_c3265_2068	81.6
1B_1	RAC875_c30381_573	84.6
1B_1	Kukri_c78742_146	86.3
1B_1	BobWhite_rep_c66146_237	86.3
1B_1	Kukri_c78742_122	86.3
1B_1	Kukri_c100591_224	87.5
1B_1	Tdurum_contig31624_230	87.5
1B_1	Kukri_c10308_342	87.5
1B_1	Excalibur_c40240_78	88
1B_1	GENE-0173_309	88
1B_1	Ra_c1195_200	88
1B_1	wsnp_Ex_rep_c69266_68192766	88
1B_1	RAC875_c50365_521	88
1B_1	RAC875_c21131_3615	88
1B_1	TA001643-0728	88
1B_1	Kukri_c21709_185	88
1B_1	Kukri_c11580_818	88
1B_1	BS00038778_51	88
1B_1	wsnp_BE497109B_Ta_2_5	88
1B_1	TA004184-0525	88
1B_1	tplb0024i16_800	88
1B_1	tplb0024i16_1177	88
1B_1	Tdurum_contig7497_570	88
1B_1	Tdurum_contig63991_404	88
1B_1	Tdurum_contig63991_280	88
1B_1	Tdurum_contig63991_186	88
1B_1	Tdurum_contig60809_268	88
1B_1	Tdurum_contig60809_255	88
1B_1	Tdurum_contig60547_330	88
1B_1	Tdurum_contig60547_129	88
1B_1	Tdurum_contig43346_108	88
1B_1	Tdurum_contig42289_936	88
1B_1	Tdurum_contig42289_1857	88
1B_1	Tdurum_contig288_253	88
1B_1	Tdurum_contig13391_680	88
1B_1	RAC875_rep_c117617_183	88
1B_1	RAC875_rep_c110216_250	88
1B_1	Kukri_c13156_129	88
1B_1	JD_c2834_381	88
1B_1	IAAV8661	88
1B_1	IAAV5269	88
1B_1	GENE-0173_168	88
1B_1	Excalibur_c20228_135	88
1B_1	Ku_c28949_178	93.1
1B_1	Excalibur_c55805_316	93.1
1B_1	RAC875_c44575_396	94.4
1B_1	BS00022670_51	94.4
1B_1	wsnp_Ku_c30982_40765341	94.4
1B_1	RAC875_c50514_88	94.4
1B_1	Kukri_c30982_1173	94.4
1B_1	Kukri_c28541_635	94.4
1B_1	IACX1008	94.4
1B_1	IAAV2546	94.4
1B_1	BS00053348_51	94.4
1B_1	RAC875_c42206_305	94.8
1B_1	wsnp_Ku_c3710_6836438	94.8
1B_1	CAP7_c12317_245	96.1
1B_1	Tdurum_contig33207_282	96.5
1B_1	TA004947-0758	96.5
1B_1	BS00041968_51	96.5
1B_1	IAAV1158	97.8
1B_1	Tdurum_contig61425_242	97.8
1B_1	BS00064438_51	97.8
1B_1	Kukri_rep_c95031_104	97.8
1B_1	Tdurum_contig81435_288	97.8
1B_1	BS00022490_51	97.8
1B_1	BS00011465_51	97.8
1B_1	Tdurum_contig69821_141	97.8
1B_1	Tdurum_contig6949_697	97.8
1B_1	Tdurum_contig51348_326	97.8
1B_1	RAC875_c21842_1647	97.8
1B_1	Tdurum_contig42182_6396	98.6
1B_1	BS00041010_51	98.6
1B_1	Ku_c8767_1245	98.6
1B_1	wsnp_Ku_c66585_65967792	98.6
1B_1	wsnp_Ex_c10233_16784994	98.6
1B_1	Tdurum_contig65023_587	98.6
1B_1	Kukri_rep_c88171_730	98.6
1B_1	Ra_c33845_794	98.6
1B_1	JD_c10376_670	98.6
1B_1	Tdurum_contig11877_414	98.6
1B_1	wsnp_Ex_c6022_10552811	98.6
1B_1	Tdurum_contig47456_430	98.6
1B_1	RAC875_rep_c108085_570	98.6
1B_1	GENE-0116_102	98.6
1B_1	Excalibur_c3140_697	98.6
1B_1	CAP7_rep_c7114_55	98.6
1B_1	wsnp_Ex_rep_c68573_67416138	98.6
1B_1	wsnp_Ex_c30805_39678077	98.6
1B_1	wsnp_Ex_c15934_24341135	98.6
1B_1	Tdurum_contig84184_124	98.6
1B_1	Tdurum_contig53888_350	98.6
1B_1	Tdurum_contig53888_107	98.6
1B_1	Tdurum_contig47456_182	98.6
1B_1	Tdurum_contig11877_785	98.6
1B_1	Tdurum_contig11877_429	98.6
1B_1	RAC875_c24109_600	98.6
1B_1	Kukri_rep_c70738_896	98.6
1B_1	Kukri_c8308_245	98.6
1B_1	Kukri_c2297_181	98.6
1B_1	GENE-1214_159	98.6
1B_1	BS00009731_51	98.6
1B_1	BS00003600_51	98.6
1B_1	Kukri_c10593_1064	98.6
1B_1	wsnp_be443797B_Ta_2_1	98.6
1B_1	RAC875_c5227_1385	98.6
1B_1	Tdurum_contig76507_422	98.6
1B_1	Tdurum_contig46780_203	99
1B_1	Tdurum_contig42856_1271	99
1B_1	Tdurum_contig20752_248	99
1B_1	Tdurum_contig25337_77	99
1B_1	Tdurum_contig10326_151	99.5
1B_1	RAC875_c2331_2570	99.5
1B_1	Kukri_c62285_336	99.5
1B_1	RAC875_c39721_709	99.9
1B_1	Kukri_rep_c108436_534	99.9
1B_1	Excalibur_c39191_82	99.9
1B_1	BS00062740_51	99.9
1B_1	Tdurum_contig57247_482	101.6
1B_1	RAC875_c22350_1108	101.6
1B_1	BS00021947_51	104.1
1B_1	RAC875_c59340_185	104.1
1B_1	Ku_c12671_120	105
1B_1	Ku_c13515_171	105
1B_1	Tdurum_contig87816_268	106.2
1B_1	BS00094498_51	106.2
1B_1	Tdurum_contig10955_429	106.2
1B_1	Tdurum_contig28899_127	107.5
1B_1	IAAV1714	107.5
1B_1	BS00060270_51	107.5
1B_1	BS00022581_51	107.5
1B_1	Kukri_c13968_1342	107.5
1B_1	BobWhite_c11460_291	107.5
1B_1	Excalibur_c57972_116	107.5
1B_1	GENE-0283_96	107.9
1B_1	Tdurum_contig49660_719	107.9
1B_1	GENE-0045_73	107.9
1B_1	Tdurum_contig70555_81	107.9
1B_1	wsnp_BE591501B_Ta_2_1	107.9
1B_1	RAC875_c61851_238	107.9
1B_1	Tdurum_contig11087_181	107.9
1B_1	Kukri_c20927_339	107.9
1B_1	BS00110149_51	107.9
1B_1	Tdurum_contig61854_831	107.9
1B_1	Tdurum_contig25434_218	108.4
1B_1	Tdurum_contig25434_209	108.4
1B_1	RAC875_c24337_1280	108.4
1B_1	BS00076696_51	108.4
1B_1	Kukri_c12151_769	108.4
1B_1	Kukri_c12151_467	108.4
1B_1	BS00071083_51	108.4
1B_1	GENE-3085_533	108.4
1B_1	Tdurum_contig82366_354	108.4
1B_1	Tdurum_contig77676_464	108.4
1B_1	Tdurum_contig57731_412	108.4
1B_1	Tdurum_contig57731_225	108.4
1B_1	Tdurum_contig57731_162	108.4
1B_1	Tdurum_contig42129_1454	108.4
1B_1	Tdurum_contig32033_334	108.4
1B_1	Tdurum_contig32033_125	108.4
1B_1	Tdurum_contig29676_141	108.4
1B_1	Tdurum_contig29228_114	108.4
1B_1	IACX5814	108.4
1B_1	BS00038928_51	108.4
1B_1	Tdurum_contig23640_281	108.8
1B_1	Tdurum_contig28305_106	109.6
1B_1	BS00110480_51	110.1
1B_1	Tdurum_contig62113_343	110.1
1B_1	Tdurum_contig57700_204	110.1
1B_1	BS00011390_51	110.1
1B_1	Tdurum_contig7109_954	110.5
1B_1	IACX5764	110.5
1B_1	Tdurum_contig15660_376	111.3
1B_1	Tdurum_contig48063_1879	111.3
1B_1	Tdurum_contig12701_490	111.8
1B_1	Tdurum_contig48171_189	112.2
1B_1	Tdurum_contig70846_226	112.2
1B_1	BS00108497_51	112.2
1B_1	BS00022324_51	112.2
1B_1	TA006157-0542	112.2
1B_1	Tdurum_contig45357_821	113.5
1B_1	Tdurum_contig28668_124	113.5
1B_1	wsnp_JD_c4485_5618761	114.4
1B_1	wsnp_Ex_c17452_26163465	114.4
1B_1	tplb0023b14_704	114.4
1B_1	BS00073132_51	114.4
1B_1	wsnp_Ku_c4951_8856170	114.4
1B_1	wsnp_Ex_rep_c67036_65492436	114.4
1B_1	wsnp_Ra_c8484_14372772	114.4
1B_1	Tdurum_contig20191_171	119.1
1B_1	wsnp_Ra_c23758_33291657	119.1
1B_1	Kukri_c51474_334	119.1
1B_1	wsnp_Ex_c3681_6715277	119.1
1B_1	wsnp_Ra_c2027_3945764	119.1
1B_1	wsnp_Ra_c2027_3945713	119.1
1B_1	wsnp_Ra_c2027_3943938	119.1
1B_1	wsnp_Ex_c3681_6716255	119.1
1B_1	wsnp_Ex_c2025_3799847	119.1
1B_1	wsnp_CAP7_c940_480745	119.1
1B_1	RAC875_s105188_92	119.1
1B_1	IAAV5704	119.1
1B_1	Ra_c3083_982	119.1
1B_1	wsnp_Ex_c34966_43196962	119.1
1B_1	wsnp_Ex_rep_c68712_67571580	119.1
1B_1	BobWhite_rep_c66032_270	119.5
1B_1	wsnp_BE443332B_Ta_2_2	119.5
1B_1	Tdurum_contig56874_562	122.5
1B_1	wsnp_Ku_c20139_29729256	122.9
1B_1	Kukri_c667_1073	122.9
1B_1	wsnp_Ku_c24323_34285350	122.9
1B_1	Tdurum_contig60052_184	122.9
1B_1	Ra_c26829_375	122.9
1B_1	Kukri_c67707_114	122.9
1B_1	Excalibur_rep_c105376_485	122.9
1B_1	TA001197-0204	122.9
1B_1	Excalibur_c50665_1323	122.9
1B_1	wsnp_BE446240B_Ta_2_1	122.9
1B_1	Tdurum_contig15593_407	122.9
1B_1	Tdurum_contig28316_243	122.9
1B_1	wsnp_BE446240B_Ta_2_3	122.9
1B_1	Tdurum_contig56873_1237	122.9
1B_1	Tdurum_contig44255_814	122.9
1B_1	RAC875_c56417_377	122.9
1B_1	GENE-0142_178	122.9
1B_1	CAP7_c3456_113	122.9
1B_1	BS00071465_51	122.9
1B_1	BS00023142_51	122.9
1B_1	Tdurum_contig28316_228	122.9
1B_1	BS00067146_51	123.9
1B_1	RAC875_c87890_234	126.6
1B_1	Tdurum_contig59449_400	126.6
1B_1	Tdurum_contig59449_1462	126.6
1B_1	Kukri_c7905_226	142.9
1B_1	wsnp_Ra_c19148_28288923	142.9
1B_1	Tdurum_contig60509_232	142.9
1B_1	wsnp_Ex_c5679_9976893	142.9
1B_1	Kukri_c13188_256	142.9
1B_2	wsnp_Ex_c5098_9047611	0
1B_2	wsnp_JD_c6331_7499499	0
1B_2	Kukri_c53642_89	0
1B_2	Kukri_c22352_270	0.8
1B_2	GENE-0120_397	1.3
1B_2	RAC875_c95548_156	1.7
1B_2	IACX9308	2.1
1B_2	BS00010625_51	2.1
1B_2	Tdurum_contig42755_1086	2.5
1B_2	Kukri_rep_c111991_498	2.5
1B_2	BobWhite_c48550_198	2.5
1B_2	BS00082521_51	3.4
1B_2	wsnp_Ex_rep_c101231_86636951	3.4
1B_2	Tdurum_contig65046_52	4.3
1B_2	Excalibur_c24663_1042	4.3
1B_2	tplb0059m08_557	6
1B_2	GENE-0072_33	6
1B_2	wsnp_Ex_c22439_31632880	13.3
1B_2	Excalibur_c60931_1260	13.3
1B_2	BS00063092_51	13.3
1B_2	BobWhite_c13874_167	13.3
1B_2	Excalibur_c12994_1060	13.7
1B_2	Ku_c106533_550	13.7
1B_2	BS00076405_51	13.7
1B_2	RAC875_c45678_1083	15.8
1B_2	Tdurum_contig57101_936	15.8
1B_2	Tdurum_contig57101_742	15.8
1B_2	Tdurum_contig57101_505	15.8
1B_2	Tdurum_contig57101_2158	15.8
1B_2	Tdurum_contig57101_1349	15.8
1B_2	Tdurum_contig57101_1235	15.8
1B_2	Tdurum_contig57101_1160	15.8
1B_2	BS00066071_51	15.8
1B_2	Excalibur_c14911_466	15.8
1B_2	RAC875_c55891_659	15.8
1B_2	BS00039740_51	16.2
1B_2	Tdurum_contig47550_699	17.5
1B_2	Kukri_c7770_176	17.5
1B_2	BS00022551_51	33.4
1B_2	RAC875_c1136_867	36.4
1B_2	wsnp_Ex_rep_c67299_65845319	36.4
1B_2	TA005251-0278	36.4
1B_2	BS00026338_51	36.4
1B_2	BS00100853_51	36.4
1B_2	BS00066944_51	36.4
1B_2	wsnp_Ex_rep_c67299_65844168	36.4
1B_2	RAC875_c60269_205	40.2
1B_2	RAC875_c31133_198	40.2
1B_2	RAC875_c32848_578	40.7
1B_2	wsnp_Ex_rep_c71376_70138381	42.3
1B_2	BobWhite_c39656_106	42.3
1B_2	BS00010148_51	42.3
1B_2	BS00042244_51	42.3
1B_2	Kukri_rep_c112383_588	42.3
1B_2	wsnp_Ex_c6378_11086366	42.3
1B_2	Ku_c9909_1766	43.2
1B_2	Ku_c7195_2622	44.9
1B_2	BS00023071_51	45.3
1B_2	RAC875_c39401_277	45.3
1B_2	RAC875_c39401_229	45.3
1B_2	RAC875_c39401_502	45.3
1B_2	RAC875_c100059_123	45.7
1B_2	Tdurum_contig83079_133	45.7
1B_2	CAP7_c1137_53	45.7
1B_2	GENE-3046_367	45.7
1B_2	Tdurum_contig27860_478	45.7
1B_2	Kukri_c8061_98	46.2
1B_2	Excalibur_rep_c107047_605	46.6
1B_2	Excalibur_rep_c107047_679	46.6
1B_2	RAC875_c16753_1063	46.6
1B_2	Tdurum_contig96049_200	46.6
1B_2	Excalibur_rep_c107047_469	46.6
1B_2	BS00064162_51	46.6
1B_2	Kukri_c13978_132	46.6
1B_2	RAC875_c52957_154	46.6
1B_2	RFL_Contig2176_1111	46.6
1B_2	RFL_Contig2176_1163	46.6
1B_2	Tdurum_contig85180_99	46.6
1B_2	Excalibur_c44818_109	46.6
1B_2	RAC875_c61512_173	48.7
1B_2	Tdurum_contig10362_328	50.4
1B_2	IACX8280	51.3
1B_2	BobWhite_c48071_144	51.3
1B_2	Kukri_c19247_53	51.3
1B_2	Kukri_c19247_711	51.3
1B_2	wsnp_Ku_c56140_59771244	52.1
1B_2	CAP12_rep_c5516_342	52.5
1B_2	BS00108257_51	52.5
1B_2	wsnp_BE494527B_Ta_2_1	53
1B_2	BS00067436_51	54.2
1B_2	BobWhite_c42716_71	54.2
1B_2	BobWhite_c8016_301	54.2
1B_2	BS00083060_51	54.2
1B_2	BS00110231_51	54.2
1B_2	Excalibur_c40808_441	54.2
1B_2	Excalibur_rep_c96924_118	54.2
1B_2	RAC875_c47427_75	54.2
1B_2	RAC875_c47741_227	54.2
1B_2	RFL_Contig5937_1677	54.2
1B_2	wsnp_Ex_rep_c66255_64400455	54.2
1B_2	Excalibur_rep_c72368_68	54.2
1B_2	BS00081749_51	54.2
1B_2	RAC875_c47427_235	54.2
1B_2	BS00022411_51	67.7
1B_2	Tdurum_contig57927_171	67.7
1B_2	Tdurum_contig57927_460	67.7
1B_2	D_GCE8AKX02JET0R_153	80.6
1B_2	Kukri_c44191_452	80.6
1B_2	BS00107675_51	80.6
1B_2	BS00022176_51	80.6
1B_2	Tdurum_contig50988_500	105.4
1B_2	RFL_Contig1823_1044	105.8
1B_2	Tdurum_contig11216_942	105.8
1B_2	BS00099794_51	105.8
1B_2	BS00109244_51	105.8
1B_2	Excalibur_c8585_701	105.8
1B_2	BobWhite_c23617_167	105.8
1B_2	Tdurum_contig30664_181	105.8
1B_2	Jagger_c3757_131	105.8
1B_2	Excalibur_c8585_561	105.8
1B_2	GENE-0129_214	128.6
1B_2	RAC875_rep_c111494_195	128.6
1B_2	GENE-0129_110	128.6
1B_2	GENE-0163_949	128.6
1B_2	BobWhite_c39901_338	128.6
1B_2	BobWhite_c44460_821	128.6
1B_2	BS00079088_51	128.6
1B_2	TA004059-0492	128.6
1B_2	RAC875_c49225_66	129.1
1B_2	Kukri_c36758_140	129.1
1B_2	GENE-0208_688	129.5
1B_2	GENE-0208_695	129.5
1B_2	RAC875_c23586_493	129.5
1B_2	Excalibur_c22205_573	130
1B_2	Tdurum_contig68980_448	130
1B_2	Tdurum_contig57153_1356	130.4
1B_2	IACX8074	134.6
1B_2	BS00078414_51	134.6
1B_2	GENE-0416_480	134.6
1B_2	IACX9290	134.6
1B_2	Tdurum_contig75589_317	134.6
1B_2	RAC875_c20798_336	135
1B_2	Kukri_rep_c102001_59	135.9
1B_2	Excalibur_rep_c71107_517	136.3
1B_2	Kukri_rep_c101649_404	136.3
1B_2	Kukri_c18230_1633	136.7
1B_2	IAAV5949	136.7
1B_2	BS00000010_51	160.8
1B_2	BS00084990_51	165.4
1B_2	IACX17310	165.4
1B_2	Excalibur_c11190_617	165.4
1B_2	Kukri_c376_3063	165.4
1B_2	Tdurum_contig46647_623	165.4
1B_2	Tdurum_contig62905_165	165.4
1B_2	BobWhite_c16824_151	165.9
1B_2	BS00103710_51	165.9
1B_2	BS00107837_51	165.9
1B_2	CAP7_c1788_66	165.9
1B_2	IAAV6011	165.9
1B_2	Kukri_c44604_203	165.9
1B_2	Kukri_c5873_645	165.9
1B_2	TA002645-0060	165.9
1B_2	Tdurum_contig42558_134	165.9
1B_2	Tdurum_contig52086_524	171.8
1B_2	RAC875_c76714_77	171.8
1B_2	BobWhite_c20073_382	171.8
1B_2	RAC875_c11599_494	171.8
1B_2	Tdurum_contig52086_129	171.8
1B_2	RAC875_c20475_474	171.8
1B_2	BobWhite_c12960_168	171.8
1B_2	CAP11_c7969_315	171.8
1B_2	Tdurum_contig52086_342	171.8
1B_2	tplb0049h18_765	171.8
1B_2	BS00063302_51	171.8
1B_2	Excalibur_c62486_205	171.8
1B_2	Tdurum_contig52086_264	171.8
1B_2	RAC875_rep_c105597_205	171.8
1B_2	wsnp_Ex_c1058_2020681	171.8
1B_2	wsnp_Ku_c2797_5284087	171.8
1B_2	D_contig03023_692	172.2
1B_2	Excalibur_c35289_64	172.2
1B_2	BS00063686_51	172.2
1B_2	Excalibur_c39284_949	173.1
1B_2	Excalibur_c5888_169	173.1
1B_2	Kukri_c59535_186	173.1
1B_2	Tdurum_contig13879_352	173.1
1B_2	wsnp_Ex_c649_1279852	173.1
1B_2	Excalibur_c5888_641	173.1
1B_2	Tdurum_contig13879_429	173.1
1B_2	BobWhite_c11949_788	173.1
1B_2	Tdurum_contig45965_563	173.1
1B_2	Kukri_c59535_393	173.1
1B_2	IACX9428	178.1
1B_2	Tdurum_contig44851_987	178.1
1B_2	Tdurum_contig44851_927	178.1
1B_2	Excalibur_c35345_476	178.1
1B_2	Tdurum_contig44851_888	178.1
1B_2	Excalibur_rep_c69522_83	178.6
1B_2	BS00064948_51	178.6
1B_2	BS00082577_51	178.6
1B_2	Ex_c6112_1248	178.6
1B_2	Kukri_rep_c110309_69	178.6
1B_2	Kukri_rep_c111174_132	178.6
1B_2	RAC875_rep_c111730_97	178.6
1B_2	Tdurum_contig49509_456	178.6
1B_2	wsnp_Ex_c955_1827567	178.6
1B_2	Excalibur_rep_c102616_317	178.6
1B_2	Kukri_rep_c110309_129	178.6
1B_2	Ku_c11537_539	178.6
1B_2	Tdurum_contig80264_1014	178.6
2A_1	BS00105593_51	0
2A_1	TA002254-0660	8.6
2A_1	Excalibur_c7682_652	9
2A_1	Kukri_c46542_1015	11.5
2A_1	Tdurum_contig8121_132	11.5
2A_1	RAC875_c63018_441	11.5
2A_1	Kukri_c31776_1621	11.5
2A_1	tplb0032i02_1388	11.5
2A_1	Excalibur_c25599_358	11.5
2A_1	Excalibur_c18324_297	11.5
2A_1	TA002014-1062	12
2A_1	Kukri_c54013_632	12
2A_1	Excalibur_c39189_510	12
2A_1	Excalibur_s113791_202	12
2A_1	Excalibur_c9656_170	12
2A_1	TA002014-0997	12
2A_1	Excalibur_c17946_237	12.4
2A_1	BobWhite_c10673_138	12.8
2A_1	BobWhite_c10673_330	12.8
2A_1	IAAV8167	12.8
2A_1	RAC875_c2300_1021	13.2
2A_1	Tdurum_contig48009_99	15.4
2A_1	Tdurum_contig81115_133	17.6
2A_1	Kukri_c36139_292	17.6
2A_1	Tdurum_contig69643_287	17.6
2A_1	Tdurum_contig15438_231	23.1
2A_1	BobWhite_c2512_1588	23.1
2A_1	Tdurum_contig63516_497	23.6
2A_1	RAC875_c829_611	23.6
2A_1	Tdurum_contig63516_381	23.6
2A_1	Kukri_c11809_824	23.6
2A_1	Kukri_c102346_668	23.6
2A_1	RAC875_c47161_142	23.6
2A_1	Tdurum_contig28712_190	24.8
2A_1	wsnp_RFL_Contig3790_4082085	26.1
2A_1	Kukri_c833_345	27.8
2A_1	RAC875_c48891_476	56.7
2A_1	Tdurum_contig67879_504	56.7
2A_1	JD_c11825_1135	57.2
2A_1	RAC875_c25513_403	57.2
2A_1	Tdurum_contig14482_1013	57.2
2A_1	Excalibur_c7971_1573	57.2
2A_1	Excalibur_c9472_217	57.2
2A_1	Tdurum_contig67827_89	57.2
2A_1	RFL_Contig4567_218	57.2
2A_2	Tdurum_contig32692_271	0
2A_2	Ku_c8180_291	3
2A_2	Kukri_c8180_193	3
2A_2	Tdurum_contig12952_263	8.1
2A_2	Tdurum_contig12952_114	8.1
2A_2	BS00064905_51	11.6
2A_2	Tdurum_contig42283_347	11.6
2A_2	Tdurum_contig46797_585	11.6
2A_2	Tdurum_contig736_373	11.6
2A_2	Tdurum_contig11623_679	11.6
2A_2	IAAV2654	11.6
2A_2	RAC875_c10616_199	12.4
2A_2	Tdurum_contig28056_102	14.1
2A_2	TA004293-0913	14.1
2A_2	Tdurum_contig61315_104	32.7
2A_2	Ra_c37244_428	35.2
2A_2	BS00083146_51	36.2
2A_2	wsnp_Ex_c22645_31845564	36.2
2A_2	wsnp_RFL_Contig3085_3007861	36.2
2A_2	wsnp_Ex_c22645_31845530	36.2
2A_2	wsnp_Ex_c15822_24204224	36.2
2A_2	Tdurum_contig47258_1039	36.6
2A_2	BobWhite_c9564_587	37.9
2A_2	TA004602-1630	37.9
2A_2	wsnp_Ku_c15567_24223777	37.9
2A_2	Excalibur_rep_c103108_709	37.9
2A_2	wsnp_Ku_c15567_24224486	37.9
2A_2	RAC875_c12221_367	37.9
2A_2	RAC875_c65419_206	38.3
2A_2	RAC875_rep_c80737_162	44.7
2A_2	Excalibur_c11947_746	45.9
2A_2	RAC875_c34757_180	46.4
2A_2	Kukri_rep_c73477_888	48.9
2A_2	Tdurum_contig560_239	48.9
2A_2	Tdurum_contig560_297	48.9
2A_2	wsnp_Ex_c2887_5330426	48.9
2A_2	wsnp_Ex_c2887_5330787	48.9
2A_2	wsnp_JD_c18695_17091254	48.9
2A_2	BS00039209_51	52.3
2A_2	Tdurum_contig44400_1556	52.3
2A_2	Tdurum_contig44400_1610	52.3
2A_2	Tdurum_contig70306_425	52.3
2A_2	Tdurum_contig9731_121	52.3
2A_2	Tdurum_contig9731_62	52.3
2A_2	BS00055933_51	52.7
2A_2	Excalibur_c15733_252	52.7
2A_2	Excalibur_rep_c111743_194	52.7
2A_2	GENE-1365_255	52.7
2A_2	Kukri_c47534_1509	52.7
2A_2	RAC875_c13116_541	52.7
2A_2	RAC875_c20700_853	52.7
2A_2	RAC875_c27556_226	52.7
2A_2	TA005222-0574	52.7
2A_2	Tdurum_contig48302_532	52.7
2A_2	Tdurum_contig5311_112	52.7
2A_2	Tdurum_contig5311_67	52.7
2A_2	Tdurum_contig82812_213	52.7
2A_2	BS00066978_51	52.7
2A_2	Tdurum_contig48302_539	52.7
2A_2	Excalibur_c3108_5476	52.7
2A_2	Tdurum_contig97684_237	52.7
2A_2	RAC875_c13116_116	52.7
2A_2	RAC875_c13116_943	52.7
2A_2	IAAV733	53.6
2A_2	RAC875_rep_c70093_1079	53.6
2A_2	Tdurum_contig9070_142	53.6
2A_2	wsnp_BE497494A_Td_2_1	53.6
2A_2	wsnp_BE497494A_Td_2_2	53.6
2A_2	wsnp_CAP11_rep_c8768_3788007	53.6
2A_2	wsnp_CAP12_c901_472535	53.6
2A_2	wsnp_Ex_c15325_23565794	53.6
2A_2	wsnp_JD_c12088_12411845	53.6
2A_2	Kukri_c40035_258	56.1
2A_2	Kukri_c24852_466	56.6
2A_2	RAC875_c24517_558	56.6
2A_2	Kukri_rep_c90581_382	56.6
2A_2	BS00021739_51	57.4
2A_2	BS00079443_51	57.4
2A_2	RAC875_rep_c73925_276	57.4
2A_2	Excalibur_c44080_386	59.5
2A_2	Excalibur_c12169_904	60
2A_2	IAAV263	78.6
2A_2	JD_c2020_434	78.6
2A_2	Kukri_c44442_274	79
2A_2	Kukri_c441_891	79.9
2A_2	Tdurum_contig31600_293	82.4
2A_2	Kukri_c92410_451	86.7
2A_2	Tdurum_contig10385_477	95.3
2A_2	BS00056232_51	96.6
2A_2	Tdurum_contig44687_464	97.1
2A_2	Tdurum_contig41899_1035	97.1
2A_2	Kukri_c93735_119	97.1
2A_2	wsnp_Ku_c30418_40245121	97.1
2A_2	wsnp_Ex_rep_c66709_65042923	97.1
2A_2	wsnp_Ex_c21786_30948397	97.1
2A_2	wsnp_Ex_c2138_4015881	97.1
2A_2	wsnp_CAP12_rep_c4379_1995966	97.1
2A_2	wsnp_CAP11_rep_c8681_3747503	97.1
2A_2	Tdurum_contig4781_1198	97.1
2A_2	Tdurum_contig10910_713	97.1
2A_2	TA001801-0524	97.1
2A_2	Ra_c8300_516	97.1
2A_2	Ra_c24215_770	97.1
2A_2	Kukri_c61942_61	97.1
2A_2	Kukri_c2949_1657	97.1
2A_2	Ku_c6019_806	97.1
2A_2	IAAV359	97.1
2A_2	GENE-0976_223	97.1
2A_2	Excalibur_rep_c67434_73	97.1
2A_2	Excalibur_rep_c102039_1008	97.1
2A_2	Ex_c24398_831	97.1
2A_2	BS00066748_51	97.1
2A_2	BS00063599_51	97.1
2A_2	BS00039797_51	97.1
2A_2	BobWhite_c44175_495	97.1
2A_2	BobWhite_c1124_305	97.1
2A_2	wsnp_Ex_rep_c66377_64570189	97.1
2A_2	Ra_c12109_2470	97.1
2A_2	wsnp_Ra_c4850_8698731	97.1
2A_2	Tdurum_contig55330_161	97.1
2A_2	Ra_c1257_2228	97.1
2A_2	wsnp_Ex_rep_c75827_73041653	97.1
2A_2	wsnp_Ex_c8587_14418021	97.1
2A_2	wsnp_Ex_c20445_29515644	97.1
2A_2	wsnp_BG608354A_Ta_2_1	97.1
2A_2	wsnp_be498599A_Ta_2_2	97.1
2A_2	Tdurum_contig75565_1593	97.1
2A_2	Tdurum_contig75565_1388	97.1
2A_2	Tdurum_contig52873_265	97.1
2A_2	RAC875_rep_c113937_102	97.1
2A_2	RAC875_c3814_437	97.1
2A_2	RAC875_c29377_521	97.1
2A_2	Ra_c32576_1027	97.1
2A_2	Excalibur_rep_c66270_789	97.1
2A_2	CAP7_c11156_108	97.1
2A_2	BobWhite_c38716_323	97.1
2A_2	RAC875_c9898_1212	97.1
2A_2	RAC875_c48167_574	97.1
2A_2	Kukri_c4213_2733	97.1
2A_2	IAAV2090	97.1
2A_2	IAAV1361	97.1
2A_2	Excalibur_c16393_274	97.1
2A_2	Ex_c39005_750	97.1
2A_2	wsnp_Ex_c2030_3807284	97.1
2A_2	wsnp_Ex_c12068_19316125	97.1
2A_2	RAC875_c2054_191	97.1
2A_2	Ra_c20621_564	97.1
2A_2	Kukri_rep_c105807_101	97.1
2A_2	JD_c14920_380	97.1
2A_2	Ex_c12563_1279	97.1
2A_2	CAP11_s9154_121	97.1
2A_2	Excalibur_rep_c67903_445	97.1
2A_2	Kukri_c4213_2363	97.1
2A_2	wsnp_Ra_rep_c88200_80168527	97.1
2A_2	wsnp_Ra_c58188_60005934	97.1
2A_2	wsnp_Ra_c30244_39523512	97.1
2A_2	wsnp_Ra_c10861_17763060	97.1
2A_2	wsnp_Ku_c38662_47257696	97.1
2A_2	wsnp_Ex_c14760_22866930	97.1
2A_2	wsnp_Ex_c14717_22800771	97.1
2A_2	wsnp_Ex_c1064_2034518	97.1
2A_2	wsnp_BE517627A_Ta_2_1	97.1
2A_2	wsnp_BE399936A_Ta_2_1	97.1
2A_2	Tdurum_contig94996_512	97.1
2A_2	Tdurum_contig93110_358	97.1
2A_2	Tdurum_contig65916_1270	97.1
2A_2	Tdurum_contig62559_146	97.1
2A_2	Tdurum_contig5115_262	97.1
2A_2	Tdurum_contig5094_505	97.1
2A_2	Tdurum_contig42041_4577	97.1
2A_2	Tdurum_contig11876_1375	97.1
2A_2	RAC875_rep_c101788_71	97.1
2A_2	RAC875_c76620_361	97.1
2A_2	RAC875_c3102_959	97.1
2A_2	Ra_c7199_1504	97.1
2A_2	Ra_c15292_990	97.1
2A_2	Kukri_rep_c102166_1016	97.1
2A_2	Kukri_c5358_1252	97.1
2A_2	Kukri_c12194_1322	97.1
2A_2	Ku_c13599_707	97.1
2A_2	IACX1022	97.1
2A_2	IAAV99	97.1
2A_2	IAAV7492	97.1
2A_2	IAAV6661	97.1
2A_2	GENE-1326_350	97.1
2A_2	GENE-0922_327	97.1
2A_2	Excalibur_c7154_886	97.1
2A_2	Excalibur_c18267_118	97.1
2A_2	Ex_c4639_2631	97.1
2A_2	CAP7_rep_c6939_197	97.1
2A_2	CAP7_c239_267	97.1
2A_2	BS00097263_51	97.1
2A_2	BS00080997_51	97.1
2A_2	BS00078923_51	97.1
2A_2	BS00073720_51	97.1
2A_2	BS00031140_51	97.1
2A_2	BS00010932_51	97.1
2A_2	wsnp_Ex_c19319_28253742	97.1
2A_2	wsnp_Ra_c18391_27447178	97.1
2A_2	Tdurum_contig59369_133	97.1
2A_2	Tdurum_contig10910_1662	97.1
2A_2	Tdurum_contig10096_71	97.1
2A_2	RAC875_c19144_117	97.1
2A_2	Kukri_c38852_100	97.1
2A_2	JD_c3358_1128	97.1
2A_2	IAAV9197	97.1
2A_2	IAAV6321	97.1
2A_2	Ex_c5366_1904	97.1
2A_2	Kukri_rep_c82871_113	97.1
2A_2	BobWhite_c9626_246	97.1
2A_2	Tdurum_contig15610_321	97.1
2A_2	RAC875_c41731_321	97.1
2A_2	Ra_c15346_447	97.1
2A_2	BobWhite_rep_c50548_180	97.1
2A_2	Tdurum_contig10356_818	97.1
2A_2	Tdurum_contig10079_675	97.1
2A_2	BS00100472_51	97.1
2A_2	RAC875_c37015_73	97.1
2A_2	Excalibur_c4978_605	97.1
2A_2	Ku_c27939_333	97.1
2A_2	RAC875_c4267_1269	97.1
2A_2	wsnp_Ex_c45617_51361414	97.1
2A_2	GENE-0940_83	97.1
2A_2	wsnp_CAP11_rep_c6137_2841945	97.1
2A_2	Kukri_c49600_1890	97.1
2A_2	Tdurum_contig75776_2822	97.1
2A_2	wsnp_Ku_c16371_25240695	97.1
2A_2	Tdurum_contig44383_273	97.1
2A_2	GENE-1057_41	97.1
2A_2	Ex_c67187_805	97.1
2A_2	Tdurum_contig6356_150	97.1
2A_2	BobWhite_c21469_255	97.1
2A_2	Tdurum_contig12179_75	97.1
2A_2	tplb0047f03_349	97.1
2A_2	RAC875_c26362_83	97.1
2A_2	Ku_c14091_814	97.1
2A_2	BS00011045_51	97.1
2A_2	Ex_c4639_2851	97.1
2A_2	RAC875_c8300_136	97.1
2A_2	Ra_c21219_505	97.1
2A_2	Tdurum_contig61689_135	97.1
2A_2	wsnp_Ex_rep_c66615_64916512	97.5
2A_2	wsnp_Ex_rep_c66615_64916114	97.5
2A_2	Tdurum_contig42524_87	97.5
2A_2	RAC875_c41194_218	97.5
2A_2	RAC875_c11682_1624	97.5
2A_2	wsnp_Ra_c11564_18736249	97.5
2A_2	Tdurum_contig42517_283	97.5
2A_2	Tdurum_contig76960_213	97.5
2A_2	Ku_c59581_1412	97.5
2A_2	Kukri_c57491_132	98.3
2A_2	Kukri_c57491_156	98.3
2A_2	Excalibur_c65611_463	98.3
2A_2	TA001775-0903	98.8
2A_2	wsnp_Ex_rep_c66809_65184970	98.8
2A_2	Tdurum_contig27844_127	98.8
2A_2	Excalibur_c27023_134	99.2
2A_2	wsnp_Ex_c3869_7028759	99.2
2A_2	wsnp_Ex_c25057_34318425	99.2
2A_2	TA001220-1276	99.2
2A_2	IAAV9024	99.2
2A_2	IAAV444	99.2
2A_2	CAP7_c3491_203	99.2
2A_2	wsnp_Ku_rep_c69876_69364477	99.2
2A_2	wsnp_Ex_rep_c68599_67447926	99.2
2A_2	wsnp_Ex_rep_c66800_65171259	99.2
2A_2	wsnp_Ex_c31900_40635609	99.2
2A_2	IAAV5270	99.2
2A_2	IAAV5656	99.2
2A_2	Excalibur_rep_c66700_743	99.2
2A_2	BS00032606_51	100.5
2A_2	BS00060653_51	100.9
2A_2	TA001993-0199	106.9
2A_2	BS00029224_51	106.9
2A_2	BS00090128_51	106.9
2A_2	wsnp_BF145580A_Ta_2_2	106.9
2A_2	Tdurum_contig31316_197	106.9
2A_2	Tdurum_contig13957_864	108.3
2A_2	Tdurum_contig13957_866	108.3
2A_2	wsnp_CAP11_c838_518859	110.4
2A_2	RFL_Contig852_4295	110.4
2A_2	CAP7_c2791_231	110.4
2A_2	Tdurum_contig12589_325	110.4
2A_2	BobWhite_c41527_201	110.4
2A_2	RAC875_c6156_428	110.4
2A_2	Tdurum_contig11021_100	110.4
2A_2	Tdurum_contig50824_58	110.4
2A_2	RAC875_rep_c110315_435	113.9
2A_2	Kukri_c57078_153	118.6
2A_2	wsnp_Ex_c32910_41489631	118.6
2A_2	BS00049644_51	119.1
2A_2	Kukri_c24064_2095	119.5
2A_2	wsnp_Ra_c4503_8155485	119.5
2A_2	Kukri_c77549_236	122
2A_2	TA001848-0563	122
2A_2	TA001848-0389	122
2A_2	GENE-0685_571	122
2A_2	RAC875_c22045_435	125.8
2A_2	Tdurum_contig101781_53	127.1
2A_2	Excalibur_c34913_743	130.1
2A_2	IACX794	130.1
2A_2	Tdurum_contig13653_471	130.1
2A_2	Kukri_c25868_77	130.1
2A_2	Tdurum_contig5114_319	136.5
2A_2	Tdurum_contig13837_573	158.9
2A_2	BS00096882_51	158.9
2A_2	BS00077597_51	158.9
2A_2	BS00098423_51	159.4
2A_2	Excalibur_c40617_983	161.1
2A_2	BobWhite_c20952_105	161.1
2A_2	Kukri_c40121_373	161.1
2A_2	Tdurum_contig30325_334	161.1
2A_2	Excalibur_c14536_1129	164.5
2A_2	BS00029332_51	164.5
2A_2	RAC875_c41087_67	168.8
2A_2	RAC875_c110332_54	168.8
2A_2	wsnp_Ex_rep_c66358_64543218	168.8
2A_2	Ku_c68792_310	168.8
2A_2	GENE-1293_97	168.8
2A_2	Kukri_rep_c69608_375	168.8
2A_2	Kukri_rep_c104611_210	168.8
2A_2	Ku_c35823_743	168.8
2A_2	Excalibur_rep_c108662_154	168.8
2A_2	Excalibur_rep_c108662_132	168.8
2A_2	BS00022587_51	168.8
2A_2	Kukri_c13006_731	168.8
2A_2	Excalibur_c65910_246	168.8
2A_2	CAP12_c2521_103	168.8
2A_2	wsnp_Ra_c10658_17500498	168.8
2A_2	Tdurum_contig55729_1220	168.8
2A_2	RAC875_rep_c77617_1454	168.8
2A_2	RAC875_c17696_225	168.8
2A_2	Kukri_c9145_1193	168.8
2A_2	Excalibur_c7282_512	168.8
2A_2	Excalibur_c2426_1756	168.8
2A_2	Excalibur_c22687_1139	168.8
2A_2	BobWhite_rep_c60776_1124	168.8
2A_2	BobWhite_c39518_134	168.8
2A_2	BobWhite_c11081_1619	168.8
2A_2	Kukri_rep_c69608_2762	168.8
2A_2	RAC875_c25988_214	168.8
2A_2	RAC875_c110838_423	168.8
2A_2	Excalibur_c38761_288	168.8
2A_2	Ku_c69608_894	168.8
2A_2	Excalibur_c11870_477	168.8
2A_2	Kukri_c47259_416	173.9
2A_2	IACX1163	173.9
2A_2	BS00065865_51	173.9
2A_2	wsnp_Ex_c59095_60108185	173.9
2A_2	wsnp_Ra_c32271_41304469	173.9
2A_2	wsnp_Ex_c10751_17505459	173.9
2A_2	RAC875_c42648_115	173.9
2A_2	Kukri_c33828_801	173.9
2A_2	wsnp_Ex_c59095_60108097	173.9
2A_2	BobWhite_c26570_282	173.9
2A_2	Jagger_c9554_114	173.9
2A_2	GENE-2352_964	173.9
2A_2	wsnp_Ex_c59095_60108118	173.9
2A_2	wsnp_Ex_c16627_25162391	173.9
2A_2	Excalibur_c685_165	174.8
2A_2	Kukri_c65988_297	174.8
2A_2	Kukri_c8502_180	174.8
2A_2	BS00081506_51	175.2
2A_2	BS00081507_51	175.2
2A_2	BS00093201_51	175.2
2A_2	BS00037160_51	175.2
2A_2	BobWhite_c16923_64	176
2A_2	Ku_c15323_908	176
2A_2	wsnp_Ex_c45487_51267140	177.3
2A_2	BobWhite_c39437_110	177.3
2A_2	Tdurum_contig11678_289	177.3
2A_2	tplb0050m09_1890	177.8
2A_2	RAC875_c3378_1345	178.2
2A_2	RFL_Contig3509_229	178.6
2A_2	CAP7_c1862_460	183.3
2A_2	Excalibur_c14953_899	185.8
2A_2	wsnp_RFL_Contig2763_2509104	185.8
2A_2	wsnp_Ex_c14953_23104041	185.8
2A_2	GENE-1908_331	186.3
2A_2	BS00067907_51	187.2
2A_2	Tdurum_contig45661_684	203.4
2A_2	Kukri_c37742_69	203.8
2A_2	wsnp_Ex_c15681_24015996	203.8
2A_2	wsnp_Ex_c15681_24015303	203.8
2A_2	wsnp_Ex_c15681_24016359	203.8
2A_2	Tdurum_contig60298_219	203.8
2A_2	BS00022265_51	203.8
2A_2	BS00011478_51	203.8
2A_2	Tdurum_contig60298_468	203.8
2A_2	wsnp_Ex_c45_98113	203.8
2A_2	wsnp_Ex_c45_97816	203.8
2A_2	Tdurum_contig93508_295	203.8
2A_2	Tdurum_contig93508_119	203.8
2A_2	Tdurum_contig60205_806	203.8
2A_2	Tdurum_contig60205_509	203.8
2A_2	wsnp_Ra_c66636_64922359	204.7
2A_2	wsnp_Ra_c66636_64923321	204.7
2A_2	RAC875_c25848_122	207.2
2A_2	Kukri_c2687_1407	207.2
2A_2	Excalibur_c99029_69	207.2
2A_2	Excalibur_c42110_210	207.2
2A_2	Ra_c3750_270	207.2
2A_2	RAC875_rep_c105489_488	207.2
2A_2	Tdurum_contig6086_269	208.5
2A_2	Kukri_rep_c68300_216	208.5
2A_2	BS00030165_51	208.5
2A_2	BobWhite_c17783_174	208.5
2A_2	BS00022409_51	210.2
2A_2	Excalibur_c3727_1773	210.2
2A_2	Tdurum_contig86183_177	210.6
2A_2	Tdurum_contig49145_914	210.6
2A_2	Tdurum_contig86183_221	210.6
2A_2	BobWhite_c31163_694	211.9
2A_2	Tdurum_contig82404_354	211.9
2A_2	RFL_Contig927_1591	211.9
2A_2	Kukri_c42972_148	211.9
2A_2	Excalibur_c64568_149	212.3
2A_2	BS00000209_51	212.3
2A_2	TA004785-1734	217.8
2A_2	IACX4345	223.4
2A_2	Ex_c36309_435	236.3
2A_2	Excalibur_c91176_326	236.3
2A_2	Tdurum_contig52350_296	236.3
2A_2	BS00010477_51	236.3
2A_2	Tdurum_contig49366_118	236.3
2A_2	RAC875_c22328_490	236.3
2A_2	RAC875_c22328_1356	236.3
2A_2	Kukri_c25632_86	236.3
2A_2	Excalibur_c7971_985	236.3
2A_2	Excalibur_c7971_712	236.3
2A_2	CAP12_c1380_238	236.3
2A_2	BS00010760_51	236.3
2A_2	wsnp_Ex_c3695_6740111	236.3
2A_2	Tdurum_contig52350_588	236.3
2A_2	Kukri_c44231_1576	236.3
2A_2	wsnp_Ex_c905_1748920	236.3
2A_2	wsnp_Ex_c10555_17236072	236.3
2A_2	Tdurum_contig9224_402	236.3
2A_2	Tdurum_contig52350_170	236.3
2A_2	Tdurum_contig42282_11463	236.3
2A_2	Tdurum_contig42282_10323	236.3
2A_2	Tdurum_contig16904_167	236.3
2A_2	Ra_c2467_333	236.3
2A_2	Kukri_c30117_214	236.3
2A_2	Kukri_c11099_1198	236.3
2A_2	Ku_c10387_272	236.3
2A_2	IAAV6102	236.3
2A_2	IAAV5232	236.3
2A_2	Excalibur_c17000_557	236.3
2A_2	BS00097473_51	236.3
2A_2	Tdurum_contig12556_183	236.3
2A_2	RAC875_rep_c108836_55	236.3
2A_2	RAC875_c34370_332	236.3
2A_2	wsnp_Ku_c2838_5355065	237.1
2A_2	wsnp_Ku_c2838_5354231	237.1
2A_2	tplb0021g21_595	237.1
2A_2	Tdurum_contig92425_3144	237.1
2A_2	RFL_Contig5122_974	237.1
2A_2	RAC875_c35688_382	237.1
2A_2	BS00087932_51	237.1
2A_2	BS00077504_51	237.1
2A_2	BS00062869_51	237.1
2A_2	tplb0025l18_1788	237.1
2A_2	RAC875_c68651_391	237.1
2A_2	Kukri_c21008_657	237.1
2A_2	Excalibur_c62106_387	237.1
2A_2	BS00098033_51	237.1
2A_2	Tdurum_contig50720_204	237.1
2A_2	Tdurum_contig8350_243	237.1
2A_2	IAAV4880	237.1
2A_2	Tdurum_contig50720_354	237.1
2A_2	Tdurum_contig92425_431	237.6
2A_2	IAAV881	238.4
2A_2	Kukri_rep_c104982_217	238.4
2A_2	Kukri_c89717_64	238.4
2A_2	Tdurum_contig23578_138	238.4
2A_2	RAC875_c22214_142	239.3
2A_2	BS00072914_51	239.3
2A_2	Tdurum_contig64286_268	239.3
2A_2	Kukri_c36985_104	240.1
2A_2	BS00022252_51	240.1
2A_2	BS00007689_51	241.6
2A_2	BS00082153_51	248.8
2A_2	BS00022467_51	248.8
2A_2	Tdurum_contig45787_512	249.2
2A_2	D_contig24918_195	249.2
2A_2	BS00064544_51	249.6
2A_2	BS00064541_51	249.6
2A_2	Kukri_c52608_142	249.6
2A_2	BS00063578_51	249.6
2A_2	RAC875_rep_c72517_1215	249.6
2A_2	Ra_c72517_981	249.6
2A_2	BS00072462_51	249.6
2A_2	CAP12_c449_95	249.6
2A_2	Excalibur_c24213_314	249.6
2B_1	BobWhite_c17047_268	0
2B_1	Tdurum_contig10208_447	0
2B_1	Tdurum_contig10208_452	0
2B_1	BobWhite_c12144_216	0.9
2B_1	BobWhite_c20346_138	0.9
2B_1	Kukri_c19266_779	0.9
2B_1	Kukri_c3701_1980	0.9
2B_1	Kukri_c3701_330	0.9
2B_1	Tdurum_contig11802_583	0.9
2B_1	tplb0054d13_2445	0.9
2B_1	wsnp_Ku_c3663_6748611	0.9
2B_1	BS00023068_51	18.4
2B_1	BS00027693_51	18.4
2B_1	GENE-1230_189	18.4
2B_1	Kukri_c660_1773	18.4
2B_1	Kukri_c7339_1716	18.4
2B_1	RAC875_c38665_247	18.4
2B_1	BobWhite_c10903_399	19.6
2B_1	Kukri_c14626_425	19.6
2B_1	Kukri_c30847_551	19.6
2B_1	wsnp_Ex_c326_636368	19.6
2B_1	Kukri_c1175_873	20.5
2B_1	RAC875_c2504_670	21.3
2B_1	RAC875_c38307_91	23
2B_1	BS00009771_51	23.5
2B_1	RAC875_c16881_1400	23.5
2B_1	BobWhite_c2949_1083	23.9
2B_1	BobWhite_c5668_115	23.9
2B_1	BobWhite_c7145_355	23.9
2B_1	BobWhite_rep_c64787_359	23.9
2B_1	Kukri_c98858_299	23.9
2B_1	Kukri_rep_c92967_369	24.3
2B_1	Kukri_c12804_676	24.8
2B_1	BS00044806_51	26.4
2B_1	Excalibur_c1787_1271	26.4
2B_1	Excalibur_c841_609	26.4
2B_1	IAAV8700	26.4
2B_1	Kukri_c16758_443	26.4
2B_1	Kukri_c41556_619	26.4
2B_1	Tdurum_contig93602_268	26.4
2B_1	wsnp_Ex_c18354_27181431	26.4
2B_1	BS00110996_51	27.3
2B_1	Excalibur_c19499_948	27.3
2B_1	Excalibur_c42928_135	27.3
2B_1	GENE-1018_99	27.3
2B_1	Kukri_c56081_307	27.3
2B_1	RAC875_c4331_1627	27.3
2B_1	BobWhite_c25359_132	28.1
2B_1	BobWhite_c930_401	28.1
2B_1	Kukri_c10749_489	28.1
2B_1	Kukri_c23961_636	28.1
2B_1	Kukri_c30668_294	28.1
2B_1	RAC875_c63883_76	28.1
2B_1	RAC875_c87052_193	28.1
2B_1	Tdurum_contig15440_616	28.1
2B_1	wsnp_Ex_c3685_6723631	28.1
2B_1	wsnp_Ex_c3740_6815132	28.1
2B_1	wsnp_Ra_c10712_17572884	28.1
2B_1	Excalibur_c14396_1629	28.6
2B_1	GENE-1711_923	28.6
2B_1	IAAV7308	28.6
2B_1	RAC875_c31756_83	28.6
2B_1	BS00070051_51	29
2B_1	BS00072619_51	29
2B_1	BS00072620_51	29
2B_1	wsnp_Ku_c2486_4751761	36.9
2B_1	BS00011466_51	37.4
2B_1	RAC875_c829_2014	37.4
2B_1	RAC875_rep_c111225_330	37.4
2B_1	Excalibur_c40567_1893	41.2
2B_1	TA001263-0453	41.2
2B_1	Tdurum_contig54254_423	41.2
2B_1	wsnp_Ra_rep_c117300_96881829	41.2
2B_1	Excalibur_c27388_252	43.8
2B_1	Excalibur_c46590_290	43.8
2B_1	Excalibur_c47288_232	43.8
2B_1	Kukri_c48_1058	43.8
2B_1	Kukri_rep_c104422_192	43.8
2B_1	wsnp_Ex_c1629_3104356	43.8
2B_2	Excalibur_c89477_207	0
2B_2	BobWhite_c9376_153	0
2B_2	BS00065276_51	0
2B_2	Excalibur_c19260_105	0.4
2B_2	RAC875_c4314_993	0.4
2B_2	wsnp_BF146221B_Ta_2_2	0.8
2B_2	wsnp_Ra_c407_862316	7.2
2B_2	JD_c6368_651	11.5
2B_2	Kukri_c34861_523	11.5
2B_2	Tdurum_contig54704_176	11.5
2B_2	wsnp_BG275030A_Td_2_1	11.5
2B_2	BobWhite_c41535_52	11.9
2B_2	Kukri_c5497_312	11.9
2B_2	wsnp_Ex_c21092_30220702	11.9
2B_2	wsnp_Ex_c21092_30220342	11.9
2B_2	Excalibur_c23201_970	17.4
2B_2	Kukri_c34897_444	17.4
2B_2	Ra_c19690_1458	17.4
2B_2	Ra_c19690_1998	17.4
2B_2	RAC875_c19690_358	17.4
2B_2	RAC875_c58279_279	17.4
2B_2	BobWhite_c10578_272	21.7
2B_2	Tdurum_contig27976_414	21.7
2B_2	BobWhite_c31129_60	22.1
2B_2	Kukri_rep_c69288_529	41.2
2B_2	RAC875_rep_c119905_116	41.2
2B_2	Excalibur_c6097_2208	41.2
2B_2	TA001146-1869	41.2
2B_2	RAC875_c41476_217	47.2
2B_2	Tdurum_contig56331_545	47.2
2B_2	BS00030497_51	47.7
2B_2	Excalibur_rep_c68899_1400	47.7
2B_2	Excalibur_rep_c68899_191	47.7
2B_2	IAAV1101	47.7
2B_2	JD_c11869_1297	47.7
2B_2	Ku_c68678_924	47.7
2B_2	Tdurum_contig47202_1699	47.7
2B_2	RAC875_c86069_65	47.7
2B_2	BS00022966_51	48.9
2B_2	RFL_Contig996_818	48.9
2B_2	BS00048873_51	49.8
2B_2	Kukri_c36879_83	49.8
2B_2	Tdurum_contig30989_79	50.2
2B_2	Tdurum_contig28227_265	51.1
2B_2	Tdurum_contig28227_304	51.1
2B_2	BobWhite_c26775_217	69.9
2B_2	wsnp_Ex_c12671_20140295	69.9
2B_2	Excalibur_c15412_728	89.5
2B_2	GENE-2904_476	89.5
2B_2	Tdurum_contig94521_738	89.5
2B_2	Ku_c34010_1016	90.4
2B_2	BS00040251_51	90.8
2B_2	Kukri_c36783_91	90.8
2B_2	Kukri_c15359_254	91.2
2B_2	Tdurum_contig76426_861	91.2
2B_2	RAC875_c1226_652	93
2B_2	Ra_c4397_542	93
2B_2	GENE-1147_486	93
2B_2	wsnp_Ex_c9248_15372536	93.8
2B_2	GENE-1389_59	93.8
2B_2	BS00092275_51	93.8
2B_2	wsnp_Ex_c14595_22634031	93.8
2B_2	Kukri_c22200_1171	93.8
2B_2	wsnp_BE399688B_Ta_2_1	93.8
2B_2	IACX1412	93.8
2B_2	Excalibur_rep_c106124_239	93.8
2B_2	BS00092273_51	93.8
2B_2	BS00073426_51	94.2
2B_2	Ex_c16854_1307	94.7
2B_2	BS00070091_51	96.5
2B_2	BobWhite_c7786_376	103.9
2B_2	BobWhite_c5820_169	103.9
2B_2	TA001322-1176	105.6
2B_2	wsnp_Ex_rep_c101906_87187119	105.6
2B_2	wsnp_Ex_c33246_41764093	105.6
2B_2	Kukri_c10054_567	105.6
2B_2	BobWhite_c948_52	105.6
2B_2	wsnp_Ku_c27759_37702654	106
2B_2	Kukri_rep_c94009_116	106
2B_2	Excalibur_c44495_105	106
2B_2	BS00091007_51	106
2B_2	wsnp_JD_c6350_7517130	106
2B_2	RAC875_c97988_87	106
2B_2	Kukri_c39230_362	106
2B_2	BS00043103_51	106
2B_2	wsnp_Ex_c1459_2797709	106.8
2B_2	Ku_c4777_2494	106.8
2B_2	wsnp_CAP7_c2233_1085003	108.1
2B_2	wsnp_BF291736B_Ta_1_1	108.1
2B_2	IAAV1296	108.1
2B_2	wsnp_Ku_c2725_5163091	108.1
2B_2	IACX6743	108.1
2B_2	wsnp_Ku_c18923_28319203	108.1
2B_2	wsnp_Ex_rep_c102216_87433489	108.1
2B_2	wsnp_Ex_c29108_38173309	108.1
2B_2	RAC875_c46023_492	108.1
2B_2	Excalibur_rep_c107558_367	108.1
2B_2	Excalibur_c41397_439	108.1
2B_2	Ex_c8832_2521	108.1
2B_2	wsnp_Ex_c9935_16358536	108.1
2B_2	wsnp_Ex_c2557_4761174	108.1
2B_2	BS00034315_51	108.1
2B_2	wsnp_Ex_c38739_46196393	108.1
2B_2	Kukri_c6830_572	119.4
2B_2	Tdurum_contig20589_247	119.4
2B_2	RAC875_c63112_460	119.4
2B_2	BS00061269_51	119.4
2B_2	BobWhite_rep_c61602_139	119.4
2B_2	RAC875_rep_c109975_192	119.4
2B_2	Excalibur_c18417_285	119.4
2B_2	wsnp_Ex_c4218_7618252	123.2
2B_2	Kukri_c3096_1411	123.2
2B_2	Excalibur_c3776_2025	123.2
2B_2	TA002306-1975	124.1
2B_2	BS00072379_51	124.1
2B_2	BobWhite_c43708_93	133.3
2B_2	D_contig09015_259	144.5
2B_2	Tdurum_contig92604_368	144.5
2B_2	Excalibur_c84741_99	144.5
2B_2	Tdurum_contig26542_281	147.1
2B_2	Tdurum_contig26542_457	147.5
2B_2	RFL_Contig1987_3440	147.5
2B_2	Tdurum_contig44075_1141	147.5
2B_2	RAC875_rep_c70705_84	147.5
2B_2	RAC875_rep_c69892_151	147.5
2B_2	Ra_c18654_239	167
2B_2	Ra_c18654_370	167
2B_2	wsnp_JD_c47318_32176833	167.8
2B_2	wsnp_Ex_c46576_52042185	167.8
2B_2	wsnp_Ex_rep_c67840_66538714	167.8
2B_2	Kukri_c12847_192	169.1
2B_2	Excalibur_c37462_187	169.1
2B_2	Excalibur_c30728_218	169.1
2B_2	BobWhite_c26509_233	169.1
2B_2	Kukri_c17303_211	169.1
2B_2	wsnp_Ex_c1758_3326792	173.4
2B_2	RAC875_c14316_584	173.4
2B_2	Ex_c30517_1207	173.4
2B_2	Ra_c14316_850	173.4
2B_2	Kukri_c1782_1678	186.1
2B_2	BS00010567_51	187
2B_2	RAC875_rep_c91134_949	187
2B_2	Kukri_c7666_746	187
2B_2	Kukri_c7666_2637	187
2B_2	Kukri_c7666_1389	187
2B_2	Kukri_c49007_501	187
2B_2	Kukri_c3024_1163	187
2B_2	IAAV677	187
2B_2	GENE-1444_220	187
2B_2	D_F5MV3MU01EYV2M_33	187
2B_2	BobWhite_c23054_1464	187
2B_2	BobWhite_c23054_1192	187
2B_2	BobWhite_c23046_293	187
2B_2	wsnp_RFL_Contig3522_3685860	187
2B_2	Ra_c10607_524	187
2B_2	Kukri_c15782_508	187.4
2B_2	BobWhite_c31268_254	187.4
2B_2	BobWhite_c59027_68	187.4
2B_2	Excalibur_c25414_806	187.4
2B_2	wsnp_Ex_c922_1775246	189.5
2B_2	TA001281-1436	190.3
2B_2	wsnp_Ra_rep_c109853_92677055	190.8
2B_2	wsnp_Ex_c58274_59639258	191.2
2B_2	wsnp_Ra_c31353_40494768	191.6
2B_2	wsnp_CAP12_c197_110707	191.6
2B_2	Kukri_c18459_2622	191.6
2B_2	CAP11_c1036_238	191.6
2B_2	BS00080967_51	191.6
2B_2	Ra_c31353_172	191.6
2B_2	wsnp_Ex_c12922_20472434	197.2
2B_2	RAC875_rep_c85788_180	197.2
2B_2	CAP8_rep_c8162_101	197.2
2B_2	CAP8_rep_c6372_264	197.2
2B_2	BS00086322_51	197.2
2B_2	BS00035276_51	197.2
2B_2	BobWhite_rep_c64049_232	197.2
2B_2	BobWhite_c8253_397	197.2
2B_2	BobWhite_c3871_1596	197.2
2B_2	Tdurum_contig17626_268	197.2
2B_2	BobWhite_c908_64	197.2
2B_2	wsnp_CAP11_rep_c4111_1943544	197.2
2B_2	BS00081231_51	197.2
2B_2	Excalibur_c10634_156	197.2
2B_2	wsnp_Ex_c5619_9884202	197.2
2B_2	Excalibur_c76665_98	197.2
2B_2	Excalibur_c5619_208	197.2
2B_2	BS00067094_51	197.2
2B_2	BS00011096_51	197.2
2B_2	BS00010012_51	197.2
2B_2	BS00046165_51	211.5
2B_2	IAAV2917	211.5
2B_2	Excalibur_c36280_764	211.5
2B_2	BS00046164_51	211.5
2B_2	Tdurum_contig27907_216	216.2
2B_2	wsnp_Ra_c16333_24961476	216.2
2B_2	Tdurum_contig27907_359	216.2
2B_2	Tdurum_contig12879_1273	219.8
2B_2	Kukri_c36266_120	219.8
2B_2	BobWhite_c32938_366	220.6
2B_2	wsnp_Ex_c3506_6415495	220.6
2B_2	JD_c9115_954	220.6
2B_2	wsnp_Ku_c15498_24122936	220.6
2B_2	Excalibur_c14988_872	220.6
2B_2	BS00064740_51	220.6
2B_2	GENE-0663_75	220.6
2B_2	wsnp_Ex_c3506_6415581	220.6
2B_2	wsnp_Ex_c3506_6414757	220.6
2B_2	wsnp_Ku_c7297_12596001	220.6
2B_2	wsnp_Ex_c24135_33382700	220.6
2B_2	Tdurum_contig72054_94	220.6
2B_2	Tdurum_contig11711_293	220.6
2B_2	Kukri_c15498_657	220.6
2B_2	Kukri_c15498_1679	220.6
2B_2	Ku_c51309_212	220.6
2B_2	BS00047073_51	220.6
2B_2	BS00009511_51	220.6
2B_2	BobWhite_c32938_264	220.6
2B_2	BobWhite_c29596_649	220.6
2B_2	BobWhite_c1472_59	220.6
2B_2	Excalibur_c2484_2113	222
2B_2	Kukri_c15555_587	222
2B_2	Tdurum_contig12761_125	223.2
2B_2	Kukri_c51540_490	223.2
2B_2	BS00036456_51	223.2
2B_2	Tdurum_contig54784_485	223.2
2B_2	Tdurum_contig12761_230	223.2
2B_2	Tdurum_contig17826_338	227
2B_2	Ku_c4168_1399	227
2B_2	Tdurum_contig67254_504	231.3
2B_2	tplb0024e19_1029	231.3
2B_2	Excalibur_c17745_493	240.7
2B_2	wsnp_RFL_Contig3917_4326857	241.1
2B_2	wsnp_Ex_c13865_21720307	241.1
2B_2	Tdurum_contig28795_381	241.1
2B_2	Tdurum_contig28795_322	241.1
2B_2	Tdurum_contig28795_273	241.1
2B_2	Tdurum_contig28795_219	241.1
2B_2	RAC875_rep_c83093_126	241.1
2B_2	RAC875_c51420_237	241.1
2B_2	RAC875_c40992_68	241.1
2B_2	RAC875_c20979_234	241.1
2B_2	Excalibur_c37753_754	241.1
2B_2	Excalibur_c37753_655	241.1
2B_2	Excalibur_c2157_173	241.1
2B_2	BobWhite_c9690_94	241.1
2B_2	RAC875_c26697_589	241.1
2B_2	RAC875_c40992_113	241.1
2B_2	Tdurum_contig59546_695	244.9
2B_2	RAC875_c16752_283	244.9
2B_2	Tdurum_contig15649_215	245.4
2B_2	BS00043338_51	245.4
2B_2	BS00100981_51	245.8
2B_2	Excalibur_c10637_515	245.8
2B_2	RAC875_c35399_497	245.8
2B_2	BS00009060_51	245.8
2B_2	RAC875_c37639_94	250.9
2B_2	GENE-0862_110	250.9
2B_2	Excalibur_c18966_804	250.9
2B_2	Excalibur_c18966_1008	250.9
2B_2	BS00010988_51	250.9
2B_3	Kukri_c12616_353	0
2B_3	CAP12_rep_c5926_115	0
2B_3	CAP12_rep_c5926_51	0
2B_3	Excalibur_c27557_381	0
2B_3	Excalibur_c53027_323	0
2B_3	Excalibur_c7136_799	0
2B_3	Excalibur_c7136_823	0
2B_3	Excalibur_rep_c101660_546	0
2B_3	Jagger_c2273_166	0
2B_3	Jagger_c8098_88	0
2B_3	Kukri_c17483_568	0
2B_3	Kukri_c27574_725	0
2B_3	Kukri_c29272_363	0
2B_3	Kukri_c43403_346	0
2B_3	Kukri_c43403_412	0
2B_3	Kukri_c43403_594	0
2B_3	RAC875_c8780_441	0
2B_3	TA005827-0874	0
2B_3	Tdurum_contig11350_629	0
2B_3	Tdurum_contig19415_271	0
2B_3	Tdurum_contig19415_329	0
2B_3	Tdurum_contig29620_125	0
2B_3	Tdurum_contig29620_285	0
2B_3	Tdurum_contig61293_131	0
2B_3	Tdurum_contig74936_264	0
2B_3	Tdurum_contig74936_387	0
2B_3	Tdurum_contig74936_456	0
2B_3	Tdurum_contig7526_301	0
2B_3	tplb0036o16_1626	0
2B_3	wsnp_Ku_c23305_33210628	0
2B_3	wsnp_Ku_c23305_33210841	0
2B_3	wsnp_RFL_Contig1380_498125	0
2B_3	Excalibur_c53027_302	0
2B_3	wsnp_Ku_c34759_44069854	0
2B_3	D_contig36671_269	0
2B_3	Excalibur_c20058_339	0
2B_3	Tdurum_contig18901_188	0
2B_3	Tdurum_contig29620_207	0
2B_3	IAAV7837	0
2B_3	Kukri_c12616_844	0
2B_3	TA004902-0755	10
2B_3	BobWhite_c12911_788	10
2B_3	BobWhite_c7274_197	10
2B_3	BS00004413_51	10
2B_3	BS00019095_51	10
2B_3	CAP7_c2746_331	10
2B_3	CAP7_c4827_53	10
2B_3	CAP7_c4827_78	10
2B_3	Excalibur_c12675_1395	10
2B_3	Excalibur_c12971_253	10
2B_3	Excalibur_c1434_428	10
2B_3	Excalibur_c33221_681	10
2B_3	Excalibur_c48871_625	10
2B_3	GENE-1056_55	10
2B_3	GENE-1151_455	10
2B_3	IAAV1502	10
2B_3	IAAV1798	10
2B_3	IAAV5401	10
2B_3	Ku_c67680_195	10
2B_3	Kukri_c10869_1366	10
2B_3	Kukri_c10869_1591	10
2B_3	Kukri_c10869_489	10
2B_3	Kukri_c17_967	10
2B_3	Kukri_c21135_1071	10
2B_3	Kukri_c4117_2196	10
2B_3	Kukri_c60352_344	10
2B_3	RAC875_c16727_1826	10
2B_3	RAC875_c3259_673	10
2B_3	RAC875_c5082_1098	10
2B_3	RAC875_c5082_841	10
2B_3	RAC875_rep_c116263_97	10
2B_3	RAC875_rep_c119322_54	10
2B_3	RFL_Contig2324_729	10
2B_3	Tdurum_contig10048_61	10
2B_3	Tdurum_contig10295_374	10
2B_3	Tdurum_contig52627_496	10
2B_3	Tdurum_contig52627_726	10
2B_3	wsnp_Ex_c10555_17235832	10
2B_3	wsnp_Ex_c3695_6740339	10
2B_3	wsnp_Ku_c18587_27915541	10
2B_3	BobWhite_rep_c64004_321	10
2B_3	BS00065302_51	10
2B_3	Excalibur_c12675_1789	10
2B_3	Excalibur_c56062_223	10
2B_3	Excalibur_c56550_71	10
2B_3	Kukri_c4117_160	10
2B_3	Kukri_c4117_2610	10
2B_3	Kukri_c657_1514	10
2B_3	RAC875_c78921_228	10
2B_3	RAC875_c78921_286	10
2B_3	RAC875_c78921_418	10
2B_3	RAC875_rep_c102485_468	10
2B_3	Tdurum_contig34572_243	10
2B_3	tplb0030f06_593	10
2B_3	Excalibur_c4372_262	10
2B_3	BS00025106_51	10
2B_3	BS00083329_51	10
2B_3	RAC875_c31214_58	10
2B_3	RAC875_c7735_338	10
2B_3	Tdurum_contig9071_215	10
2B_3	BobWhite_c20158_834	10
2B_3	BobWhite_c24069_257	10
2B_3	BobWhite_c7274_333	10
2B_3	BobWhite_rep_c64068_241	10
2B_3	BS00004224_51	10
2B_3	Excalibur_c14201_111	10
2B_3	Excalibur_c910_946	10
2B_3	GENE-0918_159	10
2B_3	Kukri_rep_c68903_301	10
2B_3	Kukri_rep_c68903_708	10
2B_3	Tdurum_contig27848_179	10
2B_3	Tdurum_contig28113_579	10
2B_3	Tdurum_contig82393_484	10
2B_3	Tdurum_contig82393_581	10
2B_3	IAAV8632	10
[truncated: 4,250 more rows]

## Sheet: Arnacoris Map
	Linkage map for the Arnacoris/ATRED #2 population
Linkage group	Marker	Position
1A_1	Tdurum_contig75952_351	0
1A_1	Kukri_c3888_1478	2.3
1A_1	Excalibur_c9509_1180	2.3
1A_1	Kukri_c18951_853	2.3
1A_1	Kukri_c29111_607	2.3
1A_1	RAC875_rep_c110533_92	2.3
1A_1	Tdurum_contig19376_154	2.3
1A_1	Tdurum_contig59794_640	2.3
1A_1	Tdurum_contig60323_605	2.3
1A_1	Tdurum_contig97729_491	2.3
1A_1	BobWhite_c1361_1187	2.3
1A_1	BS00022677_51	2.3
1A_1	Excalibur_rep_c70751_58	2.3
1A_1	RAC875_c42700_264	2.3
1A_1	Tdurum_contig60323_456	2.3
1A_1	Excalibur_c72544_414	8.7
1A_1	BS00014831_51	8.7
1A_1	RFL_Contig2831_1012	8.7
1A_1	BobWhite_c4246_367	8.7
1A_1	CAP11_c5610_92	8.7
1A_1	BS00096054_51	9.1
1A_1	Excalibur_c58555_110	9.1
1A_1	RFL_Contig3481_1669	9.1
1A_1	CAP7_c6316_80	10.1
1A_1	BobWhite_c4246_292	10.1
1A_1	BobWhite_c21669_430	11.9
1A_1	CAP12_c8501_370	11.9
1A_1	IACX2941	11.9
1A_1	Jagger_c1888_277	11.9
1A_1	TA001286-0611-w	11.9
1A_1	BS00023377_51	11.9
1A_1	Tdurum_contig46733_6628	12.4
1A_1	wsnp_Ex_c2868_5293485	15.6
1A_1	BS00023201_51	15.6
1A_1	BS00056550_51	15.6
1A_1	Excalibur_c2868_451	15.6
1A_1	Kukri_c22349_754	15.6
1A_1	Kukri_rep_c102231_265	15.6
1A_1	RAC875_c38756_141	15.6
1A_1	GENE-1118_58	15.6
1A_1	wsnp_RFL_Contig4735_5673999	15.6
1A_1	BS00079769_51	15.6
1A_1	BS00060058_51	15.6
1A_1	Excalibur_c87411_54	15.6
1A_1	BS00080187_51	16.2
1A_1	Excalibur_c71158_117	16.2
1A_1	Excalibur_c71158_54	16.2
1A_1	GENE-0411_723	16.2
1A_1	GENE-0411_807	16.2
1A_1	RFL_Contig1027_442	16.2
1A_1	wsnp_Ex_c57982_59470152	16.2
1A_1	wsnp_Ex_rep_c106111_90308719	16.2
1A_1	wsnp_BE405749B_Ta_2_1	16.2
1A_1	wsnp_Ku_c183_358844	16.2
1A_1	Excalibur_c17152_454	16.2
1A_1	BobWhite_c39996_85	16.2
1A_1	BobWhite_c863_1064	16.2
1A_1	BS00110375_51	16.2
1A_1	Kukri_c2446_683	16.2
1A_1	Kukri_c24615_385	16.2
1A_1	Kukri_c32052_171	16.2
1A_1	Kukri_c54157_315	16.2
1A_1	Kukri_s105761_144	16.2
1A_1	RAC875_c1710_376	16.2
1A_1	Tdurum_contig68827_61	16.8
1A_1	BS00022943_51	16.8
1A_1	CAP11_c852_603	16.8
1A_1	Kukri_c46939_83	16.8
1A_1	Tdurum_contig68827_118	16.8
1A_1	Kukri_c54157_348	16.8
1A_1	JD_c49343_475	17.3
1A_1	BS00003595_51	18
1A_1	RAC875_rep_c116934_270	18
1A_1	BS00023485_51	29.5
1A_1	Ex_c4876_1221	29.5
1A_1	Kukri_c2121_1334	29.5
1A_1	RFL_Contig1703_695	29.5
1A_1	Tdurum_contig42479_3800	29.5
1A_1	wsnp_Ex_c4876_8692783	29.5
1A_1	wsnp_JD_c7522_8606553	29.5
1A_1	IACX11001	29.5
1A_1	Kukri_c2121_2345	29.5
1A_1	Excalibur_c25175_512	29.9
1A_1	Excalibur_c58154_84	29.9
1A_1	RAC875_c20875_753	30.4
1A_1	BS00083459_51	30.4
1A_1	Excalibur_c45969_370	30.4
1A_1	Excalibur_c48152_818	30.4
1A_1	GENE-3336_136	30.4
1A_1	IAAV4132	30.4
1A_1	Jagger_c8952_378	30.4
1A_1	Kukri_c13513_878	30.4
1A_1	Kukri_c41943_535	30.4
1A_1	tplb0043h23_1346	30.4
1A_1	Jagger_rep_c10343_173	30.4
1A_1	Kukri_c37592_531	30.4
1A_1	BobWhite_c27474_124	30.4
1A_1	RAC875_c50463_808	30.4
1A_2	Kukri_c13593_203	0
1A_2	BobWhite_c4384_262	1.4
1A_2	BobWhite_c48591_394	1.4
1A_2	Excalibur_c7026_2635	1.4
1A_2	Kukri_c13136_1363	1.4
1A_2	wsnp_JD_c9290_10155594	1.4
1A_2	Kukri_c31964_109	5.2
1A_2	Tdurum_contig13937_2280	5.2
1A_2	Tdurum_contig41233_94	5.2
1A_2	Kukri_c31964_56	5.2
1A_2	Kukri_c12534_559	5.2
1A_2	Kukri_c45123_242	6.6
1A_2	Ra_c22663_367	8
1A_2	Tdurum_contig50355_685	8
1A_2	wsnp_Ex_c31983_40709866	8
1A_2	Kukri_c46010_146	8
1A_2	wsnp_Ex_c31983_40709607	8
1A_2	Excalibur_rep_c77404_218	8
1A_2	Tdurum_contig50355_269	8
1A_2	Kukri_c82555_88	9.4
1A_2	RAC875_c14066_452	9.4
1A_2	Tdurum_contig29280_216	9.4
1A_2	Tdurum_contig77289_179	9.4
1A_2	Tdurum_contig13946_241	9.4
1A_2	Tdurum_contig13946_329	9.4
1A_2	Kukri_c7579_559	9.4
1A_2	Kukri_c7579_443	9.4
1A_2	Tdurum_contig34019_260	10.4
1A_2	Tdurum_contig11004_613	10.4
1A_2	Tdurum_contig56382_747	10.4
1A_2	Tdurum_contig11004_400	10.4
1A_2	Tdurum_contig61515_522	10.4
1A_2	RAC875_c10090_963	10.4
1A_2	RAC875_rep_c111911_116	10.4
1A_2	Tdurum_contig61515_259	10.4
1A_2	JD_c12243_353	10.4
1A_2	IACX1592	11.8
1A_2	Excalibur_c200_1664	12.3
1A_2	TA003773-0807	12.3
1A_2	RAC875_c826_2186	12.3
1A_2	BS00012210_51	12.8
1A_2	IAAV5652	12.8
1A_2	Tdurum_contig47183_205	13.7
1A_2	Tdurum_contig47183_333	13.7
1A_2	BS00067339_51	14.2
1A_2	Tdurum_contig622_285	14.2
1A_2	Tdurum_contig76915_88	14.2
1A_2	Kukri_c4900_2435	14.2
1A_2	Tdurum_contig5008_635	14.2
1A_2	Excalibur_c12215_352	14.2
1A_2	Kukri_c65511_1057	14.2
1A_2	RAC875_c65431_351	14.2
1A_2	Tdurum_contig43646_147	14.2
1A_2	BS00022870_51	14.2
1A_2	Kukri_c3150_341	14.2
1A_2	Excalibur_rep_c114535_55	14.2
1A_2	BS00110151_51	14.2
1A_2	BS00013227_51	14.2
1A_2	BS00022426_51	14.2
1A_2	Ku_c11769_252	14.2
1A_2	Tdurum_contig5008_556	14.2
1A_2	Tdurum_contig69753_513	14.2
1A_2	Tdurum_contig9199_714	14.2
1A_2	Tdurum_contig16812_256	24.3
1A_2	BobWhite_c31155_350	27.6
1A_2	D_contig09975_188	27.6
1A_2	Kukri_c6106_470	27.6
1A_2	RAC875_rep_c85118_294	27.6
1A_2	Tdurum_contig53332_743	27.6
1A_2	Tdurum_contig102258_360	38.6
1A_2	Excalibur_c15013_208	40
1A_2	Tdurum_contig92564_326	40.9
1A_2	D_GDS7LZN02GQ7FT_204	40.9
1A_2	IACX592	40.9
1A_2	Kukri_c48690_148	40.9
1A_2	Tdurum_contig10964_143	40.9
1A_2	Tdurum_contig19658_147	40.9
1A_2	Tdurum_contig25641_409	40.9
1A_2	Tdurum_contig81875_148	40.9
1A_2	Tdurum_contig81875_184	40.9
1A_2	Tdurum_contig99671_174	40.9
1A_2	Tdurum_contig43203_318	41.4
1A_2	wsnp_Ex_c22963_32183009	41.4
1A_3	IACX5994	0
1A_3	wsnp_BE444305A_Td_2_1	0
1A_3	wsnp_Ex_c33452_41938013	0
1A_3	wsnp_Ex_c33452_41938159	0
1A_3	wsnp_RFL_Contig3542_3718200	0
1A_3	BobWhite_c5967_537	0.5
1A_3	BobWhite_c721_74	0.5
1A_3	Excalibur_c22768_963	0.5
1A_3	RAC875_rep_c72890_63	0.5
1A_3	wsnp_Ex_c41953_48657850	0.5
1A_3	Jagger_c6890_167	5.1
1A_3	Kukri_rep_c115111_251	5.1
1A_3	RAC875_c12348_720	5.1
1A_3	Tdurum_contig56158_60	5.1
1A_3	Ex_c26688_969	6.5
1A_3	Excalibur_c26688_138	6.5
1A_3	GENE-0033_233	6.5
1A_3	IAAV7172	6.5
1A_3	RFL_Contig5334_1969	6.5
1A_3	wsnp_BE443588A_Ta_2_2	6.5
1A_3	wsnp_Ex_c4612_8254533	6.5
1A_3	BS00095510_51	7
1A_3	wsnp_CAP11_c1815_982483	7
1A_3	Ex_c2226_244	7
1A_3	BS00078085_51	7
1A_3	BS00080076_51	7
1A_3	BS00068391_51	7
1A_3	Tdurum_contig96086_74	7
1A_3	BobWhite_c41272_159	7
1A_3	BobWhite_c22134_398	8.2
1A_3	tplb0059d21_1032	8.2
1A_3	BS00037976_51	8.2
1A_3	RAC875_c32379_216	8.2
1A_3	Tdurum_contig20183_507	8.2
1A_3	wsnp_BE444359A_Ta_2_1	8.2
1A_3	BS00023203_51	8.2
1A_3	RAC875_c67771_805	8.2
1A_3	BobWhite_rep_c65812_710	10.1
1A_3	wsnp_CAP8_rep_c3938_1936666	10.1
1A_3	Ra_c29200_300	10.5
1A_3	Tdurum_contig51833_439	10.5
1A_3	wsnp_BE494527A_Ta_2_1	10.5
1A_3	Tdurum_contig15967_90	11.5
1A_3	Tdurum_contig10365_341	11.5
1A_3	Tdurum_contig63715_235	11.5
1A_3	wsnp_BE591290B_Ta_2_7	11.9
1A_3	Excalibur_c73970_243	11.9
1A_3	RAC875_c4190_132	11.9
1A_3	Excalibur_c23598_1632	11.9
1A_3	BobWhite_c44164_151	11.9
1A_3	BobWhite_c44164_402	11.9
1A_3	BobWhite_c46857_82	11.9
1A_3	BS00056547_51	11.9
1A_3	BS00066659_51	11.9
1A_3	BS00072408_51	11.9
1A_3	Excalibur_c11680_81	11.9
1A_3	Excalibur_c16947_114	11.9
1A_3	Excalibur_c35310_375	11.9
1A_3	Excalibur_c66_147	11.9
1A_3	IAAV3695	11.9
1A_3	RAC875_rep_c108284_98	11.9
1A_3	RAC875_rep_c69152_184	11.9
1A_3	RAC875_rep_c71093_1070	11.9
1A_3	TA001430-0733	11.9
1A_3	Tdurum_contig18174_283	11.9
1A_3	Tdurum_contig47345_284	11.9
1A_3	Tdurum_contig78830_348	11.9
1A_3	Tdurum_contig78830_745	11.9
1A_3	Tdurum_contig81011_244	11.9
1A_3	tplb0021i12_383	11.9
1A_3	wsnp_CAP11_c146_160903	11.9
1A_3	wsnp_CAP7_rep_c5385_2417464	11.9
1A_3	wsnp_Ex_c10903_17717179	11.9
1A_3	wsnp_Ex_c13955_21833712	11.9
1A_3	wsnp_Ex_c23598_32826926	11.9
1A_3	wsnp_Ex_c34594_42877119	11.9
1A_3	wsnp_Ex_c34594_42877243	11.9
1A_3	wsnp_Ex_c6488_11266589	11.9
1A_3	wsnp_JD_rep_c49006_33254974	11.9
1A_3	Excalibur_c16947_81	11.9
1A_3	IAAV7352	11.9
1A_3	Kukri_c67703_174	11.9
1A_3	wsnp_Ex_c12399_19776420	11.9
1A_3	IACX2413	11.9
1A_3	RAC875_c21673_641	11.9
1A_3	TA003411-0583	11.9
1A_3	wsnp_Ra_c19637_28840370	11.9
1A_3	CAP7_c4277_191	11.9
1A_3	Ra_c364_50	11.9
1A_3	Tdurum_contig51167_1029	11.9
1A_3	Excalibur_c8599_133	11.9
1A_3	Excalibur_c41553_213	11.9
1A_3	BS00079087_51	11.9
1A_3	Excalibur_c30974_65	11.9
1A_3	JD_c285_1438	11.9
1A_3	Kukri_c19251_236	11.9
1A_3	Kukri_c30924_203	11.9
1A_3	Kukri_c44895_88	11.9
1A_3	wsnp_CAP12_rep_c8598_3608465	11.9
1A_3	BobWhite_c37358_208	11.9
1A_3	CAP12_c3758_112	11.9
1A_3	Excalibur_c1936_1072	11.9
1A_3	Kukri_c2338_533	11.9
1A_3	Kukri_c47131_569	11.9
1A_3	RAC875_c47930_448	11.9
1A_3	RAC875_c7563_273	11.9
1A_3	Tdurum_contig11106_264	11.9
1A_3	Tdurum_contig11106_340	11.9
1A_3	Tdurum_contig13136_605	11.9
1A_3	Tdurum_contig51167_390	11.9
1A_3	Tdurum_contig51167_534	11.9
1A_3	Tdurum_contig51167_810	11.9
1A_3	Tdurum_contig51167_915	11.9
1A_3	Tdurum_contig56662_54	11.9
1A_3	Tdurum_contig8224_378	11.9
1A_3	tplb0031l06_747	11.9
1A_3	wsnp_Ex_c10843_17638629	11.9
1A_3	wsnp_Ex_c19353_28290393	11.9
1A_3	wsnp_Ex_c19353_28290651	11.9
1A_3	wsnp_Ex_c23143_32377033	11.9
1A_3	wsnp_Ex_c7684_13109335	11.9
1A_3	wsnp_Ku_c816_1684613	11.9
1A_3	wsnp_Ra_c4184_7637695	11.9
1A_3	Tdurum_contig80278_250	11.9
1A_3	Tdurum_contig83247_74	11.9
1A_3	IAAV5567	11.9
1A_3	Ku_c4369_351	11.9
1A_3	CAP12_c6629_301	11.9
1A_3	Tdurum_contig62584_770	11.9
1A_3	wsnp_Ex_c41553_48351921	11.9
1A_3	BobWhite_c24825_349	11.9
1A_3	IAAV3156	11.9
1A_3	IAAV3650	11.9
1A_3	IACX1240	11.9
1A_3	JD_c13024_360	11.9
1A_3	RAC875_c60162_129	11.9
1A_3	Tdurum_contig75762_377	11.9
1A_3	Tdurum_contig75762_406	11.9
1A_3	wsnp_JD_c13024_13129681	11.9
1A_3	wsnp_JD_c4904_6034093	11.9
1A_3	JD_c20553_448	12.4
1A_3	Tdurum_contig12152_63	12.4
1A_3	BobWhite_c20553_568	12.4
1A_3	BobWhite_c6820_199	12.4
1A_3	Excalibur_rep_c110054_341	12.4
1A_3	Kukri_c14635_73	12.4
1A_3	Ra_c41164_730	12.4
1A_3	Ra_c5683_1762	12.4
1A_3	Ra_c5683_2584	12.4
1A_3	RAC875_rep_c119761_111	12.4
1A_3	wsnp_Ex_c3264_6017750	12.4
1A_3	wsnp_JD_c20553_18260731	12.4
1A_3	RFL_Contig399_1005	12.4
1A_3	wsnp_JD_c20553_18260620	12.4
1A_3	RAC875_c9386_358	13.8
1A_3	Excalibur_c88792_93	13.8
1A_3	RFL_Contig3683_1784	13.8
1A_3	Excalibur_c88081_143	14.7
1B_1	RAC875_c62503_372	0
1B_1	Excalibur_c43567_913	0
1B_1	BS00068429_51	8.1
1B_1	BobWhite_c2092_519	8.1
1B_1	BS00006820_51	8.1
1B_1	Excalibur_c26496_352	11.3
1B_1	Tdurum_contig58525_304	12.3
1B_1	wsnp_Ex_c1493_2862065	12.8
1B_1	Kukri_c34536_259	13.2
1B_1	BobWhite_c28295_256	13.2
1B_1	Tdurum_contig75546_662	29.9
1B_1	Tdurum_contig75546_247	29.9
1B_1	D_GA8KES402HUUGV_172	36.5
1B_1	Tdurum_contig95782_945	39.3
1B_1	Kukri_c8602_730	39.3
1B_1	Tdurum_contig50667_306	40.2
1B_1	BS00075417_51	65.6
1B_1	Tdurum_contig100292_228	74.1
1B_1	RAC875_rep_c70104_630	74.6
1B_1	Excalibur_rep_c93160_539	75.6
1B_1	Kukri_rep_c75809_213	76.5
1B_1	Tdurum_contig76492_676	77
1B_1	Excalibur_c854_200	77
1B_1	wsnp_Ku_c4373_7947422	77
1B_1	RFL_Contig4520_770	77.5
1B_1	Tdurum_contig9874_547	77.5
1B_1	BS00063263_51	77.5
1B_1	BS00029146_51	77.5
1B_1	RAC875_c13012_1598	77.5
1B_1	IACX7409	77.5
1B_1	Kukri_c33670_506	77.5
1B_1	BS00009699_51	77.5
1B_1	Tdurum_contig55639_241	79.8
1B_1	IAAV2838	79.8
1B_1	BS00012068_51	80.3
1B_1	wsnp_Ra_c19335_28504388	81.2
1B_1	Excalibur_c11264_212	81.2
1B_1	BS00064974_51	81.2
1B_1	BS00064263_51	81.2
1B_1	RFL_Contig4873_542	81.8
1B_1	Kukri_c6409_317	81.8
1B_1	BS00059502_51	81.8
1B_1	BS00063679_51	81.8
1B_1	RAC875_c90169_393	81.8
1B_1	BS00065844_51	83.7
1B_1	Tdurum_contig30113_214	83.7
1B_1	BS00087784_51	84.1
1B_1	Tdurum_contig82187_189	84.6
1B_1	Tdurum_contig11572_931	84.6
1B_1	Kukri_c4376_388	84.6
1B_1	Excalibur_c28016_132	84.6
1B_1	Excalibur_c1886_1288	84.6
1B_1	RFL_Contig1081_570	84.6
1B_1	Kukri_c51268_248	97
1B_1	Tdurum_contig97143_402	103.5
1B_1	BS00062770_51	106
1B_1	tplb0059c20_2221	106
1B_1	BS00063866_51	106
1B_1	BS00047700_51	106
1B_1	BS00022722_51	106
1B_1	Kukri_c78742_122	107.4
1B_1	BobWhite_rep_c66146_237	107.4
1B_1	Kukri_c10308_342	108.3
1B_1	BobWhite_c7333_76	108.8
1B_1	Tdurum_contig7497_570	108.8
1B_1	Tdurum_contig60547_129	108.8
1B_1	RFL_Contig1354_663	108.8
1B_1	GENE-0173_309	108.8
1B_1	BobWhite_c39444_127	108.8
1B_1	Ku_c18793_951	108.8
1B_1	BS00037306_51	108.8
1B_1	wsnp_Ku_c2115_4089288	109.2
1B_1	Ku_c2115_541	109.2
1B_1	BobWhite_c3669_329	109.2
1B_1	RAC875_c8662_547	110.2
1B_1	BS00018461_51	110.2
1B_1	Excalibur_c27675_1815	110.6
1B_1	Tdurum_contig42745_202	113.4
1B_1	Tdurum_contig83096_345	116.2
1B_1	Tdurum_contig83096_388	116.2
1B_1	BS00041968_51	116.2
1B_1	Ex_c4382_1187	117.6
1B_1	RAC875_c42283_686	118.1
1B_1	Tdurum_contig61425_242	118.1
1B_1	Tdurum_contig13405_483	118.1
1B_1	Tdurum_contig6949_697	118.1
1B_1	Tdurum_contig69821_141	118.1
1B_1	BS00064438_51	118.1
1B_1	BS00011465_51	118.1
1B_1	BS00022490_51	118.1
1B_1	IAAV1158	118.1
1B_1	Tdurum_contig47456_430	119.5
1B_1	IAAV1869	119.5
1B_1	BS00062740_51	120.5
1B_1	Excalibur_c39191_82	120.5
1B_1	RAC875_c39721_709	120.9
1B_1	Kukri_c55063_339	120.9
1B_1	Tdurum_contig52053_149	121.4
1B_1	Excalibur_c29029_424	121.4
1B_1	RAC875_c22350_1108	121.4
1B_1	Excalibur_c29127_552	121.9
1B_1	wsnp_BE403956B_Ta_2_3	122.4
1B_1	Excalibur_c74104_623	122.4
1B_1	Tdurum_contig42217_127	122.8
1B_1	Tdurum_contig43910_1113	122.8
1B_1	BS00094498_51	122.8
1B_1	wsnp_BE442716B_Ta_2_2	122.8
1B_1	BS00046966_51	122.8
1B_1	Tdurum_contig10955_429	123.3
1B_1	Kukri_c13968_1342	123.7
1B_1	Excalibur_c57972_116	123.7
1B_1	BobWhite_c11460_291	123.7
1B_1	BS00110149_51	124.2
1B_1	Tdurum_contig61854_1483	124.7
1B_1	Tdurum_contig61854_349	124.7
1B_1	GENE-0045_73	124.7
1B_1	Tdurum_contig61854_831	124.7
1B_1	Tdurum_contig57731_225	125.6
1B_1	BS00071083_51	125.6
1B_1	GENE-3085_533	125.6
1B_1	BobWhite_c32659_301	126.1
1B_1	Kukri_c2871_258	126.1
1B_1	RFL_Contig5496_401	126.1
1B_1	BS00110480_51	126.5
1B_1	Tdurum_contig23640_281	126.5
1B_1	BS00038928_51	126.5
1B_1	Excalibur_rep_c69049_163	127.5
1B_1	BS00011390_51	127.5
1B_1	Kukri_c30661_231	128.4
1B_1	BS00022324_51	128.4
1B_1	TA006157-0542	129.8
1B_1	BS00108497_51	129.8
1B_1	wsnp_Ra_c8484_14372772	129.8
1B_1	wsnp_Ex_rep_c67036_65492436	129.8
1B_1	Tdurum_contig45357_821	129.8
1B_1	Tdurum_contig28668_124	129.8
1B_1	Tdurum_contig10217_1081	130.3
1B_1	RAC875_c38410_95	130.3
1B_1	BS00073132_51	130.3
1B_1	BS00066046_51	130.3
1B_1	Excalibur_c32708_515	133.6
1B_1	RAC875_c6694_906	134.2
1B_1	wsnp_Ra_c23758_33291657	134.2
1B_1	wsnp_Ex_c2025_3799847	134.2
1B_1	Kukri_c51474_334	134.2
1B_1	BobWhite_rep_c66032_270	134.2
1B_1	IAAV5704	134.2
1B_1	wsnp_Ex_rep_c68712_67571580	134.2
1B_1	wsnp_Ex_c34966_43196962	134.2
1B_1	Tdurum_contig34911_118	138.8
1B_1	Tdurum_contig98080_171	139.8
1B_1	RFL_Contig2270_1560	139.8
1B_1	Excalibur_c57881_200	140.2
1B_1	BobWhite_rep_c64758_133	140.2
1B_1	Kukri_c27343_503	140.2
1B_1	Excalibur_c27798_1068	140.2
1B_1	BobWhite_c35520_397	140.2
1B_1	Kukri_c34182_125	140.2
1B_1	IACX1705	140.7
1B_1	BobWhite_c25014_310	140.7
1B_1	wsnp_Ra_c12888_20519578	143
1B_1	RAC875_c46646_549	143
1B_1	BobWhite_rep_c64920_402	143
1B_1	wsnp_Ex_c5388_9527189	143.5
1B_1	CAP7_s12849_67	143.5
1B_1	Excalibur_rep_c105376_485	144
1B_1	BS00076504_51	144
1B_1	BS00067182_51	144
1B_1	wsnp_BE446240B_Ta_2_1	144.4
1B_1	IACX1776	144.4
1B_1	Tdurum_contig28316_228	144.4
1B_1	wsnp_BF428726B_Ta_2_2	157.5
1B_1	RAC875_c60005_82	157.5
1B_1	Excalibur_c72825_291	157.9
1B_1	RAC875_c104178_425	158.4
1B_1	RAC875_rep_c72158_2056	158.4
1B_1	Kukri_c7905_226	158.4
1B_1	CAP12_c2759_111	158.4
1B_1	IAAV2072	158.4
1B_1	BobWhite_c6803_387	158.4
1B_1	BobWhite_c20015_225	158.4
1B_1	BS00022124_51	159.3
1B_1	BobWhite_c15312_405	159.8
1B_1	wsnp_Ku_c21356_31093507	159.8
1B_1	Tdurum_contig50473_889	161.2
1B_1	wsnp_JD_c29939_23694256	162.6
1B_1	Jagger_c6618_144	162.6
1B_1	wsnp_BG274294B_Ta_2_3	176.9
1B_1	TA004596-0276	177.4
1B_1	BS00048610_51	177.8
1B_1	Kukri_c9593_381	178.8
1B_1	GENE-0524_302	179.2
1B_1	Excalibur_c30955_479	179.2
1B_1	Excalibur_c52120_132	180.6
1B_1	wsnp_JD_c35642_26554827	181.1
1B_1	TA004081-0677	181.1
1B_1	GENE-1476_579	181.1
1B_1	BS00086854_51	181.1
1B_1	BS00011274_51	181.1
1B_1	BS00068083_51	181.1
1B_1	BS00069047_51	182.5
1B_1	BS00096719_51	182.5
1B_1	Kukri_c22352_270	182.9
1B_1	Tdurum_contig42755_1086	183.9
1B_1	BobWhite_c48550_198	183.9
1B_1	GENE-0331_314	185.9
1B_1	Tdurum_contig212_133	185.9
1B_1	tplb0059m08_557	185.9
1B_1	Tdurum_contig65046_52	185.9
1B_1	tplb0022m08_325	185.9
1B_1	BS00081395_51	185.9
1B_1	Excalibur_c32411_288	186.4
1B_1	RAC875_c46467_250	187.3
1B_1	Tdurum_contig10097_452	189.6
1B_1	BS00063092_51	192
1B_1	BS00076405_51	192
1B_1	Excalibur_c60931_1260	192
1B_1	BobWhite_c13874_167	192
1B_1	Excalibur_c12994_1060	192
1B_1	RAC875_c55891_712	193.4
1B_1	BS00003934_51	193.4
1B_1	Tdurum_contig57101_1616	193.8
1B_1	RAC875_c45678_1083	193.8
1B_1	Tdurum_contig57101_1160	193.8
1B_1	Excalibur_c14911_466	193.8
1B_1	BS00066071_51	193.8
1B_1	BS00039740_51	195.2
1B_1	D_contig11230_635	196.2
1B_1	Kukri_c7770_176	196.2
1B_1	Tdurum_contig604_71	197.4
1B_1	Tdurum_contig85620_277	197.4
1B_1	BS00075247_51	197.4
1B_1	BS00075248_51	197.4
1B_1	Tdurum_contig52782_382	197.4
1B_1	BobWhite_c1509_622	197.9
1B_1	wsnp_Ex_c21198_30327016	198.3
1B_1	wsnp_Ex_c15611_23929128	198.3
1B_1	wsnp_Ex_c5101_9052671	198.3
1B_1	IAAV4667	198.3
1B_1	BobWhite_c43917_288	198.3
1B_1	wsnp_CAP11_c287_244799	198.3
1B_1	BS00062724_51	198.3
1B_1	BS00063180_51	198.3
1B_1	IAAV420	198.3
1B_1	Kukri_c39698_278	198.3
1B_1	wsnp_RFL_Contig2686_2383517	198.8
1B_1	wsnp_Ex_c7585_12957020	199.3
1B_1	wsnp_Ku_c17017_26019611	199.7
1B_1	RAC875_c1188_531	199.7
1B_1	RAC875_rep_c106876_446	200.7
1B_1	RFL_Contig2484_1065	201.1
1B_1	RAC875_c103613_441	201.1
1B_1	IAAV2683	201.6
1B_1	BobWhite_c14158_112	201.6
1B_1	IACX6346	201.6
1B_1	BS00067627_51	204.4
1B_1	Excalibur_c27915_560	204.8
1B_1	Tdurum_contig13332_1224	206.8
1B_1	BS00022551_51	206.8
1B_1	BS00026338_51	207.7
1B_1	BS00000651_51	207.7
1B_1	BS00066944_51	207.7
1B_1	BobWhite_c15152_341	212.4
1B_1	Excalibur_c12686_105	212.9
1B_1	wsnp_Ku_c30494_40319867	212.9
1B_1	BobWhite_c17644_456	212.9
1B_1	BobWhite_c17644_112	212.9
1B_1	Kukri_c3187_1062	214.3
1B_1	Excalibur_c94658_59	217.6
1B_1	BS00110278_51	219
1B_1	Excalibur_rep_c103592_565	219
1B_1	Excalibur_rep_c103592_955	219
1B_1	Kukri_c8061_98	220.4
1B_1	BS00062607_51	220.4
1B_1	RAC875_c52957_154	223.6
1B_1	Excalibur_c44818_109	223.6
1B_1	Excalibur_rep_c107047_742	224.1
1B_1	IACX646	224.1
1B_1	BS00022775_51	224.1
1B_1	Excalibur_rep_c107047_469	224.1
1B_1	Tdurum_contig56281_261	224.6
1B_1	Kukri_rep_c104113_252	225
1B_1	BobWhite_c2409_1355	225
1B_1	BS00012029_51	225
1B_1	Ku_c8226_762	225
1B_1	TA003586-0637	227
1B_1	IACX906	227
1B_1	BobWhite_c48071_144	227.9
1B_1	BS00022577_51	227.9
1B_1	IACX8280	228.4
1B_1	Tdurum_contig10362_328	228.9
1B_1	RAC875_c78619_523	228.9
1B_1	RAC875_c61512_173	229.8
1B_1	BS00021680_51	231.2
1B_1	BS00022851_51	231.7
1B_1	BobWhite_c34030_646	232.1
1B_1	RFL_Contig2826_1367	232.1
1B_1	BS00067119_51	232.6
1B_1	RAC875_c291_696	233.1
1B_1	BobWhite_rep_c54139_273	251.1
1B_1	BobWhite_c20621_683	251.1
1B_1	BobWhite_c20621_541	251.1
1B_1	wsnp_Ku_c9441_15823265	251.1
1B_1	RAC875_c15190_1089	251.6
1B_1	BS00021938_51	252.1
1B_1	BS00096498_51	252.1
1B_1	BS00023131_51	252.1
1B_1	IACX2961	252.5
1B_1	BS00067526_51	256.3
1B_1	BobWhite_c2027_215	270.3
1B_1	wsnp_Ex_c34765_43024979	270.3
1B_1	BS00068534_51	270.3
1B_1	Tdurum_contig32775_78	271.2
1B_1	BS00069044_51	271.7
1B_1	Excalibur_rep_c67747_629	271.7
1B_1	Excalibur_c96904_336	271.7
1B_1	wsnp_Ku_rep_c107952_93214466	276.9
1B_1	IAAV7428	276.9
1B_1	BS00010392_51	278.3
1B_1	IACX6230	278.3
1B_1	BS00063721_51	278.3
1B_1	Tdurum_contig30664_181	282.2
1B_1	GENE-0163_949	302.9
1B_1	BobWhite_c39901_338	302.9
1B_1	RAC875_rep_c111494_195	302.9
1B_1	GENE-0129_110	302.9
1B_1	GENE-0129_190	302.9
1B_1	GENE-0129_214	302.9
1B_1	BS00075130_51	302.9
1B_1	TA004059-0492	303.4
1B_1	Excalibur_c7684_509	307.1
1B_1	CAP12_c590_307	307.1
1B_1	wsnp_Ex_c4774_8519623	307.1
1B_1	Kukri_rep_c102001_59	312.7
1B_1	Excalibur_rep_c71107_517	312.7
1B_1	RAC875_rep_c104133_703	312.7
1B_1	wsnp_Ra_c53181_56932563	315
1B_1	Excalibur_c88292_114	317.3
1B_1	RAC875_c11491_739	317.3
1B_1	GENE-0568_419	317.3
1B_1	GENE-0568_112	317.3
1B_1	BS00028747_51	318.8
1B_1	GENE-0115_375	318.8
1B_1	BobWhite_c6664_386	318.8
1B_1	Tdurum_contig81355_72	318.8
1B_1	Kukri_rep_c103550_213	323.5
1B_1	BobWhite_c8293_236	323.5
1B_1	wsnp_CAP11_rep_c4138_1957291	323.5
1B_1	CAP8_c3752_330	323.5
1B_2	BS00060686_51	0
1B_2	Kukri_c46030_412	14.3
1B_2	Excalibur_rep_c113950_132	14.8
1B_2	BS00010669_51	15.7
1B_2	Tdurum_contig10099_538	16.6
1B_2	Excalibur_c55186_351	16.6
1B_2	wsnp_Ku_c26281_36243489	17.1
1B_2	BS00010807_51	17.1
1B_2	BobWhite_rep_c62955_567	17.1
1B_2	RAC875_c26801_179	19
1B_2	RAC875_c26801_129	19
1B_2	IACX9428	19.4
1B_2	Ku_c11537_539	19.9
1B_2	BS00082577_51	19.9
1B_2	wsnp_Ku_c11807_19204597	20.8
1B_2	Tdurum_contig48103_1481	21.3
1B_2	Tdurum_contig60566_269	21.3
1B_2	Tdurum_contig9144_222	21.8
1B_2	RAC875_c37075_283	22.2
1B_2	BS00064948_51	23.6
1B_2	BobWhite_c34379_178	23.6
1B_2	RAC875_c5882_307	24.1
2A_1	wsnp_Ex_c2772_5130007	0
2A_1	RAC875_c16656_406	0.5
2A_1	Excalibur_rep_c76441_163	0.5
2A_1	Tdurum_contig11802_864	0.9
2A_1	Excalibur_c24355_358	0.9
2A_1	RAC875_c7915_1863	0.9
2A_1	Kukri_rep_c109912_394	0.9
2A_1	IAAV32	0.9
2A_1	D_contig02411_248	0.9
2A_1	Tdurum_contig11802_921	0.9
2A_1	BS00105593_51	4.5
2A_1	RFL_Contig4030_493	5.9
2A_1	Kukri_c22152_730	7.3
2A_1	wsnp_Ex_c11950_19164041	7.8
2A_1	Kukri_c22152_1059	7.8
2A_1	wsnp_Ex_c11950_19164191	7.8
2A_1	Excalibur_c7682_652	9.2
2A_1	BS00064392_51	9.7
2A_1	Kukri_c17467_2711	9.7
2A_1	wsnp_Ex_c997_1906900	9.7
2A_1	wsnp_Ku_c33374_42877546	9.7
2A_1	Kukri_c33374_1048	9.7
2A_1	TA002254-0660	10.1
2A_1	Kukri_c12825_627	10.1
2A_1	Tdurum_contig26711_578	10.1
2A_1	Kukri_c54013_632	10.1
2A_1	Kukri_c3249_263	10.1
2A_1	Kukri_c31776_1621	10.1
2A_1	Excalibur_c29231_932	10.1
2A_1	RAC875_c63018_441	10.1
2A_1	Excalibur_c12980_2621	10.1
2A_1	Excalibur_c29231_890	10.1
2A_1	Tdurum_contig8121_132	10.1
2A_1	BobWhite_c19945_341	10.1
2A_1	BS00072058_51	10.1
2A_1	Excalibur_c39189_510	10.1
2A_1	Excalibur_s113791_202	10.1
2A_1	Excalibur_c9656_170	10.1
2A_1	TA002014-1062	10.1
2A_1	Excalibur_c18324_297	10.1
2A_1	Excalibur_c25599_358	10.1
2A_1	Kukri_c46542_1015	10.1
2A_1	TA002014-0997	10.1
2A_1	TA002095-0637	10.1
2A_1	tplb0032i02_1388	10.1
2A_1	Excalibur_c17946_237	10.6
2A_1	BobWhite_c10673_138	11.1
2A_1	Tdurum_contig48835_437	11.1
2A_1	D_contig46934_77	11.1
2A_1	BobWhite_c10673_330	11.1
2A_1	BobWhite_rep_c63376_215	11.1
2A_1	IAAV8167	11.1
2A_1	BobWhite_c26803_89	11.1
2A_1	Tdurum_contig48009_99	13.4
2A_1	Kukri_c36139_292	14.9
2A_1	Tdurum_contig81115_133	14.9
2A_1	Tdurum_contig29895_242	14.9
2A_1	Tdurum_contig69643_287	14.9
2A_1	RAC875_c1125_578	14.9
2A_1	Tdurum_contig15438_231	18.6
2A_1	RAC875_c47161_142	18.6
2A_1	Kukri_c102346_668	19.1
2A_1	BobWhite_c2512_1588	19.1
2A_1	Tdurum_contig63516_381	19.6
2A_1	Tdurum_contig63516_497	19.6
2A_1	Kukri_c11809_824	21.9
2A_1	Kukri_c833_345	21.9
2A_1	RAC875_c829_611	21.9
2A_1	BS00067342_51	22.4
2A_1	tplb0049o19_694	22.4
2A_1	Tdurum_contig28712_190	22.4
2A_1	wsnp_RFL_Contig3790_4082085	22.8
2A_2	IAAV733	0
2A_2	RAC875_rep_c70093_1079	0
2A_2	Tdurum_contig9070_142	0
2A_2	wsnp_CAP11_rep_c8768_3788007	0
2A_2	wsnp_CAP12_c901_472535	0
2A_2	wsnp_Ex_c15325_23565794	0
2A_2	wsnp_JD_c12088_12411845	0
2A_2	wsnp_BE497494A_Td_2_2	0
2A_2	BS00079443_51	0.4
2A_2	Kukri_c24852_466	0.4
2A_2	Kukri_c40035_258	0.4
2A_2	RAC875_c24517_558	0.4
2A_2	RAC875_rep_c73925_276	0.4
2A_2	Kukri_rep_c90581_382	0.4
2A_2	BS00064887_51	3.7
2A_2	Excalibur_c6808_959	3.7
2A_2	BobWhite_c14476_80	4.6
2A_2	Ex_c721_2127	4.6
2A_2	Ex_c721_2374	4.6
2A_2	IACX6028	4.6
2A_2	RFL_Contig1512_1420	4.6
2A_2	RFL_Contig5917_2369	4.6
2A_2	wsnp_Ex_c36242_44232473	4.6
2A_2	wsnp_Ex_c41913_48628389	4.6
2A_2	GENE-1220_457	5.1
2A_2	Tdurum_contig56511_144	6
2A_2	Tdurum_contig64391_231	6
2A_2	Kukri_c10860_1283	6
2A_2	Kukri_c7139_1248	6.5
2A_2	Excalibur_c4847_631	6.9
2A_2	Ex_c4847_236	6.9
2A_2	BobWhite_c12252_476	6.9
2A_2	BS00074780_51	6.9
2A_2	BS00107555_51	6.9
2A_2	Excalibur_c50934_159	6.9
2A_2	Excalibur_c74304_642	6.9
2A_2	Kukri_rep_c105404_235	6.9
2A_2	Tdurum_contig15512_407	6.9
2A_2	Tdurum_contig15512_429	6.9
2A_2	BobWhite_c3644_491	7.4
2A_2	Kukri_c29034_801	7.4
2A_2	Kukri_c29034_867	7.4
2A_2	wsnp_RFL_Contig3604_3795252	7.9
2A_2	TA005685-0854	7.9
2A_2	Excalibur_c28938_185	7.9
2A_2	Excalibur_c31878_70	7.9
2A_2	IACX636	7.9
2A_2	Tdurum_contig44062_733	7.9
2A_2	Kukri_c27512_231	8.3
2A_2	CAP12_rep_c8708_260	8.3
2A_2	Excalibur_c46968_508	8.3
2A_2	Excalibur_c51133_246	8.3
2A_2	Tdurum_contig30569_579	8.3
2A_2	wsnp_Ex_c12219_19526749	8.3
2A_2	Excalibur_c59292_231	8.3
2A_2	GENE-2904_757	8.3
2A_2	Excalibur_c18279_1219	8.3
2A_2	wsnp_Ex_rep_c69124_68035904	8.3
2A_2	wsnp_Ku_rep_c102140_89178676	8.3
2A_2	BobWhite_rep_c62964_459	8.3
2A_2	BobWhite_rep_c62964_873	8.3
2A_2	BS00090940_51	8.3
2A_2	Excalibur_c23723_373	8.3
2A_2	Kukri_rep_c107604_76	8.3
2A_2	RAC875_c58503_182	8.3
2A_2	RFL_Contig1139_602	8.3
2A_2	TA002893-0825	8.3
2A_2	BobWhite_c14530_51	8.3
2A_2	BobWhite_c26259_248	8.3
2A_2	BobWhite_c32236_139	8.3
2A_2	BobWhite_c35700_56	8.3
2A_2	BobWhite_c5562_219	8.3
2A_2	BobWhite_rep_c64680_305	8.3
2A_2	Excalibur_c21269_176	8.3
2A_2	Excalibur_c21872_135	8.3
2A_2	Excalibur_c34839_187	8.3
2A_2	GENE-0845_190	8.3
2A_2	GENE-1031_48	8.3
2A_2	Kukri_c44997_377	8.3
2A_2	Kukri_c45015_145	8.3
2A_2	Kukri_c45015_363	8.3
2A_2	Kukri_c45411_223	8.3
2A_2	Kukri_rep_c100955_214	8.3
2A_2	RAC875_c17628_867	8.3
2A_2	RAC875_rep_c119471_174	8.3
2A_2	TA003045-1227	8.3
2A_2	Tdurum_contig28682_120	8.3
2A_2	Tdurum_contig30569_126	8.3
2A_2	Tdurum_contig45580_1717	8.3
2A_2	Tdurum_contig45580_2786	8.3
2A_2	Tdurum_contig45580_3981	8.3
2A_2	Tdurum_contig62073_376	8.3
2A_2	Tdurum_contig62073_631	8.3
2A_2	Tdurum_contig62976_84	8.3
2A_2	Tdurum_contig93884_223	8.3
2A_2	tplb0059a15_417	8.3
2A_2	wsnp_BE517877A_Td_2_3	8.3
2A_2	wsnp_BF201533A_Ta_2_3	8.3
2A_2	wsnp_CD453913A_Ta_2_1	8.3
2A_2	wsnp_Ex_c1767_3341220	8.3
2A_2	wsnp_Ex_c62844_62315607	8.3
2A_2	wsnp_Ex_rep_c101866_87158671	8.3
2A_2	wsnp_Ex_rep_c66448_64683704	8.3
2A_2	wsnp_JG_c926_520103	8.3
2A_2	wsnp_Ku_c6826_11860405	8.3
2A_2	wsnp_Ex_c1782_3365844	8.3
2A_2	Excalibur_c637_1078	8.3
2A_2	GENE-4359_59	8.3
2A_2	TA004478-0271	8.3
2A_2	wsnp_BE498730A_Ta_2_2	8.3
2A_2	Excalibur_c59560_796	8.3
2A_2	Kukri_rep_c101016_905	8.8
2A_2	Excalibur_c11398_913	9.3
2A_2	IAAV263	9.7
2A_2	JD_c2020_434	9.7
2A_2	Tdurum_contig47103_94	9.7
2A_2	Tdurum_contig10750_958	10.2
2A_2	BobWhite_c46780_84	10.2
2A_2	Excalibur_c56792_131	10.2
2A_2	Kukri_c22553_60	10.2
2A_2	Kukri_rep_c108875_85	10.2
2A_2	wsnp_CAP12_c948_496702	10.2
2A_2	BobWhite_rep_c50828_195	10.2
2A_2	Kukri_rep_c101874_104	10.7
2A_2	RAC875_rep_c89170_572	11.6
2A_2	Kukri_c7169_105	11.6
2A_2	Tdurum_contig33419_124	11.6
2A_2	Tdurum_contig33419_337	11.6
2A_2	Tdurum_contig93152_81	11.6
2A_2	Excalibur_c6027_1035	12.1
2A_2	Tdurum_contig10696_458	12.1
2A_2	Tdurum_contig42331_2843	12.1
2A_2	Tdurum_contig55145_180	12.1
2A_2	Tdurum_contig27887_55	13.9
2A_2	TA001351-1193	13.9
2A_2	BobWhite_c10015_641	13.9
2A_2	BobWhite_c2532_966	13.9
2A_2	BS00024115_51	13.9
2A_2	Excalibur_c27210_183	13.9
2A_2	GENE-1181_262	13.9
2A_2	GENE-1181_694	13.9
2A_2	GENE-1319_146	13.9
2A_2	GENE-1342_238	13.9
2A_2	Kukri_c14611_315	13.9
2A_2	RAC875_rep_c74200_1415	13.9
2A_2	TA011854-0699	13.9
2A_2	wsnp_BG607088A_Ta_1_1	13.9
2A_2	wsnp_CAP11_c1787_968410	13.9
2A_2	BS00089457_51	15.3
2A_2	GENE-1028_694	15.3
2A_2	Tdurum_contig10385_477	21.9
2A_2	Tdurum_contig59369_133	23.8
2A_2	Excalibur_c4978_605	24.2
2A_2	Tdurum_contig61689_135	24.2
2A_2	Tdurum_contig10910_713	24.2
2A_2	Tdurum_contig4781_1198	24.2
2A_2	Tdurum_contig5094_505	24.2
2A_2	Tdurum_contig62559_146	24.2
2A_2	Excalibur_c65611_463	24.7
2A_2	Kukri_c57491_132	24.7
2A_2	Kukri_c57491_156	24.7
2A_2	tplb0034a02_612	25.2
2A_2	wsnp_Ex_rep_c66809_65185215	25.2
2A_2	wsnp_Ex_rep_c66809_65184970	25.6
2A_2	TA001775-0903	25.6
2A_2	Tdurum_contig31316_197	31.3
2A_2	Tdurum_contig13957_866	34.1
2A_2	Tdurum_contig13957_864	34.1
2A_2	TA001993-0199	34.6
2A_2	CAP7_c2791_231	37
2A_2	BobWhite_c41527_201	37.4
2A_2	RFL_Contig852_4295	37.4
2A_2	wsnp_CAP11_c838_518859	37.4
2A_2	RAC875_c6156_428	37.9
2A_2	Tdurum_contig12589_325	37.9
2A_2	Tdurum_contig50824_58	38.4
2A_2	Tdurum_contig11021_100	38.9
2A_2	wsnp_Ex_c32910_41489631	45.6
2A_2	Kukri_c57078_153	45.6
2A_2	Tdurum_contig42540_843	50.9
2A_3	CAP7_c1862_460	0
2A_3	wsnp_RFL_Contig2763_2509104	0.4
2A_3	Excalibur_c14953_899	0.4
2A_3	wsnp_Ex_c14953_23104041	0.4
2A_3	GENE-1908_331	2.8
2A_3	BS00057059_51	3.7
2A_3	BS00057060_51	3.7
2A_3	BS00067907_51	3.7
2A_3	BS00023048_51	17.5
2A_3	Kukri_c22047_313	17.5
2A_3	Excalibur_c7665_260	18
2A_3	RAC875_rep_c69619_145	18
2A_3	RAC875_rep_c69619_78	18
2A_3	wsnp_CAP11_c1711_934478	18
2A_3	wsnp_Ex_c41007_47932833	18
2A_3	wsnp_Ex_rep_c102390_87572532	18
2A_3	Kukri_c52402_292	18
2A_3	wsnp_Ku_c33884_43306422	18
2A_3	BS00012298_51	19.8
2A_3	tplb0046b02_872	20.8
2A_3	BS00108865_51	20.8
2A_3	RAC875_c19904_308	20.8
2A_3	RAC875_c104160_61	20.8
2A_3	Tdurum_contig4976_1138	26.3
2A_3	Tdurum_contig60205_509	26.3
2A_3	Tdurum_contig60205_644	26.3
2A_3	Tdurum_contig60205_806	26.3
2A_3	Tdurum_contig93508_119	26.3
2A_3	Tdurum_contig93508_295	26.3
2A_3	wsnp_Ex_c15681_24016359	26.3
2A_3	wsnp_Ex_c45_97816	26.3
2A_3	wsnp_Ex_c45_98113	26.3
2A_3	wsnp_Ex_c15681_24015996	26.3
2A_3	Tdurum_contig60298_219	26.3
2A_3	Tdurum_contig60298_468	26.3
2A_3	Tdurum_contig45661_684	26.8
2A_3	RAC875_c33037_578	31
2A_3	BS00003663_51	32
2A_3	IACX5800	32
2A_3	Tdurum_contig31185_456	32.9
2A_3	BS00023144_51	34.3
2A_3	Excalibur_c44487_642	34.3
2A_3	IAAV3791	34.3
2A_3	Tdurum_contig44139_1033	34.3
2A_3	Tdurum_contig13876_311	37.6
2A_3	Tdurum_contig8926_1118	37.6
2A_3	Tdurum_contig63071_132	38.1
2A_3	BS00022496_51	38.1
2A_3	Kukri_c42972_148	38.1
2A_3	Tdurum_contig63071_67	38.1
2A_3	Tdurum_contig84245_154	38.1
2A_3	BS00030365_51	38.1
2A_3	BobWhite_c31163_694	38.6
2A_3	BS00062732_51	38.6
2A_3	IACX3245	38.6
2A_3	Kukri_c15615_254	38.6
2A_3	RFL_Contig927_1591	38.6
2A_3	Tdurum_contig82404_354	38.6
2A_3	BS00000209_51	38.6
2A_3	BobWhite_c18287_502	38.6
2A_3	BS00110516_51	38.6
2A_3	BS00000250_51	38.6
2A_3	Excalibur_c64568_149	38.6
2A_3	TA004785-1734	39.5
2A_3	IACX4345	40
2A_3	Tdurum_contig9212_1404	40.5
2A_3	CAP7_c4056_108	40.5
2A_3	Tdurum_contig86243_288	40.5
2A_3	BobWhite_c5178_188	40.5
2A_3	BS00023202_51	40.5
2A_3	Excalibur_rep_c110586_1083	40.5
2A_3	Tdurum_contig9212_1109	40.5
2A_3	Tdurum_contig9212_1196	40.5
2A_3	Tdurum_contig9212_1287	40.5
2A_3	Tdurum_contig9212_182	40.5
2A_3	Tdurum_contig9212_230	40.5
2A_3	Tdurum_contig9212_392	40.5
2A_3	Tdurum_contig9212_527	40.5
2A_3	Tdurum_contig9212_83	40.5
2A_3	BobWhite_c37402_506	40.5
2A_3	Tdurum_contig9212_1094	40.5
2A_3	wsnp_JD_c13946_13810300	40.5
2A_3	BS00066409_51	40.5
2A_3	BobWhite_c37402_482	40.5
2A_3	Excalibur_c72359_56	40.5
2A_3	BS00064324_51	40.9
2A_3	Excalibur_c35919_107	42.9
2A_3	BS00023075_51	42.9
2A_3	Tdurum_contig47508_250	42.9
2A_3	Excalibur_c517_405	42.9
2A_3	BS00063368_51	43.3
2A_3	wsnp_Ex_c14639_22695091	45.3
2A_3	Excalibur_c44834_80	45.8
2A_3	RAC875_c21750_784	45.8
2A_3	Ra_c13654_1529	46.2
2A_3	wsnp_Ku_c4045_7380115	46.2
2A_3	wsnp_Ku_c26323_36285601	46.2
2A_3	BobWhite_c42181_327	46.2
2A_3	BS00071350_51	46.2
2A_3	Excalibur_c39151_104	46.2
2A_3	wsnp_Ku_c26323_36285697	46.2
2A_3	wsnp_BE498892A_Ta_2_25	47.9
2A_3	BobWhite_c16248_382	47.9
2A_3	Tdurum_contig8350_243	47.9
2A_3	wsnp_Ex_c3695_6740111	47.9
2A_3	Tdurum_contig52350_588	47.9
2A_3	Tdurum_contig50720_354	47.9
2A_3	BS00010477_51	47.9
2A_3	BS00097473_51	47.9
2A_3	CAP12_c1380_238	47.9
2A_3	Excalibur_c62106_387	47.9
2A_3	IAAV4880	47.9
2A_3	IAAV5232	47.9
2A_3	Kukri_c11099_1198	47.9
2A_3	Kukri_c44231_1576	47.9
2A_3	Tdurum_contig50720_204	47.9
2A_3	Tdurum_contig50720_482	47.9
2A_3	Tdurum_contig52350_296	47.9
2A_3	Tdurum_contig52350_902	47.9
2A_3	Tdurum_contig56321_179	47.9
2A_3	Tdurum_contig56321_232	47.9
2A_3	wsnp_Ex_c10555_17236072	47.9
2A_3	wsnp_Ku_c16547_25454123	47.9
2A_3	wsnp_Ku_c2838_5354231	47.9
2A_3	BS00077504_51	47.9
2A_3	Kukri_c21008_657	47.9
2A_3	Kukri_c25632_86	47.9
2A_3	RAC875_c22328_1356	47.9
2A_3	Tdurum_contig9224_402	47.9
2A_3	Tdurum_contig92425_3144	47.9
2A_3	Tdurum_contig42282_11463	47.9
2A_3	tplb0025l18_1788	47.9
2A_3	Tdurum_contig42282_10323	47.9
2A_3	wsnp_BE498892A_Ta_2_1	47.9
2A_3	Tdurum_contig53038_1287	47.9
2A_3	Excalibur_c7971_712	47.9
2A_3	wsnp_Ku_c2838_5355065	47.9
2A_3	BS00087932_51	47.9
2A_3	RAC875_c35688_382	47.9
2A_3	tplb0021g21_595	47.9
2A_3	RAC875_c68651_391	47.9
2A_3	Ra_c2467_333	47.9
2A_3	wsnp_Ex_c905_1748920	47.9
2A_3	Ku_c10387_272	47.9
2A_3	Ex_c36309_435	47.9
2A_3	Excalibur_c17000_557	47.9
2A_3	Excalibur_c923_837	47.9
2A_3	Ku_c72620_132	47.9
2A_3	Excalibur_c91176_326	47.9
2A_3	Tdurum_contig12556_183	47.9
2A_3	RAC875_c34370_332	47.9
2A_3	RAC875_rep_c108836_55	47.9
2A_3	RFL_Contig5122_974	47.9
2A_3	RAC875_c1043_258	47.9
2A_3	RAC875_c96399_610	47.9
2A_3	Tdurum_contig16904_167	47.9
2A_3	BS00087929_51	47.9
2A_3	Tdurum_contig92425_224	50.5
2A_3	Tdurum_contig92425_431	50.5
2A_3	Tdurum_contig92425_1324	50.5
2A_3	Tdurum_contig92425_1919	50.5
2A_3	Jagger_c295_58	50.5
2A_3	wsnp_BG313362A_Ta_2_1	50.5
2A_3	GENE-1304_388	50.5
2A_3	RAC875_c32086_65	50.5
2A_3	Excalibur_c12675_1666	50.5
2A_3	Excalibur_c21117_300	50.5
2A_3	wsnp_JD_c1872_2603061	50.5
2A_3	wsnp_JD_c289_450995	50.5
2A_3	BobWhite_c18105_52	50.5
2A_3	Tdurum_contig92425_908	50.5
2A_3	Tdurum_contig92425_801	50.5
2A_3	Tdurum_contig92425_1612	50.5
2A_3	Tdurum_contig92425_992	50.5
2A_3	Tdurum_contig92425_296	50.5
2A_3	Tdurum_contig27985_444	51.4
2A_3	BS00022252_51	51.9
2A_3	Tdurum_contig64286_182	51.9
2A_3	RAC875_c22214_142	51.9
2A_3	Kukri_c36985_104	51.9
2A_3	BS00007689_51	51.9
2A_3	Tdurum_contig64286_268	51.9
2A_3	BS00072914_51	51.9
2A_3	Ex_c42184_708	55.5
2A_3	GENE-0361_486	55.5
2A_3	RAC875_c24364_526	55.5
2A_3	BS00022510_51	55.5
2A_3	RAC875_c35873_1828	55.5
2A_3	D_contig24918_195	55.5
2A_3	BS00022287_51	55.5
2A_3	GENE-0361_416	55.5
2A_3	Kukri_c82715_166	55.5
2A_3	RAC875_c23324_1081	55.5
2A_3	BS00101944_51	55.5
2A_3	IAAV2847	55.5
2A_3	RAC875_c63917_698	55.5
2A_3	RAC875_c68649_457	55.5
2A_3	wsnp_Ex_rep_c66356_64538896	55.5
2A_3	Excalibur_c16232_615	55.5
2A_3	BobWhite_c1477_315	55.5
2A_3	BS00022467_51	55.5
2A_3	BS00082153_51	55.5
2A_3	RAC875_c21405_591	55.5
2A_3	wsnp_JD_c30_49876	55.5
2A_3	BS00012328_51	55.5
2A_3	Excalibur_c24213_314	55.5
2A_3	TA001453-0801	55.5
2A_3	BS00068141_51	55.5
2A_3	Kukri_c23400_362	55.5
2A_3	Kukri_rep_c68187_743	55.5
2A_3	Excalibur_c28710_490	55.5
2A_3	Kukri_c1621_107	55.5
2A_3	Tdurum_contig42029_2929	55.5
2A_3	Kukri_c38212_468	55.5
2A_3	wsnp_Ku_c850_1758318	55.5
2A_3	wsnp_Ku_c8746_14803911	55.5
2A_3	Kukri_c5276_801	55.5
2A_3	Excalibur_c58231_273	55.5
2A_3	Tdurum_contig41912_893	55.5
2A_3	Excalibur_c49266_154	55.5
2A_3	Excalibur_c56844_54	55.5
2A_3	CAP8_c5840_208	55.5
2A_3	RFL_Contig2981_1111	55.5
2A_3	Excalibur_rep_c102984_157	55.5
2A_3	BS00010729_51	55.5
2A_3	BS00076039_51	55.5
2A_3	BS00022923_51	55.5
2A_3	BS00022925_51	55.5
2A_3	BS00065380_51	55.5
2A_3	BS00070466_51	55.5
2A_3	CAP12_rep_c6900_73	55.5
2A_3	Ex_c6937_1992	55.5
2A_3	Excalibur_c37167_266	55.5
2A_3	GENE-2383_730	55.5
2A_3	Ku_c7283_915	55.5
2A_3	Kukri_c100591_287	55.5
2A_3	Kukri_rep_c68068_95	55.5
2A_3	RAC875_c42539_104	55.5
2A_3	RAC875_rep_c69411_672	55.5
2A_3	TA001167-0831	55.5
2A_3	Tdurum_contig32203_281	55.5
2A_3	Tdurum_contig42600_527	55.5
2A_3	tplb0060e06_1793	55.5
2A_3	wsnp_Ex_c2311_4327681	55.5
2A_3	wsnp_Ex_c3964_7181151	55.5
2A_3	wsnp_Ex_c53729_56868062	55.5
2A_3	wsnp_Ex_c62466_62094459	55.5
2A_3	wsnp_Ex_c63909_62932437	55.5
2A_3	wsnp_JD_c16948_15934352	55.5
2A_3	Kukri_c3688_407	55.5
2A_3	RAC875_c104604_86	55.5
2A_3	wsnp_JD_c30_49073	55.5
2A_3	Kukri_c35516_93	55.5
2A_3	BobWhite_c11479_157	55.5
2A_3	Kukri_c498_1817	55.5
2A_3	Kukri_c38212_427	55.5
2A_3	BS00064836_51	55.5
2A_3	Excalibur_c1999_1451	55.5
2A_3	GENE-0676_322	55.5
2A_3	IAAV3805	55.5
2A_3	Kukri_rep_c80115_213	55.5
2A_3	wsnp_Ex_c63909_62932669	55.5
2A_3	wsnp_Ex_c63909_62932893	55.5
2A_3	BobWhite_c1105_299	55.5
2A_3	BS00021676_51	55.5
2A_3	RFL_Contig4560_1503	55.5
2A_3	wsnp_Ku_c3688_6797159	55.5
2A_3	BS00069105_51	55.5
2A_3	BS00107649_51	56.9
2A_3	BS00032383_51	57.9
2A_3	CAP7_c2947_355	59.5
2A_3	Kukri_c12849_1392	61.6
2A_3	BS00020869_51	61.6
2A_3	D_GA8KES402JXTFV_102	65.2
2A_3	wsnp_RFL_Contig2324_1803878	72.9
2A_3	Excalibur_c12971_464	72.9
2A_3	Excalibur_c1408_509	73.4
2A_3	TA004710-0394	73.8
2A_3	Ku_c25908_277	74.3
2A_3	Tdurum_contig70471_308	75.3
2A_3	BobWhite_c923_208	81
2B_1	BobWhite_c12144_216	0
2B_1	Kukri_c3701_330	0
2B_1	tplb0054d13_2445	0
2B_1	BS00099465_51	0
2B_1	Kukri_c3701_1980	0
2B_1	Tdurum_contig11802_583	0
2B_1	BobWhite_c11397_231	0
2B_1	Kukri_c19266_779	0
2B_1	BobWhite_c20346_138	0
2B_1	RAC875_c5347_474	0
2B_1	BS00022665_51	2.3
2B_1	Excalibur_c17250_104	2.3
2B_1	RAC875_c35090_398	2.3
2B_1	RAC875_c65386_72	2.3
2B_1	Excalibur_c17250_592	2.3
2B_1	Excalibur_c17250_751	2.3
2B_1	BS00028028_51	2.3
2B_1	Kukri_rep_c97239_133	2.3
2B_1	Excalibur_c39493_251	2.3
2B_1	Kukri_rep_c110389_569	7
2B_1	RAC875_rep_c71112_400	7
2B_1	Ra_c491_902	10.2
2B_1	wsnp_Ex_c1996_3754394	10.2
2B_1	Ra_c2544_1566	10.2
2B_1	Ra_c11464_294	10.2
2B_1	RAC875_rep_c109471_154	10.2
2B_1	wsnp_Ra_rep_c106727_90434958	10.2
2B_1	Tdurum_contig12711_252	21.6
2B_1	IAAV8700	21.6
2B_1	Tdurum_contig49144_321	21.6
2B_1	BS00043055_51	22.1
2B_1	BS00085748_51	22.1
2B_1	BS00086109_51	22.1
2B_1	BS00100466_51	22.1
2B_1	Kukri_c12804_620	22.1
2B_1	Kukri_c22513_1780	22.1
2B_1	Excalibur_c1787_1037	22.1
2B_1	wsnp_Ex_c18354_27181431	22.1
2B_1	Excalibur_c22179_206	22.1
2B_1	Excalibur_c841_609	22.1
2B_1	Tdurum_contig54649_915	22.1
2B_1	BS00044806_51	22.1
2B_1	BobWhite_c15035_469	22.1
2B_1	BS00013534_51	22.1
2B_1	Excalibur_c22179_119	22.1
2B_1	Excalibur_c8093_82	22.1
2B_1	Kukri_c16758_443	22.1
2B_1	Kukri_c41556_619	22.1
2B_1	Kukri_rep_c92967_369	22.1
2B_1	RAC875_rep_c69222_996	22.1
2B_1	Tdurum_contig12711_264	22.1
2B_1	Tdurum_contig51145_187	22.1
2B_1	Tdurum_contig51145_476	22.1
2B_1	Tdurum_contig54649_798	22.1
2B_1	Tdurum_contig93602_268	22.1
2B_1	Tdurum_contig93602_338	22.1
2B_1	wsnp_Ex_c18354_27181086	22.1
2B_1	BS00110996_51	23
2B_1	Excalibur_c42928_135	23
2B_1	Kukri_c56081_307	23
2B_1	RAC875_c2698_132	23
2B_1	Excalibur_c30167_243	23.5
2B_1	Excalibur_c30167_531	23.5
2B_1	RAC875_c4331_1627	23.5
2B_1	Tdurum_contig44328_68	23.5
2B_1	Tdurum_contig44328_448	23.5
2B_1	Excalibur_c19499_948	23.5
2B_1	Tdurum_contig41920_93	30.5
2B_1	RAC875_c38003_164	35.1
2B_1	BobWhite_c39184_140	35.1
2B_1	GENE-1711_923	35.1
2B_1	D_F5XZDLF01CFO7W_135	36.5
2B_1	BS00010318_51	36.9
2B_1	BS00070900_51	36.9
2B_1	BS00072619_51	37.9
2B_1	BS00070051_51	37.9
2B_1	BS00072620_51	37.9
2B_1	BS00070050_51	37.9
2B_1	Tdurum_contig47816_258	51.1
2B_2	Excalibur_c10376_375	0
2B_2	Excalibur_c9093_1469	0
2B_2	Excalibur_rep_c102844_573	0
2B_2	Tdurum_contig6194_1186	0
2B_2	Tdurum_contig6194_412	0
2B_2	Tdurum_contig6194_931	0
2B_2	Tdurum_contig6194_985	0
2B_2	Excalibur_c10376_313	0
2B_2	Excalibur_rep_c105343_349	0
2B_2	Kukri_c29074_303	0
2B_2	RAC875_c15229_108	0
2B_2	RAC875_c26469_363	0
2B_2	RAC875_c61801_262	0
2B_2	RAC875_c61801_299	0
2B_2	Tdurum_contig12336_489	0
2B_2	Excalibur_c25234_143	0.4
2B_2	Excalibur_c6502_397	0.4
2B_2	RAC875_c34516_70	0.4
2B_2	BobWhite_c47608_304	0.4
2B_2	BobWhite_c47608_273	0.4
2B_2	Ku_c5725_892	1.8
2B_2	Kukri_rep_c107572_121	1.8
2B_2	Tdurum_contig9716_1460	1.8
2B_2	Tdurum_contig9716_229	1.8
2B_2	Tdurum_contig9716_2337	1.8
2B_2	Tdurum_contig9716_535	1.8
2B_2	Tdurum_contig9716_553	1.8
2B_2	GENE-0647_106	3.7
2B_2	Tdurum_contig30680_120	3.7
2B_2	Tdurum_contig45255_3491	3.7
2B_2	RAC875_c24914_423	4.6
2B_2	RAC875_c24914_462	4.6
2B_2	BobWhite_c44986_217	4.6
2B_2	Kukri_c2565_1405	4.6
2B_2	Kukri_c59585_560	4.6
2B_2	Kukri_rep_c101093_572	4.6
2B_2	RAC875_c22619_364	4.6
2B_2	wsnp_Ex_c6099_10674406	4.6
2B_2	wsnp_Ex_c6099_10674508	4.6
2B_2	wsnp_Ra_c8489_14382125	4.6
2B_2	Tdurum_contig5056_173	5.1
2B_2	RAC875_c54310_928	5.1
2B_2	Kukri_c12368_82	5.1
2B_2	Kukri_rep_c117487_285	5.1
2B_2	Kukri_rep_c69803_82	5.1
2B_2	RAC875_c62278_69	5.1
2B_2	Tdurum_contig45255_3473	5.1
2B_2	RAC875_c22429_249	6.2
2B_2	CAP12_rep_c5926_115	8.5
2B_2	CAP12_rep_c5926_51	8.5
2B_2	D_contig36671_269	8.5
2B_2	Excalibur_c20058_339	8.5
2B_2	Excalibur_c27557_381	8.5
2B_2	Excalibur_c53027_302	8.5
2B_2	Excalibur_c53027_323	8.5
2B_2	Excalibur_c7136_799	8.5
2B_2	Excalibur_c7136_823	8.5
2B_2	Excalibur_rep_c101660_546	8.5
2B_2	GENE-0581_224	8.5
2B_2	IAAV7837	8.5
2B_2	Jagger_c2273_166	8.5
2B_2	Jagger_c8098_88	8.5
2B_2	Kukri_c12616_844	8.5
2B_2	Kukri_c17483_568	8.5
2B_2	Kukri_c27574_725	8.5
2B_2	Kukri_c29272_363	8.5
2B_2	Kukri_c43403_346	8.5
2B_2	Kukri_c43403_412	8.5
2B_2	Kukri_c43403_594	8.5
2B_2	RAC875_c104148_77	8.5
2B_2	RAC875_c38941_230	8.5
2B_2	RAC875_c8780_441	8.5
2B_2	TA005827-0874	8.5
2B_2	Tdurum_contig11350_827	8.5
2B_2	Tdurum_contig18901_188	8.5
2B_2	Tdurum_contig19415_271	8.5
2B_2	Tdurum_contig19415_329	8.5
2B_2	Tdurum_contig29620_125	8.5
2B_2	Tdurum_contig29620_207	8.5
2B_2	Tdurum_contig29620_285	8.5
2B_2	Tdurum_contig74936_387	8.5
2B_2	Tdurum_contig74936_456	8.5
2B_2	tplb0036o16_1626	8.5
2B_2	wsnp_Ku_c23305_33210628	8.5
2B_2	wsnp_Ku_c23305_33210841	8.5
2B_2	wsnp_RFL_Contig1380_498125	8.5
2B_2	Tdurum_contig11350_629	8.5
2B_2	RAC875_c10183_1569	8.5
2B_2	Kukri_c12616_353	8.5
2B_2	wsnp_Ku_c34759_44069854	8.5
2B_2	Kukri_c16760_259	14.9
2B_2	RAC875_c41476_217	15.5
2B_2	Kukri_c6949_303	15.5
2B_2	TA001389-0564	15.5
2B_2	RAC875_c16675_580	15.5
2B_2	Kukri_c4710_991	15.5
2B_2	Kukri_c36879_83	19.8
2B_2	Tdurum_contig62458_179	21.2
2B_2	RFL_Contig996_350	21.7
2B_2	Kukri_rep_c76670_262	21.7
2B_2	IACX6223	22.6
2B_2	Kukri_c83574_151	22.6
2B_2	Kukri_c83574_636	22.6
2B_2	Tdurum_contig10803_248	22.6
2B_2	RAC875_c37837_889	23.1
2B_2	BS00067337_51	23.1
2B_2	BobWhite_c30622_180	23.1
2B_2	BS00023221_51	23.1
2B_2	Tdurum_contig45350_605	23.1
2B_2	Jagger_c36_213	23.5
2B_2	Excalibur_c12135_100	24.4
2B_2	CAP7_c1018_75	24.4
2B_2	BobWhite_c30112_275	25.4
2B_2	BobWhite_c5511_323	25.4
2B_2	Excalibur_c29769_81	26.7
2B_2	Excalibur_c64276_565	26.7
2B_2	Tdurum_contig36804_220	26.7
2B_2	wsnp_Ex_rep_c67391_65971023	26.7
2B_2	BS00038218_51	27.2
2B_2	BS00038217_51	27.2
2B_2	BS00043099_51	27.2
2B_2	BS00029713_51	27.2
2B_2	D_GBUVHFX02IJCSL_51	27.2
2B_2	Excalibur_c43482_141	27.2
2B_2	Excalibur_c6111_411	27.2
2B_2	RAC875_c16009_223	27.2
2B_2	Tdurum_contig59780_988	27.2
2B_2	tplb0045o20_1168	27.2
2B_2	tplb0045o20_699	27.2
2B_2	wsnp_Ex_c741_1456698	27.2
2B_2	wsnp_JD_c12687_12877994	27.2
2B_2	RAC875_c26415_350	27.7
2B_2	RAC875_c76533_442	27.7
2B_2	Kukri_c15043_326	27.7
2B_2	BobWhite_c40418_289	28.1
2B_2	Excalibur_c25430_183	28.1
2B_2	Excalibur_c33942_139	28.1
2B_2	Kukri_c5904_80	28.1
2B_2	RAC875_c3302_1411	28.1
2B_2	Tdurum_contig1653_190	28.1
2B_2	Tdurum_contig36804_98	28.1
2B_2	Tdurum_contig62852_302	28.1
2B_2	Tdurum_contig62852_369	28.1
2B_2	Tdurum_contig62852_538	28.1
2B_2	Tdurum_contig62852_592	28.1
2B_2	Tdurum_contig68806_537	28.1
2B_2	wsnp_Ex_c5239_9272511	28.1
2B_2	BS00103461_51	28.1
2B_2	BS00110319_51	29.1
2B_2	BS00110442_51	29.1
2B_2	Tdurum_contig7800_228	29.1
2B_2	BS00071690_51	29.1
2B_2	Kukri_c67276_103	29.5
2B_2	BobWhite_s65298_124	29.5
2B_2	Kukri_c4790_154	29.5
2B_2	Kukri_c4790_923	29.5
2B_2	Kukri_rep_c85389_715	29.5
2B_2	Tdurum_contig32621_437	29.5
2B_2	Tdurum_contig81917_141	29.5
2B_2	Tdurum_contig82821_324	29.5
2B_2	RAC875_c35438_474	30.5
2B_2	RAC875_rep_c70402_527	34.2
2B_2	Tdurum_contig77602_931	35.1
2B_2	RAC875_c9562_313	37.9
2B_2	Kukri_rep_c104676_265	37.9
2B_2	Tdurum_contig79134_450	37.9
2B_2	RAC875_c4430_2213	38.4
2B_2	BS00063577_51	38.4
2B_2	Ex_c12004_1006	38.4
2B_2	Ku_c23446_2209	38.4
2B_2	Kukri_c106282_114	38.4
2B_2	BS00065993_51	38.8
2B_2	BS00065994_51	38.8
2B_2	JD_c39990_130	38.8
2B_2	Tdurum_contig83066_276	38.8
2B_2	RAC875_c2660_1206	40.2
2B_2	BobWhite_c22503_605	40.2
2B_2	IACX6411	40.2
2B_2	Ra_c6728_590	40.2
2B_2	RAC875_rep_c113555_122	40.2
2B_2	Tdurum_contig94806_361	40.2
2B_2	wsnp_Ex_c57_116914	40.2
2B_2	GENE-0652_360	41.2
2B_2	GENE-0652_539	41.2
2B_2	Ra_c106376_879	41.2
2B_2	wsnp_RFL_Contig1074_103556	41.2
2B_2	BS00043083_51	41.2
2B_2	RAC875_c15353_1379	41.2
2B_2	RFL_Contig1074_818	41.2
2B_2	BS00067845_51	41.2
2B_2	BS00088575_51	41.2
2B_2	Excalibur_c1305_662	41.2
2B_2	GENE-0644_370	41.2
2B_2	GENE-0644_42	41.2
2B_2	GENE-0644_421	41.2
2B_2	Excalibur_c26042_260	42.1
2B_2	Kukri_c23822_580	42.1
2B_2	Tdurum_contig98206_211	42.6
2B_2	RAC875_c27716_720	43.9
2B_2	BS00065418_51	47.6
2B_2	IAAV6994	47.6
2B_2	RAC875_rep_c118376_304	47.6
2B_2	Tdurum_contig18197_86	48.6
2B_2	Tdurum_contig62595_466	48.6
2B_2	Ra_c2110_805	49
2B_2	RAC875_c11207_1066	49
2B_2	RAC875_c14105_66	49
2B_2	RAC875_c2110_117	49
2B_2	wsnp_CAP12_rep_c4678_2134259	49
2B_2	RAC875_c38625_105	49
2B_2	D_contig07894_190	49
2B_2	RAC875_c11207_1028	49
2B_2	wsnp_CAP11_rep_c8700_3756682	49
2B_2	BS00073447_51	49.5
2B_2	Excalibur_c21882_663	50.4
2B_2	GENE-1147_486	58.5
2B_2	Ex_c16854_1307	59
2B_2	wsnp_Ex_c45094_50985067	59
2B_2	RAC875_c1226_652	59
2B_2	wsnp_Ex_c9248_15372536	59
2B_2	BS00092273_51	59.4
2B_2	Excalibur_rep_c106124_239	59.4
2B_2	GENE-1389_59	59.4
2B_2	IACX1412	59.4
2B_2	Kukri_c22200_1171	59.4
2B_2	Kukri_c29600_68	59.4
2B_2	Ra_c4397_542	59.4
2B_2	wsnp_BE399688B_Ta_2_1	59.4
2B_2	wsnp_Ex_c14595_22634031	59.4
2B_2	BS00073426_51	59.9
2B_2	BS00070091_51	61.3
2B_2	wsnp_BE404601B_Ta_2_1	61.8
2B_2	BS00035894_51	62.2
2B_2	BS00040959_51	62.2
2B_2	IAAV1903	72.5
2B_2	BobWhite_c5820_169	74.4
2B_2	BobWhite_c7786_376	74.4
2B_2	IAAV5331	74.4
2B_2	BobWhite_c948_52	74.8
2B_2	TA001322-1176	74.8
2B_2	wsnp_CAP7_c402_217331	74.8
2B_2	Kukri_c10054_567	75.3
2B_2	Kukri_rep_c94009_116	75.3
2B_2	wsnp_Ex_c33246_41764093	75.3
2B_2	wsnp_Ex_rep_c101906_87187119	75.3
2B_2	wsnp_JD_c6350_7517130	75.3
2B_2	wsnp_JD_c6350_7516597	75.3
2B_2	BS00043103_51	75.8
2B_2	BS00091007_51	75.8
2B_2	Excalibur_c44495_105	75.8
2B_2	CAP12_rep_c4483_301	76.2
2B_2	Ex_c101393_1898	76.2
2B_2	Ra_c24071_210	77.6
2B_2	wsnp_Ex_c3764_6853627	77.6
2B_2	RAC875_c97988_87	78.1
2B_2	RAC875_c97988_123	78.1
2B_2	BS00064851_51	78.5
2B_2	wsnp_Ex_c1459_2797709	78.5
2B_2	Ku_c4777_2494	78.5
2B_2	BS00037278_51	78.5
2B_2	wsnp_Ku_c27759_37702654	78.5
2B_2	wsnp_Ku_c18923_28319203	79
2B_2	wsnp_Ku_c2725_5163093	79.4
2B_2	BS00034315_51	79.4
2B_2	Ex_c3769_791	79.4
2B_2	Excalibur_c41397_439	79.4
2B_2	Excalibur_rep_c102216_253	79.4
2B_2	RAC875_c46023_492	79.4
2B_2	wsnp_Ex_c2557_4761174	79.4
2B_2	wsnp_Ex_c9935_16358436	79.4
2B_2	wsnp_Ex_c9935_16358536	79.4
2B_2	wsnp_Ex_rep_c102216_87433489	79.4
2B_2	wsnp_Ex_rep_c106085_90293854	79.4
2B_2	wsnp_Ku_c3042_5706318	79.4
2B_2	wsnp_Ra_c46023_52004149	79.4
2B_2	wsnp_Ku_c2562_4879681	79.9
2B_2	Ex_c14771_392	79.9
2B_2	Ex_c8832_2521	79.9
2B_2	Excalibur_rep_c107558_367	79.9
2B_2	wsnp_BF291736B_Ta_1_1	79.9
2B_2	wsnp_CAP7_c2233_1085003	79.9
2B_2	wsnp_Ex_c14771_22883575	79.9
2B_2	wsnp_Ex_c29108_38173309	79.9
2B_2	wsnp_Ex_c38739_46196393	79.9
2B_2	wsnp_Ku_c12900_20727771	79.9
2B_2	Kukri_c17223_1165	80.4
2B_2	RAC875_c12968_1526	81.3
2B_2	RAC875_c3691_1428	82.2
2B_2	RAC875_c65101_756	82.2
2B_2	RAC875_c8045_231	82.2
2B_2	RAC875_rep_c71760_57	82.2
2B_2	RFL_Contig5290_1493	82.2
2B_2	D_GDS7LZN02HZNCY_321	82.7
2B_2	RAC875_c17331_129	82.7
2B_2	BS00037345_51	82.7
2B_2	Excalibur_c15696_1280	82.7
2B_2	Excalibur_c15696_737	82.7
2B_2	Excalibur_c90811_88	82.7
2B_2	Ku_c6546_718	82.7
2B_2	Ra_c23048_474	82.7
2B_2	RAC875_c46661_184	82.7
2B_2	RAC875_c46735_674	82.7
2B_2	RAC875_c5080_915	82.7
2B_2	RAC875_c57901_354	82.7
2B_2	TA002964-0938	82.7
2B_2	Tdurum_contig11960_209	82.7
2B_2	tplb0059a11_1190	82.7
2B_2	wsnp_BE445278B_Ta_2_3	82.7
2B_2	wsnp_Ra_c2842_5399988	82.7
2B_2	Excalibur_rep_c109282_92	83.3
2B_2	BobWhite_c19617_154	83.3
2B_2	wsnp_BE445278B_Ta_2_1	83.3
2B_2	CAP8_c3982_23	83.7
2B_2	CAP7_c7349_21	83.7
2B_2	wsnp_CAP11_c5474_2542512	83.7
2B_2	RAC875_c3752_890	83.7
2B_2	BS00007901_51	83.7
2B_2	CAP8_c5800_150	83.7
2B_2	wsnp_CAP11_c5240_2436441	83.7
2B_2	wsnp_CAP11_c5474_2542616	83.7
2B_2	wsnp_CAP7_rep_c7349_3284058	83.7
2B_2	wsnp_CAP8_rep_c4147_2032009	83.7
2B_2	wsnp_CAP8_rep_c5599_2654989	83.7
2B_2	wsnp_Ex_c7003_12065828	83.7
2B_2	BobWhite_c892_73	85.2
2B_2	wsnp_Ex_c51352_55323092	85.2
2B_2	wsnp_Ex_rep_c67671_66332423	85.2
2B_2	RAC875_c63545_85	90.3
2B_2	BobWhite_rep_c48743_625	91.7
2B_2	BobWhite_rep_c49468_443	91.7
2B_2	Excalibur_c46024_97	91.7
2B_2	Ra_c28259_603	91.7
2B_2	wsnp_Ex_c11904_19091967	91.7
2B_2	wsnp_Ex_c21991_31162645	91.7
2B_2	wsnp_Ex_c2497_4666526	91.7
2B_2	wsnp_Ex_c43212_49594902	91.7
2B_2	wsnp_Ex_c4334_7816096	91.7
2B_2	wsnp_Ex_c52240_55911010	91.7
2B_2	wsnp_Ex_c7347_12594158	91.7
2B_2	wsnp_Ku_c33652_43115283	91.7
2B_2	BobWhite_c10453_396	91.7
2B_2	BobWhite_c13455_112	91.7
2B_2	BobWhite_c3757_55	91.7
2B_2	BobWhite_c5197_703	91.7
2B_2	BobWhite_rep_c48743_691	91.7
2B_2	BobWhite_rep_c54390_73	91.7
2B_2	BobWhite_rep_c54702_89	91.7
2B_2	CAP8_c621_57	91.7
2B_2	CAP8_rep_c9587_147	91.7
2B_2	D_GDEEGVY01DXTWK_75	91.7
2B_2	Ex_c66545_551	91.7
2B_2	Ex_c66545_567	91.7
2B_2	Excalibur_c10122_789	91.7
2B_2	Excalibur_c3839_2483	91.7
2B_2	Excalibur_c48957_395	91.7
2B_2	Excalibur_c4984_162	91.7
2B_2	Excalibur_c60716_53	91.7
2B_2	Excalibur_rep_c102353_307	91.7
2B_2	Excalibur_rep_c69016_57	91.7
2B_2	Excalibur_rep_c69187_151	91.7
2B_2	IAAV1987	91.7
2B_2	IAAV259	91.7
2B_2	IACX1028	91.7
2B_2	Ku_c46339_317	91.7
2B_2	Kukri_c110148_53	91.7
2B_2	Kukri_c26645_254	91.7
2B_2	Kukri_c34231_167	91.7
2B_2	Kukri_c38850_1476	91.7
2B_2	Kukri_c5609_565	91.7
2B_2	Kukri_c5609_737	91.7
2B_2	Kukri_c673_452	91.7
2B_2	Kukri_c691_3187	91.7
2B_2	Kukri_c691_504	91.7
2B_2	Kukri_rep_c100990_597	91.7
2B_2	Kukri_rep_c69962_1081	91.7
2B_2	Kukri_rep_c72413_423	91.7
2B_2	RAC875_c19043_841	91.7
2B_2	RAC875_c20366_376	91.7
2B_2	RAC875_c26460_807	91.7
2B_2	RAC875_c87421_408	91.7
2B_2	RAC875_rep_c111100_447	91.7
2B_2	RAC875_s119681_325	91.7
2B_2	RFL_Contig3301_510	91.7
2B_2	RFL_Contig3353_125	91.7
2B_2	RFL_Contig4748_1076	91.7
2B_2	TA002695-2341	91.7
2B_2	tplb0038f13_1219	91.7
2B_2	wsnp_be498599B_Ta_1_1	91.7
2B_2	wsnp_CAP7_c193_107526	91.7
2B_2	wsnp_Ex_c10279_16851747	91.7
2B_2	wsnp_Ex_c14735_22823373	91.7
2B_2	wsnp_Ex_c1541_2943791	91.7
2B_2	wsnp_Ex_c1548_2961101	91.7
2B_2	wsnp_Ex_c1568_2993540	91.7
2B_2	wsnp_Ex_c16970_25563701	91.7
2B_2	wsnp_Ex_c20367_29431681	91.7
2B_2	wsnp_Ex_c21532_30680512	91.7
2B_2	wsnp_Ex_c22693_31898036	91.7
2B_2	wsnp_Ex_c26375_35620271	91.7
2B_2	wsnp_Ex_c2905_5358140	91.7
2B_2	wsnp_Ex_c30037_39004913	91.7
2B_2	wsnp_Ex_c3386_6217891	91.7
2B_2	wsnp_Ex_c36002_44045355	91.7
2B_2	wsnp_Ex_c37950_45589555	91.7
2B_2	wsnp_Ex_c3839_6981725	91.7
2B_2	wsnp_Ex_c39862_47046812	91.7
2B_2	wsnp_Ex_c40726_47723984	91.7
2B_2	wsnp_Ex_c42447_49025091	91.7
2B_2	wsnp_Ex_c4423_7960221	91.7
2B_2	wsnp_Ex_c45851_51530126	91.7
2B_2	wsnp_Ex_c482_957514	91.7
2B_2	wsnp_Ex_c52458_56049703	91.7
2B_2	wsnp_Ex_c59991_60628628	91.7
2B_2	wsnp_Ex_c6248_10896799	91.7
2B_2	wsnp_Ex_c6295_10967631	91.7
2B_2	wsnp_Ex_c7516_12850225	91.7
2B_2	wsnp_Ex_c7947_13490279	91.7
2B_2	wsnp_Ex_c9133_15198596	91.7
2B_2	wsnp_Ex_c9133_15198714	91.7
2B_2	wsnp_Ex_c9133_15199135	91.7
2B_2	wsnp_Ex_c9805_16183499	91.7
2B_2	wsnp_Ex_rep_c105160_89664213	91.7
2B_2	wsnp_Ex_rep_c66482_64735785	91.7
2B_2	wsnp_Ex_rep_c66482_64736708	91.7
2B_2	wsnp_Ex_rep_c66545_64828871	91.7
2B_2	wsnp_Ex_rep_c69016_67915892	91.7
2B_2	wsnp_Ex_rep_c69465_68405569	91.7
2B_2	wsnp_Ex_rep_c69928_68889412	91.7
2B_2	wsnp_Ex_rep_c70228_69172301	91.7
2B_2	wsnp_Ex_rep_c71064_69904031	91.7
2B_2	wsnp_JD_c2631_3548229	91.7
2B_2	wsnp_JD_c32007_24763860	91.7
2B_2	wsnp_JD_c3314_4323825	91.7
2B_2	wsnp_Ku_c11848_19265325	91.7
2B_2	wsnp_Ku_c11850_19271281	91.7
2B_2	wsnp_Ku_c13756_21844262	91.7
2B_2	wsnp_Ku_c673_1393449	91.7
2B_2	wsnp_Ku_c691_1430065	91.7
2B_2	wsnp_Ku_rep_c100990_88230610	91.7
2B_2	wsnp_Ra_c28444_37905400	91.7
2B_2	wsnp_Ra_c4746_8540731	91.7
2B_2	BobWhite_c18672_757	91.7
2B_2	BobWhite_rep_c49468_101	91.7
2B_2	Excalibur_c26999_488	91.7
2B_2	Kukri_c65484_1250	91.7
2B_2	Ra_c8602_465	91.7
2B_2	RAC875_c20950_461	91.7
2B_2	RAC875_c400_1271	91.7
2B_2	RAC875_c400_2722	91.7
2B_2	RAC875_c400_3016	91.7
2B_2	tplb0046p14_388	91.7
2B_2	wsnp_Ex_c5429_9593668	91.7
2B_2	wsnp_Ku_c22272_32093892	91.7
2B_2	wsnp_Ku_c691_1429427	91.7
2B_2	wsnp_Ex_c17538_26261053	91.7
2B_2	TA002306-1975	91.7
2B_2	wsnp_Ra_c4126_7552133	92.1
2B_2	Ku_c14843_504	92.1
2B_2	wsnp_Ku_rep_c101330_88510141	92.1
2B_2	wsnp_Ex_rep_c66545_64829026	92.1
2B_2	wsnp_Ex_c7947_13490335	92.1
2B_2	wsnp_Ex_rep_c66270_64420584	92.1
2B_2	Excalibur_rep_c104954_576	92.1
2B_2	BobWhite_c11800_96	92.1
2B_2	BS00062485_51	92.1
2B_2	BS00076369_51	92.1
2B_2	CAP7_c2854_46	92.1
2B_2	Ex_c66545_1078	92.1
2B_2	Excalibur_c13028_683	92.1
2B_2	Excalibur_c85610_72	92.1
2B_2	IAAV3148	92.1
2B_2	IAAV3295	92.1
2B_2	Kukri_c11850_1711	92.1
2B_2	Kukri_c2507_1183	92.1
2B_2	Kukri_c2507_382	92.1
2B_2	Kukri_c2507_962	92.1
2B_2	Kukri_c91621_319	92.1
2B_2	Kukri_c91621_386	92.1
2B_2	wsnp_BE488220B_Ta_1_1	92.1
2B_2	wsnp_Ex_c3386_6217645	92.1
2B_2	wsnp_Ex_c37611_45330886	92.1
2B_2	wsnp_Ex_c47661_52802548	92.1
2B_2	wsnp_Ex_c5363_9482943	92.1
2B_2	wsnp_Ex_c7347_12594320	92.1
2B_2	wsnp_Ex_rep_c66545_64828225	92.1
2B_2	wsnp_Ex_rep_c66545_64829277	92.1
2B_2	wsnp_Ex_rep_c73919_71799491	92.1
2B_2	wsnp_Ku_c8088_13805885	92.1
2B_2	Ex_c7628_2392	92.1
2B_2	Ku_c65484_365	92.1
2B_2	wsnp_Ku_c691_1429483	92.1
2B_2	Kukri_c22216_846	92.1
2B_2	BS00072379_51	93.5
2B_2	wsnp_RFL_Contig3802_4108582	93.5
2B_2	Kukri_c3096_1411	94.5
2B_2	RAC875_c101453_216	94.5
2B_2	RAC875_c61883_194	94.5
2B_2	Excalibur_c39184_251	94.5
2B_2	wsnp_Ex_c4218_7618252	94.5
2B_2	Excalibur_c15634_192	94.5
2B_2	Excalibur_c3776_2025	94.5
2B_2	RAC875_c57938_94	94.5
2B_2	Kukri_c20819_497	99.1
2B_2	RAC875_c3039_101	99.1
2B_2	wsnp_Ex_c25438_34703568	99.1
2B_2	Kukri_c54844_464	99.6
2B_2	Kukri_c1877_121	99.6
2B_2	Excalibur_c99477_90	99.6
2B_2	BobWhite_c7326_70	99.6
2B_2	JD_c2909_278	99.6
2B_2	Ku_c33341_260	99.6
2B_2	Kukri_c55599_153	99.6
2B_2	Ra_c106383_270	99.6
2B_2	Ra_c21042_617	99.6
2B_2	BS00083727_51	100.1
2B_2	wsnp_BF145580A_Ta_2_2	102.9
2B_2	BobWhite_c21705_196	102.9
2B_2	BobWhite_c21705_722	102.9
2B_2	Tdurum_contig64751_120	102.9
2B_2	Tdurum_contig64751_231	102.9
2B_2	Tdurum_contig48833_736	106.6
2B_2	Tdurum_contig14442_1008	108
2B_2	BobWhite_c9351_274	108
2B_2	IAAV3893	108
2B_2	Ra_c15365_530	108
2B_2	wsnp_CAP7_c1453_728076	108
2B_2	Tdurum_contig12836_418	108.5
2B_2	CAP11_c1476_128	109.9
2B_2	Excalibur_rep_c106939_325	109.9
2B_2	Ra_c1799_1066	109.9
2B_2	RAC875_c30053_167	109.9
2B_2	wsnp_Ex_c25217_34481787	109.9
2B_2	wsnp_Ku_c4004_7311479	109.9
2B_2	Kukri_c25281_99	109.9
2B_2	wsnp_Ex_c17700_26446810	109.9
2B_2	Ku_c68762_669	110.4
2B_2	Kukri_c53402_251	110.4
2B_2	Ra_c32699_410	110.4
2B_2	wsnp_Ex_c41558_48355943	110.4
2B_2	wsnp_Ex_c41558_48356814	110.4
2B_2	wsnp_Ex_c41558_48356869	110.4
2B_2	wsnp_JD_c14405_14144807	110.4
2B_2	wsnp_Ku_rep_c68888_68067293	110.4
2B_2	Excalibur_c42364_134	110.8
2B_2	Tdurum_contig14688_78	110.8
2B_2	Jagger_c6853_60	112.2
2B_2	Tdurum_contig25602_212	115.5
2B_2	RFL_Contig1987_3440	115.5
2B_2	Excalibur_c37715_242	120.1
2B_2	CAP8_rep_c6671_353	120.1
2B_2	Kukri_c25868_56	120.1
2B_2	RFL_Contig1291_414	120.1
2B_2	RFL_Contig1445_1192	120.1
2B_2	Tdurum_contig25629_415	120.1
2B_2	wsnp_Ex_c13908_21774935	120.1
2B_2	RAC875_c12886_2359	139.2
2B_2	Tdurum_contig35408_205	142.9
2B_2	Tdurum_contig60773_387	142.9
2B_2	Tdurum_contig12459_405	142.9
2B_2	BS00057475_51	142.9
2B_2	GENE-1080_39	142.9
2B_2	Kukri_c65315_82	142.9
2B_2	Tdurum_contig12459_491	143.4
2B_2	Excalibur_c369_842	143.9
2B_2	Tdurum_contig74826_330	143.9
2B_2	Tdurum_contig10380_87	143.9
2B_2	Tdurum_contig12459_664	143.9
2B_2	Tdurum_contig23247_66	143.9
2B_2	BobWhite_c1933_407	152.4
2B_2	BobWhite_rep_c64679_73	152.4
2B_2	RFL_Contig5073_1003	152.4
2B_2	Tdurum_contig5691_526	152.4
2B_2	Tdurum_contig76090_916	152.4
2B_2	wsnp_Ex_c18503_27349536	152.4
2B_2	Tdurum_contig5691_596	152.4
2B_2	wsnp_Ex_c58274_59639258	152.4
2B_2	GENE-1399_185	157.1
2B_2	Excalibur_c1353_1364	157.6
2B_2	BobWhite_c1072_100	158.1
2B_2	Excalibur_c22637_235	158.5
2B_2	tplb0021f14_1322	160.1
2B_2	Excalibur_rep_c77221_93	160.1
2B_2	Tdurum_contig11653_371	160.1
2B_2	RAC875_c28108_400	160.5
2B_2	BobWhite_c18540_97	162.4
2B_2	Kukri_c9118_1774	163.3
2B_2	wsnp_Ex_c20182_29230528	163.3
2B_2	IAAV4899	163.3
2B_2	RAC875_rep_c74537_344	163.3
2B_2	BS00016650_51	163.3
2B_2	Kukri_rep_c108243_143	163.3
2B_2	RAC875_rep_c108548_163	163.3
2B_2	wsnp_Ex_rep_c71983_70544041	163.3
2B_2	BS00059896_51	163.3
2B_2	BS00023124_51	163.3
2B_2	IACX5919	163.3
2B_2	RAC875_c8197_810	163.3
2B_2	Tdurum_contig55699_246	163.3
2B_2	Tdurum_contig55729_1220	163.3
2B_2	wsnp_Ku_c52392_57380726	163.3
2B_2	BobWhite_c2410_175	163.3
2B_2	BobWhite_c22728_78	163.3
2B_2	Excalibur_c40976_111	163.3
2B_2	Excalibur_c40976_87	163.3
2B_2	RAC875_c23538_1517	163.3
2B_2	wsnp_Ex_c40976_47910144	163.3
2B_2	BobWhite_c22728_257	163.3
2B_2	Ex_c47157_508	163.3
2B_2	wsnp_Ex_c40976_47910672	163.3
2B_2	wsnp_Ex_rep_c105744_90067453	163.3
2B_2	RAC875_c17455_152	169.5
2B_2	Ra_c69196_575	169.5
2B_2	IACX6309	169.5
2B_2	Kukri_c84629_315	169.5
2B_2	Tdurum_contig96648_102	169.5
2B_2	wsnp_Ex_c5123_9088111	169.5
2B_2	wsnp_Ex_c5123_9089025	169.5
2B_2	wsnp_Ex_c5123_9089624	169.5
2B_2	wsnp_Ku_c9901_16493072	169.5
2B_2	IACX6231	169.5
2B_2	wsnp_Ex_c5123_9087869	169.5
2B_2	IACX2142	169.5
2B_2	RAC875_c17658_1419	169.5
2B_2	Excalibur_c65341_303	169.5
2B_2	RAC875_c54927_238	169.5
2B_2	Tdurum_contig96648_192	169.5
2B_2	RAC875_c3397_274	169.5
2B_2	Tdurum_contig10219_295	169.5
2B_2	Tdurum_contig70558_492	169.5
2B_2	Excalibur_c46178_303	169.5
2B_2	BobWhite_c8109_82	169.5
2B_2	BobWhite_rep_c66891_121	169.5
2B_2	Excalibur_c7449_587	169.5
2B_2	IACX2158	169.5
2B_2	RAC875_c9845_762	169.5
2B_2	RFL_Contig3044_346	169.5
2B_2	RFL_Contig3172_1752	169.5
2B_2	Tdurum_contig10219_706	169.5
2B_2	TA005601-0686	170
2B_2	Excalibur_rep_c111801_55	170
2B_2	Kukri_c52356_96	170
2B_2	RAC875_c76186_353	170
2B_2	wsnp_JD_c6010_7167159	170
2B_2	GENE-1012_680	170
2B_2	Tdurum_contig23273_179	170.5
2B_2	RAC875_c58006_436	170.5
2B_2	Kukri_c31059_165	170.5
2B_2	Kukri_c31059_130	170.5
2B_2	Tdurum_contig14707_251	170.5
2B_2	wsnp_RFL_Contig2123_1397739	170.5
2B_2	BS00066719_51	170.5
2B_2	JD_c3211_962	173.8
2B_2	wsnp_Ra_c54256_57628288	173.8
2B_2	Ku_c16468_146	177
2B_2	Tdurum_contig12879_1200	177.5
2B_2	Tdurum_contig12879_1384	177.5
2B_2	Tdurum_contig12879_320	177.5
2B_2	Tdurum_contig12879_264	177.5
2B_2	Kukri_c1314_371	177.5
2B_2	Tdurum_contig12879_201	177.5
2B_2	Kukri_c36266_120	178
2B_2	Kukri_c15555_587	183.2
2B_2	Excalibur_c2484_2113	183.6
2B_2	Excalibur_c5801_177	187.4
2B_2	Tdurum_contig42046_1426	187.4
2B_2	Tdurum_contig67613_465	187.4
2B_2	Tdurum_contig78534_314	187.4
2B_2	wsnp_Ex_c13353_21046550	187.4
2B_2	wsnp_Ra_c4660_8405634	187.4
2B_2	wsnp_Ex_rep_c101581_86924089	187.4
2B_2	wsnp_Ex_c19772_28771627	187.4
2B_2	Kukri_c16601_822	187.9
2B_2	RAC875_c81984_707	187.9
2B_2	Tdurum_contig42046_1390	187.9
2B_2	Tdurum_contig61927_493	187.9
2B_2	wsnp_Ex_c29382_38422739	187.9
[truncated: 5,317 more rows]

## Sheet: Saragolla Map
	Linkage map for the Saragolla/ATRED #2 population
Linkage group	Marker	Position
1A_1	Tdurum_contig59794_640	0
1A_1	Tdurum_contig97729_491	0
1A_1	BS00022677_51	0.5
1A_1	BobWhite_c1361_1187	0.5
1A_1	Tdurum_contig60323_605	0.5
1A_1	BobWhite_c31470_532	1
1A_1	BS00010488_51	1
1A_1	BS00064204_51	1
1A_1	BS00064205_51	1
1A_1	CAP11_rep_c7878_143	1
1A_1	RAC875_c95364_259	1
1A_1	wsnp_Ex_c10657_17376448	1
1A_1	BS00009423_51	1
1A_1	BS00082567_51	3.5
1A_1	BS00023130_51	3.5
1A_1	CAP12_c3074_192	3.5
1A_1	TA001286-0611-w	5
1A_1	CAP7_c6316_80	6
1A_1	Tdurum_contig46733_6628	6.5
1A_1	BS00060058_51	13.8
1A_1	BS00080187_51	13.8
1A_1	Excalibur_c71158_117	13.8
1A_1	Excalibur_c71158_54	13.8
1A_1	GENE-0411_723	13.8
1A_1	GENE-0411_807	13.8
1A_1	RFL_Contig1027_442	13.8
1A_1	wsnp_Ex_rep_c106111_90308719	13.8
1A_1	BS00003595_51	13.8
1A_1	BobWhite_c863_1064	13.8
1A_1	BS00074511_51	13.8
1A_1	BS00110375_51	13.8
1A_1	Kukri_c2446_683	13.8
1A_1	Kukri_c24615_385	13.8
1A_1	Kukri_c32052_171	13.8
1A_1	Kukri_c54157_315	13.8
1A_1	RAC875_c1710_376	13.8
1A_1	Tdurum_contig68827_118	13.8
1A_1	BobWhite_c39996_85	13.8
1A_1	CAP11_c852_603	13.8
1A_1	Ex_c13421_2094	13.8
1A_1	Excalibur_c17152_454	13.8
1A_1	Kukri_c46939_83	13.8
1A_1	Kukri_c54157_348	13.8
1A_1	Tdurum_contig42479_3800	24.5
1A_1	Excalibur_c101903_734	25
1A_1	IAAV4132	25
1A_1	Kukri_c13513_878	25
1A_1	BS00083459_51	25
1A_1	Excalibur_c45969_370	25
1A_1	GENE-3336_136	25
1A_1	Kukri_c41943_535	25
1A_1	Jagger_rep_c10343_173	25
1A_1	IACX11001	25
1A_1	Excalibur_c25175_512	25
1A_1	Excalibur_c58154_84	25
1A_1	Kukri_c2121_2345	25
1A_1	wsnp_JD_c7522_8606553	25
1A_1	Kukri_c2121_1334	25
1A_1	RAC875_c50463_808	25
1A_1	wsnp_Ex_c7442_12743707	25
1A_1	wsnp_Ex_c4876_8692783	25
1A_1	Ex_c4876_1221	25
1A_1	BS00023485_51	25
1A_1	BobWhite_c48447_529	25.5
1A_1	Excalibur_c48152_818	26
1A_1	Kukri_c37592_531	26
1A_1	Jagger_c8952_378	26
1A_1	Excalibur_c101903_902	30.2
1A_2	Tdurum_contig8382_300	0
1A_2	BobWhite_c4384_262	3.3
1A_2	BobWhite_c48591_394	3.3
1A_2	Excalibur_c7026_2635	3.3
1A_2	Kukri_c13136_1363	3.3
1A_2	Kukri_c13593_203	3.3
1A_2	wsnp_JD_c9290_10155594	3.3
1A_2	Kukri_c31964_109	6.7
1A_2	Kukri_c31964_56	6.7
1A_2	Kukri_c12534_559	6.7
1A_2	Tdurum_contig13937_2280	6.7
1A_2	Excalibur_rep_c77404_218	11.7
1A_2	Kukri_c46010_146	11.7
1A_2	Ra_c22663_367	11.7
1A_2	Tdurum_contig50355_269	11.7
1A_2	Tdurum_contig50355_685	11.7
1A_2	wsnp_Ex_c31983_40709607	11.7
1A_2	wsnp_Ex_c31983_40709866	11.7
1A_2	JD_c12243_353	12.2
1A_2	Kukri_c82555_88	12.2
1A_2	Kukri_c7579_443	12.2
1A_2	Kukri_c7579_559	12.2
1A_2	RAC875_c10090_963	12.2
1A_2	RAC875_c14066_452	12.2
1A_2	RAC875_rep_c111911_116	12.2
1A_2	Tdurum_contig11004_400	12.2
1A_2	Tdurum_contig11004_613	12.2
1A_2	Tdurum_contig13946_241	12.2
1A_2	Tdurum_contig13946_329	12.2
1A_2	Tdurum_contig29280_216	12.2
1A_2	Tdurum_contig56382_747	12.2
1A_2	Tdurum_contig61515_259	12.2
1A_2	Tdurum_contig61515_522	12.2
1A_2	Tdurum_contig77289_179	12.2
1A_2	Tdurum_contig34019_260	12.2
1A_2	IAAV5652	13.7
1A_2	TA003773-0807	13.7
1A_2	BS00012210_51	14.2
1A_2	Tdurum_contig47183_205	14.7
1A_2	Tdurum_contig622_285	14.7
1A_2	Tdurum_contig76915_88	14.7
1A_2	Tdurum_contig47183_333	14.7
1A_2	Excalibur_rep_c114535_55	17.2
1A_2	Ku_c11769_252	17.2
1A_2	Tdurum_contig9199_714	17.2
1A_2	BS00110151_51	17.7
1A_2	BobWhite_c7352_218	17.7
1A_2	Tdurum_contig5008_635	17.7
1A_2	Tdurum_contig69753_513	17.7
1A_2	BS00013227_51	18.2
1A_2	BS00022870_51	18.2
1A_2	Kukri_c3150_341	18.2
1A_2	Kukri_c65511_1057	18.2
1A_2	BobWhite_c4646_119	21.7
1A_2	Tdurum_contig97688_186	21.7
1A_2	Tdurum_contig49251_560	31.3
1A_2	Tdurum_contig16812_256	34.8
1A_2	D_contig09975_188	37.8
1A_2	BobWhite_c31155_350	37.8
1A_2	Kukri_c6106_470	37.8
1A_2	RAC875_rep_c85118_294	37.8
1A_2	Tdurum_contig53332_743	37.8
1A_2	BobWhite_c478_1386	40.3
1A_2	Kukri_c609_328	40.3
1A_2	wsnp_Ex_c1959_3692097	40.3
1A_2	BS00022156_51	40.3
1A_2	BS00031200_51	40.3
1A_2	IAAV3552	40.3
1A_2	IACX10924	40.3
1A_2	Kukri_c28532_103	40.3
1A_2	Ra_c10580_1629	40.3
1A_2	Ra_c2322_1067	40.3
1A_2	Ra_c2322_174	40.3
1A_2	RAC875_c41581_176	40.3
1A_2	RAC875_c49760_107	40.3
1A_2	RAC875_c65515_283	40.3
1A_2	Tdurum_contig27881_275	40.3
1A_2	Tdurum_contig30751_333	40.3
1A_2	Tdurum_contig43360_1381	40.3
1A_2	Tdurum_contig43360_1592	40.3
1A_2	Tdurum_contig45671_799	40.3
1A_2	Tdurum_contig72192_260	40.3
1A_2	Tdurum_contig81558_113	40.3
1A_2	Tdurum_contig81558_272	40.3
1A_2	wsnp_BE605063A_Ta_2_2	40.3
1A_2	wsnp_BE605063A_Ta_2_3	40.3
1A_2	wsnp_Ex_c2178_4086161	40.3
1A_2	wsnp_Ku_c30921_40705731	40.3
1A_2	wsnp_Ku_rep_c71909_71634013	40.3
1A_2	wsnp_RFL_Contig2808_2585736	40.3
1A_2	Tdurum_contig27881_413	40.3
1A_2	TA001042-0912	40.3
1A_2	GENE-0405_237	40.3
1A_2	IACX7695	40.3
1A_2	wsnp_Ex_c15188_23387754	40.3
1A_2	Tdurum_contig15970_607	40.8
1A_2	wsnp_BE585780A_Ta_2_2	40.8
1A_2	Tdurum_contig54929_517	41.3
1A_2	IAAV2709	41.8
1A_2	BobWhite_c46349_402	43.3
1A_2	Excalibur_c17872_137	43.3
1A_2	Excalibur_c33881_618	43.3
1A_2	GENE-0071_115	43.3
1A_2	IACX2325	43.3
1A_2	Tdurum_contig10996_2485	43.8
1A_2	Tdurum_contig48416_335	44.8
1A_2	BS00081455_51	45.3
1A_2	Kukri_c67601_267	45.3
1A_2	Tdurum_contig62552_256	45.3
1A_2	wsnp_Ex_c18169_26977013	45.3
1A_2	BS00021878_51	45.8
1A_2	IAAV7551	45.8
1A_2	wsnp_Ex_c4605_8240189	45.8
1A_2	wsnp_Ex_rep_c101414_86780996	45.8
1A_2	wsnp_Ex_rep_c101414_86781128	45.8
1A_2	RAC875_c3751_96	45.8
1A_2	Tdurum_contig55009_1153	45.8
1A_2	wsnp_Ex_c4605_8241260	45.8
1A_2	wsnp_Ex_c4605_8239915	45.8
1A_2	wsnp_BF475149A_Ta_2_1	45.8
1A_3	wsnp_Ex_rep_c68857_67737959	0
1A_3	Excalibur_c52495_89	4
1A_3	Kukri_c37726_285	7.9
1A_3	Tdurum_contig50499_858	7.9
1A_3	Tdurum_contig45301_1322	13.9
1A_3	Kukri_c1313_1158	16.4
1A_3	BobWhite_c14158_112	27.5
1A_3	RAC875_rep_c109970_73	33.9
1A_3	BobWhite_c15152_341	34.4
1A_3	BS00085366_51	46.7
1A_3	wsnp_BE443588A_Ta_2_1	47.2
1A_3	wsnp_Ex_c30552_39457767	74
1A_3	wsnp_Ra_rep_c108284_91604017	77.1
1A_3	BobWhite_c44164_402	99.5
1A_3	wsnp_Ex_c48407_53323801	112.4
1A_3	Tdurum_contig893_53	117.5
1A_3	IAAV618	117.5
1A_3	RAC875_c57566_61	121.5
1A_3	Tdurum_contig47006_2711	151
1A_3	wsnp_Ex_c34694_42959047	151
1A_3	BS00032855_51	151
1A_3	Excalibur_rep_c71271_247	151
1A_3	Tdurum_contig47006_1105	151
1A_3	Tdurum_contig47006_1641	151
1A_3	Tdurum_contig9144_1571	151
1A_3	tplb0059i08_441	151
1A_3	wsnp_Ex_c2918_5381441	151
1A_3	Tdurum_contig5560_193	151
1A_3	Excalibur_c88792_93	181.6
1A_3	RFL_Contig3683_1784	181.6
1A_3	BobWhite_c6820_199	184.2
1A_3	wsnp_Ex_c3264_6017750	184.2
1A_3	RAC875_c48804_590	187.7
1A_3	Tdurum_contig85466_170	187.7
1A_3	CAP7_c490_123	187.7
1A_3	CAP12_c8163_118	187.7
1A_3	CAP12_rep_c6128_120	188.2
1A_3	Kukri_c51781_199	188.2
1A_3	RAC875_c23586_541	188.2
1A_3	Tdurum_contig60210_371	188.2
1A_3	wsnp_Ku_rep_c109724_94227136	193.2
1A_3	Excalibur_rep_c110054_341	219.5
1A_3	Tdurum_contig12152_63	219.5
1A_3	BobWhite_c20553_568	219.5
1A_3	JD_c20553_448	219.5
1A_3	Kukri_c14635_73	219.5
1A_3	Ra_c41164_730	219.5
1A_3	Ra_c5683_1762	219.5
1A_3	Ra_c5683_2584	219.5
1A_3	RAC875_rep_c119761_111	219.5
1A_3	wsnp_JD_c20553_18260620	219.5
1A_3	wsnp_JD_c20553_18260731	219.5
1A_3	Ra_c8027_1021	222.5
1A_3	RAC875_c49433_308	222.5
1A_3	wsnp_Ex_c23143_32376622	222.5
1A_3	Kukri_c82086_387	223.5
1A_3	RFL_Contig399_976	223.5
1A_3	Tdurum_contig81642_298	223.5
1A_3	wsnp_Ex_c3594_6568869	223.5
1A_3	RFL_Contig399_1148	223.5
1A_3	RFL_Contig399_1005	223.5
1A_3	Tdurum_contig56538_140	229.3
1A_3	Tdurum_contig56538_337	229.3
1A_3	wsnp_BE403322A_Ta_1_1	229.3
1A_3	wsnp_Ex_c28149_37293117	229.3
1A_3	BS00067119_51	229.3
1A_3	BS00065268_51	229.8
1A_3	RAC875_c16136_129	230.3
1A_3	Tdurum_contig34826_234	230.3
1A_3	wsnp_Ex_rep_c66919_65342127	230.3
1A_3	wsnp_Ex_rep_c81556_76277906	230.3
1A_3	Tdurum_contig5711_320	230.3
1A_3	Ra_c29200_300	230.8
1A_3	Tdurum_contig51833_439	230.8
1A_3	wsnp_BE494527A_Ta_2_1	230.8
1B_1	TA006040-0724	0
1B_1	RAC875_c62503_372	0
1B_1	Kukri_c38553_67	1.2
1B_1	BS00023084_51	1.2
1B_1	RAC875_c3692_2287	3.3
1B_1	BobWhite_c2092_519	6.8
1B_1	BS00068429_51	6.8
1B_1	BS00070706_51	6.8
1B_1	BS00103677_51	6.8
1B_1	RFL_Contig5637_1008	6.8
1B_1	wsnp_BE637971B_Ta_1_20	6.8
1B_1	GENE-4832_103	6.8
1B_1	Tdurum_contig47083_278	6.8
1B_1	Kukri_rep_c92398_80	6.8
1B_1	BS00081734_51	6.8
1B_1	BS00011608_51	6.8
1B_1	JD_c49343_430	6.8
1B_1	BS00006820_51	7.3
1B_1	BS00022564_51	7.3
1B_1	Excalibur_c26496_352	7.8
1B_1	Tdurum_contig58525_304	9.3
1B_1	wsnp_Ex_c1493_2862065	9.3
1B_1	BobWhite_c28295_256	9.3
1B_1	Kukri_c34536_259	9.3
1B_1	BS00029539_51	9.9
1B_1	BS00062726_51	9.9
1B_1	BS00072113_51	9.9
1B_1	Kukri_c8211_401	10.6
1B_1	TA003247-1072	10.6
1B_1	Tdurum_contig76266_134	11.1
1B_1	Tdurum_contig16797_148	14.5
1B_1	RFL_Contig5906_387	14.5
1B_1	RFL_Contig5906_310	14.5
1B_1	RFL_Contig5906_694	14.5
1B_1	Jagger_c8952_170	14.5
1B_1	Kukri_c79135_136	14.5
1B_1	CAP7_c3847_204	15.1
1B_1	RFL_Contig4104_3352	17.6
1B_1	RAC875_c41114_486	17.6
1B_1	BobWhite_c17044_155	18.6
1B_1	Tdurum_contig50667_299	18.6
1B_1	Tdurum_contig78972_251	19.1
1B_1	BobWhite_c39269_243	19.1
1B_1	Tdurum_contig78972_316	19.1
1B_1	Excalibur_c415_844	22.1
1B_1	Kukri_c7528_1044	22.1
1B_1	Tdurum_contig403_122	22.1
1B_1	Tdurum_contig403_290	22.1
1B_1	D_contig70818_696	22.6
1B_1	Tdurum_contig41904_446	22.6
1B_1	RAC875_c51663_87	25.6
1B_1	Ex_c64327_523	26.1
1B_1	GENE-4668_244	26.1
1B_1	IAAV7541	26.1
1B_1	TA005995-0488	26.1
1B_1	Tdurum_contig56188_569	26.1
1B_1	Tdurum_contig61324_305	26.1
1B_1	Tdurum_contig61324_473	26.1
1B_1	Tdurum_contig61410_467	26.1
1B_1	Tdurum_contig61410_542	26.1
1B_1	Tdurum_contig61410_59	26.1
1B_1	IAAV468	26.1
1B_1	wsnp_BE405834B_Ta_2_2	26.1
1B_1	Excalibur_c14273_1928	26.1
1B_1	Excalibur_c34148_481	26.1
1B_1	RAC875_c41129_455	26.1
1B_1	wsnp_BE405834B_Ta_2_3	26.1
1B_1	GENE-1756_115	26.6
1B_1	Tdurum_contig44861_237	26.6
1B_1	wsnp_Ex_c5780_10153638	26.6
1B_1	wsnp_Ku_c2620_4980121	26.6
1B_1	BS00042197_51	27.6
1B_1	BobWhite_c26045_230	28.1
1B_1	BS00081195_51	28.1
1B_1	GENE-0689_791	28.1
1B_1	Kukri_c47342_73	28.1
1B_1	BS00065053_51	28.1
1B_1	BS00067003_51	28.1
1B_1	Tdurum_contig60037_197	28.1
1B_1	Tdurum_contig60037_528	28.1
1B_1	Tdurum_contig83093_370	28.1
1B_1	IACX16577	31.1
1B_1	BS00067567_51	31.1
1B_1	Kukri_c83200_268	31.1
1B_1	BS00065737_51	31.6
1B_1	Kukri_c60285_505	31.6
1B_1	Kukri_rep_c100936_449	31.6
1B_1	Tdurum_contig9762_314	31.6
1B_1	Tdurum_contig98378_452	31.6
1B_1	GENE-0427_442	31.6
1B_2	RFL_Contig2160_617	0
1B_2	Tdurum_contig56148_382	0
1B_2	Ku_c2820_1430	0
1B_2	Excalibur_c95656_129	0
1B_2	Tdurum_contig17609_308	1
1B_2	D_contig25392_201	1
1B_2	Tdurum_contig17609_117	1
1B_2	IACX502	1
1B_2	Ra_c29142_340	1
1B_2	Tdurum_contig95654_237	1
1B_2	BS00087787_51	2
1B_2	Kukri_c51268_248	9.6
1B_2	RAC875_c39721_709	27.1
1B_2	Tdurum_contig57247_482	28.1
1B_2	RAC875_c22350_1108	28.1
1B_2	Tdurum_contig42217_127	28.1
1B_2	Tdurum_contig43910_687	28.1
1B_2	Tdurum_contig43910_1113	28.1
1B_2	Tdurum_contig43910_1429	28.1
1B_2	wsnp_BE403956B_Ta_2_3	28.1
1B_2	wsnp_BE442716B_Ta_2_2	28.6
1B_2	BS00094498_51	29.1
1B_2	Tdurum_contig87816_268	29.1
1B_2	Kukri_c13968_1342	29.1
1B_2	Tdurum_contig10955_429	29.1
1B_2	BobWhite_c11460_291	29.1
1B_2	BS00022581_51	29.1
1B_2	BS00060270_51	29.1
1B_2	Tdurum_contig28899_127	29.1
1B_2	IAAV1714	29.1
1B_2	Excalibur_c57972_116	29.1
1B_2	Tdurum_contig11087_181	29.6
1B_2	RAC875_c61851_238	29.6
1B_2	Tdurum_contig49660_719	29.6
1B_2	GENE-0283_96	30.2
1B_2	Kukri_c20927_339	30.2
1B_2	BS00110149_51	30.2
1B_2	Tdurum_contig61854_831	30.2
1B_2	wsnp_BE591501B_Ta_2_1	30.2
1B_2	Tdurum_contig70555_81	30.2
1B_2	GENE-0045_73	30.2
1B_2	Tdurum_contig57731_412	30.7
1B_2	IACX5814	30.7
1B_2	Tdurum_contig57731_162	30.7
1B_2	GENE-3085_533	30.7
1B_2	BS00076696_51	30.7
1B_2	Tdurum_contig77676_464	30.7
1B_2	BS00071083_51	30.7
1B_2	Kukri_c12151_467	30.7
1B_2	Tdurum_contig29676_141	30.7
1B_2	Kukri_c12151_769	30.7
1B_2	RAC875_c24337_1280	30.7
1B_2	Tdurum_contig25434_209	30.7
1B_2	Tdurum_contig25434_218	30.7
1B_2	Tdurum_contig57731_225	30.7
1B_2	BS00038928_51	31.7
1B_2	Tdurum_contig32033_125	31.7
1B_2	Tdurum_contig23640_281	31.7
1B_2	Tdurum_contig28305_106	31.7
1B_2	Tdurum_contig29228_114	31.7
1B_2	Tdurum_contig32033_334	31.7
1B_2	Tdurum_contig82366_354	31.7
1B_2	Tdurum_contig42129_1454	31.7
1B_2	BS00110480_51	32.2
1B_2	BS00011390_51	32.7
1B_2	Tdurum_contig57700_204	32.7
1B_2	Tdurum_contig62113_343	32.7
1B_2	BS00022324_51	33.2
1B_2	IACX5764	33.2
1B_2	Tdurum_contig15660_376	33.2
1B_2	Tdurum_contig48063_1879	33.2
1B_2	Tdurum_contig48171_189	33.2
1B_2	Tdurum_contig7109_954	33.2
1B_2	Tdurum_contig12701_490	33.2
1B_2	Tdurum_contig70846_226	33.2
1B_2	BS00073132_51	33.8
1B_2	tplb0023b14_704	33.8
1B_2	wsnp_JD_c4485_5618761	33.8
1B_2	wsnp_Ku_c4951_8856170	33.8
1B_2	wsnp_Ex_c17452_26163465	33.8
1B_2	wsnp_Ra_c8484_14372772	33.8
1B_2	wsnp_Ex_rep_c67036_65492436	33.8
1B_2	Tdurum_contig45357_821	34.3
1B_2	RAC875_c38410_95	34.8
1B_2	Tdurum_contig28668_124	34.8
1B_2	TA006157-0542	35.3
1B_2	BS00108497_51	35.3
1B_2	IAAV5704	37.9
1B_2	RAC875_s105188_92	37.9
1B_2	wsnp_CAP7_c940_480745	37.9
1B_2	wsnp_Ex_c2025_3799847	37.9
1B_2	wsnp_Ex_c3681_6715277	37.9
1B_2	wsnp_Ex_c3681_6716255	37.9
1B_2	wsnp_Ra_c2027_3943938	37.9
1B_2	wsnp_Ra_c2027_3945713	37.9
1B_2	wsnp_Ra_c2027_3945764	37.9
1B_2	Kukri_c51474_334	37.9
1B_2	Tdurum_contig20191_171	37.9
1B_2	wsnp_Ra_c23758_33291657	37.9
1B_2	Ra_c3083_982	38.4
1B_2	wsnp_Ex_c34966_43196962	38.4
1B_2	wsnp_Ex_rep_c68712_67571580	38.4
1B_2	BobWhite_rep_c66032_270	39.4
1B_2	wsnp_BE443332B_Ta_2_2	39.4
1B_2	Tdurum_contig98080_171	45.5
1B_2	RAC875_c87890_234	46.5
1B_2	Tdurum_contig59449_249	46.5
1B_2	TA003238-0490	46.5
1B_2	Tdurum_contig59449_400	46.5
1B_2	Tdurum_contig59449_1462	46.5
1B_2	GENE-0107_807	48.5
1B_2	Tdurum_contig31094_386	48.5
1B_2	wsnp_Ex_c6611_11451949	48.5
1B_2	wsnp_Ex_c6611_11452297	48.5
1B_2	IACX3408	49
1B_2	Tdurum_contig29363_461	49
1B_2	Tdurum_contig29363_511	49
1B_2	Tdurum_contig30195_318	49
1B_2	Tdurum_contig44232_132	49
1B_2	Ku_c20478_390	49.5
1B_2	BS00022920_51	52.5
1B_2	wsnp_Ex_c4561_8184576	52.5
1B_2	JD_c3116_778	52.5
1B_2	RAC875_c19014_725	53
1B_2	BS00022022_51	54
1B_2	BS00090201_51	54
1B_2	BS00022619_51	55
1B_2	BS00022343_51	55.5
1B_2	BS00107799_51	55.5
1B_2	Tdurum_contig32584_219	55.5
1B_2	BS00085546_51	55.5
1B_2	IAAV9005	56
1B_2	Tdurum_contig81102_102	56
1B_2	RAC875_rep_c119728_146	56
1B_2	TA003725-0553	56
1B_2	Kukri_c13188_256	60.5
1B_2	Kukri_c7905_226	60.5
1B_2	Tdurum_contig60509_232	60.5
1B_2	wsnp_Ex_c5679_9976893	60.5
1B_2	wsnp_Ra_c19148_28288923	60.5
1B_2	BobWhite_c26850_78	68.1
1B_2	CAP12_c424_402	68.1
1B_2	BS00000066_51	69.6
1B_2	Tdurum_contig31102_299	69.6
1B_2	BobWhite_c16005_289	70.6
1B_2	BS00010130_51	70.6
1B_2	IACX11291	70.6
1B_2	IACX9097	70.6
1B_2	IACX9622	70.6
1B_2	Tdurum_contig87938_342	70.6
1B_2	wsnp_JD_c11014_11565501	70.6
1B_2	Excalibur_rep_c104902_106	70.6
1B_2	IACX9510	70.6
1B_2	RAC875_c8888_802	70.6
1B_2	RAC875_s110519_303	70.6
1B_2	Ex_c102909_778	71.5
1B_2	Excalibur_c48379_413	71.5
1B_2	Kukri_c27693_551	71.5
1B_2	Excalibur_c23992_436	71.5
1B_2	Excalibur_c48379_116	71.5
1B_2	Kukri_c27693_260	71.5
1B_2	Kukri_c27693_710	71.5
1B_2	Ra_c62804_1641	71.5
1B_2	BS00010399_51	71.5
1B_2	Kukri_rep_c104054_174	71.5
1B_2	CAP12_c1129_220	73.7
1B_2	RFL_Contig4977_2333	74.2
1B_2	BobWhite_c16280_521	74.7
1B_2	BS00065126_51	75.7
1B_2	Kukri_c73734_175	76.2
1B_2	RAC875_c7674_634	76.2
1B_2	BS00066007_51	76.7
1B_2	wsnp_BG274294B_Ta_2_3	79.7
1B_2	BS00048610_51	80.7
1B_2	RAC875_c22886_235	81.2
1B_2	wsnp_Ex_c5245_9283053	81.7
1B_2	CAP8_c4697_108	81.7
1B_2	Excalibur_c4459_1867	81.7
1B_2	Ku_c241_460	81.7
1B_2	Ku_c4348_862	81.7
1B_2	Ku_c9614_1657	81.7
1B_2	RAC875_c3835_782	81.7
1B_2	RAC875_rep_c109215_398	81.7
1B_2	Tdurum_contig22253_213	81.7
1B_2	Tdurum_contig64811_273	81.7
1B_2	Ex_c402_1223	81.7
1B_2	Excalibur_c17977_71	81.7
1B_2	IAAV4729	81.7
1B_2	IAAV6383	81.7
1B_2	IAAV8432	81.7
1B_2	JD_c13631_863	81.7
1B_2	Ku_c23096_550	81.7
1B_2	Ku_c241_1597	81.7
1B_2	Ku_c892_425	81.7
1B_2	Kukri_c1918_1074	81.7
1B_2	Kukri_c66451_128	81.7
1B_2	RAC875_c1045_445	81.7
1B_2	Tdurum_contig42749_3287	81.7
1B_2	Tdurum_contig42797_1576	81.7
1B_2	Tdurum_contig42797_2922	81.7
1B_2	Tdurum_contig42797_3196	81.7
1B_2	Tdurum_contig42797_4145	81.7
1B_2	Tdurum_contig44540_510	81.7
1B_2	Tdurum_contig64811_332	81.7
1B_2	Tdurum_contig892_633	81.7
1B_2	wsnp_Ex_c402_791233	81.7
1B_2	wsnp_JD_c6331_7499499	81.7
1B_2	wsnp_Ku_c23096_32987510	81.7
1B_2	Kukri_c18413_496	81.7
1B_2	Kukri_c22352_270	81.7
1B_2	Kukri_c53642_89	81.7
1B_2	IAAV3567	82.2
1B_2	Ku_c3647_2429	82.2
1B_2	Ku_c3647_769	82.2
1B_2	Kukri_rep_c111676_103	82.2
1B_2	BS00096719_51	84.2
1B_2	GENE-0120_397	84.2
1B_2	wsnp_Ex_c1440_2764269	84.7
1B_2	wsnp_Ex_c1440_2764867	84.7
1B_2	BobWhite_c48550_198	88.2
1B_2	Tdurum_contig42755_1086	88.2
1B_2	Excalibur_c16203_451	89.2
1B_2	BS00021975_51	89.7
1B_2	BS00084530_51	89.7
1B_2	BS00081396_51	90.2
1B_2	CAP8_rep_c7343_88	90.2
1B_2	wsnp_Ex_rep_c101231_86636951	90.7
1B_2	BobWhite_rep_c57575_65	91.7
1B_2	Excalibur_c6892_274	91.7
1B_2	RAC875_c32687_153	91.7
1B_2	Kukri_c28631_607	93.2
1B_2	Tdurum_contig65528_152	93.7
1B_2	BobWhite_c7337_717	95.7
1B_2	BS00098413_51	95.7
1B_2	Tdurum_contig29616_55	95.7
1B_2	Tdurum_contig29616_817	95.7
1B_2	Tdurum_contig29616_844	95.7
1B_2	Tdurum_contig45301_876	95.7
1B_2	Tdurum_contig64955_285	95.7
1B_2	Tdurum_contig92854_426	95.7
1B_2	Excalibur_c50079_420	96.2
1B_2	IACX9183	96.2
1B_2	wsnp_Ex_rep_c66389_64589189	96.7
1B_2	BS00060100_51	97.7
1B_2	Kukri_c45852_78	99.2
1B_2	RAC875_c36737_316	99.7
1B_2	wsnp_Ex_c22439_31632880	100.7
1B_2	Excalibur_c12994_1060	102.7
1B_2	Ku_c106533_550	102.7
1B_2	JD_c107_683	103.7
1B_2	Tdurum_contig8158_269	104.7
1B_2	Excalibur_c9149_1789	111.2
1B_2	BS00062880_51	111.2
1B_2	Excalibur_c112015_118	111.2
1B_2	Excalibur_c9149_1326	111.2
1B_2	Tdurum_contig30517_174	111.2
1B_2	BS00024320_51	112.7
1B_2	wsnp_Ku_c13043_20902807	112.7
1B_2	wsnp_CAP11_c287_244799	112.7
1B_2	Kukri_c39698_228	112.7
1B_2	wsnp_Ex_rep_c107911_91350866	112.7
1B_2	wsnp_Ex_rep_c107911_91350930	112.7
1B_2	Ra_c2748_671	112.7
1B_2	wsnp_Ex_c21198_30326388	112.7
1B_2	wsnp_Ra_c2748_5223434	112.7
1B_2	wsnp_Ex_c21198_30327016	112.7
1B_2	wsnp_Ex_c7585_12957020	113.2
1B_2	wsnp_RFL_Contig2686_2383517	113.2
1B_2	wsnp_Ku_c17017_26019611	113.2
1B_2	IAAV420	113.2
1B_2	RAC875_c1188_531	113.2
1B_2	Tdurum_contig11720_924	113.2
1B_2	IAAV2683	114.7
1B_2	IACX6346	114.7
1B_2	Kukri_c25961_166	114.7
1B_2	RAC875_c103613_441	114.7
1B_2	RAC875_rep_c106876_446	114.7
1B_2	Tdurum_contig13117_1316	114.7
1B_2	RFL_Contig2484_1065	114.7
1B_2	Excalibur_c27915_560	116.7
1B_2	Kukri_c9752_793	117.7
1B_2	RAC875_c1413_597	117.7
1B_2	Tdurum_contig11896_550	117.7
1B_2	Tdurum_contig69792_167	117.7
1B_2	BS00022551_51	121.7
1B_2	Kukri_c11547_1526	123.2
1B_2	RAC875_c1136_867	123.2
1B_2	BS00004328_51	123.2
1B_2	BS00026338_51	123.2
1B_2	BS00066338_51	123.2
1B_2	BS00066944_51	123.2
1B_2	BS00069125_51	123.2
1B_2	BS00100853_51	123.2
1B_2	IACX2852	123.2
1B_2	IACX6404	123.2
1B_2	RFL_Contig7_380	123.2
1B_2	TA005251-0278	123.2
1B_2	Tdurum_contig28233_106	123.2
1B_2	wsnp_Ex_rep_c67299_65844168	123.2
1B_2	wsnp_Ex_rep_c67299_65845319	123.2
1B_2	RAC875_c31133_198	123.2
1B_2	BS00000651_51	123.2
1B_2	RAC875_c60269_205	123.7
1B_2	Kukri_c3187_1062	125.2
1B_2	GENE-3046_367	128.2
1B_2	BS00062607_51	129.2
1B_2	Kukri_c8061_98	129.2
1B_2	Tdurum_contig30536_152	129.2
1B_2	BS00012029_51	135.7
1B_2	Excalibur_rep_c101787_89	135.7
1B_2	Kukri_rep_c104113_252	135.7
1B_2	wsnp_Ex_c29186_38247956	136.2
1B_2	IACX7705	136.2
1B_2	BS00023940_51	139.2
1B_2	BS00023941_51	139.2
1B_2	D_contig09918_483	141.9
1B_2	BobWhite_c34030_646	141.9
1B_2	RAC875_c16136_1597	141.9
1B_2	RFL_Contig2826_1274	141.9
1B_2	RFL_Contig2826_614	141.9
1B_2	IAAV8459	142.4
1B_2	wsnp_Ex_c2569_4780450	142.4
1B_2	BS00081749_51	143.4
1B_2	BS00083060_51	143.4
1B_2	RAC875_c47427_235	143.4
1B_2	BobWhite_c42716_71	143.9
1B_2	BS00067436_51	143.9
1B_2	BS00110231_51	143.9
1B_2	Excalibur_c40808_441	143.9
1B_2	Excalibur_rep_c72368_68	143.9
1B_2	RAC875_c47427_75	143.9
1B_2	RAC875_c47741_227	143.9
1B_2	RFL_Contig5937_1677	143.9
1B_2	wsnp_Ex_rep_c66255_64400455	143.9
1B_2	Excalibur_rep_c96924_118	143.9
1B_2	Excalibur_c581_1220	144.9
1B_2	RAC875_c291_696	147.5
1B_2	Tdurum_contig11130_90	150.1
1B_2	Tdurum_contig41945_748	150.6
1B_2	BobWhite_c16543_993	151.1
1B_2	Tdurum_contig57479_236	151.1
1B_2	Tdurum_contig67656_58	151.1
1B_2	Tdurum_contig67656_387	151.1
1B_2	JD_c9300_552	151.6
1B_2	wsnp_Ex_c26083_35336771	151.6
1B_2	BobWhite_c11309_738	151.6
1B_2	BobWhite_c9881_1312	154.1
1B_2	IACX11634	154.1
1B_2	wsnp_Ku_c18227_27490539	154.1
1B_2	RAC875_c66649_186	154.1
1B_2	BS00022249_51	155.9
1B_2	BS00022411_51	155.9
1B_2	BS00034450_51	155.9
1B_2	BS00072791_51	155.9
1B_2	Tdurum_contig19125_215	155.9
1B_2	Tdurum_contig25486_89	155.9
1B_2	Tdurum_contig49651_227	155.9
1B_2	Tdurum_contig49651_546	155.9
1B_2	Tdurum_contig57927_171	155.9
1B_2	Tdurum_contig65853_242	155.9
1B_2	Tdurum_contig65853_534	155.9
1B_2	Tdurum_contig67368_157	155.9
1B_2	wsnp_Ex_c5296_9365528	155.9
1B_2	wsnp_Ex_c5296_9365847	155.9
1B_2	wsnp_Ex_c5296_9365860	155.9
1B_2	BS00021938_51	156.4
1B_2	BS00096498_51	156.4
1B_2	IACX2961	156.4
1B_2	Jagger_c7235_96	156.4
1B_2	CAP12_c544_164	158.4
1B_2	Excalibur_c56999_109	158.4
1B_2	Excalibur_c85432_106	158.4
1B_2	Ra_c17685_927	158.4
1B_2	RAC875_c42275_224	158.4
1B_2	Tdurum_contig43232_1012	158.4
1B_2	Tdurum_contig43232_811	158.4
1B_2	tplb0052l08_708	158.4
1B_2	wsnp_Ex_c15796_24173348	158.4
1B_2	BS00067525_51	159
1B_2	BobWhite_c36862_84	159
1B_2	BS00003633_51	159
1B_2	BS00065257_51	159
1B_2	Excalibur_c37496_271	159
1B_2	JD_c3082_514	159
1B_2	Kukri_c51735_79	159
1B_2	Ra_c2772_4514	159
1B_2	RAC875_c22357_1053	159
1B_2	RAC875_c35729_1215	159
1B_2	RAC875_c4190_337	159
1B_2	RAC875_c50684_155	159
1B_2	TA001769-0538	159
1B_2	Tdurum_contig11077_122	159
1B_2	Tdurum_contig16606_648	159
1B_2	Tdurum_contig11077_342	159
1B_2	Tdurum_contig274_114	160
1B_2	Tdurum_contig15410_446	161.2
1B_2	IAAV2619	164.9
1B_2	BS00094237_51	164.9
1B_2	BS00089790_51	164.9
1B_2	CAP11_c6406_104	164.9
1B_2	CAP11_c6406_71	164.9
1B_2	Tdurum_contig81273_475	164.9
1B_2	tplb0053e09_1284	164.9
1B_2	wsnp_Ex_c34765_43024979	166.4
1B_2	Kukri_c39223_871	166.4
1B_2	BobWhite_c2027_215	166.9
1B_2	Kukri_c39223_831	166.9
1B_2	BobWhite_c5242_400	168.4
1B_2	Tdurum_contig32775_78	168.4
1B_2	Tdurum_contig42491_666	168.4
1B_2	wsnp_RFL_Contig2171_1489615	168.4
1B_2	wsnp_Ku_rep_c107952_93214466	172.9
1B_2	IAAV7428	172.9
1B_2	RAC875_c818_1185	172.9
1B_2	wsnp_Ex_c48677_53513032	174.3
1B_2	wsnp_Ku_c18881_28259811	174.3
1B_2	wsnp_Ku_c51703_56915288	174.3
1B_3	GENE-0129_110	0
1B_3	RAC875_rep_c111494_195	0
1B_3	GENE-0163_949	0.5
1B_3	BobWhite_c39901_338	0.5
1B_3	BobWhite_c44460_821	0.5
1B_3	BS00079088_51	0.5
1B_3	GENE-0129_214	0.5
1B_3	TA004059-0492	0.5
1B_3	RAC875_c49225_66	1
1B_3	GENE-0208_688	1.5
1B_3	GENE-0208_695	1.5
1B_3	RAC875_c23586_493	1.5
1B_3	Tdurum_contig57153_1356	2.5
1B_3	Excalibur_c22205_573	2.5
1B_3	Tdurum_contig68980_448	2.5
1B_3	IACX8074	8
1B_3	GENE-0416_480	8
1B_3	IACX9290	8
1B_3	BS00078414_51	8.5
1B_3	BS00078413_51	9
1B_3	Tdurum_contig18557_228	9.5
1B_3	wsnp_CAP12_c1337_682282	9.5
1B_3	Kukri_rep_c101649_404	9.5
1B_3	Excalibur_rep_c71107_517	9.5
1B_3	IACX2234	9.5
1B_3	Tdurum_contig55429_116	9.5
1B_3	Tdurum_contig55429_147	9.5
1B_3	Tdurum_contig75589_317	9.5
1B_3	Kukri_c18230_1633	10.5
1B_3	IAAV5949	10.5
1B_3	wsnp_RFL_Contig2403_1927045	11.5
1B_3	wsnp_Ra_c53181_56932563	11.5
1B_3	Kukri_c11000_1769	12.5
1B_3	RAC875_c4047_115	12.5
1B_3	Excalibur_c88292_81	12.5
1B_3	Jagger_c2152_123	12.5
1B_3	BobWhite_c9963_51	12.5
1B_3	RAC875_c9082_267	15.6
1B_3	Tdurum_contig4904_2923	15.6
1B_3	wsnp_Ex_c38849_46284348	15.6
1B_3	Tdurum_contig61914_169	17.6
1B_3	CAP7_rep_c6352_375	18.6
1B_3	Tdurum_contig4838_349	18.6
1B_3	Tdurum_contig4838_519	18.6
1B_3	Tdurum_contig4838_718	18.6
1B_3	Tdurum_contig4997_1022	18.6
1B_3	Tdurum_contig4997_166	18.6
1B_3	Tdurum_contig4997_178	18.6
1B_3	Tdurum_contig4997_816	18.6
1B_3	Tdurum_contig4997_974	18.6
1B_3	TA002215-1444	18.6
1B_3	Excalibur_c15389_501	18.6
1B_3	Kukri_c8395_1352	18.6
1B_3	wsnp_Ex_c4436_7981188	19.1
1B_3	BS00000010_51	28.8
1B_3	BS00073763_51	29.8
1B_3	GENE-0514_210	29.8
1B_3	Tdurum_contig93330_263	29.8
1B_3	Tdurum_contig94450_255	29.8
1B_3	BobWhite_rep_c50057_164	29.8
1B_3	BobWhite_s64871_104	29.8
1B_3	BS00083500_51	29.8
1B_3	Tdurum_contig93330_656	29.8
1B_3	IAAV1913	29.8
1B_3	Kukri_c1259_864	30.3
1B_3	Excalibur_c11190_617	31.8
1B_3	Kukri_c376_3063	31.8
1B_3	Tdurum_contig62905_165	31.8
1B_3	BobWhite_c16824_151	32.3
1B_3	CAP7_c1788_66	32.3
1B_3	IAAV6011	32.3
1B_3	wsnp_CAP11_c2596_1325540	32.8
1B_3	Tdurum_contig46647_623	33.8
1B_3	BS00084990_51	34.3
1B_3	IACX17310	34.3
1B_3	BS00060686_51	35.3
1B_3	BS00103710_51	35.3
1B_3	BS00065694_51	35.8
1B_3	BS00107837_51	35.8
1B_3	BS00066305_51	38.8
1B_3	Excalibur_c14102_459	38.8
1B_3	Kukri_c20495_1745	39.3
1B_3	Kukri_rep_c111710_80	39.3
1B_3	Tdurum_contig76653_295	39.3
1B_3	wsnp_Ra_rep_c97840_85062404	39.3
1B_3	BobWhite_c6433_417	39.3
1B_3	RAC875_c14613_112	39.3
1B_3	RAC875_c14613_68	39.3
1B_3	RAC875_c24317_1351	39.3
1B_3	RAC875_c24317_2239	39.3
1B_3	RAC875_c24317_268	39.3
1B_3	RAC875_rep_c71278_345	39.3
1B_3	Tdurum_contig63370_207	39.3
1B_3	wsnp_Ku_c40759_48907151	39.3
1B_3	wsnp_Ra_rep_c97840_85062318	39.3
1B_3	RAC875_c24317_1201	39.3
1B_3	Kukri_c14292_157	39.8
1B_3	Excalibur_c62486_205	40.8
1B_3	BS00063686_51	40.8
1B_3	D_contig03023_692	40.8
1B_3	Excalibur_c38500_494	40.8
1B_3	Tdurum_contig41999_2908	40.8
1B_3	Tdurum_contig41999_3220	40.8
1B_3	BobWhite_c12960_168	40.8
1B_3	BS00024107_51	40.8
1B_3	Tdurum_contig52086_488	40.8
1B_3	RAC875_rep_c105597_205	40.8
1B_3	Tdurum_contig52086_108	40.8
1B_3	BobWhite_c20073_443	40.8
1B_3	RFL_Contig785_1700	40.8
1B_3	RFL_Contig785_535	40.8
1B_3	BobWhite_c34125_183	40.8
1B_3	BS00033776_51	40.8
1B_3	BS00063302_51	40.8
1B_3	BS00093275_51	40.8
1B_3	CAP11_c7969_315	40.8
1B_3	Excalibur_c35289_64	40.8
1B_3	Tdurum_contig52086_129	40.8
1B_3	Tdurum_contig52086_264	40.8
1B_3	Tdurum_contig52086_342	40.8
1B_3	Tdurum_contig52086_524	40.8
1B_3	tplb0049h18_765	40.8
1B_3	wsnp_Ex_rep_c88749_79992654	40.8
1B_3	wsnp_Ku_c2797_5284087	40.8
1B_3	BobWhite_c11949_788	42.8
1B_3	Tdurum_contig13879_352	42.8
1B_3	Tdurum_contig13879_429	42.8
1B_3	Excalibur_c39284_949	43.3
1B_3	Excalibur_c5888_169	43.3
1B_3	Excalibur_c5888_641	43.3
1B_3	Kukri_c59535_186	43.3
1B_3	Tdurum_contig13879_919	43.3
1B_3	Kukri_c59535_393	43.3
1B_3	GENE-0543_201	45.8
1B_3	BobWhite_c34379_178	48.8
1B_3	Kukri_c29687_369	48.8
1B_3	Kukri_c94613_316	48.8
1B_3	RAC875_rep_c109804_216	48.8
1B_3	Tdurum_contig49509_456	48.8
1B_3	Kukri_c46030_412	48.8
1B_3	Excalibur_rep_c69522_83	49.3
1B_3	BS00064948_51	49.3
1B_3	Kukri_c94613_637	49.3
1B_3	Kukri_rep_c110309_69	49.3
1B_3	Kukri_rep_c111174_132	49.3
1B_3	RAC875_c5882_307	49.3
1B_3	Tdurum_contig80264_1014	49.3
1B_3	Excalibur_c35345_476	49.7
1B_3	Tdurum_contig44851_888	49.7
1B_3	Tdurum_contig44851_927	49.7
1B_3	Tdurum_contig44851_987	49.7
1B_3	Tdurum_contig4851_653	49.7
1B_3	Tdurum_contig49509_606	49.7
1B_3	Kukri_c16608_761	53.9
1B_3	Kukri_c16608_659	53.9
1B_3	Tdurum_contig42960_865	53.9
1B_3	Tdurum_contig58710_411	53.9
1B_3	Tdurum_contig58710_516	53.9
1B_3	Tdurum_contig83965_208	53.9
1B_3	Tdurum_contig92835_177	53.9
1B_3	RFL_Contig2550_679	54.4
1B_3	Tdurum_contig51922_676	54.4
1B_3	BobWhite_c7691_195	54.4
1B_3	BS00001128_51	54.4
1B_3	Excalibur_c25640_110	54.4
1B_3	BS00027006_51	54.9
1B_3	RAC875_c37075_283	54.9
1B_3	wsnp_Ku_c13952_22097856	54.9
1B_3	wsnp_Ku_c13952_22097895	55.4
2A_1	Kukri_c91621_386	0
2A_1	wsnp_Ex_rep_c66270_64420584	0
2A_1	BS00083727_51	5.5
2A_1	Kukri_c24669_1235	35.7
2A_1	Tdurum_contig45838_263	37.7
2A_1	wsnp_BG274584B_Ta_2_3	47.9
2A_1	wsnp_BG274584B_Ta_2_1	47.9
2A_1	Tdurum_contig80351_311	55
2A_1	RAC875_rep_c69365_347	59.1
2A_1	Tdurum_contig14707_251	59.1
2A_2	RAC875_rep_c69619_78	0
2A_2	Kukri_c22047_313	0.5
2A_2	RAC875_rep_c69619_145	0.5
2A_2	wsnp_CAP11_c1711_934478	0.5
2A_2	wsnp_Ex_c41007_47932833	0.5
2A_2	Excalibur_c7665_260	1
2A_2	Kukri_c52402_292	1
2A_2	wsnp_Ex_rep_c102390_87572532	1
2A_2	wsnp_Ku_c33884_43306422	1
2A_2	BS00108865_51	3.5
2A_2	RAC875_c104160_61	3.5
2A_2	RAC875_c19904_308	3.5
2A_2	tplb0046b02_872	3.5
2A_2	Tdurum_contig45661_684	8.4
2A_2	Tdurum_contig60298_468	8.4
2A_2	Tdurum_contig4976_1138	8.9
2A_2	Tdurum_contig60205_509	8.9
2A_2	Tdurum_contig60205_806	8.9
2A_2	Tdurum_contig93508_119	8.9
2A_2	wsnp_Ex_c45_97816	8.9
2A_2	wsnp_Ex_c45_98113	8.9
2A_2	Tdurum_contig60298_219	8.9
2A_2	RAC875_c33037_578	11.9
2A_2	BS00003663_51	12.9
2A_2	IACX5800	12.9
2A_2	BobWhite_c17783_174	16.1
2A_2	BS00030165_51	16.1
2A_2	Kukri_rep_c68300_216	16.1
2A_2	Tdurum_contig6086_269	16.1
2A_2	BS00022409_51	16.6
2A_2	Tdurum_contig49145_914	16.6
2A_2	Tdurum_contig86183_177	16.6
2A_2	Tdurum_contig86183_221	16.6
2A_2	Excalibur_c3727_1773	17.1
2A_2	IACX4345	30.9
2A_2	wsnp_Ex_c14639_22695091	38.4
2A_2	BS00071350_51	38.9
2A_2	Ra_c13654_1529	38.9
2A_2	wsnp_Ku_c4045_7380115	38.9
2A_2	BobWhite_c42181_327	39.4
2A_2	Excalibur_c39151_104	39.4
2A_2	Excalibur_c44834_80	39.4
2A_2	RAC875_c21750_784	39.4
2A_2	wsnp_Ku_c26323_36285601	39.4
2A_2	wsnp_Ku_c26323_36285697	39.4
2A_2	Tdurum_contig52350_636	41.3
2A_2	wsnp_Ex_c3695_6740063	41.3
2A_2	Excalibur_c7971_1573	41.3
2A_2	Ex_c36309_435	41.3
2A_2	Excalibur_c17000_557	41.3
2A_2	Tdurum_contig50720_482	42.4
2A_2	wsnp_BE498892A_Ta_2_25	42.4
2A_2	Tdurum_contig50720_204	42.4
2A_2	BS00010760_51	42.4
2A_2	IAAV6102	42.4
2A_2	Tdurum_contig49366_118	42.4
2A_2	Tdurum_contig52350_170	42.4
2A_2	Tdurum_contig52350_296	42.4
2A_2	RAC875_c1043_258	42.4
2A_2	Tdurum_contig14482_1013	42.4
2A_2	Tdurum_contig14482_1073	42.4
2A_2	JD_c11825_1135	42.4
2A_2	RFL_Contig4567_218	42.4
2A_2	Tdurum_contig92425_431	42.9
2A_2	BS00087932_51	42.9
2A_2	BS00010477_51	42.9
2A_2	BS00097473_51	42.9
2A_2	CAP12_c1380_238	42.9
2A_2	Excalibur_c62106_387	42.9
2A_2	Excalibur_c7971_712	42.9
2A_2	Excalibur_c7971_985	42.9
2A_2	IAAV4880	42.9
2A_2	IAAV5232	42.9
2A_2	Ku_c10387_272	42.9
2A_2	Kukri_c11099_1198	42.9
2A_2	Kukri_c30117_214	42.9
2A_2	Kukri_c44231_1576	42.9
2A_2	Ra_c2467_333	42.9
2A_2	RAC875_c22328_1356	42.9
2A_2	RAC875_c22328_490	42.9
2A_2	RAC875_c35688_382	42.9
2A_2	RAC875_c68651_391	42.9
2A_2	RFL_Contig5122_974	42.9
2A_2	Tdurum_contig42282_10323	42.9
2A_2	Tdurum_contig42282_11463	42.9
2A_2	Tdurum_contig50720_354	42.9
2A_2	Tdurum_contig52350_902	42.9
2A_2	Tdurum_contig53038_1287	42.9
2A_2	Tdurum_contig56321_179	42.9
2A_2	Tdurum_contig8350_243	42.9
2A_2	wsnp_Ex_c10555_17236072	42.9
2A_2	wsnp_Ex_c3695_6740111	42.9
2A_2	wsnp_Ku_c16547_25454123	42.9
2A_2	wsnp_Ku_c2838_5354231	42.9
2A_2	wsnp_Ku_c2838_5355065	42.9
2A_2	BS00077504_51	42.9
2A_2	Kukri_c21008_657	42.9
2A_2	Kukri_c25632_86	42.9
2A_2	Tdurum_contig52350_588	42.9
2A_2	Tdurum_contig9224_402	42.9
2A_2	Tdurum_contig92425_3144	42.9
2A_2	tplb0025l18_1788	42.9
2A_2	Tdurum_contig16904_167	42.9
2A_2	RAC875_c34370_332	42.9
2A_2	Excalibur_c923_837	42.9
2A_2	Ku_c72620_132	42.9
2A_2	RAC875_rep_c108836_55	42.9
2A_2	Tdurum_contig12556_183	42.9
2A_2	RAC875_c96399_610	42.9
2A_2	Excalibur_c91176_326	42.9
2A_2	wsnp_Ex_c905_1748920	42.9
2A_2	tplb0021g21_595	42.9
2A_2	BS00062869_51	46.9
2A_2	Tdurum_contig23578_138	48.9
2A_2	IAAV881	48.9
2A_2	Kukri_rep_c104982_217	48.9
2A_2	Kukri_c89717_64	48.9
2A_2	BobWhite_c923_208	48.9
2A_2	Tdurum_contig64286_268	50.4
2A_2	BS00007689_51	50.4
2A_2	Kukri_c36985_104	50.4
2A_2	Tdurum_contig64286_182	50.4
2A_2	BS00072914_51	50.4
2A_2	RAC875_c22214_142	50.4
2A_2	BS00022252_51	51
2A_2	wsnp_BG313362A_Ta_2_1	54.4
2A_2	wsnp_JD_c1872_2603061	54.4
2A_2	Jagger_c295_58	54.4
2A_2	Excalibur_c8919_345	54.9
2A_2	RFL_Contig1115_264	54.9
2A_2	RFL_Contig5277_1283	54.9
2A_2	BobWhite_rep_c48966_570	54.9
2A_2	Excalibur_c21501_237	55.9
2A_2	Excalibur_c21501_377	55.9
2A_2	RAC875_c75800_331	55.9
2A_2	Kukri_c34421_359	55.9
2A_2	JD_c10324_88	56.4
2A_2	Ku_c68144_972	56.4
2A_2	BobWhite_c25784_83	56.4
2A_2	RAC875_c1757_1183	56.4
2A_2	RAC875_c35807_1110	56.4
2A_2	Tdurum_contig42937_1564	56.4
2A_2	Tdurum_contig45196_487	56.4
2A_2	BS00012942_51	56.4
2A_2	IAAV7742	56.4
2A_2	BobWhite_rep_c63940_205	56.4
2A_2	Kukri_c67873_265	56.4
2A_2	RAC875_c63035_147	56.4
2A_2	Kukri_c18207_262	56.4
2A_2	Kukri_c5283_1035	56.4
2A_2	Excalibur_c9472_217	59.1
2A_2	BobWhite_c18406_110	68.6
2A_2	BS00011599_51	68.6
2A_2	wsnp_Ex_rep_c70934_69795145	68.6
2A_2	Ku_c25908_277	68.6
2A_2	RAC875_c48891_476	68.6
2A_2	Tdurum_contig67879_504	68.6
2A_2	BS00022510_51	69.2
2A_2	RFL_Contig4790_646	69.2
2A_2	wsnp_RFL_Contig2324_1803878	69.2
2A_2	Excalibur_c1999_1130	69.2
2A_2	IAAV2847	81.1
2A_2	GENE-4937_1435	82.6
2A_2	Ra_c72517_981	84.1
2A_2	BS00063578_51	84.6
2A_2	Excalibur_c28710_340	87.1
2A_2	Kukri_c365_345	88.1
2B_1	BobWhite_c9351_274	0
2B_1	Ra_c15365_530	0
2B_1	Tdurum_contig14442_1008	0
2B_1	wsnp_CAP7_c1453_728076	0
2B_1	BobWhite_c7326_70	2
2B_1	Excalibur_c99477_90	2
2B_1	JD_c2909_278	2
2B_1	Ku_c33341_260	2
2B_1	Kukri_c1877_121	2
2B_1	Kukri_c55599_153	2
2B_1	Ra_c106383_270	2
2B_1	Ra_c21042_617	2
2B_1	Kukri_c20819_497	3.9
2B_1	RAC875_c3039_101	3.9
2B_1	wsnp_Ex_c25438_34703568	3.9
2B_1	Kukri_c110148_53	7.8
2B_1	wsnp_Ex_c5363_9482943	7.8
2B_1	wsnp_Ex_rep_c69928_68889412	7.8
2B_1	wsnp_Ex_c17538_26261053	7.8
2B_1	wsnp_Ex_c11904_19091967	8.3
2B_1	wsnp_Ex_c2497_4666526	8.3
2B_1	wsnp_Ex_c43212_49594902	8.3
2B_1	wsnp_Ex_c4334_7816096	8.3
2B_1	wsnp_Ex_c52240_55911010	8.3
2B_1	wsnp_Ku_c33652_43115283	8.3
2B_1	wsnp_Ku_c691_1429483	8.3
2B_1	wsnp_Ku_rep_c100990_88230610	8.3
2B_1	BobWhite_c10453_396	8.3
2B_1	BobWhite_c11800_96	8.3
2B_1	BobWhite_c13455_112	8.3
2B_1	BobWhite_c3757_55	8.3
2B_1	BobWhite_rep_c48743_691	8.3
2B_1	BS00062485_51	8.3
2B_1	BS00076369_51	8.3
2B_1	CAP7_c2854_46	8.3
2B_1	CAP8_c621_57	8.3
2B_1	D_GDEEGVY01DXTWK_75	8.3
2B_1	Ex_c66545_1078	8.3
2B_1	Excalibur_c48957_395	8.3
2B_1	Excalibur_c60716_53	8.3
2B_1	Excalibur_c85610_72	8.3
2B_1	IAAV1987	8.3
2B_1	IAAV3148	8.3
2B_1	IAAV3295	8.3
2B_1	IACX1028	8.3
2B_1	Ku_c14843_504	8.3
2B_1	Ku_c46339_317	8.3
2B_1	Kukri_c11850_1711	8.3
2B_1	Kukri_c2507_962	8.3
2B_1	Kukri_c38850_1476	8.3
2B_1	Kukri_c5609_565	8.3
2B_1	Kukri_c673_452	8.3
2B_1	Kukri_rep_c100990_597	8.3
2B_1	Kukri_rep_c69962_1081	8.3
2B_1	RAC875_c20366_376	8.3
2B_1	RAC875_c87421_408	8.3
2B_1	RAC875_rep_c111100_447	8.3
2B_1	RAC875_s119681_325	8.3
2B_1	RFL_Contig3353_125	8.3
2B_1	tplb0038f13_1219	8.3
2B_1	tplb0046p14_388	8.3
2B_1	wsnp_BE488220B_Ta_1_1	8.3
2B_1	wsnp_CAP7_c193_107526	8.3
2B_1	wsnp_Ex_c10279_16851747	8.3
2B_1	wsnp_Ex_c14735_22823373	8.3
2B_1	wsnp_Ex_c1541_2943791	8.3
2B_1	wsnp_Ex_c1548_2961101	8.3
2B_1	wsnp_Ex_c16970_25563701	8.3
2B_1	wsnp_Ex_c20367_29431681	8.3
2B_1	wsnp_Ex_c21991_31162645	8.3
2B_1	wsnp_Ex_c22693_31898036	8.3
2B_1	wsnp_Ex_c2497_4666005	8.3
2B_1	wsnp_Ex_c26375_35620271	8.3
2B_1	wsnp_Ex_c2905_5358140	8.3
2B_1	wsnp_Ex_c3386_6217645	8.3
2B_1	wsnp_Ex_c37611_45330886	8.3
2B_1	wsnp_Ex_c37950_45589555	8.3
2B_1	wsnp_Ex_c3839_6981725	8.3
2B_1	wsnp_Ex_c40726_47723984	8.3
2B_1	wsnp_Ex_c42447_49025091	8.3
2B_1	wsnp_Ex_c4423_7960221	8.3
2B_1	wsnp_Ex_c482_957514	8.3
2B_1	wsnp_Ex_c52458_56049703	8.3
2B_1	wsnp_Ex_c6295_10967631	8.3
2B_1	wsnp_Ex_c7347_12594158	8.3
2B_1	wsnp_Ex_c7347_12594320	8.3
2B_1	wsnp_Ex_c7947_13490279	8.3
2B_1	wsnp_Ex_c9133_15198596	8.3
2B_1	wsnp_Ex_c9133_15199227	8.3
2B_1	wsnp_Ex_c9805_16183499	8.3
2B_1	wsnp_Ex_rep_c69465_68405569	8.3
2B_1	wsnp_JD_c2631_3548229	8.3
2B_1	wsnp_JD_c32007_24763860	8.3
2B_1	wsnp_Ku_c13756_21844262	8.3
2B_1	wsnp_Ku_c22272_32093892	8.3
2B_1	wsnp_Ku_c673_1393449	8.3
2B_1	wsnp_Ku_c691_1430065	8.3
2B_1	wsnp_Ra_c28444_37905400	8.3
2B_1	wsnp_Ra_c4746_8540731	8.3
2B_1	IAAV259	8.3
2B_1	RAC875_c20950_461	8.3
2B_1	wsnp_Ex_c3386_6217891	8.3
2B_1	wsnp_Ra_c4126_7552133	8.3
2B_1	wsnp_Ku_rep_c101330_88510141	8.3
2B_1	BS00072620_51	41.4
2B_1	Kukri_c10749_489	66.3
2B_1	wsnp_Ex_c1996_3754394	75.2
2B_1	Ra_c491_902	75.2
2B_1	Ra_c11464_294	75.2
2B_1	wsnp_Ra_rep_c106727_90434958	75.2
2B_1	RAC875_rep_c109471_154	75.2
2B_1	Ra_c2544_1566	75.2
2B_1	Tdurum_contig76118_145	75.7
2B_1	BobWhite_c930_401	83.9
2B_1	BobWhite_c25359_132	83.9
2B_1	BS00011952_51	83.9
2B_1	IAAV8991	83.9
2B_1	Tdurum_contig15440_616	83.9
2B_1	RAC875_c31756_83	83.9
2B_1	Kukri_c48570_102	83.9
2B_1	Kukri_c30668_294	83.9
2B_1	IAAV7308	83.9
2B_1	wsnp_Ra_c10712_17572884	83.9
2B_1	wsnp_Ex_c3740_6815132	83.9
2B_1	wsnp_Ex_c3685_6723631	83.9
2B_1	RAC875_c87052_193	83.9
2B_1	RAC875_c63883_76	83.9
2B_1	Kukri_c23961_636	83.9
2B_1	Excalibur_c14396_1629	83.9
2B_1	Excalibur_c22179_206	83.9
2B_1	RAC875_c9543_99	83.9
2B_1	Tdurum_contig93602_268	83.9
2B_1	Kukri_c41556_619	83.9
2B_1	Kukri_c16758_443	83.9
2B_1	IAAV8700	83.9
2B_1	Excalibur_c841_609	83.9
2B_1	BS00044806_51	83.9
2B_1	wsnp_Ex_c18354_27181431	83.9
2B_1	BS00043055_51	83.9
2B_1	BS00100466_51	83.9
2B_1	Kukri_c22513_1780	83.9
2B_1	Kukri_c12804_620	83.9
2B_1	Excalibur_c1787_1037	83.9
2B_1	BS00086109_51	83.9
2B_1	BS00085748_51	83.9
2B_1	Kukri_rep_c92967_369	83.9
2B_1	wsnp_Ex_c18354_27181086	83.9
2B_1	BS00110996_51	84.4
2B_1	Excalibur_c19499_948	84.4
2B_1	Tdurum_contig44328_68	84.4
2B_1	Tdurum_contig44328_448	84.4
2B_1	RAC875_c4331_1627	84.4
2B_1	Kukri_c56081_307	84.4
2B_1	Excalibur_c42928_135	84.4
2B_1	Excalibur_c30167_531	84.4
2B_1	Excalibur_c30167_243	84.4
2B_1	GENE-1711_923	85.9
2B_1	BS00072619_51	86.9
2B_1	BS00070051_51	86.9
2B_1	D_F5XZDLF01CFO7W_135	86.9
2B_1	BS00070900_51	87.4
2B_1	BS00010318_51	87.4
2B_1	wsnp_Ra_c4321_7860456	88.4
2B_1	wsnp_Ex_c19371_28311667	88.9
2B_1	Kukri_c63748_1453	88.9
2B_1	BS00099652_51	88.9
2B_1	BS00064706_51	88.9
2B_1	BS00045163_51	88.9
2B_1	BS00002660_51	88.9
2B_1	BS00011466_51	94.9
2B_1	RAC875_rep_c111225_330	94.9
2B_1	RAC875_c829_2014	94.9
2B_1	Tdurum_contig29563_257	97.4
2B_1	Tdurum_contig29563_183	97.4
2B_1	wsnp_Ra_rep_c117300_96881829	97.9
2B_1	Tdurum_contig54254_423	97.9
2B_1	TA001263-0453	97.9
2B_1	Excalibur_c40567_1893	97.9
2B_1	wsnp_Ex_c1792_3381384	98.4
2B_1	Excalibur_c5592_178	98.4
2B_1	Tdurum_contig28712_225	98.4
2B_1	IACX5750	98.4
2B_1	BS00003613_51	98.4
2B_1	Tdurum_contig71139_134	118
2B_1	BobWhite_c9376_153	123.2
2B_1	Tdurum_contig51706_1758	130.8
2B_1	Tdurum_contig51706_895	130.8
2B_1	Tdurum_contig51706_157	130.8
2B_1	Tdurum_contig33297_207	131.8
2B_1	Kukri_c26288_419	131.8
2B_1	wsnp_Ex_c4349_7841003	132.3
2B_1	Ex_c4349_594	132.3
2B_1	BobWhite_c30988_361	132.3
2B_1	Tdurum_contig54704_176	133.3
2B_1	Tdurum_contig5413_1011	133.8
2B_1	Tdurum_contig51443_336	133.8
2B_1	Tdurum_contig7495_799	133.8
2B_1	Tdurum_contig7495_1029	133.8
2B_1	Tdurum_contig4899_1075	133.8
2B_1	BobWhite_c41535_52	133.8
2B_1	Tdurum_contig27976_414	145.5
2B_1	BobWhite_c10578_272	145.5
2B_1	BobWhite_c31129_60	146
2B_1	Tdurum_contig48451_434	152.5
2B_1	wsnp_Ex_c66052_64232430	152.5
2B_1	Tdurum_contig48451_735	152.5
2B_1	Tdurum_contig74936_218	154
2B_1	Tdurum_contig74936_133	154
2B_1	Tdurum_contig54373_449	155
2B_1	Tdurum_contig54373_163	155
2B_1	Tdurum_contig54373_1003	155
2B_1	Kukri_c54975_287	155
2B_1	BobWhite_c27887_69	155.5
2B_1	RAC875_c41476_217	158.5
2B_1	Kukri_c36879_83	165.1
2B_1	Excalibur_c43482_196	165.1
2B_1	BobWhite_c30622_180	165.6
2B_1	Tdurum_contig62458_179	165.6
2B_1	Tdurum_contig60978_352	165.6
2B_1	RFL_Contig996_350	165.6
2B_1	Kukri_c83574_636	165.6
2B_1	Kukri_c83574_151	165.6
2B_1	IACX6223	165.6
2B_1	BS00067337_51	165.6
2B_1	RAC875_c37837_889	166.1
2B_1	Jagger_c36_213	166.1
2B_1	BS00023221_51	166.1
2B_1	BobWhite_c30112_275	166.6
2B_1	CAP7_c1018_75	166.6
2B_1	BobWhite_c5511_323	166.6
2B_1	Excalibur_c12135_100	166.6
2B_1	BobWhite_c40418_289	167.1
2B_1	RAC875_c76533_442	167.1
2B_1	RAC875_c3302_1411	167.1
2B_1	RAC875_c26415_350	167.1
2B_1	wsnp_JD_c12687_12877994	167.1
2B_1	wsnp_Ex_c5239_9272511	167.1
2B_1	tplb0045o20_699	167.1
2B_1	Tdurum_contig59780_988	167.1
2B_1	Tdurum_contig36804_98	167.1
2B_1	Tdurum_contig1653_190	167.1
2B_1	RAC875_c16009_223	167.1
2B_1	Kukri_c5904_80	167.1
2B_1	Kukri_c15043_326	167.1
2B_1	Excalibur_c64276_565	167.1
2B_1	Excalibur_c43482_141	167.1
2B_1	BS00043099_51	167.1
2B_1	BS00038218_51	167.1
2B_1	BS00038217_51	167.1
2B_1	BS00029713_51	167.1
2B_1	tplb0045o20_1168	167.1
2B_1	Tdurum_contig36804_220	167.1
2B_1	Excalibur_c6111_411	167.1
2B_1	D_GBUVHFX02IJCSL_51	167.1
2B_1	wsnp_Ex_c741_1456698	167.1
2B_1	Excalibur_c29769_81	167.1
2B_1	Tdurum_contig62852_369	167.6
2B_1	Tdurum_contig62852_538	167.6
2B_1	wsnp_Ex_rep_c67391_65971023	167.6
2B_1	Tdurum_contig81323_291	167.6
2B_1	BS00103461_51	167.6
2B_1	BS00079213_51	167.6
2B_1	Tdurum_contig68806_537	168.1
2B_1	Tdurum_contig62852_592	168.1
2B_1	Tdurum_contig62852_302	168.1
2B_1	Excalibur_c25430_183	168.1
2B_1	Tdurum_contig7800_228	169.6
2B_1	BS00071690_51	169.6
2B_1	Tdurum_contig82821_324	170.1
2B_1	Tdurum_contig81917_141	170.1
2B_1	Tdurum_contig32621_437	170.1
2B_1	Kukri_c67276_103	170.1
2B_1	Kukri_c4790_923	170.1
2B_1	Kukri_c4790_154	170.1
2B_1	BS00110442_51	170.1
2B_1	BS00110319_51	170.1
2B_1	Kukri_rep_c85389_715	171.1
2B_1	BobWhite_s65298_124	171.1
2B_1	wsnp_Ex_c12671_20140295	178.7
2B_1	BobWhite_c26775_217	178.7
2B_1	Ku_c34010_1016	191.4
2B_1	BS00040251_51	191.9
2B_1	Kukri_c36783_91	191.9
2B_1	Tdurum_contig76426_861	192.5
2B_1	Kukri_c15359_254	192.5
2B_1	GENE-1147_486	193
2B_1	wsnp_Ex_c45094_50985067	193.5
2B_1	Kukri_c22200_1171	193.5
2B_1	wsnp_Ex_c9248_15372536	193.5
2B_1	wsnp_Ex_c14595_22634031	193.5
2B_1	wsnp_BE399688B_Ta_2_1	193.5
2B_1	RAC875_c1226_652	193.5
2B_1	Ra_c4397_542	193.5
2B_1	IACX1412	193.5
2B_1	GENE-1389_59	193.5
2B_1	Excalibur_rep_c106124_239	193.5
2B_1	BS00092273_51	193.5
2B_1	Ex_c16854_1307	194
2B_1	BS00073426_51	194
2B_1	BS00040959_51	195
2B_1	BS00070091_51	195
2B_1	BS00035894_51	195
2B_1	wsnp_BE404601B_Ta_2_1	195
2B_1	IAAV1903	202.6
2B_1	BobWhite_c7786_376	202.6
2B_1	BobWhite_c5820_169	202.6
2B_1	wsnp_CAP7_c402_217331	204.1
2B_1	BobWhite_c948_52	204.1
2B_1	TA001322-1176	205.1
2B_1	wsnp_JD_c6350_7517130	205.6
2B_1	wsnp_Ex_rep_c101906_87187119	205.6
2B_1	wsnp_Ex_c33246_41764093	205.6
2B_1	Kukri_rep_c94009_116	205.6
2B_1	Kukri_c10054_567	205.6
2B_1	BS00091007_51	205.6
2B_1	BS00043103_51	205.6
2B_1	Excalibur_c44495_105	206.1
2B_1	Kukri_c39230_362	206.6
2B_1	RAC875_c97988_87	206.6
2B_1	wsnp_Ex_c1459_2797709	206.6
2B_1	wsnp_Ku_c27759_37702654	206.6
2B_1	Ku_c4777_2494	206.6
2B_1	wsnp_Ex_c9935_16358536	207.6
2B_1	wsnp_Ex_c2557_4761174	207.6
2B_1	BS00034315_51	207.6
2B_1	wsnp_Ku_c18923_28319203	207.6
2B_1	IACX6743	208.1
2B_1	wsnp_Ku_c2725_5163091	208.1
2B_1	wsnp_Ex_rep_c102216_87433489	208.1
2B_1	wsnp_Ex_c29108_38173309	208.1
2B_1	RAC875_c46023_492	208.1
2B_1	Excalibur_rep_c107558_367	208.1
2B_1	Excalibur_c41397_439	208.1
2B_1	Ex_c8832_2521	208.1
2B_1	wsnp_Ex_c38739_46196393	208.6
2B_1	wsnp_CAP7_c2233_1085003	208.6
2B_1	wsnp_BF291736B_Ta_1_1	208.6
2B_1	Kukri_rep_c74573_613	208.6
2B_1	IAAV1296	208.6
2B_1	RAC875_c17331_129	210.6
2B_1	CAP7_c7349_21	210.6
2B_1	wsnp_CAP11_c5474_2542512	210.6
2B_1	Excalibur_rep_c109282_92	210.6
2B_1	RAC875_c46735_674	210.6
2B_1	Excalibur_c90811_88	210.6
2B_1	BS00037345_51	210.6
2B_1	BS00007901_51	210.6
2B_1	TA002964-0938	210.6
2B_1	wsnp_Ex_rep_c67671_66332423	210.6
2B_1	wsnp_CAP8_rep_c4147_2032009	210.6
2B_1	wsnp_CAP7_rep_c7349_3284058	210.6
2B_1	wsnp_CAP11_c5474_2542616	210.6
2B_1	wsnp_CAP11_c5240_2436441	210.6
2B_1	wsnp_BE445278B_Ta_2_1	210.6
2B_1	RAC875_c5080_915	210.6
2B_1	RAC875_c46661_184	210.6
2B_1	Ra_c23048_474	210.6
2B_1	Ku_c6546_718	210.6
2B_1	Excalibur_c15696_1280	210.6
2B_1	BS00065558_51	210.6
2B_1	CAP8_c3982_23	210.6
2B_1	RFL_Contig5290_1493	210.6
2B_1	RAC875_c8045_231	210.6
2B_1	RAC875_c65101_756	210.6
2B_1	BobWhite_c8113_532	212.2
2B_1	wsnp_Ex_c7003_12065642	212.2
2B_1	wsnp_Ex_c15089_23270614	214.7
2B_1	Ra_c6700_406	214.7
2B_1	Kukri_c66550_167	214.7
2B_1	Tdurum_contig50509_805	214.7
2B_1	Kukri_rep_c68124_672	214.7
2B_1	Kukri_rep_c68124_169	214.7
2B_1	GENE-1313_319	214.7
2B_1	BS00034245_51	214.7
2B_1	Tdurum_contig8048_84	214.7
2B_1	wsnp_RFL_Contig1418_565105	214.7
2B_1	wsnp_Ex_c22423_31615798	214.7
2B_1	Excalibur_c18417_285	215.6
2B_1	RAC875_rep_c109975_192	215.6
2B_1	RAC875_c30936_318	215.6
2B_1	Kukri_c5711_112	215.6
2B_1	CAP7_c3814_303	215.6
2B_1	CAP11_c2947_204	215.6
2B_1	BS00066546_51	215.6
2B_1	BobWhite_c5852_103	215.6
2B_1	wsnp_Ex_c28287_37424983	215.6
2B_1	Tdurum_contig52063_1077	215.6
2B_1	Kukri_c6830_572	215.6
2B_1	Excalibur_c58566_284	215.6
2B_1	Tdurum_contig20589_247	216.1
2B_1	RAC875_c63112_460	216.1
2B_1	BS00061269_51	216.1
2B_1	BobWhite_rep_c61602_139	216.1
2B_1	Excalibur_c3776_2025	221.2
2B_1	TA002306-1975	221.2
2B_1	BS00072379_51	221.2
2B_1	Kukri_c3096_1411	221.7
2B_1	wsnp_Ex_c4218_7618252	222.7
2B_1	wsnp_be499362B_Td_2_1	234.6
2B_1	Tdurum_contig61682_187	234.6
2B_1	Tdurum_contig13223_701	234.6
2B_1	Tdurum_contig11172_443	234.6
2B_1	CAP8_c6219_239	234.6
2B_1	Tdurum_contig10084_316	238.1
2B_1	BobWhite_c43708_93	239.6
2B_1	Tdurum_contig42504_1634	244.6
2B_1	wsnp_Ex_c17700_26446810	248.1
2B_1	Kukri_c25281_99	248.1
2B_1	wsnp_Ex_c25217_34481787	248.6
2B_1	wsnp_Ku_rep_c68888_68067293	249.1
2B_1	RAC875_c30053_167	249.1
2B_1	Ra_c1799_1067	249.1
2B_1	Excalibur_rep_c106939_325	249.1
2B_1	wsnp_Ku_c4004_7311479	249.1
2B_1	Ra_c32699_410	249.1
2B_1	Ra_c1799_1066	249.1
2B_1	wsnp_JD_c14405_14144807	249.1
2B_1	Kukri_c53402_251	249.1
2B_1	Ku_c68762_669	249.1
2B_1	CAP11_c1476_128	249.1
2B_1	Tdurum_contig14688_78	249.6
2B_1	Excalibur_c42364_134	249.6
2B_1	Tdurum_contig92604_368	253
2B_1	Excalibur_c84741_99	253
2B_1	wsnp_Ex_c13908_21774935	260.6
2B_1	Kukri_c25868_56	260.6
2B_1	Excalibur_c37715_242	260.6
2B_1	Tdurum_contig25629_415	260.6
2B_1	RFL_Contig1445_1192	260.6
2B_1	CAP8_rep_c6671_353	260.6
2B_1	wsnp_Ex_rep_c67543_66165372	266.1
2B_1	Kukri_c19751_873	266.1
2B_1	Tdurum_contig30930_184	266.1
2B_1	wsnp_Ex_c10838_17631243	266.6
2B_1	IAAV5226	266.6
2B_1	wsnp_Ex_c55735_58127324	268.6
2B_1	Ra_c72477_2165	268.6
2B_1	Kukri_rep_c112675_676	268.6
2B_1	wsnp_Ex_c26281_35525999	268.6
2B_1	wsnp_Ex_c26281_35525243	268.6
2B_1	wsnp_Ex_c10251_16815404	268.6
2B_1	RAC875_c9932_705	268.6
2B_1	RAC875_c31162_706	268.6
2B_1	Ra_c6367_387	268.6
2B_1	Kukri_rep_c70870_919	268.6
2B_1	Ku_c11652_1720	268.6
2B_1	GENE-0872_133	268.6
2B_1	Kukri_rep_c80379_398	268.6
2B_1	wsnp_Ex_c17127_25756019	269.1
2B_1	wsnp_Ex_c10251_16815792	269.1
2B_1	TA006211-0075	269.1
2B_1	RAC875_c93461_87	269.1
2B_1	Excalibur_c43037_831	269.1
2B_1	Ex_c55735_1012	269.1
2B_1	Kukri_c8609_415	269.6
2B_1	Kukri_c31165_835	269.6
2B_1	CAP12_c2472_60	271.6
2B_1	wsnp_Ku_c12037_19549078	271.6
2B_1	Ku_c12037_482	271.6
2B_1	Excalibur_c52972_213	272.1
2B_1	RAC875_c25035_958	272.1
2B_1	Ra_c14316_850	272.1
2B_1	GENE-1352_214	272.1
2B_1	Ex_c30517_1207	272.1
2B_1	Excalibur_c16532_499	272.1
2B_1	Tdurum_contig42095_2454	272.6
2B_1	Tdurum_contig31414_100	272.6
2B_1	RAC875_c7540_118	272.6
2B_1	Excalibur_c88037_341	272.6
2B_1	RAC875_c26278_459	272.6
2B_1	wsnp_JD_c47318_32176833	273.1
2B_1	wsnp_Ex_c46576_52042185	273.1
2B_1	Ex_c960_776	273.1
2B_1	Ex_c960_746	273.1
2B_1	Tdurum_contig66317_77	273.1
2B_1	Tdurum_contig65349_140	273.1
2B_1	JG_c2092_196	273.1
2B_1	Ku_c10415_662	274.1
2B_1	BS00084130_51	274.1
2B_1	Ku_c6970_2174	274.1
2B_1	Tdurum_contig7144_602	274.1
2B_1	Tdurum_contig7144_248	274.1
2B_1	BS00070861_51	274.1
2B_1	BS00012071_51	274.1
2B_1	Kukri_c693_87	274.6
2B_1	Tdurum_contig12459_664	282.1
2B_1	Tdurum_contig35408_205	282.1
2B_1	Tdurum_contig23247_66	282.1
2B_1	Tdurum_contig12459_491	282.1
2B_1	Tdurum_contig12459_405	282.1
2B_1	Tdurum_contig10380_87	282.1
2B_1	Kukri_c65315_82	282.1
2B_1	GENE-1080_39	282.6
2B_1	Excalibur_c369_842	282.6
2B_1	BS00057475_51	282.6
2B_1	Tdurum_contig60773_387	283.1
2B_1	Excalibur_rep_c108225_302	285.1
2B_1	BS00098739_51	285.1
2B_1	RAC875_rep_c91134_949	285.1
2B_1	wsnp_Ex_c9628_15927045	285.1
2B_1	wsnp_Ex_c4542_8154800	285.1
2B_1	wsnp_Ex_c32493_41138957	285.1
2B_1	wsnp_Ex_c10796_17575074	285.1
2B_1	Tdurum_contig68666_570	285.1
2B_1	Tdurum_contig10237_356	285.1
2B_1	TA001281-1436	285.1
2B_1	RAC875_c3947_441	285.1
2B_1	Kukri_rep_c112754_101	285.1
2B_1	Kukri_c3024_1268	285.1
2B_1	IAAV677	285.1
2B_1	GENE-1444_220	285.1
2B_1	GENE-1444_162	285.1
2B_1	BS00079013_51	285.1
2B_1	BobWhite_c12134_1140	285.1
2B_1	Ra_c10607_524	285.1
2B_1	wsnp_Ex_c58274_59639258	285.6
2B_1	wsnp_Ex_c18503_27349536	285.6
2B_1	Tdurum_contig76090_916	285.6
2B_1	Tdurum_contig5691_596	285.6
2B_1	Tdurum_contig5691_526	285.6
2B_1	RFL_Contig5073_1003	285.6
2B_1	Excalibur_c34829_128	285.6
2B_1	RAC875_rep_c75375_484	285.6
2B_1	RAC875_c29294_1281	285.6
2B_1	BS00094373_51	285.6
2B_1	Tdurum_contig62800_207	285.6
2B_1	TA004957-0405	285.6
2B_1	wsnp_Ex_c58274_59638884	285.6
2B_1	wsnp_Ex_c58274_59638635	285.6
2B_1	tplb0049b10_696	285.6
2B_1	Tdurum_contig70510_462	285.6
2B_1	Tdurum_contig59522_420	285.6
2B_1	Tdurum_contig59522_262	285.6
2B_1	RAC875_c2697_551	285.6
2B_1	RAC875_c14039_299	285.6
2B_1	Kukri_c32241_1165	285.6
2B_1	Excalibur_c6769_1371	285.6
2B_1	Excalibur_c105074_365	285.6
2B_1	Excalibur_c105074_293	285.6
2B_1	CAP7_c1933_170	285.6
2B_1	BS00022518_51	285.6
2B_1	BobWhite_c5543_492	285.6
2B_1	BobWhite_c22106_204	285.6
2B_1	Tdurum_contig18858_324	286.6
2B_1	Excalibur_c64983_65	286.6
2B_1	BS00046166_51	286.6
2B_1	BobWhite_c47573_560	286.6
2B_1	wsnp_CAP12_c197_110707	287.1
2B_1	CAP11_c1036_238	287.1
2B_1	wsnp_Ra_c31353_40494768	287.1
2B_1	Ra_c31353_172	287.1
2B_1	Kukri_c18459_2622	287.1
2B_1	BS00080967_51	287.1
2B_1	Excalibur_c1353_1364	289.1
2B_1	BobWhite_c1072_100	290.1
2B_1	Excalibur_c22637_235	290.6
2B_1	wsnp_Ra_rep_c74497_72390803	292.6
2B_1	tplb0021f14_1322	292.6
2B_1	Tdurum_contig11653_371	292.6
2B_1	Tdurum_contig63945_206	292.6
2B_1	RAC875_c28108_400	292.6
2B_1	Excalibur_rep_c77221_93	292.6
2B_1	BS00022335_51	292.6
2B_1	BobWhite_c18540_351	292.6
2B_1	IAAV5307	293.6
2B_1	RAC875_c23538_1517	294.1
2B_1	Tdurum_contig17626_210	294.1
2B_1	CAP8_rep_c6372_264	294.1
2B_1	CAP8_rep_c8162_101	294.1
2B_1	RAC875_rep_c85788_180	294.1
2B_1	tplb0048g05_866	294.1
2B_1	BS00105171_51	294.1
2B_1	BS00023124_51	294.1
2B_1	BS00081231_51	294.1
2B_1	BS00104667_51	294.1
2B_1	wsnp_CAP11_rep_c4111_1943544	294.1
2B_1	BobWhite_c908_64	294.1
2B_1	wsnp_Ex_c40976_47910144	294.1
2B_1	BS00010012_51	294.1
2B_1	BS00035276_51	294.1
2B_1	BS00064318_51	294.1
2B_1	BS00064322_51	294.1
2B_1	Ex_c47157_558	294.1
2B_1	Excalibur_c10634_156	294.1
2B_1	Excalibur_c26483_387	294.1
2B_1	JD_c2156_2040	294.1
2B_1	Tdurum_contig17626_268	294.1
2B_1	wsnp_Ex_c40976_47910672	294.1
2B_1	wsnp_Ex_c47157_52450090	294.1
2B_1	Kukri_c26311_891	294.1
2B_1	wsnp_Ex_rep_c105744_90067453	294.1
2B_1	wsnp_Ex_c5619_9884202	294.1
2B_1	BS00067094_51	294.1
2B_1	Excalibur_c5619_208	294.1
2B_1	BS00011096_51	294.1
2B_1	Excalibur_c39451_68	294.1
2B_1	wsnp_Ra_c10658_17500389	295.1
2B_1	IACX8096	298.7
2B_1	IAAV6424	298.7
2B_1	GENE-1012_680	299.2
2B_1	Kukri_c52356_96	299.2
2B_1	BS00066719_51	299.2
2B_1	Excalibur_rep_c111801_55	299.2
2B_1	Kukri_c31059_130	299.2
2B_1	RAC875_c76186_353	299.2
2B_1	wsnp_RFL_Contig2123_1397739	299.2
2B_1	RAC875_c58006_436	299.2
2B_1	TA005601-0686	299.2
2B_1	wsnp_JD_c6010_7167159	299.2
2B_1	Kukri_c31059_165	299.2
2B_1	BS00046164_51	299.7
2B_1	BS00046165_51	299.7
2B_1	Excalibur_c36280_764	299.7
2B_1	IAAV2917	299.7
2B_1	BS00068310_51	305.8
2B_1	Tdurum_contig11711_293	306.8
2B_1	Tdurum_contig72054_94	306.8
2B_1	BS00047073_51	306.8
2B_1	Kukri_c36266_120	306.8
2B_1	Tdurum_contig11711_384	306.8
2B_1	Tdurum_contig12879_1273	306.8
2B_1	wsnp_Ex_c24135_33382700	306.8
2B_1	BobWhite_c1472_59	306.8
2B_1	BobWhite_c29596_649	306.8
2B_1	BobWhite_c32938_264	306.8
2B_1	BobWhite_c32938_366	306.8
2B_1	BS00009511_51	306.8
2B_1	BS00047070_51	306.8
2B_1	BS00064740_51	306.8
2B_1	GENE-0663_75	306.8
2B_1	Ku_c51309_212	306.8
2B_1	Kukri_c15498_657	306.8
2B_1	wsnp_Ex_c3506_6414757	306.8
2B_1	wsnp_Ex_c3506_6415495	306.8
2B_1	wsnp_Ex_c3506_6415581	306.8
2B_1	wsnp_Ku_c15498_24122936	306.8
2B_1	wsnp_Ku_c7297_12596001	306.8
2B_1	Kukri_c15498_1679	306.8
2B_1	JD_c9115_954	307.3
2B_1	Excalibur_c14988_872	307.3
2B_1	Kukri_c15555_587	309.4
2B_1	Excalibur_c2484_2113	309.4
2B_1	BS00036456_51	310.9
2B_1	Kukri_c51540_490	310.9
2B_1	Tdurum_contig54784_485	310.9
2B_1	Tdurum_contig64795_432	310.9
2B_1	Tdurum_contig12761_125	313.4
2B_1	Tdurum_contig12761_230	313.4
2B_1	Excalibur_c33221_681	328.4
2B_1	tplb0024e19_1029	328.4
2B_1	Tdurum_contig67254_504	328.4
2B_1	Tdurum_contig28980_211	330.4
2B_1	Excalibur_c18165_395	330.9
2B_1	BobWhite_c13295_407	330.9
2B_1	BobWhite_c10539_201	330.9
2B_1	BS00022374_51	337
2B_1	RAC875_c35399_497	340
2B_1	Tdurum_contig15649_215	340
2B_1	BS00009060_51	340
2B_1	Excalibur_c10637_515	340
2B_1	BS00043338_51	340
2B_1	BS00100981_51	340
2B_1	Excalibur_c91034_141	340
2B_1	Jagger_c914_155	340
2B_1	BS00028063_51	355.6
2B_1	BobWhite_c31708_99	356.1
2B_1	RAC875_c21358_62	378.4
2B_1	Tdurum_contig27996_171	378.4
2B_1	Tdurum_contig12159_468	378.4
2B_1	Tdurum_contig12556_686	378.4
2B_2	Excalibur_c49875_479	0
2B_2	Excalibur_c20417_743	7.2
2B_2	BS00012463_51	21
2B_2	BS00054751_51	21.6
2B_2	BobWhite_c13752_400	21.6
2B_2	RFL_Contig2324_884	21.6
2B_2	BS00083320_51	21.6
2B_2	Kukri_rep_c110277_268	22.1
2B_2	IAAV2607	22.1
2B_2	RAC875_c5082_841	22.7
2B_2	RFL_Contig2324_729	22.7
2B_2	IACX7581	24.1
2B_2	Kukri_c43821_342	24.1
3A_1	wsnp_JD_c5170_6293946	0
3A_1	Tdurum_contig83209_316	1
3A_1	GENE-3869_603	3.1
3A_1	Tdurum_contig11192_130	7.7
3A_1	Tdurum_contig11192_139	7.7
3A_1	Excalibur_c10014_307	9.2
3A_1	BS00110822_51	20.5
3A_1	CAP11_c570_97	20.5
3A_1	Excalibur_c85173_190	49.5
3A_1	RAC875_c8830_406	72.1
3A_2	Kukri_c96747_274	0
3A_2	Ra_c9347_163	0
3A_2	Ra_c6118_350	1.5
3A_2	Ra_c6118_450	1.5
3A_2	wsnp_Ku_c7060_12212702	2
3A_2	IACX2831	5
3A_2	wsnp_CAP11_rep_c4157_1965583	5
3A_2	JD_c16328_271	5.5
3A_2	Tdurum_contig75764_1038	10
3A_2	Tdurum_contig75764_146	10
3A_2	Excalibur_c4548_2505	10.5
3A_2	Excalibur_c4548_2697	10.5
3A_2	wsnp_Ex_c4548_8166555	10.5
3A_2	wsnp_Ra_c9738_16173810	10.5
3A_2	wsnp_Ra_c9738_16174002	10.5
3A_2	IAAV1328	10.5
3A_2	Excalibur_c47078_512	42.4
3A_2	Kukri_c4568_1708	42.4
3A_2	wsnp_Ex_c15674_24004513	42.4
3A_2	wsnp_Ex_c15674_24004810	42.4
3A_2	wsnp_Ex_c15674_24005648	42.4
3A_2	wsnp_Ku_c4568_8243775	42.4
3A_2	BobWhite_c11997_246	57.2
3A_2	Excalibur_c1806_1285	57.2
3A_2	Tdurum_contig59358_392	57.2
3A_2	RAC875_c64107_404	57.2
3A_2	Tdurum_contig74920_757	57.2
3A_2	RAC875_rep_c109701_76	57.2
3A_2	Excalibur_c11594_497	57.2
3A_2	RAC875_c584_303	57.2
3A_2	Tdurum_contig12371_132	57.2
3A_2	Tdurum_contig12371_197	57.2
3A_2	Tdurum_contig29847_479	57.2
3A_2	Tdurum_contig45380_92	57.2
3A_2	Tdurum_contig5961_2764	57.2
3A_2	Tdurum_contig12430_156	81.5
3A_2	Tdurum_contig55335_316	81.5
3A_2	Tdurum_contig15529_135	93.7
3A_3	Ra_c3287_1629	0
3A_3	Tdurum_contig28714_411	0
3A_3	JD_c48734_1188	0
3A_3	Ra_c3287_1461	0
3A_3	Tdurum_contig28714_240	0
3A_3	GENE-3665_61	3.5
3A_3	Tdurum_contig34075_98	3.5
3A_3	Tdurum_contig55841_351	3.5
3A_3	Ku_c4231_940	4.5
3A_3	RAC875_c18195_741	4.5
3A_3	CAP7_c9218_89	4.5
3A_3	Ra_c4373_453	4.5
3A_3	Tdurum_contig28518_122	15
3A_3	wsnp_BE426418A_Ta_2_1	15
3A_3	wsnp_BE426418A_Ta_2_2	15
3A_3	Kukri_c37078_523	18.5
3A_3	BobWhite_c35093_176	39.5
3A_3	BS00086050_51	39.5
3A_3	BS00086051_51	39.5
3A_3	TA003550-0145	39.5
3A_3	Tdurum_contig13011_381	39.5
3A_3	Tdurum_contig13011_451	39.5
3A_3	Tdurum_contig93570_848	39.5
3A_3	BS00106008_51	40
3A_3	Excalibur_c7610_143	40
3A_3	Tdurum_contig31235_99	40
3A_3	Tdurum_contig50577_620	40
3A_3	BS00029361_51	41.5
3A_3	Tdurum_contig28613_92	41.5
3A_3	Tdurum_contig5009_349	41.5
3A_3	Tdurum_contig5009_392	41.5
3A_3	Tdurum_contig5009_735	41.5
3A_3	Tdurum_contig62283_334	41.5
3A_3	Tdurum_contig67686_1204	41.5
3A_3	Tdurum_contig67686_792	41.5
3A_3	Tdurum_contig67686_851	41.5
3A_3	Tdurum_contig10458_460	41.5
3A_3	Tdurum_contig67686_874	41.5
3A_3	Tdurum_contig67686_1149	42
3A_3	Tdurum_contig67686_271	42
3A_3	wsnp_Ex_c11229_18163892	46.5
3A_3	wsnp_Ex_c28679_37784735	46.5
3A_3	wsnp_Ku_c5359_9531713	46.5
3A_3	wsnp_Ex_c60462_60905848	47
3A_3	Tdurum_contig75336_518	47.5
3B_1	BobWhite_c7975_613	0
3B_1	RAC875_c43871_478	0
3B_1	BS00042999_51	0
3B_1	CAP12_rep_c3868_270	0
3B_1	Excalibur_c6782_253	0
3B_1	RAC875_c51781_771	0
3B_1	Tdurum_contig50326_645	0
3B_1	BS00001400_51	0
3B_1	RAC875_rep_c111781_179	0
3B_1	RAC875_c43871_898	0
3B_1	CAP12_c3789_390	0
3B_1	GENE-1743_853	0
3B_1	Tdurum_contig7623_695	1
3B_1	BS00075934_51	1
3B_1	Kukri_c17082_519	1
3B_1	RAC875_c13385_1268	1
3B_1	Tdurum_contig44344_346	1
3B_1	Tdurum_contig7623_392	1
3B_1	BobWhite_c5611_281	1.5
3B_1	BobWhite_c6016_805	1.5
3B_1	BS00098760_51	1.5
3B_1	Excalibur_c11601_231	1.5
3B_1	Excalibur_c18826_1356	1.5
3B_1	Excalibur_c18826_452	1.5
3B_1	Excalibur_c39985_68	1.5
3B_1	Excalibur_c57482_242	1.5
3B_1	Excalibur_rep_c72054_314	1.5
3B_1	IAAV4876	1.5
3B_1	Kukri_c3540_931	1.5
3B_1	Kukri_c64588_274	1.5
3B_1	RAC875_c11409_550	1.5
3B_1	RAC875_c14803_873	1.5
3B_1	RAC875_c62483_112	1.5
3B_1	Tdurum_contig50954_1095	1.5
3B_1	Tdurum_contig50954_1264	1.5
3B_1	Tdurum_contig50954_1393	1.5
3B_1	Tdurum_contig50954_394	1.5
3B_1	Tdurum_contig50954_475	1.5
3B_1	Tdurum_contig50954_880	1.5
3B_1	Tdurum_contig77551_586	1.5
3B_1	tplb0028p23_691	1.5
3B_1	tplb0028p23_852	1.5
3B_1	wsnp_BE446462D_Ta_2_3	1.5
3B_1	Tdurum_contig77551_589	1.5
3B_1	Tdurum_contig47506_251	2.5
3B_1	Tdurum_contig47506_269	2.5
3B_1	Tdurum_contig47506_495	2.5
3B_1	BS00001335_51	3
3B_1	Kukri_c15654_309	3
3B_1	RFL_Contig3008_1370	3
3B_1	Tdurum_contig49804_392	3
3B_1	Tdurum_contig84762_189	3.5
3B_1	Tdurum_contig84762_258	3.5
3B_1	wsnp_Ku_c1629_3206989	4
3B_1	BS00098161_51	4
3B_1	Excalibur_rep_c71060_78	4
3B_1	RAC875_rep_c69171_241	4
3B_1	Tdurum_contig44159_245	4
3B_1	wsnp_Ex_c30368_39293223	4
3B_1	wsnp_Ra_c41135_48426638	4
3B_1	RAC875_rep_c69171_92	4
3B_1	Ra_c309_732	4
3B_1	Excalibur_c20277_483	7.1
3B_1	IAAV6644	7.1
3B_1	Jagger_c9935_144	7.1
3B_1	Tdurum_contig12008_803	7.1
3B_1	Tdurum_contig12899_342	7.1
3B_1	RFL_Contig5360_1282	7.1
3B_1	Tdurum_contig12008_725	7.1
3B_1	BS00058861_51	7.7
3B_1	Tdurum_contig11192_373	7.7
3B_1	wsnp_Ku_c12698_20441325	7.7
3B_1	Ex_c4578_544	7.7
3B_1	RAC875_c4954_943	8.7
3B_1	Kukri_c12401_2258	8.7
3B_1	RAC875_c14696_369	9.2
3B_1	BS00102648_51	9.2
3B_1	Kukri_c2972_110	9.2
3B_1	Kukri_rep_c88385_226	9.2
3B_1	RAC875_c14696_584	9.2
3B_1	RAC875_c14696_980	9.2
3B_1	RAC875_c16527_192	9.2
3B_1	Tdurum_contig9514_807	9.2
3B_1	Kukri_c11417_585	9.2
3B_1	BS00063445_51	13.9
3B_1	Excalibur_c17599_988	13.9
3B_1	BS00063443_51	13.9
3B_1	BS00011806_51	15.4
3B_1	BobWhite_c3902_175	15.9
3B_1	Ra_c17608_960	15.9
3B_1	Tdurum_contig32181_66	15.9
3B_1	Tdurum_contig61004_483	15.9
3B_1	Tdurum_contig94629_258	15.9
3B_1	IAAV8777	15.9
3B_1	wsnp_Ex_c40595_47620787	15.9
3B_1	tplb0059m03_1516	15.9
3B_1	Tdurum_contig8045_402	16.4
3B_1	BobWhite_c7454_492	16.9
3B_1	RFL_Contig5299_1529	16.9
3B_1	Tdurum_contig10608_1081	16.9
3B_1	Tdurum_contig10608_948	16.9
3B_1	Tdurum_contig14251_431	16.9
3B_1	BobWhite_c17021_269	17.4
3B_1	BS00098868_51	17.4
3B_1	wsnp_Ex_rep_c67625_66279491	17.4
3B_1	Tdurum_contig11988_459	18.1
[truncated: 3,347 more rows]
