# Supplementary material for: Mapping of Genetic Loci Conferring Resistance to Leaf Rust From Three Globally Resistant Durum Wheat Sources
Source: Front Plant Sci. 2019 Oct 8;10:1247. doi: 10.3389/fpls.2019.01247 (PMC6792298; doi:10.3389/fpls.2019.01247)
Supplement: Supplementary file 10 [file DataSheet_2.xlsx]

## Sheet: QLrusw1BL1
Annotated genes within the leaf rust resistance QTL interval of Qlr.usw-1BL.1 in Arnacoris
Chromosome	Start position	End position	Transcript ID	Annotation
chr1B	665828033	665830624	TRITD1Bv1G223040.1	Acyl-protein thioesterase 2
chr1B	665836214	665836561	TRITD1Bv1G223050.1	2-phospho-L-lactate transferase
chr1B	665836536	665836922	TRITD1Bv1G223050.2	NADH-quinone oxidoreductase subunit H
chr1B	665843306	665845831	TRITD1Bv1G223060.1	Retrovirus-related Pol polyprotein from transposon TNT 1-94
chr1B	665846276	665846635	TRITD1Bv1G223070.1	F-box protein
chr1B	665889176	665892093	TRITD1Bv1G223090.1	Tryptophan synthase alpha chain
chr1B	665925168	665925539	TRITD1Bv1G223110.1	Retrovirus-related Pol polyprotein from transposon TNT 1-94
chr1B	665937816	665938142	TRITD1Bv1G223120.1	NAD(P)-binding Rossmann-fold superfamily protein
chr1B	666033794	666034174	TRITD1Bv1G223130.1	Transposon Ty3-I Gag-Pol polyprotein
chr1B	666047722	666048189	TRITD1Bv1G223140.1	Retrovirus-related Pol polyprotein from transposon opus
chr1B	666056445	666056825	TRITD1Bv1G223150.1	S-adenosylmethionine decarboxylase proenzyme
chr1B	666071645	666072847	TRITD1Bv1G223160.1	F-box protein
chr1B	666076275	666087087	TRITD1Bv1G223170.5	Structural maintenance of chromosomes protein
chr1B	666093878	666094252	TRITD1Bv1G223180.1	Retrovirus-related Pol polyprotein from transposon TNT 1-94
chr1B	666205811	666207355	TRITD1Bv1G223220.1	F-box family protein
chr1B	666211267	666211635	TRITD1Bv1G223230.1	Delta-aminolevulinic acid dehydratase
chr1B	666257646	666257975	TRITD1Bv1G223240.1	Transposon Ty3-I Gag-Pol polyprotein
chr1B	666281296	666281730	TRITD1Bv1G223250.1	Retrovirus-related Pol polyprotein from transposon TNT 1-94
chr1B	666300788	666301261	TRITD1Bv1G223270.1	Myosin-2 heavy chain
chr1B	666300879	666301261	TRITD1Bv1G223270.2	2-C-methyl-D-erythritol 2,4-cyclodiphosphate synthase
chr1B	666301587	666303058	TRITD1Bv1G223280.1	Proteasome subunit beta type
chr1B	666318313	666318801	TRITD1Bv1G223290.1	transmembrane protein
chr1B	666325044	666325355	TRITD1Bv1G223300.1	Retrovirus-related Pol polyprotein from transposon TNT 1-94
chr1B	666332271	666332753	TRITD1Bv1G223320.1	Transcription elongation factor SPT5
chr1B	666333870	666337703	TRITD1Bv1G223330.1	Paired amphipathic helix protein Sin3
chr1B	666360079	666361440	TRITD1Bv1G223350.1	zinc ion binding/nucleic acid binding protein
chr1B	666382648	666384082	TRITD1Bv1G223360.1	ATP-dependent zinc metalloprotease FtsH
chr1B	666382990	666384091	TRITD1Bv1G223370.1	RNA helicase
chr1B	666391244	666392200	TRITD1Bv1G223380.1	Transposase
chr1B	666392296	666392775	TRITD1Bv1G223390.1	Transposon protein, putative, Mariner sub-class
chr1B	666400622	666404041	TRITD1Bv1G223400.3	dihydroflavonol 4-reductase/flavanone protein
chr1B	666408537	666408890	TRITD1Bv1G223410.1	Retrotransposon protein, putative, unclassified, expressed
chr1B	666463198	666466457	TRITD1Bv1G223450.1	transmembrane protein, putative (DUF247)
chr1B	666471840	666472262	TRITD1Bv1G223460.1	Transposon protein, putative, CACTA, En/Spm sub-class
chr1B	666481780	666486070	TRITD1Bv1G223470.1	transmembrane protein, putative (DUF247)
chr1B	666498786	666499115	TRITD1Bv1G223480.1	Retrotransposon protein, putative, unclassified
chr1B	666498945	666499463	TRITD1Bv1G223480.2	LINE-1 reverse transcriptase
chr1B	666506804	666510548	TRITD1Bv1G223490.1	ubiquitin E2 variant 1D-4
chr1B	666525758	666526282	TRITD1Bv1G223500.1	Retrotransposon protein, putative, Ty1-copia subclass
chr1B	666526174	666526497	TRITD1Bv1G223500.2	Retrovirus-related Pol polyprotein from transposon TNT 1-94
chr1B	666544960	666552606	TRITD1Bv1G223560.1	Glutamate 5-kinase
chr1B	666546156	666546803	TRITD1Bv1G223570.1	Auxin efflux carrier component
chr1B	666547450	666549132	TRITD1Bv1G223550.5	ATP-dependent zinc metalloprotease FtsH
chr1B	666548452	666552606	TRITD1Bv1G223560.3	Glutamate 5-kinase
chr1B	666550053	666550364	TRITD1Bv1G223580.1	Leucine-rich repeat protein kinase family protein
chr1B	666551824	666552362	TRITD1Bv1G223590.1	Flavin-dependent monooxygenase, reductase subunit HsaB
chr1B	666554361	666560586	TRITD1Bv1G223600.6	Lysine-specific demethylase
chr1B	666561684	666562079	TRITD1Bv1G223610.1	Spindle and kinetochore-associated protein 1
chr1B	666576548	666578611	TRITD1Bv1G223620.1	IQ calmodulin-binding motif family protein
chr1B	666582489	666587175	TRITD1Bv1G223630.1	E3 ubiquitin-protein ligase MARCH6
chr1B	666613209	666613457	TRITD1Bv1G223650.1	proline-, glutamic acid/leucine-rich protein
chr1B	666620305	666620661	TRITD1Bv1G223660.1	alanine aminotransferase 2
chr1B	666632028	666637242	TRITD1Bv1G223670.2	23S rRNA (uracil-C(5))-methyltransferase RlmCD
chr1B	666639438	666642186	TRITD1Bv1G223680.1	E3 ubiquitin-protein ligase MARCH6
chr1B	666641378	666642184	TRITD1Bv1G223680.2	RING/FYVE/PHD zinc finger superfamily protein
chr1B	666644725	666648501	TRITD1Bv1G223690.1	E3 ubiquitin-protein ligase MARCH6
chr1B	666681895	666682128	TRITD1Bv1G223700.1	Retrovirus-related Pol polyprotein from transposon TNT 1-94
chr1B	666689998	666692378	TRITD1Bv1G223710.1	RNase P Rpr2/Rpp21 subunit domain protein
chr1B	666694450	666699192	TRITD1Bv1G223720.4	E3 ubiquitin-protein ligase MARCH6
chr1B	666700180	666700689	TRITD1Bv1G223730.1	phosphate transporter 1;8
chr1B	666700892	666701344	TRITD1Bv1G223740.1	TPX2 (targeting protein for Xklp2) protein family
chr1B	666702560	666704159	TRITD1Bv1G223750.3	F-box family protein
chr1B	666712271	666712615	TRITD1Bv1G223760.1	Retrovirus-related Pol polyprotein from transposon TNT 1-94
chr1B	666741359	666741679	TRITD1Bv1G223770.1	Polynucleotidyl transferase, ribonuclease H-like superfamily protein
chr1B	666826306	666826950	TRITD1Bv1G223780.1	ATP synthase subunit alpha
chr1B	666888549	666893896	TRITD1Bv1G223790.1	E3 ubiquitin-protein ligase MARCH6
chr1B	666902850	666903248	TRITD1Bv1G223820.1	Calcium-transporting ATPase
chr1B	666903470	666903796	TRITD1Bv1G223830.1	O-antigen chain terminator bifunctional methyltransferase/kinase WbdD
chr1B	666920869	666921561	TRITD1Bv1G223840.1	Retrovirus-related Pol polyprotein from transposon TNT 1-94
chr1B	666928278	666928601	TRITD1Bv1G223850.1	Retrotransposon protein, putative, Ty1-copia subclass
chr1B	666984777	666989102	TRITD1Bv1G223860.1	Pentatricopeptide repeat-containing protein
chr1B	667018109	667018705	TRITD1Bv1G223870.1	Retrotransposon protein, putative, Ty3-gypsy subclass
chr1B	667050980	667051354	TRITD1Bv1G223880.1	Retrovirus-related Pol polyprotein from transposon TNT 1-94
chr1B	667139535	667143858	TRITD1Bv1G223940.1	Transducin/WD40 repeat-like superfamily protein
chr1B	667139984	667142968	TRITD1Bv1G223950.1	Leucine-rich repeat receptor-like protein kinase family protein
chr1B	667147209	667147406	TRITD1Bv1G223960.1	50S ribosomal protein L35Ae
chr1B	667171789	667172136	TRITD1Bv1G223970.1	Type II proteinase inhibitor family protein
chr1B	667178134	667179473	TRITD1Bv1G223980.2	Pathogen-related protein
chr1B	667181843	667182769	TRITD1Bv1G223990.1	Transposon protein, putative, Mutator sub-class
chr1B	667186378	667187233	TRITD1Bv1G224000.1	2-hydroxy-6-oxononadienedioate/2-hydroxy-6-oxononatrienedioate hydrolase
chr1B	667203165	667203986	TRITD1Bv1G224010.1	Polynucleotidyl transferase, ribonuclease H-like superfamily protein
chr1B	667208175	667212386	TRITD1Bv1G224020.3	Phosphoglucan phosphatase LSF1
chr1B	667226073	667226756	TRITD1Bv1G224030.1	Retrotransposon protein, putative, Ty3-gypsy subclass
chr1B	667233752	667234114	TRITD1Bv1G224040.1	Endonuclease/exonuclease/phosphatase family protein
chr1B	667234628	667235287	TRITD1Bv1G224050.1	Transposon TX1 uncharacterized
chr1B	667242561	667261491	TRITD1Bv1G224060.1	Disease resistance protein
chr1B	667284011	667289210	TRITD1Bv1G224070.1	NBS-LRR-like resistance protein
chr1B	667290648	667291978	TRITD1Bv1G224080.1	Protein FAR1-RELATED SEQUENCE 5
chr1B	667293639	667294839	TRITD1Bv1G224090.1	Ubiquitin-like-specific protease ESD4-like protein
chr1B	667294692	667295271	TRITD1Bv1G224090.2	Sentrin-specific protease 2
chr1B	667295259	667295662	TRITD1Bv1G224090.3	Ribose-5-phosphate isomerase A
chr1B	667295584	667296375	TRITD1Bv1G224090.4	UDP-3-O-acyl-N-acetylglucosamine deacetylase
chr1B	667340151	667340660	TRITD1Bv1G224100.1	Leucine-rich repeat receptor-like protein kinase
chr1B	667373733	667374170	TRITD1Bv1G224110.1	Retrovirus-related Pol polyprotein from transposon TNT 1-94
chr1B	667381242	667382471	TRITD1Bv1G224130.1	Pm3-like disease resistance protein
chr1B	667383242	667384660	TRITD1Bv1G224140.1	NBS-LRR-like resistance protein
chr1B	667415388	667457459	TRITD1Bv1G224150.1	Disease resistance protein
chr1B	667432113	667432802	TRITD1Bv1G224160.1	Retrovirus-related Pol polyprotein from transposon TNT 1-94
chr1B	667461712	667462284	TRITD1Bv1G224170.1	P-loop containing nucleoside triphosphate hydrolases superfamily protein
chr1B	667462641	667463375	TRITD1Bv1G224180.1	Heat shock 70 kDa protein 4L
chr1B	667466438	667467478	TRITD1Bv1G224190.1	Leucine-rich repeat receptor-like protein kinase
chr1B	667467267	667467725	TRITD1Bv1G224190.2	Leucine-rich repeat receptor-like protein kinase
chr1B	667496341	667496976	TRITD1Bv1G224200.1	Retrovirus-related Pol polyprotein from transposon TNT 1-94
chr1B	667521235	667523792	TRITD1Bv1G224230.2	RNA polymerase sigma factor
chr1B	667551198	667552046	TRITD1Bv1G224240.1	F-box protein
chr1B	667554318	667554665	TRITD1Bv1G224250.1	Polynucleotidyl transferase, ribonuclease H-like superfamily protein
chr1B	667561269	667561976	TRITD1Bv1G224260.1	Plant basic secretory family protein
chr1B	667581400	667582749	TRITD1Bv1G224270.1	Peroxisomal targeting signal 1 receptor
chr1B	667632337	667632867	TRITD1Bv1G224280.1	Retrotransposon protein, putative, Ty3-gypsy subclass
chr1B	667676136	667676612	TRITD1Bv1G224290.1	Transposon protein, putative, CACTA, En/Spm sub-class
chr1B	667684109	667686810	TRITD1Bv1G224300.3	F-box protein
chr1B	667734278	667736037	TRITD1Bv1G224310.1	F-box family protein
chr1B	667747790	667748344	TRITD1Bv1G224320.1	RNA-directed DNA polymerase (reverse transcriptase)-related family protein
chr1B	667748847	667753462	TRITD1Bv1G224330.1	Lectin receptor kinase
chr1B	667763839	667764291	TRITD1Bv1G224340.1	Retrotransposon protein, putative, Ty3-gypsy subclass
chr1B	667788658	667789347	TRITD1Bv1G224350.1	Retrovirus-related Pol polyprotein from transposon TNT 1-94
chr1B	667793319	667793708	TRITD1Bv1G224370.1	Transposable element protein, putative, Retrotrans_gag
chr1B	667809959	667812507	TRITD1Bv1G224380.1	Ubiquitin carboxyl-terminal hydrolase 2
chr1B	667910877	667911176	TRITD1Bv1G224390.1	Retrovirus-related Pol polyprotein from transposon TNT 1-94
chr1B	667928330	667928635	TRITD1Bv1G224400.1	Reverse transcriptase
chr1B	667929197	667929496	TRITD1Bv1G224410.1	Retrovirus-related Pol polyprotein from transposon TNT 1-94
chr1B	667949046	667949393	TRITD1Bv1G224420.1	BTB/POZ domain-containing protein
chr1B	667962586	667964919	TRITD1Bv1G224430.1	Ubiquitin carboxyl-terminal hydrolase 2
chr1B	667992239	667994366	TRITD1Bv1G224440.1	Methyltransferase
chr1B	667994789	667996748	TRITD1Bv1G224450.1	Trimethylguanosine synthase
chr1B	667995037	667996353	TRITD1Bv1G224450.2	Glutamate receptor ionotropic, NMDA 2A
chr1B	668000451	668004240	TRITD1Bv1G224460.1	Protein kinase family protein
chr1B	668007974	668008732	TRITD1Bv1G224470.1	Disease resistance protein (TIR-NBS-LRR class) family
chr1B	668035237	668035560	TRITD1Bv1G224480.1	Pol polyprotein
chr1B	668035613	668035954	TRITD1Bv1G224490.1	Transposon Ty3-I Gag-Pol polyprotein
chr1B	668043425	668043757	TRITD1Bv1G224500.1	Minichromosome maintenance (MCM2/3/5) family protein
chr1B	668065485	668067884	TRITD1Bv1G224510.1	Ubiquitin carboxyl-terminal hydrolase 2
chr1B	668068935	668069453	TRITD1Bv1G224520.1	BTB-POZ and MATH domain 2
chr1B	668074518	668074847	TRITD1Bv1G224530.1	DNA-directed RNA polymerase subunit beta
chr1B	668078089	668082079	TRITD1Bv1G224540.5	Ubiquitin carboxyl-terminal hydrolase-related protein
chr1B	668150410	668150799	TRITD1Bv1G224550.1	Orotidine 5'-phosphate decarboxylase
chr1B	668191525	668191854	TRITD1Bv1G224560.1	Retrotransposon protein, putative, Ty3-gypsy subclass
chr1B	668208256	668208978	TRITD1Bv1G224570.1	Dirigent protein
chr1B	668236873	668237460	TRITD1Bv1G224580.1	Transposon protein, putative, CACTA, En/Spm sub-class
chr1B	668250441	668251163	TRITD1Bv1G224590.1	Dirigent protein
chr1B	668278152	668278484	TRITD1Bv1G224600.1	Ubiquitin carboxyl-terminal hydrolase-related protein
chr1B	668291833	668292324	TRITD1Bv1G224610.1	Transposon protein, putative, CACTA, En/Spm sub-class
chr1B	668301785	668302328	TRITD1Bv1G224620.1	Dirigent protein
chr1B	668369713	668370057	TRITD1Bv1G224630.1	Transposon protein, putative, CACTA, En/Spm sub-class
chr1B	668523719	668524063	TRITD1Bv1G224640.1	Phenylalanine--tRNA ligase alpha subunit
chr1B	668561120	668562219	TRITD1Bv1G224650.1	telomere repeat binding factor 1
chr1B	668577713	668578255	TRITD1Bv1G224660.2	CST complex subunit TEN1-like protein
chr1B	668583275	668584743	TRITD1Bv1G224670.1	Metacaspase-1
chr1B	668591212	668602029	TRITD1Bv1G224680.2	Aminopeptidase
chr1B	668656317	668656772	TRITD1Bv1G224690.1	CST complex subunit TEN1-like protein
chr1B	668711199	668711504	TRITD1Bv1G224700.1	TCP-1/cpn60 chaperonin family protein
chr1B	668715476	668718259	TRITD1Bv1G224710.3	RNA binding protein
chr1B	668719639	668724792	TRITD1Bv1G224720.5	Receptor-like protein kinase
chr1B	668733665	668737838	TRITD1Bv1G224730.1	Kinase family protein
chr1B	668754855	668755508	TRITD1Bv1G224740.1	Retrovirus-related Pol polyprotein from transposon TNT 1-94
chr1B	668778777	668779109	TRITD1Bv1G224760.1	DNA-(apurinic or apyrimidinic site) lyase
chr1B	668783425	668783904	TRITD1Bv1G224770.1	Actin cross-linking protein
chr1B	668786198	668786542	TRITD1Bv1G224780.1	U-box domain-containing protein 52
chr1B	668793680	668794015	TRITD1Bv1G224790.1	Retrovirus-related Pol polyprotein from transposon TNT 1-94
chr1B	668809547	668810136	TRITD1Bv1G224800.1	GDSL esterase/lipase
chr1B	668873309	668874140	TRITD1Bv1G224810.1	nuclear factor Y, subunit B10
chr1B	668885286	668886503	TRITD1Bv1G224820.1	F-box family protein
chr1B	668920592	668923566	TRITD1Bv1G224830.3	Cytoplasmic membrane protein
chr1B	668925668	668927424	TRITD1Bv1G224840.1	Pentatricopeptide repeat-containing protein
chr1B	668929571	668932905	TRITD1Bv1G224850.1	Receptor-like protein kinase
chr1B	668976437	668976757	TRITD1Bv1G224860.1	Retrovirus-related Pol polyprotein from transposon TNT 1-94
chr1B	668983289	668983948	TRITD1Bv1G224870.1	Polynucleotidyl transferase, ribonuclease H-like superfamily protein
chr1B	668986510	668992284	TRITD1Bv1G224880.6	NBS-LRR disease resistance protein-like
chr1B	669067672	669068367	TRITD1Bv1G224890.1	Cysteine/Histidine-rich C1 domain family protein
chr1B	669069576	669070442	TRITD1Bv1G224900.1	TMPIT-like protein
chr1B	669081334	669082680	TRITD1Bv1G224920.1	Protein FAR1-RELATED SEQUENCE 5
chr1B	669086656	669088550	TRITD1Bv1G224930.1	Polyadenylate-binding protein, cytoplasmic and nuclear
chr1B	669091465	669092893	TRITD1Bv1G224940.1	Transposon protein, putative, CACTA, En/Spm sub-class, expressed
chr1B	669097053	669098484	TRITD1Bv1G224950.1	Laminin subunit beta-1
chr1B	669102210	669102824	TRITD1Bv1G224970.1	Tetratricopeptide repeat (TPR)-like superfamily protein
chr1B	669106220	669106987	TRITD1Bv1G224980.1	Aminotransferase-like, plant mobile domain-containing protein
chr1B	669107107	669107900	TRITD1Bv1G224990.1	DNA topoisomerase 3
chr1B	669107174	669112189	TRITD1Bv1G224990.2	MEI2-like protein 1
chr1B	669112173	669112938	TRITD1Bv1G224990.3	Sentrin-specific protease
chr1B	669172307	669174528	TRITD1Bv1G224910.2	disease resistance protein (TIR-NBS-LRR class)
chr1B	669221609	669222317	TRITD1Bv1G225000.1	Werner Syndrome-like exonuclease
chr1B	669238110	669250137	TRITD1Bv1G225010.1	Disease resistance protein (NBS-LRR class) family
chr1B	669241425	669242003	TRITD1Bv1G225020.1	Rhodopsin
chr1B	669251258	669251746	TRITD1Bv1G225030.1	Sulfate transporter CysZ
chr1B	669263097	669263471	TRITD1Bv1G225040.1	LINE-1 reverse transcriptase like
chr1B	669268842	669272329	TRITD1Bv1G225050.1	NBS-LRR disease resistance protein
chr1B	669302671	669303291	TRITD1Bv1G225060.1	Transposon Ty3-I Gag-Pol polyprotein
chr1B	669312685	669313167	TRITD1Bv1G225070.1	Retrovirus-related Pol polyprotein from transposon TNT 1-94
chr1B	669321611	669322087	TRITD1Bv1G225080.1	Transposable element protein, putative, Retrotrans_gag
chr1B	669322980	669323405	TRITD1Bv1G225090.1	Transposon Ty3-I Gag-Pol polyprotein
chr1B	669392194	669392652	TRITD1Bv1G225100.1	Transposon protein, putative, CACTA, En/Spm sub-class, expressed
chr1B	669395575	669395976	TRITD1Bv1G225120.1	NADH-ubiquinone oxidoreductase chain 5
chr1B	669420564	669426634	TRITD1Bv1G225130.1	Disease resistance protein (NBS-LRR class) family
chr1B	669439671	669439985	TRITD1Bv1G225140.1	DNA ligase
chr1B	669441358	669443906	TRITD1Bv1G225150.1	Mutator-like transposase
chr1B	669441358	669443906	TRITD1Bv1G225150.2	Transposon protein, putative, mutator sub-class
chr1B	669441358	669443906	TRITD1Bv1G225150.3	Mutator-like transposase
chr1B	669441358	669443906	TRITD1Bv1G225150.4	Transposon protein, putative, mutator sub-class
chr1B	669444159	669444863	TRITD1Bv1G225160.1	DNAJ heat shock N-terminal domain-containing protein
chr1B	669564631	669575084	TRITD1Bv1G225170.1	FAD-binding Berberine family protein
chr1B	669585066	669585290	TRITD1Bv1G225180.1	ferric reduction oxidase 7
chr1B	669605876	669606334	TRITD1Bv1G225190.1	disease resistance protein (TIR-NBS-LRR class)
chr1B	669605876	669606871	TRITD1Bv1G225190.2	disease resistance protein (TIR-NBS-LRR class)
chr1B	669619285	669619836	TRITD1Bv1G225200.1	Calmodulin, putative
chr1B	669635798	669636358	TRITD1Bv1G225210.1	Calcium-binding family protein
chr1B	669650161	669650721	TRITD1Bv1G225220.1	Calmodulin, putative
chr1B	669651375	669651701	TRITD1Bv1G225230.1	zinc finger FYVE domain protein
chr1B	669683933	669684625	TRITD1Bv1G225240.1	Calmodulin, putative
chr1B	669701273	669701599	TRITD1Bv1G225250.1	Retrovirus-related Pol polyprotein from transposon TNT 1-94
chr1B	669805177	669807329	TRITD1Bv1G225280.2	Sigma factor sigB regulation protein rsbQ
chr1B	669807056	669807313	TRITD1Bv1G225290.1	L-arabinose isomerase
chr1B	669824684	669825101	TRITD1Bv1G225300.1	ATPase E1-E2 type family protein / haloacid dehalogenase-like hydrolase family protein
chr1B	669834978	669835389	TRITD1Bv1G225310.1	Calcium-dependent lipid-binding (CaLB domain) plant phosphoribosyltransferase family protein
chr1B	669848486	669848818	TRITD1Bv1G225320.1	Myb family transcription factor family protein
chr1B	669883529	669883984	TRITD1Bv1G225330.1	Retrovirus-related Pol polyprotein from transposon TNT 1-94
chr1B	669906781	669907214	TRITD1Bv1G225340.1	Beige/BEACH and WD40 domain-containing protein
chr1B	669940130	669940570	TRITD1Bv1G225350.1	Translation initiation factor 1A
chr1B	669942646	669942990	TRITD1Bv1G225360.1	Aspartyl/glutamyl-tRNA(Asn/Gln) amidotransferase subunit B
chr1B	670059910	670060296	TRITD1Bv1G225370.1	Retrovirus-related Pol polyprotein from transposon TNT 1-94
chr1B	670102613	670104298	TRITD1Bv1G225380.2	Kinase family protein
chr1B	670112272	670113102	TRITD1Bv1G225390.1	Low affinity potassium transport system protein
chr1B	670129411	670129773	TRITD1Bv1G225400.1	Retrovirus-related Pol polyprotein from transposon TNT 1-94
chr1B	670254076	670255541	TRITD1Bv1G225440.1	DNA-directed RNA polymerase subunit beta
chr1B	670254076	670255541	TRITD1Bv1G225440.2	Ribosomal RNA large subunit methyltransferase E
chr1B	670255419	670256441	TRITD1Bv1G225450.1	Polycystic kidney disease and receptor for egg jelly-related protein
chr1B	670255668	670255865	TRITD1Bv1G225450.2	Septin-7
chr1B	670261564	670264684	TRITD1Bv1G225460.1	RING/U-box superfamily protein
chr1B	670265753	670266277	TRITD1Bv1G225470.1	Peroxidase superfamily protein
chr1B	670266027	670266731	TRITD1Bv1G225470.2	Na(+)/H(+) antiporter NhaA
chr1B	670266583	670266993	TRITD1Bv1G225470.3	V-type ATP synthase subunit C
chr1B	670269611	670270282	TRITD1Bv1G225480.1	Cytochrome C
chr1B	670275221	670275529	TRITD1Bv1G225490.1	Isoleucine--tRNA ligase
chr1B	670366701	670367150	TRITD1Bv1G225500.1	Retrovirus-related Pol polyprotein from transposon TNT 1-94
chr1B	670444667	670448417	TRITD1Bv1G225530.1	Cytokinin riboside 5'-monophosphate phosphoribohydrolase
chr1B	670452625	670452969	TRITD1Bv1G225540.1	F-box domain containing protein, expressed
chr1B	670453351	670453791	TRITD1Bv1G225550.1	F-box family protein
chr1B	670464497	670465408	TRITD1Bv1G225560.1	Transposable element protein, putative, Retrotrans_gag
chr1B	670466041	670466364	TRITD1Bv1G225570.1	Transposon Ty3-I Gag-Pol polyprotein
chr1B	670477755	670478438	TRITD1Bv1G225580.1	Retrovirus-related Pol polyprotein from transposon TNT 1-94
chr1B	670491377	670491691	TRITD1Bv1G225590.1	Reverse transcriptase
chr1B	670491678	670492538	TRITD1Bv1G225590.2	Retrovirus-related Pol polyprotein from transposon TNT 1-94
chr1B	670496144	670496515	TRITD1Bv1G225600.1	Nucleotide-diphospho-sugar transferases superfamily protein
chr1B	670513771	670514169	TRITD1Bv1G225610.1	Retrovirus-related Pol polyprotein from transposon TNT 1-94
chr1B	670522656	670522973	TRITD1Bv1G225630.1	Protein kinase family protein
chr1B	670600755	670604977	TRITD1Bv1G225640.1	Disease resistance protein (NBS-LRR class) family
chr1B	670621450	670683112	TRITD1Bv1G225620.12	NBS-LRR-like resistance protein
chr1B	670635684	670637612	TRITD1Bv1G225650.1	Retrovirus-related Pol polyprotein from transposon TNT 1-94
chr1B	670638699	670639801	TRITD1Bv1G225660.3	Gag-pol polyprotein
chr1B	670638944	670640182	TRITD1Bv1G225660.4	Retrovirus-related Pol polyprotein from transposon TNT 1-94
chr1B	670642073	670642645	TRITD1Bv1G225660.5	tRNA (guanine-N(1)-)-methyltransferase
chr1B	670645836	670646048	TRITD1Bv1G225670.1	Leucine Rich Repeat family protein, expressed
chr1B	670777814	670778986	TRITD1Bv1G225680.1	Retrovirus-related Pol polyprotein from transposon TNT 1-94
chr1B	670815850	670816809	TRITD1Bv1G225690.1	Heat shock family protein
chr1B	670821535	670822656	TRITD1Bv1G225700.1	Heat shock family protein
chr1B	670826214	670827545	TRITD1Bv1G225710.1	Transcription factor, putative
chr1B	670827633	670831321	TRITD1Bv1G225720.1	SHV3-like 1
chr1B	670832105	670835581	TRITD1Bv1G225730.2	ATP-dependent Clp protease proteolytic subunit
chr1B	670875860	670876168	TRITD1Bv1G225740.1	Bifunctional uridylyltransferase/uridylyl-removing enzyme
chr1B	670923916	670924719	TRITD1Bv1G225750.1	Retrovirus-related Pol polyprotein from transposon 17.6
chr1B	670934904	670935341	TRITD1Bv1G225760.1	Histone-lysine N-methyltransferase, H3 lysine-9 specific SUVH1
chr1B	670979707	670980036	TRITD1Bv1G225770.1	Retrotransposon protein, putative, Ty3-gypsy subclass
chr1B	671208516	671210548	TRITD1Bv1G225780.1	2-aminoethanethiol dioxygenase
chr1B	671225894	671226331	TRITD1Bv1G225790.1	Retrovirus-related Pol polyprotein from transposon TNT 1-94
chr1B	671362776	671363123	TRITD1Bv1G225820.1	Retrotransposon protein, putative, unclassified
chr1B	671488507	671488830	TRITD1Bv1G225830.1	Retrovirus-related Pol polyprotein from transposon TNT 1-94
chr1B	671506642	671506983	TRITD1Bv1G225840.1	Replication factor-A protein 1, amino-terminal domain protein
chr1B	671548627	671548953	TRITD1Bv1G225850.1	Retrovirus-related Pol polyprotein from transposon TNT 1-94
chr1B	671559238	671562076	TRITD1Bv1G225870.1	ARM repeat superfamily protein
chr1B	671562220	671562965	TRITD1Bv1G225880.1	Calcium-binding EF hand family protein
chr1B	671566601	671567149	TRITD1Bv1G225890.1	Protein arginine N-methyltransferase 7
chr1B	671572749	671581382	TRITD1Bv1G225900.1	Inositol 1,4,5-trisphosphate receptor type 3
chr1B	671574019	671574393	TRITD1Bv1G225910.1	ATP-dependent DNA helicase PIF1
chr1B	671575962	671577716	TRITD1Bv1G225920.1	AT hook motif-containing protein, putative
chr1B	671576355	671578277	TRITD1Bv1G225920.2	AT hook motif-containing protein, putative, expressed
chr1B	671576384	671576575	TRITD1Bv1G225920.3	2-oxoglutarate (2OG) and Fe(II)-dependent oxygenase superfamily protein
chr1B	671576646	671578238	TRITD1Bv1G225920.4	AT hook motif-containing protein, putative
chr1B	671577008	671578039	TRITD1Bv1G225920.5	myb domain protein 65
chr1B	671577299	671578634	TRITD1Bv1G225920.6	AT hook motif-containing protein, putative
chr1B	671578989	671579315	TRITD1Bv1G225920.11	alpha/beta-Hydrolases superfamily protein
chr1B	671582499	671582936	TRITD1Bv1G225930.1	TRAF-like superfamily protein
chr1B	671583917	671593184	TRITD1Bv1G225940.1	DNA damage-binding protein 1
chr1B	671592411	671593181	TRITD1Bv1G225950.1	SPBc2 prophage-derived DNA ligase-like protein LigB
chr1B	671595483	671596359	TRITD1Bv1G225960.1	ARM repeat superfamily protein
chr1B	671701247	671701621	TRITD1Bv1G225970.1	Retrovirus-related Pol polyprotein from transposon TNT 1-94
chr1B	671725277	671725846	TRITD1Bv1G225980.1	Transposon protein, putative, CACTA, En/Spm sub-class
chr1B	671779588	671780327	TRITD1Bv1G226000.1	DNA mismatch repair protein MutL
chr1B	671781803	671782218	TRITD1Bv1G226010.1	Rhomboid-like protein
chr1B	671789465	671789776	TRITD1Bv1G226020.1	Retrovirus-related Pol polyprotein from transposon TNT 1-94
chr1B	671798502	671810522	TRITD1Bv1G226030.1	transmembrane protein, putative (DUF247)
chr1B	671798502	671810522	TRITD1Bv1G226030.2	transmembrane protein, putative (DUF247)
chr1B	671945015	671945467	TRITD1Bv1G226040.1	Retrovirus-related Pol polyprotein from transposon TNT 1-94
chr1B	671972203	671972502	TRITD1Bv1G226070.1	Retrovirus-related Pol polyprotein from transposon opus
chr1B	671995344	671996597	TRITD1Bv1G226080.1	cleavage and polyadenylation specificity factor 73 kDa subunit-II
chr1B	672013549	672013848	TRITD1Bv1G226090.1	UvrABC system protein C
chr1B	672077785	672078114	TRITD1Bv1G226100.1	DNA-binding protein SATB1
chr1B	672086633	672087211	TRITD1Bv1G226110.1	Serine/threonine-protein phosphatase 2A 55 kDa regulatory subunit B
chr1B	672109482	672109814	TRITD1Bv1G226120.1	Transposable element protein, putative, Retrotrans_gag
chr1B	672182368	672183490	TRITD1Bv1G226130.1	E3 UFM1-protein ligase-like protein
chr1B	672202885	672203936	TRITD1Bv1G226140.1	Phosphate-specific transport system accessory protein PhoU homolog
chr1B	672239429	672240546	TRITD1Bv1G226150.2	5-methyltetrahydropteroyltriglutamate--homocysteine methyltransferase
chr1B	672245694	672246041	TRITD1Bv1G226160.1	UPF0738 protein BCE33L1094
chr1B	672246849	672247515	TRITD1Bv1G226170.1	Glutamate dehydrogenase
chr1B	672260677	672262639	TRITD1Bv1G226180.1	kinesin-like calmodulin-binding protein (ZWICHEL)
chr1B	672261064	672262733	TRITD1Bv1G226180.2	Pentatricopeptide repeat (PPR) superfamily protein
chr1B	672278027	672280939	TRITD1Bv1G226190.1	Serine hydroxymethyltransferase
chr1B	672306621	672307346	TRITD1Bv1G226200.1	Calcium-dependent protein kinase 3
chr1B	672306641	672306945	TRITD1Bv1G226200.2	Transducin/WD40 repeat-like superfamily protein
chr1B	672350184	672374621	TRITD1Bv1G226210.1	Translation initiation factor if-2, putative
chr1B	672351493	672352309	TRITD1Bv1G226220.1	Argonaute
chr1B	672371910	672372239	TRITD1Bv1G226230.1	S15/NS1, RNA-binding protein
chr1B	672379731	672380838	TRITD1Bv1G226240.1	Transposon Ty1-H Gag-Pol polyprotein
chr1B	672429625	672431038	TRITD1Bv1G226250.1	DNA-directed RNA polymerase subunit beta
chr1B	672487926	672488681	TRITD1Bv1G226260.1	serine acetyltransferase 2;2
chr1B	672499004	672499378	TRITD1Bv1G226270.1	Galactose oxidase/kelch repeat superfamily protein
chr1B	672530249	672530557	TRITD1Bv1G226280.1	26S protease regulatory subunit 4-like protein
chr1B	672532118	672532504	TRITD1Bv1G226290.1	Retrotransposon protein, putative, Ty3-gypsy subclass
chr1B	672555545	672555865	TRITD1Bv1G226300.1	Zinc finger CCCH domain-containing protein 8
chr1B	672557354	672558145	TRITD1Bv1G226310.1	Protein EFR3
chr1B	672557354	672558197	TRITD1Bv1G226310.2	Protein EFR3
chr1B	672567602	672569179	TRITD1Bv1G226320.1	Homeobox leucine zipper protein
chr1B	672589158	672590364	TRITD1Bv1G226330.1	Elongation factor 1-alpha
chr1B	672652235	672652574	TRITD1Bv1G226340.1	DNA-directed RNA polymerase subunit beta'
chr1B	672677756	672678163	TRITD1Bv1G226350.1	Retrovirus-related Pol polyprotein from transposon TNT 1-94
chr1B	672850178	672850537	TRITD1Bv1G226370.1	Translation initiation factor IF-2
chr1B	672905039	672905347	TRITD1Bv1G226380.1	Transposon protein, putative, CACTA, En/Spm sub-class
chr1B	672919306	672919623	TRITD1Bv1G226390.1	Retrotransposon protein, putative, unclassified
chr1B	672964559	672965047	TRITD1Bv1G226400.1	Retrotransposon protein, putative, Ty3-gypsy subclass
chr1B	672988108	672988467	TRITD1Bv1G226410.1	Mitochondrial transcription termination factor family protein
chr1B	673018116	673020974	TRITD1Bv1G226430.1	Protein PHOSPHATE STARVATION RESPONSE 1
chr1B	673018116	673023336	TRITD1Bv1G226430.2	P-loop nucleoside triphosphate hydrolases superfamily protein with CH (Calponin Homology) domain-containing protein
chr1B	673019300	673023336	TRITD1Bv1G226430.3	P-loop containing nucleoside triphosphate hydrolases superfamily protein
chr1B	673036322	673038511	TRITD1Bv1G226440.1	Glucose-1-phosphate adenylyltransferase

## Sheet: QLrusw1BL2
Annotated genes within the leaf rust resistance QTL interval of Qlr.usw-1BL.2 in Saragolla
Chromosome	Start position	End position	Transcript ID	Annotation
chr1B	659058292	659058621	TRITD1Bv1G219470.1	C3H4 type zinc finger protein (DUF23)
chr1B	659062231	659065515	TRITD1Bv1G219480.3	Glucose-1-phosphate adenylyltransferase
chr1B	659072769	659076540	TRITD1Bv1G219490.2	Rad3-related DNA helicase family protein
chr1B	659124544	659124855	TRITD1Bv1G219500.1	Retrovirus-related Pol polyprotein from transposon TNT 1-94
chr1B	659144977	659145984	TRITD1Bv1G219530.1	Transposon Ty3-G Gag-Pol polyprotein
chr1B	659275983	659277804	TRITD1Bv1G219540.1	NAD(P)-binding Rossmann-fold superfamily protein isoform 4
chr1B	659315394	659316315	TRITD1Bv1G219550.1	cyclic nucleotide gated channel 1
chr1B	659318864	659319175	TRITD1Bv1G219560.1	homolog of X-ray repair cross complementing 2 (XRCC2)
chr1B	659374280	659375089	TRITD1Bv1G219570.1	NAD(P)-binding Rossmann-fold superfamily protein isoform 4
chr1B	659387662	659388108	TRITD1Bv1G219580.1	LINE-1 reverse transcriptase like
chr1B	659388112	659388465	TRITD1Bv1G219590.1	Retrotransposon protein, putative, unclassified
chr1B	659391382	659391840	TRITD1Bv1G219600.1	heavy metal atpase 3
chr1B	659394463	659400775	TRITD1Bv1G219610.1	Sister chromatid cohesion 1 protein 1
chr1B	659403568	659418117	TRITD1Bv1G219620.1	High mobility group protein B2
chr1B	659418130	659418924	TRITD1Bv1G219630.1	Uracil-DNA glycosylase
chr1B	659455052	659455399	TRITD1Bv1G219640.1	Copia-like retroelement pol polyprotein
chr1B	659473926	659475176	TRITD1Bv1G219650.1	ATP-dependent DNA helicase PIF1
chr1B	659473926	659476052	TRITD1Bv1G219650.2	ATP-dependent DNA helicase pif1
chr1B	659474372	659476052	TRITD1Bv1G219650.3	DNA helicase
chr1B	659474415	659476103	TRITD1Bv1G219650.4	DNA helicase homolog, putative
chr1B	659475097	659475632	TRITD1Bv1G219650.5	DNA helicase homolog, putative
chr1B	659476532	659478885	TRITD1Bv1G219660.1	Helicase-like protein
chr1B	659476915	659478218	TRITD1Bv1G219660.2	Disease resistance protein (TIR-NBS-LRR class), putative
chr1B	659477958	659478218	TRITD1Bv1G219660.3	Pentatricopeptide repeat (PPR) superfamily protein
chr1B	659485047	659488348	TRITD1Bv1G219670.2	Phosphatidate cytidylyltransferase, mitochondrial
chr1B	659522131	659526689	TRITD1Bv1G219680.13	Kinase-related protein DUF1296
chr1B	659534388	659535341	TRITD1Bv1G219690.1	Retrovirus-related Pol polyprotein from transposon TNT 1-94
chr1B	659567326	659567727	TRITD1Bv1G219710.1	Retrotransposon protein, putative, Ty3-gypsy subclass
chr1B	659576466	659576810	TRITD1Bv1G219720.1	nuclear pore complex protein (DUF3414)
chr1B	659578286	659579188	TRITD1Bv1G219730.1	GPI-anchored adhesin-like protein, putative (DUF3741)
chr1B	659595958	659596347	TRITD1Bv1G219740.1	Cellulose-synthase-like C12
chr1B	659626318	659626617	TRITD1Bv1G219750.1	NH(3)-dependent NAD(+) synthetase
chr1B	659627324	659628216	TRITD1Bv1G219760.1	Chlorophyll a-b binding protein, chloroplastic
chr1B	659631033	659631431	TRITD1Bv1G219770.1	Retrotransposon protein, putative, unclassified
chr1B	659659178	659662333	TRITD1Bv1G219800.2	Chaperone protein DnaJ
chr1B	659681927	659683977	TRITD1Bv1G219810.2	receptor kinase 1
chr1B	659684132	659684596	TRITD1Bv1G219820.1	Retrotransposon protein, putative, LINE subclass
chr1B	659688175	659688997	TRITD1Bv1G219830.1	Receptor-like protein kinase
chr1B	659701979	659703152	TRITD1Bv1G219840.1	Glucan endo-1,3-beta-glucosidase 1
chr1B	659706947	659707411	TRITD1Bv1G219850.1	RNA-directed DNA polymerase (Reverse transcriptase)
chr1B	659742021	659742920	TRITD1Bv1G219860.1	Plant basic secretory protein family protein, putative
chr1B	659745715	659746122	TRITD1Bv1G219870.1	DNA (cytosine-5)-methyltransferase 1
chr1B	659747406	659752879	TRITD1Bv1G219880.2	CAS1 domain-containing protein 1
chr1B	659760747	659761226	TRITD1Bv1G219890.1	Transposon protein, putative, CACTA, En/Spm sub-class
chr1B	659775608	659776264	TRITD1Bv1G219900.1	Retrovirus-related Pol polyprotein from transposon TNT 1-94
chr1B	659791184	659791633	TRITD1Bv1G219910.1	RNA-directed DNA polymerase (reverse transcriptase)-related family protein
chr1B	659834690	659835109	TRITD1Bv1G219920.1	Retrovirus-related Pol polyprotein from transposon TNT 1-94
chr1B	659839577	659840479	TRITD1Bv1G219930.1	Myosin-2
chr1B	659854506	659854919	TRITD1Bv1G219940.1	Retrovirus-related Pol polyprotein from transposon TNT 1-94
chr1B	659855375	659855737	TRITD1Bv1G219960.1	Reverse transcriptase
chr1B	659855756	659856097	TRITD1Bv1G219970.1	Retrovirus-related Pol polyprotein from transposon TNT 1-94
chr1B	659870873	659874125	TRITD1Bv1G219990.2	Solanesyl diphosphate synthase family protein
chr1B	659878252	659883345	TRITD1Bv1G220000.2	Mitogen-activated protein kinase
chr1B	659897427	659897756	TRITD1Bv1G220010.1	DNA-directed RNA polymerase subunit
chr1B	659939476	659940852	TRITD1Bv1G220040.1	Carboxypeptidase
chr1B	659943970	659945041	TRITD1Bv1G220050.1	Chymotrypsin inhibitor
chr1B	659951989	659952917	TRITD1Bv1G220060.1	Subtilisin inhibitor 1
chr1B	659957459	659958673	TRITD1Bv1G220070.1	glycosyl hydrolase family 10 protein / carbohydrate-binding domain-containing protein
chr1B	659965456	659967196	TRITD1Bv1G220080.1	hAT transposon superfamily
chr1B	659965822	659973893	TRITD1Bv1G220080.2	HAT transposon superfamily
chr1B	659974582	659975034	TRITD1Bv1G220090.1	Disease resistance protein (CC-NBS-LRR class) family
chr1B	659988011	659988391	TRITD1Bv1G220100.1	Transposon protein, putative, CACTA, En/Spm sub-class
chr1B	660019409	660019732	TRITD1Bv1G220110.1	Lysine histidine transporter 1
chr1B	660024154	660025001	TRITD1Bv1G220120.1	Translation initiation factor IF-2
chr1B	660024347	660024779	TRITD1Bv1G220120.2	Dynamin-1
chr1B	660026875	660028122	TRITD1Bv1G220130.1	Inhibitor protein
chr1B	660040709	660041350	TRITD1Bv1G220140.1	Pol polyprotein
chr1B	660052569	660052889	TRITD1Bv1G220150.1	Transposon protein, putative, Pong sub-class
chr1B	660098806	660099465	TRITD1Bv1G220160.1	Retrotransposon protein, putative, unclassified
chr1B	660169658	660170203	TRITD1Bv1G220170.1	Transposon protein, putative, CACTA, En/Spm sub-class
chr1B	660183144	660432198	TRITD1Bv1G220180.1	Carboxypeptidase
chr1B	660366011	660375340	TRITD1Bv1G220190.1	Ta11-like non-LTR retrotransposon
chr1B	660366011	660375340	TRITD1Bv1G220190.2	Ta11-like non-LTR retrotransposon
chr1B	660432307	660432606	TRITD1Bv1G220200.1	NAD-dependent protein deacylase sirtuin-5, mitochondrial
chr1B	660433798	660435240	TRITD1Bv1G220210.1	ADP-ribosylation factor
chr1B	660437654	660439004	TRITD1Bv1G220220.1	WRKY transcription factor
chr1B	660457017	660458607	TRITD1Bv1G220230.3	Voltage-dependent L-type calcium channel subunit alpha-1C
chr1B	660457566	660458986	TRITD1Bv1G220230.4	WRKY transcription factor
chr1B	660476009	660478324	TRITD1Bv1G220240.1	Subtilisin-like protease
chr1B	660481356	660481706	TRITD1Bv1G220250.1	ferric reduction oxidase 3
chr1B	660482781	660496413	TRITD1Bv1G220260.4	Asparagine synthetase
chr1B	660511198	660511626	TRITD1Bv1G220270.1	RING/U-box superfamily protein, putative
chr1B	660511968	660512771	TRITD1Bv1G220280.1	Urease subunit beta
chr1B	660554126	660554722	TRITD1Bv1G220290.1	Protein FAR1-RELATED SEQUENCE 5
chr1B	660557816	660578862	TRITD1Bv1G220300.1	50S ribosomal protein L16
chr1B	660559553	660578862	TRITD1Bv1G220300.2	Valine--tRNA ligase
chr1B	660573205	660573510	TRITD1Bv1G220310.1	Enolase
chr1B	660578952	660598241	TRITD1Bv1G220320.1	3-methyl-2-oxobutanoate hydroxymethyltransferase
chr1B	660607510	660607890	TRITD1Bv1G220330.1	Retrovirus-related Pol polyprotein from transposon TNT 1-94
chr1B	660617844	660618218	TRITD1Bv1G220350.1	FAR1-related sequence 7
chr1B	660624553	660631044	TRITD1Bv1G220360.4	Sorting nexin-16
chr1B	660645122	660645559	TRITD1Bv1G220370.1	LINE-1 reverse transcriptase-like protein
chr1B	660650453	660652355	TRITD1Bv1G220390.1	Glucan endo-1,3-beta-glucosidase 3
chr1B	660671586	660672032	TRITD1Bv1G220400.1	Retrovirus-related Pol polyprotein from transposon TNT 1-94
chr1B	660690124	660690984	TRITD1Bv1G220410.1	Transposon protein, putative, CACTA, En/Spm sub-class
chr1B	660692064	660692408	TRITD1Bv1G220420.1	Transposon protein, putative, CACTA, En/Spm sub-class
chr1B	660732389	660736199	TRITD1Bv1G220430.1	Acid beta-fructofuranosidase
chr1B	660747128	660747664	TRITD1Bv1G220440.1	gamma-glutamyl transpeptidase 1
chr1B	660752811	660755531	TRITD1Bv1G220450.1	Receptor-like protein kinase, putative,expressed
chr1B	660761349	660764028	TRITD1Bv1G220460.1	Receptor-like protein kinase, putative,expressed
chr1B	660792023	660793144	TRITD1Bv1G220470.1	Cell differentiation protein RCD1-like protein
chr1B	660869209	660876218	TRITD1Bv1G220480.1	Glucan endo-1,3-beta-glucosidase 3
chr1B	660877609	660877965	TRITD1Bv1G220500.1	RNA-directed DNA polymerase (reverse transcriptase)-related family protein
chr1B	660879256	660879663	TRITD1Bv1G220510.1	Phosphatidylinositol mannoside acyltransferase
chr1B	660879886	660882455	TRITD1Bv1G220520.3	Receptor-like protein kinase
chr1B	660885535	660887428	TRITD1Bv1G220530.1	Glucan endo-1,3-beta-glucosidase 3
chr1B	660891620	660894192	TRITD1Bv1G220540.1	Receptor-like protein kinase, putative,expressed
chr1B	660897085	660899823	TRITD1Bv1G220550.1	Receptor-like protein kinase, putative,expressed
chr1B	660900234	660901596	TRITD1Bv1G220560.1	HAT dimerization domain-containing protein
chr1B	660900238	660901596	TRITD1Bv1G220560.2	50S ribosomal protein L14, chloroplastic
chr1B	660901264	660901939	TRITD1Bv1G220560.3	50S ribosomal protein L14, chloroplastic
chr1B	660901593	660901892	TRITD1Bv1G220560.4	DHHC-type zinc finger family protein
chr1B	660901936	660903770	TRITD1Bv1G220560.5	HAT transposon superfamily
chr1B	660906925	660914299	TRITD1Bv1G220570.1	Sugar transporter, putative
chr1B	660910553	660911023	TRITD1Bv1G220580.1	Cysteine-rich receptor kinase
chr1B	660928658	660929641	TRITD1Bv1G220590.1	WRKY family transcription factor
chr1B	660938470	660938853	TRITD1Bv1G220600.1	LINE-1 reverse transcriptase like
chr1B	660983967	660984515	TRITD1Bv1G220610.1	Retrovirus-related Pol polyprotein from transposon TNT 1-94
chr1B	660993771	660995470	TRITD1Bv1G220620.1	S-type anion channel
chr1B	661035031	661094132	TRITD1Bv1G220630.1	Band 7 stomatin family protein
chr1B	661141848	661142279	TRITD1Bv1G220640.1	Retrotransposon protein, putative, Ty3-gypsy subclass
chr1B	661164344	661165962	TRITD1Bv1G220650.1	FAD-binding Berberine family protein
chr1B	661175868	661176215	TRITD1Bv1G220660.1	Retrovirus-related Pol polyprotein from transposon TNT 1-94
chr1B	661198698	661199792	TRITD1Bv1G220670.1	Zinc finger (C3HC4-type RING finger) protein family-like
chr1B	661199241	661200478	TRITD1Bv1G220670.2	C3HC4-type RING finger-containing protein
chr1B	661236814	661239915	TRITD1Bv1G220680.1	Calcium-dependent protein kinase
chr1B	661240729	661243242	TRITD1Bv1G220690.3	Protein ABIL1
chr1B	661242889	661243278	TRITD1Bv1G220700.1	RING-H2 finger C1A
chr1B	661248981	661249316	TRITD1Bv1G220710.1	Retrovirus-related Pol polyprotein from transposon TNT 1-94
chr1B	661355883	661356233	TRITD1Bv1G220740.1	CTC-interacting domain 4
chr1B	661357450	661360602	TRITD1Bv1G220750.1	Translation initiation factor IF-2
chr1B	661434165	661434485	TRITD1Bv1G220760.1	Vesicle-associated membrane protein 714
chr1B	661434887	661435309	TRITD1Bv1G220770.1	Transposon protein, putative, Pong sub-class
chr1B	661436636	661477859	TRITD1Bv1G220780.2	S-type anion channel
chr1B	661497107	661497742	TRITD1Bv1G220790.1	Divalent ion symporter
chr1B	661501231	661503209	TRITD1Bv1G220800.2	S-type anion channel
chr1B	661573112	661573429	TRITD1Bv1G220820.2	DNA-directed RNA polymerase subunit
chr1B	661593366	661593949	TRITD1Bv1G220830.1	Late embryogenesis abundant protein Lea14

## Sheet: QLrusw2B
Annotated genes within the leaf rust resistance QTL interval of Qlr.usw-2BS in Saragolla
Chromosome	Start position	End position	Transcript ID	Annotation
chr2B	9986905	9993238	TRITD2Bv1G004840.7	Protein DA1-related 1
chr2B	10001468	10003936	TRITD2Bv1G004870.3	Serine-rich 25 kDa antigen protein
chr2B	10015129	10016280	TRITD2Bv1G004880.1	Protein PLANT CADMIUM RESISTANCE 2
chr2B	10047893	10048947	TRITD2Bv1G004910.1	Protein FAR1-RELATED SEQUENCE 3
chr2B	10062924	10065549	TRITD2Bv1G004920.1	Serine/threonine-protein kinase
chr2B	10074396	10074920	TRITD2Bv1G004930.1	Retrovirus-related Pol polyprotein from transposon TNT 1-94
chr2B	10077655	10082714	TRITD2Bv1G004940.1	Protein kinase
chr2B	10101254	10105520	TRITD2Bv1G004950.1	Ankyrin repeat protein family-like protein
chr2B	10240547	10248379	TRITD2Bv1G004960.1	Protein kinase
chr2B	10248614	10249725	TRITD2Bv1G004970.1	zinc finger MYM-type-like protein
chr2B	10251354	10252506	TRITD2Bv1G004990.1	Lectin-related protein
chr2B	10257801	10258481	TRITD2Bv1G005000.1	Polynucleotidyl transferase, ribonuclease H-like superfamily protein
chr2B	10266992	10271406	TRITD2Bv1G005010.1	Protein kinase
chr2B	10285934	10286272	TRITD2Bv1G005020.1	Retrotransposon protein, putative, unclassified
chr2B	10287867	10289297	TRITD2Bv1G005030.1	NB-ARC domain-containing disease resistance protein
chr2B	10311817	10312185	TRITD2Bv1G005040.1	Transposon protein, putative, CACTA, En/Spm sub-class
chr2B	10349156	10354893	TRITD2Bv1G005050.1	Meiosis-specific protein PAIR3
chr2B	10403852	10407026	TRITD2Bv1G005060.1	Embryogenesis transmembrane protein-like
chr2B	10407512	10407940	TRITD2Bv1G005070.1	Retrotransposon protein, putative, unclassified
chr2B	10420483	10425070	TRITD2Bv1G005080.2	Pectate lyase
chr2B	10450743	10452200	TRITD2Bv1G005090.1	NB-ARC domain-containing disease resistance protein
chr2B	10452249	10452626	TRITD2Bv1G005100.1	Insulin-like growth factor 1 receptor
chr2B	10454231	10454890	TRITD2Bv1G005110.1	Retrovirus-related Pol polyprotein from transposon TNT 1-94
chr2B	10461824	10462729	TRITD2Bv1G005130.2	NB-ARC domain-containing disease resistance protein
chr2B	10507519	10508475	TRITD2Bv1G005140.1	NB-ARC domain-containing disease resistance protein
chr2B	10508574	10508990	TRITD2Bv1G005150.1	MLOC_58037-like protein
chr2B	10514560	10516050	TRITD2Bv1G005160.1	NB-ARC domain-containing disease resistance protein
chr2B	10520775	10524684	TRITD2Bv1G005170.1	Apyrase
chr2B	10534128	10534871	TRITD2Bv1G005180.1	Transposable element protein, putative
chr2B	10535910	10536224	TRITD2Bv1G005190.1	Myosin phosphatase Rho-interacting protein
chr2B	10536278	10536592	TRITD2Bv1G005200.1	Transposon Ty3-I Gag-Pol polyprotein
chr2B	10578192	10579673	TRITD2Bv1G005210.2	Disease resistance protein RGA2
chr2B	10579447	10579806	TRITD2Bv1G005220.1	DNA helicase MCM8
chr2B	10583371	10583760	TRITD2Bv1G005230.1	LINE-1 reverse transcriptase isogeny
chr2B	10583914	10584705	TRITD2Bv1G005240.1	Retrotransposon protein, putative, unclassified
chr2B	10599654	10601111	TRITD2Bv1G005250.1	NB-ARC domain-containing disease resistance protein
chr2B	10672965	10673579	TRITD2Bv1G005260.1	Retarded palea 1 protein
chr2B	10676460	10676816	TRITD2Bv1G005270.1	Unknown protein
chr2B	10700626	10701108	TRITD2Bv1G005280.1	Retrotransposon protein, putative, Ty3-gypsy subclass
chr2B	10785190	10786587	TRITD2Bv1G005290.1	NB-ARC domain-containing disease resistance protein
chr2B	10789180	10789614	TRITD2Bv1G005300.1	Retrovirus-related Pol polyprotein from transposon TNT 1-94
chr2B	10842762	10843836	TRITD2Bv1G005320.1	protein kinase family protein
chr2B	10842762	10849895	TRITD2Bv1G005320.2	receptor kinase 1
chr2B	10842762	10851368	TRITD2Bv1G005320.3	receptor kinase 1
chr2B	10845945	10849895	TRITD2Bv1G005320.4	Vesicle-associated protein 1-2
chr2B	10886443	10886745	TRITD2Bv1G005330.1	photosystem I light harvesting complex protein 5
chr2B	10938720	10940099	TRITD2Bv1G005340.1	NB-ARC domain-containing disease resistance protein
chr2B	10947096	10947545	TRITD2Bv1G005350.1	Transposon protein, putative, CACTA, En/Spm sub-class
chr2B	10966516	10967730	TRITD2Bv1G005370.1	NB-ARC domain-containing disease resistance protein
chr2B	10969223	10970440	TRITD2Bv1G005380.1	Subtilisin-like protease 6
chr2B	10969448	10970440	TRITD2Bv1G005380.2	S-adenosyl-L-methionine-dependent tRNA 4-demethylwyosine synthase
chr2B	10970803	10973016	TRITD2Bv1G005390.1	Protein FAR1-RELATED SEQUENCE 3
chr2B	10988648	10989226	TRITD2Bv1G005400.1	HAT family dimerization domain-containing protein
chr2B	10988696	10989805	TRITD2Bv1G005400.2	HAT transposon superfamily protein
chr2B	10989907	10990293	TRITD2Bv1G005410.1	HAT transposon superfamily
chr2B	11015541	11016005	TRITD2Bv1G005430.1	Pol polyprotein
chr2B	11044937	11046151	TRITD2Bv1G005440.1	2-oxoglutarate (2OG) and Fe(II)-dependent oxygenase superfamily protein
chr2B	11048148	11048561	TRITD2Bv1G005450.1	no vein-like protein
chr2B	11048802	11049287	TRITD2Bv1G005460.1	F-box/RNI-like superfamily protein
chr2B	11051256	11051600	TRITD2Bv1G005470.1	tRNA N6-adenosine threonylcarbamoyltransferase
chr2B	11051815	11052138	TRITD2Bv1G005480.1	FACT complex subunit SPT16
chr2B	11070106	11074736	TRITD2Bv1G005500.1	Acetyltransferase component of pyruvate dehydrogenase complex
chr2B	11075952	11077002	TRITD2Bv1G005510.1	Alanyl-tRNA synthetase
chr2B	11087531	11088727	TRITD2Bv1G005520.1	DNA-directed RNA polymerase subunit beta'
chr2B	11131466	11132758	TRITD2Bv1G005530.3	calcium sensing receptor
chr2B	11153143	11153445	TRITD2Bv1G005540.1	2-oxoglutarate decarboxylase/hydro-lyase/magnesium ion-binding protein
chr2B	11253621	11254436	TRITD2Bv1G005550.1	Retrotransposon protein, putative, Ty3-gypsy subclass
chr2B	11254189	11254536	TRITD2Bv1G005550.2	ATP-dependent protease ATPase subunit HslU
chr2B	11254545	11254952	TRITD2Bv1G005560.1	Retrotransposon protein, putative, Ty3-gypsy subclass
chr2B	11309739	11310044	TRITD2Bv1G005570.1	Clathrin heavy chain 1
chr2B	11340380	11340778	TRITD2Bv1G005580.1	Retrovirus-related Pol polyprotein from transposon TNT 1-94
chr2B	11353147	11353443	TRITD2Bv1G005600.1	Transposon protein, putative, CACTA, En/Spm sub-class
chr2B	11363927	11364397	TRITD2Bv1G005620.1	Retrotransposon protein, putative, unclassified
chr2B	11377350	11377661	TRITD2Bv1G005640.1	Retrovirus-related Pol polyprotein from transposon TNT 1-94
chr2B	11392552	11394409	TRITD2Bv1G005660.1	Rhomboid-like protein
chr2B	11396613	11396966	TRITD2Bv1G005670.1	2-oxoglutarate (2OG) and Fe(II)-dependent oxygenase superfamily protein
chr2B	11410431	11410961	TRITD2Bv1G005680.1	Retrovirus-related Pol polyprotein from transposon TNT 1-94
chr2B	11416866	11417171	TRITD2Bv1G005690.1	Protein translocase subunit SecA
chr2B	11496655	11498214	TRITD2Bv1G005700.1	Retrovirus-related Pol polyprotein from transposon TNT 1-94
chr2B	11502896	11504377	TRITD2Bv1G005720.1	NBS-LRR-like resistance protein
chr2B	11530657	11531052	TRITD2Bv1G005730.1	Retrotransposon protein, putative, unclassified
chr2B	11629211	11629576	TRITD2Bv1G005740.1	subtilase 1.3
chr2B	11635863	11636174	TRITD2Bv1G005750.1	SLIT and NTRK-like protein 4
chr2B	11704193	11704969	TRITD2Bv1G005760.1	Retrotransposon protein, putative, Ty3-gypsy subclass
chr2B	11740247	11740654	TRITD2Bv1G005780.1	Retrovirus-related Pol polyprotein from transposon TNT 1-94
chr2B	11756580	11756930	TRITD2Bv1G005790.1	Retrotransposon protein, putative, Ty3-gypsy subclass
chr2B	11758740	11759054	TRITD2Bv1G005800.1	Retrotransposon protein, putative, Ty3-gypsy subclass, expressed
chr2B	11765489	11765794	TRITD2Bv1G005810.1	Transposon protein, putative, CACTA, En/Spm sub-class
chr2B	11783389	11784561	TRITD2Bv1G005820.1	Transcription elongation factor (TFIIS) family protein
chr2B	11870277	11870576	TRITD2Bv1G005830.1	Retrotransposon protein, putative, unclassified
chr2B	11892991	11893296	TRITD2Bv1G005840.1	Ribulose bisphosphate carboxylase small chain
chr2B	11903495	11904283	TRITD2Bv1G005850.1	Retrovirus-related Pol polyprotein from transposon TNT 1-94
chr2B	11917735	11926770	TRITD2Bv1G005860.3	receptor kinase 1
chr2B	11926801	11928738	TRITD2Bv1G005870.1	inter-alpha-trypsin inhibitor heavy chain-like protein
chr2B	11954427	11959666	TRITD2Bv1G005880.9	receptor kinase 1
chr2B	11992080	11993561	TRITD2Bv1G005890.1	NB-ARC domain-containing disease resistance protein
chr2B	11999336	11999755	TRITD2Bv1G005900.1	Gag-Pol polyprotein
chr2B	12006370	12007160	TRITD2Bv1G005910.1	Nuclear factor erythroid 2-related factor 1
chr2B	12019941	12020201	TRITD2Bv1G005920.1	Disease resistance protein RGA2
chr2B	12020361	12021513	TRITD2Bv1G005930.1	NB-ARC domain-containing disease resistance protein
chr2B	12026375	12030826	TRITD2Bv1G005940.1	Apyrase
chr2B	12036156	12036857	TRITD2Bv1G005950.1	Disease resistance protein RGA2
chr2B	12036899	12037645	TRITD2Bv1G005960.1	NB-ARC domain-containing disease resistance protein
chr2B	12069353	12069727	TRITD2Bv1G005970.1	Retrotransposon protein, putative, Ty3-gypsy subclass
chr2B	12078304	12078633	TRITD2Bv1G005980.1	Retrotransposon protein, putative, unclassified
chr2B	12101675	12102364	TRITD2Bv1G005990.1	NBS-LRR-like resistance protein
chr2B	12109075	12109683	TRITD2Bv1G006000.1	NB-ARC domain-containing disease resistance protein
chr2B	12117510	12119963	TRITD2Bv1G006010.1	Serine/threonine-protein kinase
chr2B	12125864	12370495	TRITD2Bv1G006020.1	Glycosyltransferase
chr2B	12152718	12153339	TRITD2Bv1G006030.1	Adenosylhomocysteinase
chr2B	12199924	12200400	TRITD2Bv1G006040.1	Dirigent protein
chr2B	12210668	12264162	TRITD2Bv1G006050.1	Glycosyltransferase
chr2B	12227437	12228300	TRITD2Bv1G006060.1	NBS-LRR-like resistance protein
chr2B	12232147	12232449	TRITD2Bv1G006070.1	Coatomer, beta subunit
chr2B	12238421	12238657	TRITD2Bv1G006080.1	Transposon protein, putative, Mutator sub-class
chr2B	12374737	12375048	TRITD2Bv1G006090.1	LINE-1 reverse transcriptase like
chr2B	12378892	12380728	TRITD2Bv1G006100.1	Cytochrome P450-like protein
chr2B	12411736	12412855	TRITD2Bv1G006110.1	Transposon protein, putative, CACTA, En/Spm sub-class
chr2B	12414787	12416350	TRITD2Bv1G006110.12	zinc finger (C2H2 type) family protein
chr2B	12416451	12418202	TRITD2Bv1G006110.15	En/Spm-like transposon protein
chr2B	12443215	12443790	TRITD2Bv1G006120.1	transmembrane protein, putative (DUF594)
chr2B	12444596	12444967	TRITD2Bv1G006130.1	oxidoreductase, 2OG-Fe(II) oxygenase family protein
chr2B	12462799	12464874	TRITD2Bv1G006150.1	transmembrane protein, putative (DUF594)
chr2B	12467625	12469124	TRITD2Bv1G006160.1	NBS-LRR-like resistance protein
chr2B	12476222	12478204	TRITD2Bv1G006170.1	transmembrane protein, putative (DUF594)
chr2B	12478464	12479063	TRITD2Bv1G006180.1	RNA-directed DNA polymerase (reverse transcriptase)-related family protein
chr2B	12505972	12506337	TRITD2Bv1G006190.1	Retrovirus-related Pol polyprotein from transposon TNT 1-94
chr2B	12640877	12641221	TRITD2Bv1G006230.1	D-aminoacyl-tRNA deacylase
chr2B	12661254	12661601	TRITD2Bv1G006240.1	NBS-LRR-like resistance protein
chr2B	12663671	12665170	TRITD2Bv1G006250.1	NBS-LRR-like resistance protein
chr2B	12683536	12685653	TRITD2Bv1G006260.1	transmembrane protein, putative (DUF594)
chr2B	12688237	12688728	TRITD2Bv1G006270.1	NBS-LRR resistance-like protein
chr2B	12688725	12690101	TRITD2Bv1G006270.2	NBS-LRR resistance-like protein
chr2B	12692543	12692906	TRITD2Bv1G006280.1	Protein FAR1-RELATED SEQUENCE 5
chr2B	12696327	12698201	TRITD2Bv1G006290.1	Sentrin-specific protease
chr2B	12697186	12700776	TRITD2Bv1G006290.2	Sister chromatid cohesion protein PDS5 like B
chr2B	12697186	12701597	TRITD2Bv1G006290.3	Hippocampus abundant transcript-like protein 1
chr2B	12701658	12702161	TRITD2Bv1G006300.1	Aminotransferase-like, plant mobile domain-containing protein
chr2B	12702419	12702808	TRITD2Bv1G006310.1	ferric reduction oxidase 6
chr2B	12702751	12707382	TRITD2Bv1G006310.2	NBS-LRR-like resistance protein
chr2B	12704642	12706741	TRITD2Bv1G006310.3	Flagellar P-ring protein
chr2B	12704642	12707382	TRITD2Bv1G006310.4	NBS-LRR-like resistance protein
chr2B	12706118	12706453	TRITD2Bv1G006320.1	FAR1-related sequence 1
chr2B	12707570	12707872	TRITD2Bv1G006330.1	RGA1
chr2B	12721772	12722098	TRITD2Bv1G006340.1	Helicase/SANT-associated, DNA binding protein
chr2B	12723173	12730926	TRITD2Bv1G006350.3	lectin-receptor kinase
chr2B	12733309	12763317	TRITD2Bv1G006360.1	Embryogenesis transmembrane protein-like
chr2B	12765025	12765381	TRITD2Bv1G006370.1	Retrovirus-related Pol polyprotein from transposon TNT 1-94
chr2B	12775769	12776828	TRITD2Bv1G006380.1	Cytochrome P450 family protein, expressed
chr2B	12779216	12779725	TRITD2Bv1G006390.1	Cytochrome P450
chr2B	12783647	12784342	TRITD2Bv1G006400.1	Retrovirus-related Pol polyprotein from transposon TNT 1-94
chr2B	12796261	12796590	TRITD2Bv1G006410.1	nitrile specifier protein 2
chr2B	12831134	12831670	TRITD2Bv1G006420.1	Solute carrier family 2, facilitated glucose transporter member 10
chr2B	12832515	12833141	TRITD2Bv1G006430.1	Protein FAR1-RELATED SEQUENCE 3
chr2B	12833353	12834176	TRITD2Bv1G006440.1	Far1-like
chr2B	12834237	12835211	TRITD2Bv1G006450.1	FAR1-related sequence protein, putative
chr2B	12859400	12859783	TRITD2Bv1G006460.1	K-box region and MADS-box transcription factor family protein
chr2B	12875971	12876755	TRITD2Bv1G006470.2	Terpene synthase
chr2B	12877723	12880397	TRITD2Bv1G006480.2	CDT1-like protein a, chloroplastic
chr2B	12927851	12928210	TRITD2Bv1G006490.1	Retrovirus-related Pol polyprotein from transposon TNT 1-94
chr2B	12948603	12948917	TRITD2Bv1G006500.1	Retrotransposon protein, putative, Ty3-gypsy subclass
chr2B	13011439	13015688	TRITD2Bv1G006510.4	RING/U-box superfamily protein
chr2B	13019945	13024532	TRITD2Bv1G006520.2	Formamidopyrimidine-DNA glycosylase
chr2B	13088442	13089065	TRITD2Bv1G006530.1	Retrovirus-related Pol polyprotein from transposon TNT 1-94
chr2B	13128745	13129163	TRITD2Bv1G006540.1	ATP synthase subunit b 2
chr2B	13144764	13145612	TRITD2Bv1G006550.1	Terpene synthase
chr2B	13145362	13145562	TRITD2Bv1G006550.2	Acyl-coenzyme A oxidase 4, peroxisomal
chr2B	13188067	13188369	TRITD2Bv1G006560.1	Transposon protein, putative, CACTA, En/Spm sub-class
chr2B	13264020	13264445	TRITD2Bv1G006570.1	Gag-Pol polyprotein
chr2B	13291123	13291791	TRITD2Bv1G006580.1	CDT1-like protein a, chloroplastic
chr2B	13305904	13308322	TRITD2Bv1G006590.1	Myrcene synthase, chloroplastic
chr2B	13389697	13392529	TRITD2Bv1G006610.1	Cytochrome P450
chr2B	13390645	13391031	TRITD2Bv1G006620.1	ARM repeat superfamily protein
chr2B	13409178	13409840	TRITD2Bv1G006630.1	RNA-directed DNA polymerase (reverse transcriptase)-related family protein
chr2B	13414501	13416024	TRITD2Bv1G006640.2	Myrcene synthase, chloroplastic
chr2B	13488438	13490857	TRITD2Bv1G006680.1	Cytochrome P450 family protein, expressed
chr2B	13537757	13540226	TRITD2Bv1G006690.4	Myrcene synthase, chloroplastic
chr2B	13761882	13768700	TRITD2Bv1G006700.1	Cytochrome P450
chr2B	13781131	13781603	TRITD2Bv1G006710.1	Myrcene synthase, chloroplastic
chr2B	13783271	13783642	TRITD2Bv1G006720.1	Retrovirus-related Pol polyprotein from transposon TNT 1-94
chr2B	13805895	13808737	TRITD2Bv1G006730.1	ATP-dependent Clp protease adapter protein ClpS
chr2B	13835945	13836244	TRITD2Bv1G006740.1	lysine ketoglutarate reductase trans-splicing-like protein (DUF707)
chr2B	13861376	13861726	TRITD2Bv1G006750.1	Retrovirus-related Pol polyprotein from transposon TNT 1-94
chr2B	13876446	13877171	TRITD2Bv1G006770.1	Retrotransposon protein, putative, Ty3-gypsy subclass
chr2B	13912711	13913079	TRITD2Bv1G006780.1	PQ-loop repeat family protein / transmembrane family protein
chr2B	13913841	13916411	TRITD2Bv1G006790.1	Cytochrome P450
chr2B	13937938	13938318	TRITD2Bv1G006800.1	Myosin regulatory light chain 2, skeletal muscle isoform
chr2B	13937938	13938597	TRITD2Bv1G006800.2	Myosin regulatory light chain 2, skeletal muscle isoform type 2
chr2B	13956898	13957218	TRITD2Bv1G006810.1	Transposon protein, putative, CACTA, En/Spm sub-class
chr2B	14052568	14054346	TRITD2Bv1G006820.1	Cytochrome P450
chr2B	14082288	14083965	TRITD2Bv1G006830.1	Cytochrome P450
chr2B	14148344	14148649	TRITD2Bv1G006840.1	Transposon protein, putative, CACTA, En/Spm sub-class
chr2B	14199183	14199527	TRITD2Bv1G006850.1	Transposon protein, putative, Mutator sub-class, expressed
chr2B	14222013	14222336	TRITD2Bv1G006860.1	GMP synthase [glutamine-hydrolyzing]
chr2B	14263143	14263484	TRITD2Bv1G006870.1	Retrotransposon protein, putative, unclassified
chr2B	14275944	14276273	TRITD2Bv1G006880.1	NAD(P)-binding Rossmann-fold superfamily protein
chr2B	14318626	14320342	TRITD2Bv1G006890.1	Cytochrome P450
chr2B	14323721	14324242	TRITD2Bv1G006900.1	Protein translocase subunit SecA 1
chr2B	14324678	14325224	TRITD2Bv1G006910.1	zinc/iron-chelating domain protein
chr2B	14345071	14345643	TRITD2Bv1G006920.1	Cytochrome P450 family protein, expressed
chr2B	14420662	14420997	TRITD2Bv1G007000.1	Copia-like polyprotein
chr2B	14429622	14430922	TRITD2Bv1G007010.1	Protein kinase superfamily protein
chr2B	14451870	14470317	TRITD2Bv1G007020.2	Cytochrome P450 family protein, expressed
chr2B	14457084	14457850	TRITD2Bv1G007030.1	Cytochrome P450
chr2B	14484180	14484590	TRITD2Bv1G007040.1	Transposon protein, putative, CACTA, En/Spm sub-class
chr2B	14512481	14514197	TRITD2Bv1G007060.1	Cytochrome P450
chr2B	14700417	14702116	TRITD2Bv1G007070.1	Myrcene synthase, chloroplastic
chr2B	14724839	14725354	TRITD2Bv1G007090.1	Pol polyprotein
chr2B	14728583	14735933	TRITD2Bv1G007100.1	TSL-kinase interacting protein 1
chr2B	14777445	14778155	TRITD2Bv1G007110.1	Retrovirus-related Pol polyprotein from transposon TNT 1-94
chr2B	14794208	14795918	TRITD2Bv1G007120.1	Cytochrome P450
chr2B	14824480	14824824	TRITD2Bv1G007130.1	2-succinyl-5-enolpyruvyl-6-hydroxy-3-cyclohexene-1-carboxylate synthase
chr2B	14824863	14825294	TRITD2Bv1G007140.1	basic helix-loop-helix (bHLH) DNA-binding superfamily protein
chr2B	14851144	14852099	TRITD2Bv1G007150.1	Serpin-like protein
chr2B	14857557	14859608	TRITD2Bv1G007170.1	Receptor-like kinase
chr2B	14868843	14869181	TRITD2Bv1G007180.1	Serpin-like protein
chr2B	14869381	14870336	TRITD2Bv1G007190.1	Serpin-like protein
chr2B	14925817	14926725	TRITD2Bv1G007200.1	Omega-6 fatty acid desaturase, endoplasmic reticulum isozyme 2
chr2B	14930339	14930749	TRITD2Bv1G007210.1	Retrovirus-related Pol polyprotein from transposon TNT 1-94
chr2B	14944520	14948411	TRITD2Bv1G007220.1	NBS-LRR-like resistance protein
chr2B	15010013	15022097	TRITD2Bv1G007230.1	receptor kinase 1
chr2B	15010187	15022097	TRITD2Bv1G007230.2	receptor kinase 1
chr2B	15056468	15080119	TRITD2Bv1G007240.2	Disease resistance protein (NBS-LRR class) family
chr2B	15081109	15087938	TRITD2Bv1G007250.2	NBS-LRR-like resistance protein
chr2B	15092451	15096182	TRITD2Bv1G007260.1	receptor kinase 1
chr2B	15113911	15114856	TRITD2Bv1G007270.1	RING/FYVE/PHD zinc finger superfamily protein
chr2B	15122880	15123212	TRITD2Bv1G007280.1	(DL)-glycerol-3-phosphatase 2
chr2B	15152588	15153496	TRITD2Bv1G007290.1	Integrase-type DNA-binding superfamily protein
chr2B	15154563	15155545	TRITD2Bv1G007300.1	Jasmonate-induced protein
chr2B	15181354	15181728	TRITD2Bv1G007310.1	piezo-type mechanosensitive ion channel component
chr2B	15181521	15181955	TRITD2Bv1G007310.2	Acetyl-CoA decarbonylase/synthase complex subunit alpha 1
chr2B	15193086	15193545	TRITD2Bv1G007320.1	ABC-2 type transporter family protein
chr2B	15271707	15272099	TRITD2Bv1G007330.1	Transposon protein, putative, CACTA, En/Spm sub-class
chr2B	15328195	15328965	TRITD2Bv1G007340.1	Retrotransposon protein, putative, unclassified
chr2B	15470221	15470562	TRITD2Bv1G007350.1	Retrotransposon protein, putative, Ty3-gypsy subclass
chr2B	15585810	15587738	TRITD2Bv1G007370.2	receptor kinase 1
chr2B	15589188	15590069	TRITD2Bv1G007380.1	Glycosyltransferase
chr2B	15630833	15632470	TRITD2Bv1G007400.2	Receptor-like protein kinase
chr2B	15644845	15645322	TRITD2Bv1G007410.1	Defensin
chr2B	15684330	15684861	TRITD2Bv1G007430.1	Receptor-like protein kinase
chr2B	15684330	15686489	TRITD2Bv1G007430.2	receptor kinase 1
chr2B	15707161	15709249	TRITD2Bv1G007440.4	GDSL esterase/lipase
chr2B	15711304	15713726	TRITD2Bv1G007450.1	Carboxyl methyltransferase
chr2B	15721167	15723131	TRITD2Bv1G007460.1	Protein kinase, putative
chr2B	15784509	15786270	TRITD2Bv1G007470.3	Glutamyl-tRNA (Gln) amidotransferase subunit A
chr2B	15804485	15806566	TRITD2Bv1G007390.11	receptor kinase 1
chr2B	15838562	15841457	TRITD2Bv1G007480.2	receptor kinase 1
chr2B	15846893	15847763	TRITD2Bv1G007490.1	Glutamyl-tRNA (Gln) amidotransferase subunit A
chr2B	15854637	15855185	TRITD2Bv1G007510.1	Protein UPSTREAM OF FLC
chr2B	15891737	15893627	TRITD2Bv1G007520.5	Protein MID1-COMPLEMENTING ACTIVITY 1
chr2B	15894312	15894742	TRITD2Bv1G007530.1	Receptor kinase-like protein
chr2B	15905129	15905756	TRITD2Bv1G007540.1	Glutamyl-tRNA (Gln) amidotransferase subunit A
chr2B	15923669	15925153	TRITD2Bv1G007550.1	Cytochrome P450
chr2B	15976977	15985199	TRITD2Bv1G007570.1	Glutamyl-tRNA (Gln) amidotransferase subunit A
chr2B	15985704	15986003	TRITD2Bv1G007580.1	Inner capsid protein lambda-1
chr2B	15989334	15989633	TRITD2Bv1G007590.1	Inner capsid protein lambda-1
chr2B	15993938	15995139	TRITD2Bv1G007600.1	Glutamyl-tRNA (Gln) amidotransferase subunit A
chr2B	16001430	16003294	TRITD2Bv1G007610.4	Kinase family protein
chr2B	16180124	16181424	TRITD2Bv1G007650.1	Peptide methionine sulfoxide reductase MsrA/MsrB
chr2B	16183681	16184644	TRITD2Bv1G007660.1	Receptor-like protein kinase
chr2B	16189826	16194985	TRITD2Bv1G007670.4	receptor kinase 1
chr2B	16226759	16227103	TRITD2Bv1G007690.1	Transposon protein, putative, CACTA, En/Spm sub-class
chr2B	16234121	16236263	TRITD2Bv1G007700.2	receptor kinase 1
chr2B	16236569	16236916	TRITD2Bv1G007710.1	DWNN domain, a CCHC-type zinc finger
chr2B	16237904	16238293	TRITD2Bv1G007720.1	Lysine--tRNA ligase
chr2B	16240454	16241358	TRITD2Bv1G007730.1	ubiquitin-specific protease 13
chr2B	16241366	16652146	TRITD2Bv1G007740.2	Cytochrome P450
chr2B	16247704	16258701	TRITD2Bv1G007750.3	Cytochrome P450
chr2B	16437806	16438087	TRITD2Bv1G007770.1	Protopine 6-monooxygenase
chr2B	16454018	16456431	TRITD2Bv1G007780.1	receptor kinase 1
chr2B	16464176	16464731	TRITD2Bv1G007790.1	Receptor-like protein kinase
chr2B	16484203	16488713	TRITD2Bv1G007800.1	Ankyrin repeat protein family-like protein
chr2B	16505858	16508580	TRITD2Bv1G007810.1	Disease resistance protein RPM1
chr2B	16515277	16515764	TRITD2Bv1G007820.1	Protein kinase
chr2B	16516546	16517436	TRITD2Bv1G007830.1	Receptor kinase-like protein
chr2B	16518933	16519999	TRITD2Bv1G007840.1	Amidase
chr2B	16520346	16520987	TRITD2Bv1G007850.1	Phosphoenolpyruvate carboxylase family protein
chr2B	16531458	16531832	TRITD2Bv1G007860.1	Glutamyl-tRNA(Gln) amidotransferase subunit A
chr2B	16534035	16535543	TRITD2Bv1G007870.1	Cytochrome P450
chr2B	16655859	16656773	TRITD2Bv1G007900.1	Glutamyl-tRNA (Gln) amidotransferase subunit A
chr2B	16661651	16662394	TRITD2Bv1G007920.1	NAD(P)H dehydrogenase B3
chr2B	16662686	16663153	TRITD2Bv1G007930.1	Mutator-like transposase
chr2B	16663252	16664286	TRITD2Bv1G007940.1	Transposon protein, putative, mutator sub-class
chr2B	16669879	16670109	TRITD2Bv1G007950.1	Glutamyl-tRNA(Gln) amidotransferase subunit A, putative
chr2B	16682394	16683338	TRITD2Bv1G007960.1	Retrotransposon protein, putative, unclassified
chr2B	16683584	16684111	TRITD2Bv1G007970.1	Aspartyl/glutamyl-tRNA(Asn/Gln) amidotransferase subunit B
chr2B	16694314	16695036	TRITD2Bv1G007980.1	Lysine ketoglutarate reductase/saccharopine dehydrogenase
chr2B	16695537	16696022	TRITD2Bv1G008000.1	Acyl-CoA thioesterase family protein
chr2B	16695650	16696099	TRITD2Bv1G008010.1	Dynamin-2
chr2B	16696367	16696897	TRITD2Bv1G008020.1	Amidase
chr2B	16716135	16723403	TRITD2Bv1G008030.1	Disease resistance protein (NBS-LRR class) family
chr2B	16725187	16733723	TRITD2Bv1G008040.1	Lysine ketoglutarate reductase/saccharopine dehydrogenase
chr2B	16728411	16728605	TRITD2Bv1G008050.1	Tetratricopeptide repeat (TPR)-like superfamily protein
chr2B	16729734	16731971	TRITD2Bv1G008060.1	equilibrative nucleoside transporter 6
chr2B	16734337	16734786	TRITD2Bv1G008070.1	Dynamin-2
chr2B	16744303	16748374	TRITD2Bv1G008080.1	receptor kinase 1
chr2B	16744351	16745793	TRITD2Bv1G008080.2	receptor kinase 1
chr2B	16836019	16836384	TRITD2Bv1G008090.1	Retrotransposon protein, putative, unclassified
chr2B	16836823	16837152	TRITD2Bv1G008100.1	Transposon TX1 uncharacterized
chr2B	16837242	16838129	TRITD2Bv1G008110.1	LINE-1 reverse transcriptase-like protein
chr2B	16845560	16849760	TRITD2Bv1G008120.3	NBS-LRR-like resistance protein
chr2B	16868418	16869068	TRITD2Bv1G008130.1	Retrovirus-related Pol polyprotein from transposon TNT 1-94
chr2B	16875978	16876403	TRITD2Bv1G008160.1	Retrovirus-related Pol polyprotein from transposon 17.6
chr2B	16952617	16968795	TRITD2Bv1G008170.6	Glycine-rich protein
chr2B	16976015	16976425	TRITD2Bv1G008180.1	Retrovirus-related Pol polyprotein from transposon TNT 1-94
chr2B	17006780	17008024	TRITD2Bv1G008210.1	Subtilisin-like protease
chr2B	17009039	17012573	TRITD2Bv1G008220.2	Receptor protein kinase, putative
chr2B	17040801	17042087	TRITD2Bv1G008230.1	Chalcone synthase
chr2B	17065825	17067687	TRITD2Bv1G008240.2	2-oxoglutarate (2OG) and Fe(II)-dependent oxygenase superfamily protein, putative
chr2B	17088934	17089472	TRITD2Bv1G008250.1	Retrovirus-related Pol polyprotein from transposon TNT 1-94
chr2B	17103144	17103506	TRITD2Bv1G008270.1	Disease resistance protein RPP13
chr2B	17151967	17152497	TRITD2Bv1G008280.1	Chromosome partition protein MukB
chr2B	17238097	17367999	TRITD2Bv1G008290.1	2-isopropylmalate synthase
chr2B	17356480	17356818	TRITD2Bv1G008300.1	pleiotropic drug resistance 5
chr2B	17357705	17357902	TRITD2Bv1G008310.1	DNA ligase
chr2B	17381540	17388149	TRITD2Bv1G008260.25	Disease resistance protein (NBS-LRR class) family
chr2B	17401481	17401903	TRITD2Bv1G008320.1	Ankyrin repeat protein-like
chr2B	17401944	17410805	TRITD2Bv1G008330.1	Ankyrin repeat protein-like
chr2B	17460181	17461571	TRITD2Bv1G008340.1	Leucine-rich repeat (LRR) family protein
chr2B	17474319	17476506	TRITD2Bv1G008350.1	Protein FAR1-RELATED SEQUENCE 5
chr2B	17476528	17477617	TRITD2Bv1G008360.1	Protein FAR1-RELATED SEQUENCE 3
chr2B	17518826	17520209	TRITD2Bv1G008370.1	Disease resistance protein RPM1
chr2B	17520274	17520858	TRITD2Bv1G008380.1	NBS-LRR-like resistance protein
chr2B	17520794	17522487	TRITD2Bv1G008380.2	Disease resistance protein (NBS-LRR class) family
chr2B	17640211	17640631	TRITD2Bv1G008390.1	2-oxoglutarate (2OG) and Fe(II)-dependent oxygenase superfamily protein, putative
chr2B	17651627	17653737	TRITD2Bv1G008400.1	1-aminocyclopropane-1-carboxylate oxidase homolog 2
chr2B	17654559	17655329	TRITD2Bv1G008410.1	2-oxoglutarate (2OG) and Fe(II)-dependent oxygenase superfamily protein
chr2B	17723250	17724572	TRITD2Bv1G008440.1	phosphatidyl inositol monophosphate 5 kinase 4
chr2B	17733781	17735434	TRITD2Bv1G008450.1	2-oxoglutarate (2OG) and Fe(II)-dependent oxygenase superfamily protein
chr2B	17765317	17767347	TRITD2Bv1G008460.1	Retrovirus-related Pol polyprotein from transposon TNT 1-94
chr2B	17792650	17815924	TRITD2Bv1G008490.2	2-oxoglutarate (2OG) and Fe(II)-dependent oxygenase superfamily protein, putative
chr2B	17826299	17827528	TRITD2Bv1G008500.6	12-oxophytodienoate reductase-like protein
chr2B	17835490	17835891	TRITD2Bv1G008520.1	tRNA (guanine-N(1)-)-methyltransferase
chr2B	17842791	17846826	TRITD2Bv1G008530.1	2-oxoglutarate (2OG) and Fe(II)-dependent oxygenase superfamily protein, putative
chr2B	17861490	17862050	TRITD2Bv1G008540.1	Retrotransposon protein, putative, Ty3-gypsy subclass
chr2B	17975677	17984746	TRITD2Bv1G008560.3	Copalyl diphosphate synthase
chr2B	17985849	17990581	TRITD2Bv1G008570.2	Kaurene synthase
chr2B	17996621	18001358	TRITD2Bv1G008580.1	Copalyl diphosphate synthase
chr2B	18006461	18007075	TRITD2Bv1G008590.1	Retrotransposon protein, putative, unclassified
chr2B	18007799	18008809	TRITD2Bv1G008600.1	LINE-1 reverse transcriptase like
chr2B	18009182	18009553	TRITD2Bv1G008610.1	Ribonuclease H-like superfamily protein
chr2B	18014416	18019761	TRITD2Bv1G008620.1	Copalyl diphosphate synthase
chr2B	18019683	18020649	TRITD2Bv1G008620.2	Copalyl diphosphate synthase
chr2B	18027837	18032327	TRITD2Bv1G008630.1	Agenet domain, putative
chr2B	18030275	18032904	TRITD2Bv1G008630.2	Agenet domain, putative
chr2B	18046200	18046550	TRITD2Bv1G008640.1	Transposon protein, putative, CACTA, En/Spm sub-class
chr2B	18203335	18204000	TRITD2Bv1G008650.1	Retrotransposon protein, putative, Ty3-gypsy subclass
chr2B	18328303	18328899	TRITD2Bv1G008660.1	Transposon protein, putative, CACTA, En/Spm sub-class
chr2B	18335251	18403874	TRITD2Bv1G008670.5	Glycosyltransferase
chr2B	18411583	18416388	TRITD2Bv1G008680.1	Copalyl diphosphate synthase
chr2B	18446300	18446506	TRITD2Bv1G008690.1	Subtilisin-like protease
chr2B	18447918	18459803	TRITD2Bv1G008700.6	Actin-related protein
chr2B	18461105	18463384	TRITD2Bv1G008710.1	HR-like lesion-inducing protein-like protein
chr2B	18497494	18500738	TRITD2Bv1G008720.1	Kaurene synthase-like protein
chr2B	18518771	18519256	TRITD2Bv1G008730.1	Reticuline oxidase
chr2B	18534856	18535455	TRITD2Bv1G008740.1	Retrotransposon protein, putative, Ty3-gypsy subclass
chr2B	18552101	18555062	TRITD2Bv1G008750.1	Agenet domain, putative
chr2B	18554766	18556122	TRITD2Bv1G008750.2	Agenet domain, putative
chr2B	18572626	18577175	TRITD2Bv1G008760.1	O-methyltransferase family protein
chr2B	18592242	18594120	TRITD2Bv1G008770.1	Chalcone synthase
chr2B	18596308	18597088	TRITD2Bv1G008780.1	Glycosyltransferase
chr2B	18597066	18682058	TRITD2Bv1G008790.1	Leucine-rich repeat transmembrane protein kinase
chr2B	18597272	18597730	TRITD2Bv1G008800.1	Glycosyltransferase
chr2B	18681045	18682362	TRITD2Bv1G008810.2	Glycosyltransferase
chr2B	18683400	18691275	TRITD2Bv1G008820.1	PAIR1 protein, putative, expressed
chr2B	18696916	18706549	TRITD2Bv1G008830.1	ABC transporter B family protein
chr2B	18705306	18705719	TRITD2Bv1G008840.1	PAP/OAS1 substrate-binding domain superfamily
chr2B	18706952	18707323	TRITD2Bv1G008850.1	Zinc finger CCCH domain-containing protein 15
chr2B	18709933	18710959	TRITD2Bv1G008870.1	Erythronate-4-phosphate dehydrogenase
chr2B	18711950	18714370	TRITD2Bv1G008860.3	Glycosyltransferase
chr2B	18724803	18726308	TRITD2Bv1G008880.1	XS domain-containing protein / XS zinc finger domain-containing protein-like protein
chr2B	18726232	18730001	TRITD2Bv1G008880.2	PAIR1 protein, putative, expressed
chr2B	18731283	18732868	TRITD2Bv1G008890.2	Glycosyltransferase
chr2B	18754085	18754276	TRITD2Bv1G008920.1	chromatin remodeling 31
chr2B	18768530	18768832	TRITD2Bv1G008930.1	Transposon Ty3-I Gag-Pol polyprotein
chr2B	18770289	18770951	TRITD2Bv1G008940.1	Gag-Pol polyprotein
chr2B	18770891	18771412	TRITD2Bv1G008940.2	Pol polyprotein
chr2B	18800577	18801819	TRITD2Bv1G008950.1	P-loop containing nucleoside triphosphate hydrolases superfamily protein
chr2B	18800714	18801295	TRITD2Bv1G008950.2	myosin heavy chain, embryonic smooth protein
chr2B	18802461	18804552	TRITD2Bv1G008960.2	Exocyst complex protein exo70
chr2B	18814693	18815059	TRITD2Bv1G008970.1	50S ribosomal protein L14
chr2B	18814787	18815098	TRITD2Bv1G008970.2	50S ribosomal protein L14
chr2B	18849908	18850414	TRITD2Bv1G008980.1	Retrotransposon protein, putative, unclassified
chr2B	18899188	18899658	TRITD2Bv1G008990.1	Cytochrome c oxidase subunit 2
chr2B	18925994	18926335	TRITD2Bv1G009000.1	carbonic anhydrase 2
chr2B	18926717	18927022	TRITD2Bv1G009010.1	Transposable element protein, putative, Retrotrans_gag
chr2B	18978339	18978773	TRITD2Bv1G009020.1	lsd one like 1
chr2B	18984825	18985283	TRITD2Bv1G009030.1	Transposon protein, putative, CACTA, En/Spm sub-class
chr2B	18988956	18990188	TRITD2Bv1G009040.1	Retrovirus-related Pol polyprotein from transposon TNT 1-94
chr2B	19003271	19004579	TRITD2Bv1G009090.1	Exocyst complex component 7
chr2B	19003857	19004997	TRITD2Bv1G009090.2	ascorbic acid mannose pathway regulator (DUF295)
chr2B	19011990	19012397	TRITD2Bv1G009100.1	Retrotransposon protein, putative, Ty1-copia subclass
chr2B	19021148	19021523	TRITD2Bv1G009110.1	TIR-NBS-LRR disease resistance protein
chr2B	19021164	19021523	TRITD2Bv1G009110.2	Aromatase
chr2B	19021325	19021777	TRITD2Bv1G009120.1	DNA mismatch repair protein MutS
chr2B	19021758	19025135	TRITD2Bv1G009130.1	NBS-LRR-like resistance protein
chr2B	19099824	19100144	TRITD2Bv1G009140.1	Retrotransposon protein, putative, unclassified
chr2B	19202927	19205755	TRITD2Bv1G009180.1	Disease resistance protein (TIR-NBS-LRR class) family
chr2B	19241028	19241811	TRITD2Bv1G009190.1	Phenylalanine--tRNA ligase alpha subunit
chr2B	19241028	19242725	TRITD2Bv1G009190.2	CC-NBS-LRR disease resistance protein
chr2B	19241028	19242725	TRITD2Bv1G009190.3	Disease resistance protein (NBS-LRR class) family
chr2B	19241028	19242725	TRITD2Bv1G009190.4	Disease resistance protein (NBS-LRR class) family
chr2B	19243462	19244367	TRITD2Bv1G009200.1	Disease resistance protein (TIR-NBS-LRR class) family
chr2B	19248188	19250410	TRITD2Bv1G009210.1	Disease resistance protein
chr2B	19252002	19252472	TRITD2Bv1G009220.1	Retrovirus-related Pol polyprotein from transposon TNT 1-94
chr2B	19255739	19256185	TRITD2Bv1G009230.1	NBS-LRR disease resistance protein
chr2B	19261814	19262152	TRITD2Bv1G009240.1	Retrovirus-related Pol polyprotein from transposon TNT 1-94
chr2B	19276661	19277191	TRITD2Bv1G009270.1	Retrotransposon protein, putative, Ty3-gypsy subclass
chr2B	19317113	19317622	TRITD2Bv1G009280.1	GTP-binding 2
chr2B	19414689	19415027	TRITD2Bv1G009330.1	Retrotransposon protein, putative, Ty3-gypsy subclass
chr2B	19426777	19427004	TRITD2Bv1G009340.1	DNAse I-like superfamily protein
chr2B	19428625	19428963	TRITD2Bv1G009350.1	Methionine synthase
chr2B	19450751	19451341	TRITD2Bv1G009360.1	Retrovirus-related Pol polyprotein from transposon TNT 1-94
chr2B	19521398	19526507	TRITD2Bv1G009380.1	Exocyst complex component, putative
chr2B	19521599	19526507	TRITD2Bv1G009380.2	Exocyst complex component, putative
chr2B	19528345	19528740	TRITD2Bv1G009390.1	Retrovirus-related Pol polyprotein from transposon TNT 1-94
chr2B	19534417	19534776	TRITD2Bv1G009400.1	LINE-1 reverse transcriptase like
chr2B	19541768	19546283	TRITD2Bv1G009410.1	Exocyst complex component, putative
chr2B	19541768	19546283	TRITD2Bv1G009410.2	Exocyst complex component, putative
chr2B	19588545	19590505	TRITD2Bv1G009470.1	Exocyst complex component, putative
chr2B	19685581	19687002	TRITD2Bv1G009480.1	Dihydroflavonol reductase 2
chr2B	19736194	19736547	TRITD2Bv1G009490.1	NBS-LRR-like resistance protein
chr2B	19736507	19739072	TRITD2Bv1G009490.2	NBS-LRR-like resistance protein
chr2B	19739478	19750756	TRITD2Bv1G009500.1	Leucine-rich repeat (LRR) family protein
chr2B	19750295	19750756	TRITD2Bv1G009500.2	NBS-LRR disease resistance protein-like protein
chr2B	19751304	19752317	TRITD2Bv1G009510.1	NBS-LRR-like resistance protein
chr2B	19794293	19795189	TRITD2Bv1G009520.1	Spore coat-associated protein N
chr2B	19794975	19795610	TRITD2Bv1G009520.2	Aspartate carbamoyltransferase
chr2B	19817676	19821797	TRITD2Bv1G009530.2	Serine/threonine-protein kinase
chr2B	19823310	19827579	TRITD2Bv1G009540.1	Transcription factor
chr2B	19877922	19878478	TRITD2Bv1G009550.1	HAT family dimerization domain containing protein, expressed
chr2B	19878654	19880516	TRITD2Bv1G009560.1	HAT transposon superfamily
chr2B	19879074	19880516	TRITD2Bv1G009560.2	HAT transposon superfamily
chr2B	19947934	19950744	TRITD2Bv1G009570.1	NBS-LRR-like resistance protein
chr2B	20038113	20044921	TRITD2Bv1G009580.2	NBS-LRR-like resistance protein
chr2B	20194569	20195324	TRITD2Bv1G009590.1	Metal transporter CNNM2
chr2B	20198203	20198589	TRITD2Bv1G009600.1	Retrotransposon protein, putative, Ty1-copia subclass
chr2B	20365639	20367042	TRITD2Bv1G009610.1	Leucine zipper-containing protein-like
chr2B	20422456	20425127	TRITD2Bv1G009620.1	Exocyst complex component, putative
chr2B	20587300	20587638	TRITD2Bv1G009670.1	Retrotransposon protein, putative, unclassified
chr2B	20862152	20862451	TRITD2Bv1G009690.1	Gag-pol polyprotein
chr2B	20863813	20864130	TRITD2Bv1G009700.1	Retrovirus-related Pol polyprotein from transposon TNT 1-94
chr2B	20870220	20870567	TRITD2Bv1G009710.1	Retrotransposon protein, putative, Ty3-gypsy subclass
chr2B	20890054	20893569	TRITD2Bv1G009730.1	Exocyst complex component, putative
chr2B	20937395	20937739	TRITD2Bv1G009750.1	30S ribosomal protein S12
chr2B	20971348	20971764	TRITD2Bv1G009760.1	Transposable element protein, putative
chr2B	20978893	20979219	TRITD2Bv1G009770.1	Retrovirus-related Pol polyprotein from transposon TNT 1-94
chr2B	21015155	21015511	TRITD2Bv1G009780.1	ERD (early-responsive to dehydration stress) family protein
chr2B	21145003	21145305	TRITD2Bv1G009790.1	Retrotransposon protein, putative, unclassified
chr2B	21234536	21234853	TRITD2Bv1G009800.1	Retrotransposon protein, putative, Ty3-gypsy subclass
chr2B	21299538	21301139	TRITD2Bv1G009820.1	zinc finger MYM-type-like protein
chr2B	21300039	21301013	TRITD2Bv1G009820.2	DNA-directed RNA polymerase subunit alpha
chr2B	21301221	21301847	TRITD2Bv1G009830.1	zinc finger MYM-type-like protein
chr2B	21322246	21322584	TRITD2Bv1G009840.1	Retrotransposon protein, putative, unclassified
chr2B	21337000	21337632	TRITD2Bv1G009850.1	Exocyst complex component, putative
chr2B	21341733	21342332	TRITD2Bv1G009860.1	Retrovirus-related Pol polyprotein from transposon TNT 1-94
chr2B	21342972	21344281	TRITD2Bv1G009870.1	Transthyretin-like S-allantoin synthase protein
chr2B	21343182	21344110	TRITD2Bv1G009870.2	Transthyretin-like S-allantoin synthase protein
chr2B	21371822	21372121	TRITD2Bv1G009900.1	tRNA 2-thiocytidine biosynthesis protein TtcA
chr2B	21374978	21375373	TRITD2Bv1G009910.1	Prenylated Rab acceptor protein 1
chr2B	21383031	21383387	TRITD2Bv1G009920.1	Retrotransposon protein, putative, Ty3-gypsy subclass
chr2B	21425587	21430020	TRITD2Bv1G009930.1	Exocyst complex component, putative
chr2B	21450901	21451230	TRITD2Bv1G009950.1	Retrotransposon protein, putative, unclassified
chr2B	21452088	21452537	TRITD2Bv1G009960.1	Retrovirus-related Pol polyprotein LINE-1
chr2B	21455156	21457765	TRITD2Bv1G009970.1	Exocyst complex component 7
chr2B	21456417	21456722	TRITD2Bv1G009980.1	NAD(P)H-quinone oxidoreductase subunit 5, chloroplastic
chr2B	21461447	21463382	TRITD2Bv1G009990.1	Exocyst complex component, putative
chr2B	21582734	21583087	TRITD2Bv1G010010.1	basic helix-loop-helix (bHLH) DNA-binding superfamily protein
chr2B	21584050	21584976	TRITD2Bv1G010020.1	Plant Tudor-like RNA-binding protein
chr2B	21587671	21591036	TRITD2Bv1G010030.1	NBS-LRR-like resistance protein
chr2B	21596042	21596362	TRITD2Bv1G010040.1	Disease resistance protein (CC-NBS-LRR class) family
chr2B	21611497	21617870	TRITD2Bv1G010050.1	Exocyst complex component, putative

## Sheet: QLrusw3B
Annotated genes within the leaf rust resistance QTL interval of Qlr.usw-3B in Saragolla
Chromosome	Start position	End position	Transcript ID	Annotation
chr3B	493746714	493747274	TRITD3Bv1G160740.1	Retrovirus-related Pol polyprotein from transposon TNT 1-94
chr3B	493994061	493995032	TRITD3Bv1G160760.1	3-isopropylmalate dehydrogenase
chr3B	494088449	494088847	TRITD3Bv1G160780.1	Retrotransposon protein, putative, Ty3-gypsy subclass
chr3B	494191606	494191995	TRITD3Bv1G160800.1	Retrotransposon protein, putative, Ty3-gypsy subclass
chr3B	494206606	494208584	TRITD3Bv1G160810.1	Protein NRT1/ PTR FAMILY 5.5
chr3B	494210958	494214521	TRITD3Bv1G160820.1	Tubby-like F-box protein
chr3B	494215254	494215603	TRITD3Bv1G160830.1	ATP synthase subunit alpha
chr3B	494218702	494222682	TRITD3Bv1G160840.2	GPN-loop GTPase
chr3B	494251261	494251635	TRITD3Bv1G160850.1	30S ribosomal protein S12
chr3B	494396425	494396763	TRITD3Bv1G160860.1	Gamma-glutamyl phosphate reductase
chr3B	494407899	494408201	TRITD3Bv1G160870.1	Transposon Ty3-I Gag-Pol polyprotein
chr3B	494408250	494408588	TRITD3Bv1G160880.1	Retrovirus-related Pol polyprotein from transposon 17.6
chr3B	494440630	494441127	TRITD3Bv1G160890.1	Transposon Ty3-I Gag-Pol polyprotein
chr3B	494531539	494531886	TRITD3Bv1G160900.1	Amino acid dehydrogenase family protein
chr3B	494531953	494532297	TRITD3Bv1G160910.1	Photosystem II reaction center protein J
chr3B	494534534	494537767	TRITD3Bv1G160920.1	Retrotransposon protein, putative, unclassified
chr3B	494561716	494571798	TRITD3Bv1G160930.8	Protein kinase, putative
chr3B	494695047	494695355	TRITD3Bv1G160940.1	Calcineurin-like metallo-phosphoesterase superfamily protein
chr3B	494834485	494835189	TRITD3Bv1G160950.1	Retrotransposon protein, putative, unclassified
chr3B	494845084	494846043	TRITD3Bv1G160960.1	Trihelix transcription factor
chr3B	494886978	494887550	TRITD3Bv1G160970.1	Transposon protein, putative, CACTA, En/Spm sub-class
chr3B	494901554	494901865	TRITD3Bv1G160980.1	Retrovirus-related Pol polyprotein from transposon TNT 1-94
chr3B	495180469	495180864	TRITD3Bv1G160990.1	Retrotransposon protein, putative, unclassified
chr3B	495195753	495196049	TRITD3Bv1G161000.1	Amidohydrolase family
chr3B	495202815	495203144	TRITD3Bv1G161010.1	Retrotransposon protein, putative, unclassified
chr3B	495327690	495328151	TRITD3Bv1G161020.1	Venom prothrombin activator oscutarin-C non-catalytic subunit
chr3B	495334284	495335066	TRITD3Bv1G161030.1	Retrovirus-related Pol polyprotein from transposon TNT 1-94
chr3B	495345422	495345895	TRITD3Bv1G161040.1	Pol polyprotein
chr3B	495352641	495353132	TRITD3Bv1G161050.1	Bifunctional protein GlmU
chr3B	495402465	495405904	TRITD3Bv1G161060.2	RING/U-box superfamily protein
chr3B	495406898	495409731	TRITD3Bv1G161070.1	ATP synthase protein I-related protein
chr3B	495427463	495427978	TRITD3Bv1G161080.1	Retrovirus-related Pol polyprotein from transposon TNT 1-94
chr3B	495457331	495457630	TRITD3Bv1G161090.1	Pol polyprotein
chr3B	495518129	495518428	TRITD3Bv1G161130.1	Phenylalanine--tRNA ligase alpha subunit
chr3B	495557207	495557527	TRITD3Bv1G161140.1	Glucose-6-phosphate 1-dehydrogenase 1
chr3B	495572080	495572985	TRITD3Bv1G161150.1	Retrotransposon protein, putative, Ty3-gypsy subclass
chr3B	495626956	495627363	TRITD3Bv1G161160.1	Pol polyprotein
chr3B	495627721	495628104	TRITD3Bv1G161170.1	Retrovirus-related Pol polyprotein from transposon opus
chr3B	495678483	495678980	TRITD3Bv1G161180.1	Retrotransposon protein, putative, unclassified
chr3B	495679742	495680467	TRITD3Bv1G161200.1	Retrotransposon protein, putative, Ty3-gypsy subclass
chr3B	495779597	495779965	TRITD3Bv1G161220.1	BHLH transcription factor
chr3B	495796993	495797298	TRITD3Bv1G161230.1	Retrovirus-related Pol polyprotein from transposon TNT 1-94
chr3B	495844306	495844605	TRITD3Bv1G161280.1	WWE protein-protein interaction domain protein family
chr3B	495882436	495954619	TRITD3Bv1G161290.1	Leucine-rich repeat receptor-like protein kinase
chr3B	495955600	495961452	TRITD3Bv1G161300.2	Phosphotransferase
chr3B	496003017	496004869	TRITD3Bv1G161330.1	IQ domain-containing protein
chr3B	496011279	496011749	TRITD3Bv1G161340.1	Gag-Pol polyprotein
chr3B	496167482	496177350	TRITD3Bv1G161370.1	F-box/RNI-like/FBD-like domains-containing protein
chr3B	496177295	496185034	TRITD3Bv1G161370.2	Acyl-CoA N-acyltransferase with RING/FYVE/PHD-type zinc finger domain-containing protein
chr3B	496276530	496283742	TRITD3Bv1G161400.5	Glutamate carboxypeptidase 2
chr3B	496280658	496281629	TRITD3Bv1G161410.1	Transposon protein, putative, Pong sub-class
chr3B	496284074	496289143	TRITD3Bv1G161420.2	Tryptophan--tRNA ligase
chr3B	496365456	496365785	TRITD3Bv1G161430.1	Proline--tRNA ligase
chr3B	496422355	496422720	TRITD3Bv1G161440.1	Histone-lysine N-methyltransferase
chr3B	496426327	496426767	TRITD3Bv1G161450.1	Phospho-N-acetylmuramoyl-pentapeptide-transferase
chr3B	496539878	496540372	TRITD3Bv1G161460.1	UDP-N-acetylmuramate--L-alanine ligase
chr3B	496599672	496600007	TRITD3Bv1G161470.1	Retrovirus-related Pol polyprotein from transposon TNT 1-94
chr3B	496623423	496627500	TRITD3Bv1G161480.2	Malic enzyme
chr3B	496628220	496628624	TRITD3Bv1G161490.1	DNA-directed RNA polymerase subunit beta'
chr3B	496628256	496633249	TRITD3Bv1G161500.2	Lon protease
chr3B	496737423	496737791	TRITD3Bv1G161530.1	Target SNARE coiled-coil domain protein
chr3B	496754148	496754456	TRITD3Bv1G161540.1	Methionyl-tRNA formyltransferase
chr3B	496771902	496772255	TRITD3Bv1G161550.1	Serine/threonine protein kinase 8
chr3B	496814176	496815237	TRITD3Bv1G161560.1	Transposon Ty3-I Gag-Pol polyprotein
chr3B	496839570	496839887	TRITD3Bv1G161570.1	ATPase E1-E2 type family protein / haloacid dehalogenase-like hydrolase family protein
chr3B	496861681	496863509	TRITD3Bv1G161580.1	Histidine phosphotransfer protein
chr3B	496873325	496874194	TRITD3Bv1G161590.1	Retrovirus-related Pol polyprotein from transposon TNT 1-94
chr3B	496895484	496896035	TRITD3Bv1G161600.1	Endonuclease/exonuclease/phosphatase family protein
chr3B	496896267	496896740	TRITD3Bv1G161610.1	Transposon TX1 uncharacterized
chr3B	496969170	496969895	TRITD3Bv1G161660.1	Retrotransposon protein, putative, Ty3-gypsy subclass
chr3B	497152610	497152993	TRITD3Bv1G161690.1	Retrovirus-related Pol polyprotein from transposon opus
chr3B	497178889	497179191	TRITD3Bv1G161700.1	Retrotransposon protein, putative, Ty3-gypsy subclass
chr3B	497193041	497199920	TRITD3Bv1G161710.6	Kinesin-like protein
chr3B	497204888	497205238	TRITD3Bv1G161720.1	Pol polyprotein
chr3B	497206277	497206870	TRITD3Bv1G161730.1	Retrovirus-related Pol polyprotein from transposon TNT 1-94
chr3B	497209205	497210519	TRITD3Bv1G161740.1	2-oxoglutarate (2OG) and Fe(II)-dependent oxygenase superfamily protein, putative
chr3B	497212058	497216922	TRITD3Bv1G161750.6	Protein kinase family protein
chr3B	497258410	497262049	TRITD3Bv1G161760.1	Half-size ABC transporter, membrane protein
chr3B	497382622	497383008	TRITD3Bv1G161770.1	uvrB/uvrC motif-containing protein
chr3B	497412127	497418322	TRITD3Bv1G161780.2	Golgin candidate 1
chr3B	497423051	497430902	TRITD3Bv1G161790.1	Acyl-CoA N-acyltransferase with RING/FYVE/PHD-type zinc finger domain-containing protein
chr3B	497442858	497443955	TRITD3Bv1G161800.1	Retrotransposon protein, putative, Ty3-gypsy subclass
chr3B	497474437	497474853	TRITD3Bv1G161810.1	SKP1-like protein
chr3B	497480115	497480498	TRITD3Bv1G161820.1	Retrovirus-related Pol polyprotein from transposon TNT 1-94
chr3B	497487406	497488276	TRITD3Bv1G161830.1	Protein FAR1-RELATED SEQUENCE 5
chr3B	497495528	497503542	TRITD3Bv1G161840.1	myosin XI D
chr3B	497615419	497615739	TRITD3Bv1G161860.1	DNA-directed RNA polymerase subunit beta'
chr3B	497685834	497686415	TRITD3Bv1G161880.1	Transposon Ty3-I Gag-Pol polyprotein
chr3B	497699495	497701144	TRITD3Bv1G161890.1	GATA transcription factor
chr3B	497844714	497845070	TRITD3Bv1G161930.1	Retrotransposon protein, putative, Ty3-gypsy subclass
chr3B	497905191	497905583	TRITD3Bv1G161940.1	Transposon Ty3-I Gag-Pol polyprotein
chr3B	497938222	497938626	TRITD3Bv1G161950.1	Transposon protein, putative, CACTA, En/Spm sub-class
chr3B	497959216	497959560	TRITD3Bv1G161960.1	30S ribosomal protein S12
chr3B	497960907	497961638	TRITD3Bv1G161970.1	Phosphonates import ATP-binding protein PhnC 2
chr3B	498114540	498114911	TRITD3Bv1G161980.1	Major heat shock 70 kDa protein Ba
chr3B	498117826	498118176	TRITD3Bv1G161990.1	Gap junction alpha-1 protein
chr3B	498125727	498126146	TRITD3Bv1G162000.1	Retrovirus-related Pol polyprotein from transposon gypsy
chr3B	498142241	498142663	TRITD3Bv1G162010.1	DNA-(apurinic or apyrimidinic site) lyase
chr3B	498142344	498146255	TRITD3Bv1G162010.2	Gag-pol polyprotein
chr3B	498152511	498154137	TRITD3Bv1G162020.1	Sugar transporter, putative
chr3B	498168773	498169102	TRITD3Bv1G162030.1	Retrovirus-related Pol polyprotein from transposon opus
chr3B	498170129	498170551	TRITD3Bv1G162040.1	Pol polyprotein
chr3B	498229698	498230294	TRITD3Bv1G162050.1	Retrotransposon, putative, centromere-specific
chr3B	498256668	498257206	TRITD3Bv1G162070.1	nucleoporin
chr3B	498256712	498257191	TRITD3Bv1G162070.2	18S pre-ribosomal assembly protein gar2-like protein
chr3B	498393567	498394010	TRITD3Bv1G162080.1	Retrovirus-related Pol polyprotein from transposon TNT 1-94
chr3B	498449717	498450037	TRITD3Bv1G162090.1	Gag-pol polyprotein
chr3B	498451253	498452317	TRITD3Bv1G162100.1	Retrovirus-related Pol polyprotein from transposon TNT 1-94
chr3B	498479786	498480487	TRITD3Bv1G162110.1	ADP-ribosylation factor B1C
chr3B	498500047	498500367	TRITD3Bv1G162120.1	Mannose-binding lectin superfamily protein
chr3B	498582579	498582911	TRITD3Bv1G162130.1	Phosphatidylinositol-4-phosphate 5-kinase 2
chr3B	498635671	498636069	TRITD3Bv1G162160.1	RNA-binding protein 34
chr3B	498637045	498637410	TRITD3Bv1G162170.1	Retrotransposon protein, putative, unclassified
chr3B	498638070	498638459	TRITD3Bv1G162180.1	ATP-dependent RNA helicase RhlB
chr3B	498640186	498640842	TRITD3Bv1G162190.1	ATP-dependent RNA helicase SUB2
chr3B	498644303	498644680	TRITD3Bv1G162200.1	RING/U-box superfamily protein
chr3B	498650627	498651166	TRITD3Bv1G162210.1	Leucine-rich repeat transmembrane protein kinase protein
chr3B	498654997	498655563	TRITD3Bv1G162220.1	P-loop containing nucleoside triphosphate hydrolases superfamily protein
chr3B	498657460	498657834	TRITD3Bv1G162230.1	nuclear matrix protein-like protein
chr3B	498657558	498657932	TRITD3Bv1G162230.2	Proton pump-interactor 1
chr3B	498659784	498660431	TRITD3Bv1G162240.1	Myosin family protein with Dil domain-containing protein
chr3B	498665824	498666141	TRITD3Bv1G162250.1	Retrotransposon protein, putative, unclassified
chr3B	498751140	498752999	TRITD3Bv1G162260.1	Nuclear pore complex protein NUP35
chr3B	498766256	498766669	TRITD3Bv1G162270.1	Transposon Ty3-I Gag-Pol polyprotein
chr3B	498769028	498769426	TRITD3Bv1G162280.1	Transcription regulators,zinc ion binding, putative isoform 2
chr3B	498792477	498792944	TRITD3Bv1G162310.1	Retrotransposon protein, putative, unclassified
chr3B	498807353	498807760	TRITD3Bv1G162320.1	Exodeoxyribonuclease 7 large subunit
chr3B	498849672	498850889	TRITD3Bv1G162340.1	Pol polyprotein
chr3B	498857467	498857928	TRITD3Bv1G162350.1	Retrovirus-related Pol polyprotein from transposon opus
chr3B	499028102	499029580	TRITD3Bv1G162380.1	Retrovirus-related Pol polyprotein from transposon TNT 1-94
chr3B	499035143	499035454	TRITD3Bv1G162390.1	Retrotransposon protein, putative, Ty3-gypsy subclass
chr3B	499050659	499058976	TRITD3Bv1G162400.1	Nuclear pore complex protein NUP85
chr3B	499060383	499073316	TRITD3Bv1G162410.7	Dolichyl-diphosphooligosaccharide--protein glycosyltransferase subunit STT3A
chr3B	499107575	499108264	TRITD3Bv1G162420.1	Retrovirus-related Pol polyprotein from transposon TNT 1-94
chr3B	499114221	499114874	TRITD3Bv1G162430.1	Retrotransposon protein, putative, Ty1-copia subclass
chr3B	499271511	499273952	TRITD3Bv1G162480.1	zinc finger MYM-type-like protein
chr3B	499300200	499300962	TRITD3Bv1G162490.1	E3 ubiquitin-protein ligase UPL3
chr3B	499387664	499391037	TRITD3Bv1G162500.1	Chaperone clpb, putative
chr3B	499423853	499425692	TRITD3Bv1G162510.2	Carotenoid cleavage dioxygenase
chr3B	499470311	499470631	TRITD3Bv1G162520.1	Acetyl-coenzyme A carboxylase carboxyl transferase subunit beta, chloroplastic
chr3B	499528884	499529189	TRITD3Bv1G162530.1	Cupredoxin superfamily protein
chr3B	499600897	499601232	TRITD3Bv1G162540.1	Ribonucleoside-diphosphate reductase large subunit-like protein
chr3B	499748301	499748732	TRITD3Bv1G162550.1	Retrovirus-related Pol polyprotein from transposon TNT 1-94
chr3B	499769386	499770237	TRITD3Bv1G162570.1	Retrotransposon protein, putative, Ty3-gypsy subclass
chr3B	499811221	499811787	TRITD3Bv1G162580.1	Retrovirus-related Pol polyprotein from transposon opus
chr3B	499915850	499917760	TRITD3Bv1G162600.1	Mannan endo-1,4-beta-mannosidase-like protein
chr3B	499977962	499978267	TRITD3Bv1G162630.1	Retrotransposon protein, putative, Ty3-gypsy subclass
chr3B	500071023	500072054	TRITD3Bv1G162670.1	Retrotransposon protein, putative, Ty3-gypsy subclass
chr3B	500168209	500169823	TRITD3Bv1G162680.1	Transcriptional regulator MntR
chr3B	500173964	500174422	TRITD3Bv1G162690.1	ATPase E1-E2 type family protein / haloacid dehalogenase-like hydrolase family protein
chr3B	500259143	500259460	TRITD3Bv1G162700.1	Gag polyprotein
chr3B	500263321	500263701	TRITD3Bv1G162710.1	Retrotransposon protein, putative, Ty1-copia subclass
chr3B	500375608	500377255	TRITD3Bv1G162720.1	DUF506 family protein
chr3B	500376952	500377293	TRITD3Bv1G162730.1	related to AP2.7
chr3B	500379698	500382328	TRITD3Bv1G162740.2	Protein kinase
chr3B	500380725	500381027	TRITD3Bv1G162750.1	lysine-ketoglutarate reductase/saccharopine dehydrogenase bifunctional enzyme
chr3B	500396751	500397515	TRITD3Bv1G162760.1	Retrotransposon protein, putative, Ty3-gypsy subclass
chr3B	500426992	500427519	TRITD3Bv1G162770.1	Pol polyprotein
chr3B	500551467	500551892	TRITD3Bv1G162780.1	Retrovirus-related Pol polyprotein from transposon TNT 1-94
chr3B	500651388	500651762	TRITD3Bv1G162790.1	Gag-Pol polyprotein
chr3B	500652368	500652799	TRITD3Bv1G162800.1	Retrovirus-related Pol polyprotein from transposon 17.6
chr3B	500653361	500653915	TRITD3Bv1G162810.1	Pol polyprotein
chr3B	500758273	500758572	TRITD3Bv1G162860.1	TSA: Wollemia nobilis Ref_Wollemi_Transcript_14117_1818 transcribed RNA sequence
chr3B	500772631	500772927	TRITD3Bv1G162870.1	Retrotransposon protein, putative, Ty3-gypsy subclass
chr3B	500789195	500789506	TRITD3Bv1G162880.1	Gag-Pol polyprotein
chr3B	500814573	500818972	TRITD3Bv1G162890.1	Dihydroorotase
chr3B	500819891	500821060	TRITD3Bv1G162900.1	Pentatricopeptide repeat-containing protein, putative
chr3B	500821237	500824640	TRITD3Bv1G162910.3	RNA-binding S4 domain-containing protein
chr3B	500851280	500851597	TRITD3Bv1G162920.1	Poly [adp-ribose] polymerase 3
chr3B	500870694	500871134	TRITD3Bv1G162930.1	Pol polyprotein
chr3B	500878437	500879162	TRITD3Bv1G162940.1	VQ motif-containing protein
chr3B	500891025	500892603	TRITD3Bv1G162950.1	Transposon protein, putative, CACTA, En/Spm sub-class
chr3B	500897679	500898017	TRITD3Bv1G162990.1	Retrotransposon protein, putative, Ty1-copia subclass
chr3B	500914522	500914881	TRITD3Bv1G163000.1	GMP synthase [glutamine-hydrolyzing]
chr3B	500920595	500920981	TRITD3Bv1G163010.1	Retrotransposon protein, putative, Ty3-gypsy subclass
chr3B	500927515	500928075	TRITD3Bv1G163020.1	Retrovirus-related Pol polyprotein from transposon opus
chr3B	500946769	500947299	TRITD3Bv1G163030.1	Retrotransposon protein, putative, Ty3-gypsy subclass
chr3B	501005900	501006235	TRITD3Bv1G163050.1	Casein kinase 1-like protein 8
chr3B	501018843	501019322	TRITD3Bv1G163060.1	Gag/pol polyprotein
chr3B	501211211	501211570	TRITD3Bv1G163070.1	Receptor-like protein kinase HSL1
chr3B	501217254	501291126	TRITD3Bv1G163080.1	Transposon protein, putative, CACTA, En/Spm sub-class, expressed
chr3B	501290530	501291126	TRITD3Bv1G163080.4	RNA-dependent RNA polymerase 6
chr3B	501292319	501292724	TRITD3Bv1G163090.1	RNA-binding (RRM/RBD/RNP motifs) family protein
chr3B	501292319	501292845	TRITD3Bv1G163090.2	SNF2 domain-containing protein / helicase domain-containing protein / zinc finger protein-like protein
chr3B	501293091	501293576	TRITD3Bv1G163100.1	Transposon protein, putative, CACTA, En/Spm sub-class
chr3B	501305695	501306093	TRITD3Bv1G163140.1	Transcription regulators,zinc ion binding, putative isoform 2
chr3B	501319384	501319878	TRITD3Bv1G163150.1	zinc ion binding/nucleic acid binding protein
chr3B	501329556	501333596	TRITD3Bv1G163160.2	Dynamin-like
chr3B	501372618	501376655	TRITD3Bv1G163170.3	Homeobox protein
chr3B	501409795	501410235	TRITD3Bv1G163180.1	U-box domain-containing protein 52
chr3B	501416571	501416930	TRITD3Bv1G163190.1	Gag-Pol polyprotein
chr3B	501416940	501417344	TRITD3Bv1G163200.1	Retrovirus-related Pol polyprotein from transposon TNT 1-94
chr3B	501418050	501418631	TRITD3Bv1G163210.1	Glycine--tRNA ligase alpha subunit
chr3B	501431325	501431657	TRITD3Bv1G163220.1	Retrotransposon protein, putative, unclassified
chr3B	501443594	501444055	TRITD3Bv1G163230.1	Pol polyprotein
chr3B	501449420	501449902	TRITD3Bv1G163240.1	Retrovirus-related Pol polyprotein from transposon opus
chr3B	501721428	501722118	TRITD3Bv1G163260.1	Early nodulin-like protein
chr3B	501723819	501724184	TRITD3Bv1G163270.1	P-loop containing nucleoside triphosphate hydrolases superfamily protein
chr3B	501726379	501727497	TRITD3Bv1G163280.1	secretion-regulating guanine nucleotide exchange factor
chr3B	501734337	501735900	TRITD3Bv1G163290.1	Cyclic nucleotide-gated ion channel, putative
chr3B	501736239	501736574	TRITD3Bv1G163300.1	Mitochondrial transcription termination factor family protein
chr3B	501806369	501806968	TRITD3Bv1G163350.1	Arf-GAP with GTPase, ANK repeat and PH domain-containing protein 4
chr3B	501845115	501845435	TRITD3Bv1G163370.1	Formate--tetrahydrofolate ligase
chr3B	501885749	501887794	TRITD3Bv1G163380.3	GDSL esterase/lipase
chr3B	501921639	501922175	TRITD3Bv1G163390.1	Retrovirus-related Pol polyprotein from transposon TNT 1-94
chr3B	501927721	501931414	TRITD3Bv1G163400.1	Protein kinase, putative
chr3B	502066894	502067397	TRITD3Bv1G163440.1	Retrotransposon protein, putative, Ty3-gypsy subclass
chr3B	502132283	502132660	TRITD3Bv1G163450.1	Ribosomal RNA apurinic site specific lyase-like
chr3B	502155197	502155583	TRITD3Bv1G163460.1	50S ribosomal protein L18
chr3B	502172481	502172915	TRITD3Bv1G163470.1	Retrotransposon protein, putative, Ty3-gypsy subclass, expressed
chr3B	502262933	502263238	TRITD3Bv1G163510.1	RNA-directed DNA polymerase (Reverse transcriptase)
chr3B	502285928	502298528	TRITD3Bv1G163520.2	Pleiotropic drug resistance ABC transporter
chr3B	502301252	502302084	TRITD3Bv1G163530.1	Oil body-associated protein 2A
chr3B	502310371	502311234	TRITD3Bv1G163540.1	Retrovirus-related Pol polyprotein from transposon TNT 1-94
chr3B	502379697	502380623	TRITD3Bv1G163550.2	E3 ubiquitin-protein ligase KEG
chr3B	502379697	502381057	TRITD3Bv1G163550.3	Protein kinase, putative
chr3B	502379955	502380372	TRITD3Bv1G163550.4	Protein kinase, putative
chr3B	502382858	502385542	TRITD3Bv1G163560.1	Nitrate transporter 1.2
chr3B	502383201	502383392	TRITD3Bv1G163570.1	Proline--tRNA ligase
chr3B	502391217	502396692	TRITD3Bv1G163580.3	MACPF domain protein
chr3B	502415765	502416067	TRITD3Bv1G163590.1	Autonomous transposable element EN-1 mosaic protein
chr3B	502515542	502515964	TRITD3Bv1G163600.1	Gag-Pol polyprotein
chr3B	502516352	502516999	TRITD3Bv1G163610.1	UDP-glucosyl transferase 85A2
chr3B	502538864	502539193	TRITD3Bv1G163640.1	9-cis-epoxycarotenoid dioxygenase NCED2, chloroplastic
chr3B	502578313	502578744	TRITD3Bv1G163650.1	30S ribosomal protein S12
chr3B	502580290	502580634	TRITD3Bv1G163660.1	Coatomer subunit beta'
chr3B	502593247	502593783	TRITD3Bv1G163670.1	Retrovirus-related Pol polyprotein from transposon 17.6
chr3B	502594211	502594570	TRITD3Bv1G163680.1	Pol polyprotein
chr3B	502630267	502630845	TRITD3Bv1G163690.1	Antitoxin VapB1
chr3B	502642676	502643101	TRITD3Bv1G163700.1	Retrotransposon protein, putative, Ty3-gypsy subclass
chr3B	502645013	502645375	TRITD3Bv1G163710.1	Cyclophilin-like peptidyl-prolyl cis-trans isomerase family protein
chr3B	502654769	502655488	TRITD3Bv1G163720.1	P-loop containing nucleoside triphosphate hydrolases superfamily protein
chr3B	502654769	502655610	TRITD3Bv1G163720.2	ureide permease 1
chr3B	502654769	502657400	TRITD3Bv1G163720.3	zinc finger CCCH domain-containing protein 44
chr3B	502654769	502657657	TRITD3Bv1G163720.4	Cyclin-dependent kinase inhibitor 5
chr3B	502654959	502655488	TRITD3Bv1G163720.5	Integrin alpha-1
chr3B	502654959	502655610	TRITD3Bv1G163720.6	Sodium- and chloride-dependent taurine transporter
chr3B	502654959	502655610	TRITD3Bv1G163720.7	Ribosomal protein S12 methylthiotransferase RimO
chr3B	502654959	502657583	TRITD3Bv1G163720.8	Glutamate racemase
chr3B	502654959	502657657	TRITD3Bv1G163720.9	zinc finger CCCH domain-containing protein 44
chr3B	502655056	502657583	TRITD3Bv1G163720.10	Eukaryotic translation initiation factor 2 subunit 2
chr3B	502655288	502657583	TRITD3Bv1G163720.11	serine/arginine-rich splicing factor-like protein, putative
chr3B	502655601	502657657	TRITD3Bv1G163720.12	THAP domain-containing protein 1
chr3B	502658824	502660458	TRITD3Bv1G163730.1	4-hydroxy-tetrahydrodipicolinate synthase
chr3B	502888436	502889146	TRITD3Bv1G163740.1	branched-chain amino acid transaminase 1
chr3B	502926831	502929276	TRITD3Bv1G163750.5	transmembrane protein (DUF616)
chr3B	502941832	502943632	TRITD3Bv1G163760.1	50S ribosomal protein L13
chr3B	502945802	502946395	TRITD3Bv1G163770.1	Anthocyanin 3'-O-beta-glucosyltransferase
chr3B	502961667	502962041	TRITD3Bv1G163780.1	3'-5'-exoribonuclease family protein
chr3B	503096160	503104778	TRITD3Bv1G163820.1	Poly(A) polymerase
chr3B	503096510	503096899	TRITD3Bv1G163830.1	Transducin/WD40 repeat-like superfamily protein
chr3B	503097610	503099388	TRITD3Bv1G163840.1	Retrotransposon protein, putative, unclassified
chr3B	503098241	503098678	TRITD3Bv1G163840.2	4-deoxy-L-threo-5-hexosulose-uronate ketol-isomerase
chr3B	503101699	503102055	TRITD3Bv1G163850.1	S-adenosyl-L-methionine-dependent methyltransferases superfamily protein
chr3B	503106184	503108221	TRITD3Bv1G163860.1	Structural constituent of cell wall, putative
chr3B	503107854	503108240	TRITD3Bv1G163870.1	DNA-directed RNA polymerase subunit
chr3B	503127399	503127992	TRITD3Bv1G163880.1	Transposable element protein, putative, Retrotrans_gag
chr3B	503143831	503144130	TRITD3Bv1G163890.1	Retrovirus-related Pol polyprotein from transposon TNT 1-94
chr3B	503159136	503159729	TRITD3Bv1G163910.1	Transposon Ty3-I Gag-Pol polyprotein
chr3B	503194267	503194587	TRITD3Bv1G163920.1	Reverse transcriptase
chr3B	503260523	503260927	TRITD3Bv1G163930.1	Retrotransposon protein, putative, Ty3-gypsy subclass
chr3B	503370510	503371352	TRITD3Bv1G163950.1	Protein-tyrosine kinase 2-beta
chr3B	503513181	503513516	TRITD3Bv1G163960.1	Cadherin EGF LAG seven-pass G-type receptor 2
chr3B	503548296	503549159	TRITD3Bv1G163970.1	Retrotransposon protein, putative, unclassified
chr3B	503568468	503569031	TRITD3Bv1G164010.1	structural maintenance of chromosomes 6A
chr3B	503593727	503594026	TRITD3Bv1G164020.1	meristematic receptor-like kinase
chr3B	503605534	503606100	TRITD3Bv1G164060.1	HTH-type transcriptional repressor NsrR
chr3B	503608888	503609265	TRITD3Bv1G164070.1	Retrotransposon protein, putative, Ty3-gypsy subclass
chr3B	503625352	503625828	TRITD3Bv1G164100.1	Retrotransposon protein, putative, unclassified
chr3B	503625774	503626679	TRITD3Bv1G164100.2	Ribosomal protein L36
chr3B	503627140	503627538	TRITD3Bv1G164110.1	maternal effect embryo arrest 18
chr3B	503630484	503636335	TRITD3Bv1G164120.1	Katanin p60 ATPase-containing subunit, putative
chr3B	503637945	503640739	TRITD3Bv1G164130.1	Ubiquitin-conjugating enzyme E2
chr3B	503652512	503654055	TRITD3Bv1G164140.1	Beta-1,3-galactosyl-O-glycosyl-glycoprotein beta-1,6-N-acetylglucosaminyltransferase
chr3B	503672035	503672460	TRITD3Bv1G164150.1	Transposable element protein, putative
chr3B	503682458	503682760	TRITD3Bv1G164160.1	RGA-7B
chr3B	503689158	503690504	TRITD3Bv1G164170.1	Phosphotransferase
chr3B	503751730	503754920	TRITD3Bv1G164180.1	Receptor-like protein kinase
chr3B	503956556	503957626	TRITD3Bv1G164190.1	Leucine-rich repeat receptor-like protein kinase
chr3B	503991880	503992203	TRITD3Bv1G164200.1	Transposable element protein, putative, Retrotrans_gag
chr3B	504025779	504026099	TRITD3Bv1G164240.1	Reverse transcriptase
chr3B	504026724	504027038	TRITD3Bv1G164250.1	Retrovirus-related Pol polyprotein from transposon TNT 1-94
chr3B	504078371	504079501	TRITD3Bv1G164260.1	Retrovirus-related Pol polyprotein LINE-1
chr3B	504079288	504079680	TRITD3Bv1G164260.2	RNA-directed DNA polymerase
chr3B	504100796	504101262	TRITD3Bv1G164280.1	F-box family protein
chr3B	504101135	504102398	TRITD3Bv1G164280.4	F-box/RNI-like/FBD-like domains-containing protein
chr3B	504104878	504105189	TRITD3Bv1G164290.1	Disease resistance protein (CC-NBS-LRR class) family
chr3B	504105637	504105831	TRITD3Bv1G164300.1	Powdery mildew resistance protein Pm3
chr3B	504131264	504131671	TRITD3Bv1G164310.1	Retrovirus-related Pol polyprotein from transposon TNT 1-94
chr3B	504135738	504136040	TRITD3Bv1G164320.1	Acyl-[acyl-carrier-protein]--UDP-N-acetylglucosamine O-acyltransferase
chr3B	504136874	504137950	TRITD3Bv1G164330.1	6-phosphogluconate dehydrogenase family protein
chr3B	504208940	504211224	TRITD3Bv1G164340.4	rRNA methyltransferase
chr3B	504218682	504220653	TRITD3Bv1G164350.3	Auxin-responsive protein
chr3B	504232716	504233909	TRITD3Bv1G164360.1	B3 domain-containing protein family
chr3B	504238236	504238718	TRITD3Bv1G164370.1	General transcription factor II-I repeat domain-containing protein 2
chr3B	504266212	504266598	TRITD3Bv1G164380.1	Pol polyprotein
chr3B	504275689	504276036	TRITD3Bv1G164390.1	Retrovirus-related Pol polyprotein from transposon opus
chr3B	504277022	504277318	TRITD3Bv1G164400.1	Pol polyprotein
chr3B	504284941	504285459	TRITD3Bv1G164410.1	Retrovirus-related Pol polyprotein from transposon TNT 1-94
chr3B	504371555	504376263	TRITD3Bv1G164420.1	Receptor protein kinase, putative
chr3B	504470048	504473516	TRITD3Bv1G164450.1	Glutamate carboxypeptidase 2
chr3B	504638518	504638898	TRITD3Bv1G164490.1	Retrotransposon protein, putative, unclassified
chr3B	504651025	504655218	TRITD3Bv1G164510.1	Glutamate carboxypeptidase 2
chr3B	504662996	504666474	TRITD3Bv1G164520.1	DUF1005 family protein (DUF1005)
chr3B	504723511	504723834	TRITD3Bv1G164550.1	Reverse transcriptase
chr3B	504797273	504797809	TRITD3Bv1G164560.1	Transposon protein, putative, Mutator sub-class
chr3B	504840976	504841571	TRITD3Bv1G164580.2	Profilin
chr3B	504843315	504846209	TRITD3Bv1G164590.1	Glucan endo-1,3-beta-glucosidase, putative
chr3B	504932083	504932394	TRITD3Bv1G164600.1	Major facilitator superfamily protein
chr3B	504952754	504953164	TRITD3Bv1G164610.1	Transposable element protein, putative, Retrotrans_gag
chr3B	504972294	504972635	TRITD3Bv1G164620.1	Transposon protein, putative, Mariner sub-class
chr3B	504974591	504974842	TRITD3Bv1G164640.1	U-box domain-containing protein kinase family protein
chr3B	505060630	505061118	TRITD3Bv1G164660.1	tRNA N6-adenosine threonylcarbamoyltransferase
chr3B	505189559	505189942	TRITD3Bv1G164670.1	Inhibitor of nuclear factor kappa-B kinase subunit beta
chr3B	505233596	505234021	TRITD3Bv1G164680.1	Retrotransposon protein, putative, Ty3-gypsy subclass
chr3B	505256638	505257012	TRITD3Bv1G164700.1	Dihydroxy-acid dehydratase
chr3B	505358929	505359565	TRITD3Bv1G164720.1	DNA mismatch repair protein MutL
chr3B	505572529	505572864	TRITD3Bv1G164730.1	UvrABC system protein A
chr3B	505600100	505601047	TRITD3Bv1G164740.1	Oxidative stress 3, putative isoform 1
chr3B	505601702	505607771	TRITD3Bv1G164750.3	Endoribonuclease YbeY
chr3B	505873171	505873470	TRITD3Bv1G164770.1	kinetochore protein
chr3B	505879351	505879650	TRITD3Bv1G164780.1	Regulator of Vps4 activity in the MVB pathway protein
chr3B	506009615	506009968	TRITD3Bv1G164830.1	Retrotransposon protein, putative, Ty1-copia subclass
chr3B	506023299	506024348	TRITD3Bv1G164840.1	Retrovirus-related Pol polyprotein from transposon TNT 1-94
chr3B	506068730	506069038	TRITD3Bv1G164850.1	40S ribosomal protein S0
chr3B	506143035	506143337	TRITD3Bv1G164880.1	Retrotransposon protein, putative, Ty3-gypsy subclass
chr3B	506198492	506201829	TRITD3Bv1G164900.2	Dual specificity protein phosphatase family protein
chr3B	506204903	506210520	TRITD3Bv1G164910.6	Mitochondrial-processing peptidase subunit alpha
chr3B	506213657	506220230	TRITD3Bv1G164920.2	ATP-dependent 6-phosphofructokinase
chr3B	506220288	506220671	TRITD3Bv1G164930.1	ATP-dependent 6-phosphofructokinase
chr3B	506334379	506334972	TRITD3Bv1G164940.1	Pol polyprotein
chr3B	506466012	506469943	TRITD3Bv1G164950.2	Clathrin interactor EPSIN-like protein
chr3B	506470296	506473169	TRITD3Bv1G164960.1	Serine/threonine protein phosphatase 7 long form isogeny
chr3B	506477198	506477509	TRITD3Bv1G164970.1	Transposon protein, putative, Pong sub-class
chr3B	506481453	506481824	TRITD3Bv1G164980.1	Insulin-like growth factor II
chr3B	506496601	506500786	TRITD3Bv1G164990.3	8-amino-7-oxononanoate synthase
chr3B	506509589	506510194	TRITD3Bv1G165000.1	Retrotransposon protein, putative, unclassified
chr3B	506565328	506568764	TRITD3Bv1G165020.2	Receptor-like kinase
chr3B	506589262	506589594	TRITD3Bv1G165030.1	Gag polyprotein
chr3B	506604235	506604588	TRITD3Bv1G165040.1	Transposon Ty3-I Gag-Pol polyprotein
chr3B	506722429	506723031	TRITD3Bv1G165070.1	Retrotransposon protein, putative, Ty3-gypsy subclass
chr3B	506738616	506738915	TRITD3Bv1G165080.1	UvrB/UvrC domain protein (DUF3506)
chr3B	506829906	506830406	TRITD3Bv1G165110.1	BED zinc finger,hAT family dimerization domain, putative
chr3B	506836363	506836749	TRITD3Bv1G165120.1	Transposon protein, putative, CACTA, En/Spm sub-class
chr3B	506941341	506941673	TRITD3Bv1G165130.1	Retrotransposon protein, putative, unclassified
chr3B	506961971	506962471	TRITD3Bv1G165140.1	Transposable element protein, putative, Retrotrans_gag
chr3B	506964406	506965182	TRITD3Bv1G165150.1	Retrovirus-related Pol polyprotein from transposon opus
chr3B	506979382	506979900	TRITD3Bv1G165160.1	aluminum-activated, malate transporter 12
chr3B	507013836	507021417	TRITD3Bv1G165170.1	Ubiquitin-like-specific protease 1D
chr3B	507021418	507021717	TRITD3Bv1G165180.1	ephrin type-B receptor
chr3B	507023421	507025175	TRITD3Bv1G165190.1	nuclear fusion defective 6
chr3B	507085651	507085968	TRITD3Bv1G165220.1	evolutionarily conserved C-terminal region 5
chr3B	507096913	507097258	TRITD3Bv1G165230.1	Glutamate racemase
chr3B	507208992	507209711	TRITD3Bv1G165280.1	Interleukin-12 receptor subunit beta-2
chr3B	507351922	507352476	TRITD3Bv1G165290.1	Retrovirus-related Pol polyprotein from transposon TNT 1-94
chr3B	507380665	507380976	TRITD3Bv1G165300.1	phytochrome interacting factor 4
chr3B	507415818	507416447	TRITD3Bv1G165320.1	Gag-Pol polyprotein
chr3B	507510822	507511139	TRITD3Bv1G165350.1	Isoamyl acetate-hydrolyzing esterase 1 homolog
chr3B	507528980	507529372	TRITD3Bv1G165360.1	Retrotransposon protein, putative, Ty3-gypsy subclass
chr3B	507560630	507561055	TRITD3Bv1G165370.1	Inhibitor of nuclear factor kappa-B kinase subunit beta
chr3B	507633672	507634013	TRITD3Bv1G165380.1	Transposon Ty3-I Gag-Pol polyprotein
chr3B	507645731	507649153	TRITD3Bv1G165390.2	Pentatricopeptide repeat-containing protein
chr3B	507649193	507654244	TRITD3Bv1G165400.3	Farnesyl-protein transferase beta subunit
chr3B	507655904	507656530	TRITD3Bv1G165410.1	Werner Syndrome-like exonuclease
chr3B	507719078	507719455	TRITD3Bv1G165420.1	Pentatricopeptide repeat (PPR) superfamily protein
chr3B	507811770	507812483	TRITD3Bv1G165440.1	Synaptotagmin-7
chr3B	507814296	507821318	TRITD3Bv1G165450.1	Poly [ADP-ribose] polymerase
chr3B	507825557	507826090	TRITD3Bv1G165460.1	Retrotransposon protein, putative, Ty3-gypsy subclass
chr3B	507839561	507840130	TRITD3Bv1G165480.1	Sorting nexin-1
chr3B	507840297	507840698	TRITD3Bv1G165490.1	Retrotransposon protein, putative, Ty1-copia subclass
chr3B	507840717	507841220	TRITD3Bv1G165500.1	Pumilio-like protein 1
chr3B	507930280	507931865	TRITD3Bv1G165520.1	Reticulon-like protein
chr3B	507938894	507939202	TRITD3Bv1G165530.1	autoinhibited Ca(2+)-ATPase, isoform 4
chr3B	507940021	507940443	TRITD3Bv1G165540.1	PH domain leucine-rich repeat protein phosphatase 1
chr3B	507941008	507941901	TRITD3Bv1G165550.1	Retrotransposon protein, putative, unclassified
chr3B	508043061	508043624	TRITD3Bv1G165570.1	Ethylene-responsive transcription factor
chr3B	508091534	508091857	TRITD3Bv1G165620.1	nuclear pore complex protein (DUF3414)
chr3B	508111465	508111815	TRITD3Bv1G165630.1	Retrovirus-related Pol polyprotein from transposon 17.6
chr3B	508182925	508183434	TRITD3Bv1G165640.1	kinase family with ARM repeat domain-containing protein
chr3B	508207994	508208761	TRITD3Bv1G165650.1	Transposon Ty3-I Gag-Pol polyprotein
chr3B	508269905	508270531	TRITD3Bv1G165660.1	Retrovirus-related Pol polyprotein from transposon TNT 1-94
chr3B	508403026	508403421	TRITD3Bv1G165670.1	Retrotransposon protein, putative, Ty3-gypsy subclass
chr3B	508462101	508462424	TRITD3Bv1G165680.1	Apocytochrome f
chr3B	508468641	508469054	TRITD3Bv1G165690.1	GMP synthase [glutamine-hydrolyzing]
chr3B	508471820	508472200	TRITD3Bv1G165700.1	Retrovirus-related Pol polyprotein from transposon 17.6
chr3B	508489372	508489821	TRITD3Bv1G165720.1	Transducin/WD40 repeat-like superfamily protein
chr3B	508517975	508518301	TRITD3Bv1G165730.1	Retrotransposon protein, putative, Ty3-gypsy subclass
chr3B	508603964	508604728	TRITD3Bv1G165770.1	Late embryogenesis abundant hydroxyproline-rich glycoprotein family, putative
chr3B	508699421	508699765	TRITD3Bv1G165820.1	nuclear pore complex protein (DUF3414)
chr3B	508708926	508709303	TRITD3Bv1G165830.1	ATP binding cassette subfamily B4
chr3B	508717079	508717486	TRITD3Bv1G165840.1	Retrotransposon protein, putative, Ty3-gypsy subclass
chr3B	508774904	508775416	TRITD3Bv1G165850.1	Uroporphyrinogen decarboxylase
chr3B	508774904	508776436	TRITD3Bv1G165850.2	UDP-N-acetylglucosamine--N-acetylmuramyl-(pentapeptide) pyrophosphoryl-undecaprenol N-acetylglucosamine transferase
chr3B	508777305	508778416	TRITD3Bv1G165860.1	Alkanal monooxygenase alpha chain
chr3B	508783196	508783711	TRITD3Bv1G165870.1	Retrovirus-related Pol polyprotein from transposon TNT 1-94
chr3B	508814460	508814876	TRITD3Bv1G165880.1	Retrotransposon protein, putative, Ty3-gypsy subclass
chr3B	508831263	508831721	TRITD3Bv1G165890.1	Homeodomain-like superfamily protein
chr3B	508891448	508891921	TRITD3Bv1G165900.1	lipase class 3 family protein
chr3B	508910233	508910601	TRITD3Bv1G165910.1	Retrotransposon protein, putative, unclassified
chr3B	508957961	508958509	TRITD3Bv1G165920.1	Flavonoid 3',5'-hydroxylase
chr3B	509031579	509032160	TRITD3Bv1G165930.1	PsbP-like protein 2
chr3B	509045867	509046289	TRITD3Bv1G165940.1	Mitochondrial transcription termination factor
chr3B	509052255	509052644	TRITD3Bv1G165950.1	Adenylate kinase
chr3B	509052707	509054113	TRITD3Bv1G165960.1	Glycosyltransferase
chr3B	509056558	509057031	TRITD3Bv1G165970.1	lipase class 3 family protein
chr3B	509067815	509068321	TRITD3Bv1G165980.1	NB-ARC domain-containing disease resistance protein
chr3B	509069049	509069570	TRITD3Bv1G165990.1	2-oxoglutarate (2OG) and Fe(II)-dependent oxygenase superfamily protein
chr3B	509071496	509074235	TRITD3Bv1G166000.1	UDP-glycosyltransferase
chr3B	509073524	509074238	TRITD3Bv1G166010.1	electron-transfer flavoprotein:ubiquinone oxidoreductase
chr3B	509076148	509076715	TRITD3Bv1G166020.1	protein kinase family protein
chr3B	509088652	509089035	TRITD3Bv1G166030.1	homeodomain GLABROUS 2
chr3B	509144659	509145197	TRITD3Bv1G166040.1	Transcriptional factor B3 family protein
chr3B	509146393	509147823	TRITD3Bv1G166050.1	Glycosyltransferase
chr3B	509184138	509184335	TRITD3Bv1G166070.1	Calmodulin binding protein-like protein
chr3B	509209343	509209675	TRITD3Bv1G166100.1	Pol polyprotein
chr3B	509295564	509295980	TRITD3Bv1G166130.1	Arginine--tRNA ligase
chr3B	509297226	509297760	TRITD3Bv1G166140.1	ACT domain repeat 7
chr3B	509301213	509301656	TRITD3Bv1G166150.1	zinc knuckle (CCHC-type) family protein
chr3B	509301213	509301656	TRITD3Bv1G166150.2	acyl-UDP-N-acetylglucosamine O-acyltransferase
chr3B	509336200	509336583	TRITD3Bv1G166160.1	UvrABC system protein C
chr3B	509403583	509403894	TRITD3Bv1G166200.1	Retrotransposon protein, putative, unclassified
chr3B	509554228	509554686	TRITD3Bv1G166220.1	Retrovirus-related Pol polyprotein from transposon TNT 1-94
chr3B	509570940	509571344	TRITD3Bv1G166230.1	Retrotransposon protein, putative, unclassified
chr3B	509600894	509601382	TRITD3Bv1G166240.1	Retrotransposon protein, putative, Ty3-gypsy subclass
chr3B	509635671	509636336	TRITD3Bv1G166250.1	Zinc finger, C3HC4 type (RING finger) family protein
chr3B	509722163	509723578	TRITD3Bv1G166290.1	Glycosyltransferase
chr3B	509750079	509751987	TRITD3Bv1G166330.4	3-ketoacyl-CoA synthase
chr3B	509828556	509828963	TRITD3Bv1G166340.1	Retrotransposon protein, putative, Ty3-gypsy subclass
chr3B	509831216	509831539	TRITD3Bv1G166350.1	Retrotransposon protein, putative, Ty3-gypsy subclass
chr3B	509990677	509991057	TRITD3Bv1G166360.1	Serine carboxypeptidase S28 family protein
chr3B	510004187	510005614	TRITD3Bv1G166370.2	Glycosyltransferase
chr3B	510024301	510030661	TRITD3Bv1G166380.5	Respiratory burst oxidase
chr3B	510035647	510036048	TRITD3Bv1G166390.1	RNA-directed DNA polymerase (reverse transcriptase)-related family protein
chr3B	510039558	510040112	TRITD3Bv1G166420.1	LINE-1 reverse transcriptase like
chr3B	510055654	510056246	TRITD3Bv1G166440.1	Galactoside 2-alpha-L-fucosyltransferase 2
chr3B	510057302	510057868	TRITD3Bv1G166450.1	50S ribosomal protein L20
chr3B	510083039	510085599	TRITD3Bv1G166460.1	WRKY family transcription factor
chr3B	510085378	510085599	TRITD3Bv1G166460.3	WRKY transcription factor, putative
chr3B	510085397	510085888	TRITD3Bv1G166460.4	2-dehydro-3-deoxyphosphooctonate aldolase
chr3B	510233089	510233508	TRITD3Bv1G166490.1	Pol polyprotein
chr3B	510245277	510245636	TRITD3Bv1G166500.1	ELF4-like 2
chr3B	510287040	510287510	TRITD3Bv1G166510.1	Retrovirus-related Pol polyprotein from transposon TNT 1-94
chr3B	510304416	510309079	TRITD3Bv1G166520.1	NADPH--cytochrome P450 reductase
chr3B	510309314	510311808	TRITD3Bv1G166530.1	AT hook motif-containing protein, putative
chr3B	510309854	510310968	TRITD3Bv1G166530.2	Cadmium/zinc-transporting ATPase 3
chr3B	510309854	510311808	TRITD3Bv1G166530.3	AT hook motif-containing protein, putative
chr3B	510310491	510310954	TRITD3Bv1G166530.4	cellulose synthase A4
chr3B	510310491	510311098	TRITD3Bv1G166530.5	cation/H+ exchanger 17
chr3B	510315994	510316332	TRITD3Bv1G166540.1	Cytochrome bo(3) ubiquinol oxidase subunit 1
chr3B	510316812	510317419	TRITD3Bv1G166550.1	Transposon protein, putative, CACTA, En/Spm sub-class, expressed
chr3B	510327731	510329161	TRITD3Bv1G166600.1	BURP domain protein RD22
chr3B	510328434	510329010	TRITD3Bv1G166610.1	Unknown protein
chr3B	510333529	510334218	TRITD3Bv1G166620.1	50S ribosomal protein L2
chr3B	510346215	510346526	TRITD3Bv1G166630.1	Retrovirus-related Pol polyprotein from transposon TNT 1-94
chr3B	510489876	510491704	TRITD3Bv1G166640.1	PHD finger family protein / bromo-adjacent homology (BAH) domain-containing protein
chr3B	510493127	510493954	TRITD3Bv1G166650.1	TTF-type zinc finger protein with HAT dimerization domain-containing protein
chr3B	510557383	510559479	TRITD3Bv1G166660.1	Caleosin
chr3B	510558089	510559479	TRITD3Bv1G166660.2	Caleosin
chr3B	510599347	510599778	TRITD3Bv1G166670.1	Retrovirus-related Pol polyprotein from transposon TNT 1-94
chr3B	510642693	510643025	TRITD3Bv1G166680.1	Retrotransposon protein, putative, unclassified
chr3B	510648264	510648605	TRITD3Bv1G166690.1	Retrotransposon protein, putative, Ty3-gypsy subclass
chr3B	510679753	510680208	TRITD3Bv1G166710.1	Retrotransposon protein, putative, Ty3-gypsy subclass
chr3B	510709729	510710190	TRITD3Bv1G166720.1	Transposon protein, putative, CACTA, En/Spm sub-class
chr3B	510748729	510749034	TRITD3Bv1G166730.1	Retrovirus-related Pol polyprotein from transposon opus
chr3B	510773185	510773901	TRITD3Bv1G166740.1	Retrotransposon protein, putative, Ty3-gypsy subclass
chr3B	510874070	510874875	TRITD3Bv1G166750.1	Heat shock transcription factor
chr3B	510930849	510931589	TRITD3Bv1G166760.1	Retrovirus-related Pol polyprotein from transposon TNT 1-94
chr3B	510965385	510965750	TRITD3Bv1G166770.1	fip1 motif-containing protein
chr3B	511055450	511055755	TRITD3Bv1G166780.1	Apocytochrome f
chr3B	511107387	511107842	TRITD3Bv1G166790.1	Retrotransposon protein, putative, Ty3-gypsy subclass
chr3B	511229530	511229853	TRITD3Bv1G166800.1	Pentatricopeptide repeat-containing protein, putative
chr3B	511230819	511233667	TRITD3Bv1G166810.1	Flavin-containing monooxygenase
chr3B	511340488	511341438	TRITD3Bv1G166820.1	30S ribosomal protein S9
chr3B	511341381	511341695	TRITD3Bv1G166820.2	tRNA (guanine(10)-N2)-methyltransferase homolog
chr3B	511520283	511529793	TRITD3Bv1G166860.1	Myb/SANT-like DNA-binding domain protein
chr3B	511530530	511530949	TRITD3Bv1G166870.1	Transposon protein, putative, CACTA, En/Spm sub-class
chr3B	511543593	511543925	TRITD3Bv1G166880.1	Galactose oxidase/kelch repeat superfamily protein
chr3B	511582913	511583275	TRITD3Bv1G166890.1	Gag polyprotein
chr3B	511630419	511630748	TRITD3Bv1G166900.1	Pneumococcal vaccine antigen A
chr3B	511631685	511632780	TRITD3Bv1G166910.1	Retrotransposon protein, putative, unclassified
chr3B	511662780	511663417	TRITD3Bv1G166920.1	Acyl carrier protein 1, chloroplastic
chr3B	511666899	511674302	TRITD3Bv1G166930.1	GTP-binding protein
chr3B	511777131	511777328	TRITD3Bv1G166940.1	Mitochondrial import receptor subunit TOM7-1
chr3B	511962467	511962844	TRITD3Bv1G166960.1	RING/FYVE/PHD zinc finger superfamily protein
chr3B	512007292	512008755	TRITD3Bv1G166970.1	RING/FYVE/PHD zinc finger superfamily protein, putative

## Sheet: QLrusw6BS
Annotated genes within the leaf rust resistance QTL interval of Qlr.usw-6BS in Gaza
Chromosome	Start position	End position	Transcript ID	Annotation
chr6B_part1	1884793	1885125	TRITD6Bv1G000530.1	Retrovirus-related Pol polyprotein from transposon TNT 1-94
chr6B_part1	1903851	1905661	TRITD6Bv1G000540.1	Disease resistance protein (TIR-NBS-LRR class) family
chr6B_part1	1903851	1907758	TRITD6Bv1G000540.2	ATP-dependent Clp protease ATP-binding subunit ClpX
chr6B_part1	1903851	1911664	TRITD6Bv1G000540.3	Disease resistance protein RPP13
chr6B_part1	1903851	1912772	TRITD6Bv1G000540.4	Disease resistance protein (TIR-NBS-LRR class) family
chr6B_part1	1903851	1912772	TRITD6Bv1G000540.5	Disease resistance protein (TIR-NBS-LRR class) family
chr6B_part1	1903851	1912772	TRITD6Bv1G000540.6	Disease resistance protein (TIR-NBS-LRR class) family
chr6B_part1	1903851	1913314	TRITD6Bv1G000540.7	Disease resistance protein (TIR-NBS-LRR class) family
chr6B_part1	1903851	1914670	TRITD6Bv1G000540.8	Disease resistance protein (NBS-LRR class) family
chr6B_part1	1905645	1913314	TRITD6Bv1G000540.9	Disease resistance protein (CC-NBS-LRR class) family
chr6B_part1	1913423	1914861	TRITD6Bv1G000540.10	Leucine-rich repeat receptor-like protein kinase family protein
chr6B_part1	1913423	1914884	TRITD6Bv1G000540.11	Leucine-rich repeat receptor-like protein kinase family protein
chr6B_part1	1917083	1917748	TRITD6Bv1G000550.1	NBS-LRR resistance-like protein
chr6B_part1	1923334	1924641	TRITD6Bv1G000560.1	LINE-1 reverse transcriptase
chr6B_part1	1924777	1925361	TRITD6Bv1G000570.1	RNA-directed DNA polymerase (Reverse transcriptase)
chr6B_part1	1960514	1960831	TRITD6Bv1G000580.1	Phosphonoacetaldehyde hydrolase
chr6B_part1	1981120	1982781	TRITD6Bv1G000590.1	carboxyl-terminal peptidase, putative (DUF239)
chr6B_part1	1990772	1991248	TRITD6Bv1G000600.1	Protein FAR1-RELATED SEQUENCE 5
chr6B_part1	2003790	2004409	TRITD6Bv1G000610.1	Receptor-like protein kinase
chr6B_part1	2004217	2004647	TRITD6Bv1G000610.2	Receptor-like protein kinase
chr6B_part1	2004217	2005069	TRITD6Bv1G000610.3	receptor kinase 1
chr6B_part1	2004217	2005089	TRITD6Bv1G000610.4	receptor kinase 1
chr6B_part1	2004381	2004647	TRITD6Bv1G000610.5	Receptor-like protein kinase
chr6B_part1	2004381	2005165	TRITD6Bv1G000610.6	Receptor-like protein kinase
chr6B_part1	2004718	2005089	TRITD6Bv1G000610.7	protein kinase family protein
chr6B_part1	2005267	2005917	TRITD6Bv1G000620.1	Serine/threonine-protein kinase
chr6B_part1	2015074	2016368	TRITD6Bv1G000590.3	Malic enzyme
chr6B_part1	2016238	2018520	TRITD6Bv1G000590.4	carboxyl-terminal peptidase (DUF239)
chr6B_part1	2016238	2018520	TRITD6Bv1G000590.5	carboxyl-terminal peptidase, putative (DUF239)
chr6B_part1	2031127	2032255	TRITD6Bv1G000630.1	Protein FAR1-RELATED SEQUENCE 3
chr6B_part1	2032560	2034018	TRITD6Bv1G000630.12	L-type lectin-domain containing receptor kinase IV.1
chr6B_part1	2032601	2033786	TRITD6Bv1G000630.13	P-loop containing nucleoside triphosphate hydrolases superfamily protein
chr6B_part1	2033656	2034018	TRITD6Bv1G000630.18	Sulfite reductase [NADPH] flavoprotein alpha-component
chr6B_part1	2037803	2038153	TRITD6Bv1G000640.1	Retrotransposon protein, putative, unclassified
chr6B_part1	2050888	2052374	TRITD6Bv1G000650.1	Cell surface glycoprotein 1
chr6B_part1	2053696	2054340	TRITD6Bv1G000660.1	Protein disulfide-isomerase
chr6B_part1	2062239	2063788	TRITD6Bv1G000680.1	RING/U-box superfamily protein
chr6B_part1	2062257	2063315	TRITD6Bv1G000690.1	S-adenosyl-L-methionine-dependent methyltransferases superfamily protein
chr6B_part1	2064139	2064510	TRITD6Bv1G000700.1	Large-conductance mechanosensitive channel
chr6B_part1	2064675	2065151	TRITD6Bv1G000710.1	Type III pantothenate kinase
chr6B_part1	2067746	2071360	TRITD6Bv1G000720.1	Enhancer of polycomb-like protein
chr6B_part1	2162157	2162813	TRITD6Bv1G000730.1	Retrotransposon protein, putative, unclassified
chr6B_part1	2192800	2193102	TRITD6Bv1G000760.1	Listeriolysin O
chr6B_part1	2255720	2256115	TRITD6Bv1G000770.1	Retrovirus-related Pol polyprotein from transposon TNT 1-94
chr6B_part1	2263557	2264159	TRITD6Bv1G000800.1	Pol polyprotein
chr6B_part1	2288094	2288633	TRITD6Bv1G000820.1	Transposon protein, putative, CACTA, En/Spm sub-class
chr6B_part1	2302588	2306454	TRITD6Bv1G000830.1	tetratricopeptide repeat (TPR)-containing protein
chr6B_part1	2302678	2303223	TRITD6Bv1G000840.1	Leucine-rich repeat protein kinase family protein
chr6B_part1	2302687	2306454	TRITD6Bv1G000830.2	tetratricopeptide repeat (TPR)-containing protein
chr6B_part1	2302687	2306454	TRITD6Bv1G000830.3	tetratricopeptide repeat (TPR)-containing protein
chr6B_part1	2302687	2306454	TRITD6Bv1G000830.4	tetratricopeptide repeat (TPR)-containing protein
chr6B_part1	2302687	2306454	TRITD6Bv1G000830.5	tetratricopeptide repeat (TPR)-containing protein
chr6B_part1	2302997	2306454	TRITD6Bv1G000830.6	tetratricopeptide repeat (TPR)-containing protein
chr6B_part1	2303026	2306454	TRITD6Bv1G000830.7	Tpr repeat-containing thioredoxin tdx
chr6B_part1	2316615	2320783	TRITD6Bv1G000850.1	Protein disulfide-isomerase
chr6B_part1	2328219	2329349	TRITD6Bv1G000860.1	Translation initiation factor IF-2
chr6B_part1	2328253	2328974	TRITD6Bv1G000860.3	Keratinocyte proline-rich protein
chr6B_part1	2328253	2329349	TRITD6Bv1G000860.4	Cell surface glycoprotein 1
chr6B_part1	2328253	2329349	TRITD6Bv1G000860.6	Chaperone DnaJ-domain superfamily protein
chr6B_part1	2328253	2329349	TRITD6Bv1G000860.7	LIM domain-binding protein 3
chr6B_part1	2343359	2343784	TRITD6Bv1G000870.1	Transposon protein, putative, Mariner sub-class
chr6B_part1	2348555	2432695	TRITD6Bv1G000880.1	Disease resistance protein (TIR-NBS-LRR class) family
chr6B_part1	2348555	2432695	TRITD6Bv1G000880.2	Disease resistance protein (TIR-NBS-LRR class) family
chr6B_part1	2348803	2432695	TRITD6Bv1G000880.3	Disease resistance protein (TIR-NBS-LRR class) family
chr6B_part1	2348817	2432695	TRITD6Bv1G000880.4	Disease resistance protein (TIR-NBS-LRR class) family
chr6B_part1	2349267	2350277	TRITD6Bv1G000890.1	Leucine-rich repeat (LRR) family protein
chr6B_part1	2350578	2352148	TRITD6Bv1G000900.1	Holliday junction ATP-dependent DNA helicase RuvB
chr6B_part1	2366571	2369498	TRITD6Bv1G000910.1	carboxyl-terminal peptidase, putative (DUF239)
chr6B_part1	2375572	2375835	TRITD6Bv1G000920.1	serine-rich protein-like protein
chr6B_part1	2430072	2432695	TRITD6Bv1G000880.5	Disease resistance protein (TIR-NBS-LRR class) family
chr6B_part1	2431748	2432695	TRITD6Bv1G000880.6	Disease resistance protein (NBS-LRR class) family
chr6B_part1	2436510	2437040	TRITD6Bv1G000930.1	disease resistance protein (TIR-NBS-LRR class)
chr6B_part1	2452372	2455692	TRITD6Bv1G000940.1	ARM repeat superfamily protein

## Sheet: QLrusw6BL
Annotated genes within the leaf rust resistance QTL interval of Qlr.usw-6BL in Gaza
Chromosome	Start position	End position	Transcript ID	Annotation
chr6B	611130256	611130555	TRITD6Bv1G194300.1	Retrovirus-related Pol polyprotein from transposon 412 family
chr6B	611137395	611137883	TRITD6Bv1G194310.1	Retrovirus-related Pol polyprotein from transposon TNT 1-94
chr6B	611147969	611148709	TRITD6Bv1G194320.1	Transposon protein, putative, Mutator sub-class
chr6B	611166576	611166932	TRITD6Bv1G194330.1	HAD superfamily, subfamily IIIB acid phosphatase
chr6B	611334972	611337406	TRITD6Bv1G194380.1	Mannan endo-1,4-beta-mannosidase 4
chr6B	611399156	611399554	TRITD6Bv1G194410.1	Ribosomal RNA small subunit methyltransferase H
chr6B	611408946	611409569	TRITD6Bv1G194420.1	Retrotransposon protein, putative, Ty3-gypsy subclass
chr6B	611449220	611449927	TRITD6Bv1G194430.1	Retrovirus-related Pol polyprotein from transposon 17.6
chr6B	611541556	611542164	TRITD6Bv1G194450.1	Retrovirus-related Pol polyprotein from transposon TNT 1-94
chr6B	611581773	611585598	TRITD6Bv1G194460.6	BZIP transcription factor
chr6B	611585901	611586464	TRITD6Bv1G194470.1	DNA polymerase delta catalytic subunit
chr6B	611595890	611596249	TRITD6Bv1G194480.1	Histidine biosynthesis bifunctional protein HisB
chr6B	611670439	611670789	TRITD6Bv1G194530.1	Calcium/calmodulin-dependent 3',5'-cyclic nucleotide phosphodiesterase 1B
chr6B	611687976	611694216	TRITD6Bv1G194540.1	Ankyrin repeat family protein
chr6B	611693661	611694216	TRITD6Bv1G194540.2	Ankyrin repeat-containing protein
chr6B	611695900	611696103	TRITD6Bv1G194550.1	B3 domain-containing protein At5g24050
chr6B	611741971	611742315	TRITD6Bv1G194560.1	Retrotransposon protein, putative, Ty3-gypsy subclass
chr6B	611846102	611846497	TRITD6Bv1G194580.1	Pol polyprotein
chr6B	611881036	611881419	TRITD6Bv1G194590.1	Retrotransposon protein, putative, Ty3-gypsy subclass
chr6B	611939712	611940116	TRITD6Bv1G194600.1	Transposon protein, putative, CACTA, En/Spm sub-class
chr6B	611968646	611969002	TRITD6Bv1G194610.1	Retrovirus-related Pol polyprotein from transposon opus
chr6B	612002655	612003749	TRITD6Bv1G194620.1	2-oxoglutarate dehydrogenase E1 component
chr6B	612067271	612067813	TRITD6Bv1G194660.1	Retrotransposon protein, putative, unclassified
chr6B	612088111	612088440	TRITD6Bv1G194670.1	Retrovirus-related Pol polyprotein from transposon TNT 1-94
chr6B	612089347	612089664	TRITD6Bv1G194680.1	Phosphoenolpyruvate carboxykinase [GTP]
chr6B	612230933	612231373	TRITD6Bv1G194720.1	Potassium voltage-gated channel subfamily KQT member 1
chr6B	612329530	612329889	TRITD6Bv1G194730.1	Mediator of RNA polymerase II transcription subunit 4
chr6B	612394579	612394920	TRITD6Bv1G194740.1	Retrotransposon protein, putative, unclassified
chr6B	612409135	612409737	TRITD6Bv1G194760.1	Retrotransposon protein, putative, Ty3-gypsy subclass
chr6B	612435805	612436182	TRITD6Bv1G194770.1	Transposable element protein, putative
chr6B	612525490	612526092	TRITD6Bv1G194790.1	Vacuolar basic amino acid transporter 4
chr6B	612526186	612526533	TRITD6Bv1G194800.1	Flagellar L-ring protein
chr6B	612527199	612527495	TRITD6Bv1G194810.1	histone deacetylase-related / HD-like protein
chr6B	612595866	612597815	TRITD6Bv1G194870.1	ATP-dependent RNA helicase
chr6B	612721735	612722115	TRITD6Bv1G194940.1	K(+)/H(+) antiporter NhaP2
chr6B	612722137	612723255	TRITD6Bv1G194950.1	acylaminoacyl-peptidase-like protein
chr6B	612723222	612724356	TRITD6Bv1G194950.2	Aladin
chr6B	612723222	612725468	TRITD6Bv1G194950.3	E3 ubiquitin-protein ligase MARCH6
chr6B	612742075	612743211	TRITD6Bv1G194960.1	Transposon Ty3-I Gag-Pol polyprotein
chr6B	612742963	612743259	TRITD6Bv1G194960.2	Structural maintenance of chromosomes protein 2
chr6B	612785827	612789056	TRITD6Bv1G194970.1	DNA-directed RNA polymerase subunit
chr6B	612796682	612799599	TRITD6Bv1G194980.1	Nitrite reductase
chr6B	612832549	612832938	TRITD6Bv1G194990.1	CDK inhibitor P21 binding protein
chr6B	612848430	612848804	TRITD6Bv1G195000.1	Transposon protein, putative, CACTA, En/Spm sub-class
chr6B	612879228	612879685	TRITD6Bv1G195010.1	Peroxisomal multifunctional enzyme type 2
chr6B	612881071	612881304	TRITD6Bv1G195020.1	ARM repeat superfamily protein
chr6B	612881651	612881893	TRITD6Bv1G195030.1	Transposase
chr6B	612897804	612899281	TRITD6Bv1G195040.1	Alpha-amylase
chr6B	612898534	612898875	TRITD6Bv1G195050.1	Cytosolic Fe-S cluster assembly factor CFD1
chr6B	612919907	612920230	TRITD6Bv1G195090.1	initiator tRNA phosphoribosyl transferase family protein
chr6B	612922410	612923180	TRITD6Bv1G195100.1	Retrotransposon protein, putative, Ty3-gypsy subclass
chr6B	612926644	612926952	TRITD6Bv1G195110.1	DEAD-box ATP-dependent RNA helicase 40
chr6B	612960373	612960690	TRITD6Bv1G195120.1	P-loop containing nucleoside triphosphate hydrolases superfamily protein
chr6B	612967226	612968749	TRITD6Bv1G195130.1	Protein IQ-DOMAIN 1
chr6B	612970383	612970685	TRITD6Bv1G195140.1	Calcium-dependent lipid-binding (CaLB domain) family protein
chr6B	612990361	612991989	TRITD6Bv1G195150.1	Alpha-amylase
chr6B	612990882	612991829	TRITD6Bv1G195160.1	110 kDa 4SNc-Tudor domain protein
chr6B	612990928	612991269	TRITD6Bv1G195160.2	tRNA-2-methylthio-N(6)-dimethylallyladenosine synthase
chr6B	612995309	612998787	TRITD6Bv1G195170.1	Serine--tRNA ligase
chr6B	613180251	613180808	TRITD6Bv1G195180.1	Retrotransposon protein, putative, unclassified
chr6B	613201657	613203085	TRITD6Bv1G195190.2	RNA-binding (RRM/RBD/RNP motifs) family protein
chr6B	613284393	613285204	TRITD6Bv1G195200.3	Allene oxide cyclase
chr6B	613307533	613307859	TRITD6Bv1G195210.1	Retrotransposon protein, putative, Ty3-gypsy subclass
chr6B	613378928	613379359	TRITD6Bv1G195250.1	F-box/LRR protein
chr6B	613389864	613390250	TRITD6Bv1G195260.1	histone acetyltransferase of the CBP family 12
chr6B	613414523	613415238	TRITD6Bv1G195270.1	LINE-1 reverse transcriptase-like protein
chr6B	613432582	613450287	TRITD6Bv1G195280.3	Kinesin-like protein
chr6B	613547321	613548148	TRITD6Bv1G195330.1	LINE-1 reverse transcriptase like
chr6B	613549974	613550285	TRITD6Bv1G195340.1	Retrotransposon protein, putative, unclassified
chr6B	613550367	613550945	TRITD6Bv1G195350.1	Phosphopantetheine adenylyltransferase
chr6B	613551410	613551979	TRITD6Bv1G195360.1	Retrotransposon protein, putative, unclassified
chr6B	613552104	613552472	TRITD6Bv1G195370.1	FTSH protease 12
chr6B	613563418	613564614	TRITD6Bv1G195380.1	F-box family protein, putative
chr6B	613565281	613565907	TRITD6Bv1G195390.1	L-threonine 3-dehydrogenase, mitochondrial
chr6B	613576639	613577139	TRITD6Bv1G195400.1	Retrovirus-related Pol polyprotein from transposon TNT 1-94
chr6B	613590235	613590555	TRITD6Bv1G195410.1	Expansin protein
chr6B	613590569	613590919	TRITD6Bv1G195420.1	sodium hydrogen exchanger 4
chr6B	613607122	613607805	TRITD6Bv1G195430.1	ArfGap/RecO-like zinc finger domain-containing protein
chr6B	613618954	613619376	TRITD6Bv1G195440.1	stress response NST1-like protein
chr6B	613641295	613642386	TRITD6Bv1G195450.1	Aldolase superfamily protein
chr6B	613742774	613743079	TRITD6Bv1G195500.1	Retrotransposon protein, putative, unclassified
chr6B	613751389	613751847	TRITD6Bv1G195510.1	Retrotransposon protein, putative, Ty3-gypsy subclass
chr6B	613810534	613810866	TRITD6Bv1G195520.1	Reverse transcriptase
chr6B	613811109	613811501	TRITD6Bv1G195530.1	Retrovirus-related Pol polyprotein from transposon TNT 1-94
chr6B	613825757	613826446	TRITD6Bv1G195540.1	Homeobox protein Hox-A3
chr6B	613826202	613826594	TRITD6Bv1G195540.2	Endo-1,3(4)-beta-glucanase 2
chr6B	613828401	613829159	TRITD6Bv1G195550.1	Translation initiation factor IF-2
chr6B	613850249	613850695	TRITD6Bv1G195580.1	nuclear factor Y, subunit A6
chr6B	613855801	613856184	TRITD6Bv1G195590.1	RNA-directed DNA polymerase (reverse transcriptase)-related family protein
chr6B	613864669	613864923	TRITD6Bv1G195630.1	Ubiquitin-conjugating enzyme E2 Z
chr6B	613866513	613867142	TRITD6Bv1G195640.1	Retrovirus-related Pol polyprotein from transposon TNT 1-94
chr6B	613874891	613875196	TRITD6Bv1G195650.1	Ubiquitin carboxyl-terminal hydrolase-related protein
chr6B	613937565	613940035	TRITD6Bv1G195670.1	vesicle-associated protein 1-4
chr6B	613937841	613938472	TRITD6Bv1G195670.2	Thyrotropin-releasing hormone-degrading ectoenzyme
chr6B	613937841	613940392	TRITD6Bv1G195670.3	FYVE and coiled-coil domain-containing protein 1
chr6B	613937841	613940549	TRITD6Bv1G195670.4	Coatomer subunit delta
chr6B	613937841	613940693	TRITD6Bv1G195670.5	FYVE and coiled-coil domain-containing protein 1
chr6B	613937841	613940693	TRITD6Bv1G195670.6	Coatomer subunit delta
chr6B	613940011	613940549	TRITD6Bv1G195670.7	Coatomer subunit delta
chr6B	613940507	613941523	TRITD6Bv1G195670.8	Repressor of RNA polymerase III transcription maf1
chr6B	613940828	613941875	TRITD6Bv1G195670.9	RING/U-box superfamily protein, putative isoform 2
chr6B	613940828	613941875	TRITD6Bv1G195670.10	Transmembrane protein 59
chr6B	614123167	614123535	TRITD6Bv1G195680.1	ATP-dependent Clp protease proteolytic subunit
chr6B	614218119	614218577	TRITD6Bv1G195690.1	50S ribosomal protein L11
chr6B	614254647	614255177	TRITD6Bv1G195700.1	Retrotransposon protein, putative, unclassified
chr6B	614308123	614308443	TRITD6Bv1G195730.1	WASH complex subunit FAM21C
chr6B	614318492	614318914	TRITD6Bv1G195740.1	Ephrin type-A receptor 4-B
chr6B	614319070	614319930	TRITD6Bv1G195750.1	Zinc finger protein
chr6B	614355997	614356326	TRITD6Bv1G195760.1	Retrotransposon protein, putative, Ty3-gypsy subclass
chr6B	614378297	614378914	TRITD6Bv1G195790.1	Retrotransposon protein, putative, Ty3-gypsy subclass
chr6B	614488479	614488856	TRITD6Bv1G195820.1	Retrotransposon protein, putative, Ty3-gypsy subclass
chr6B	614540644	614540976	TRITD6Bv1G195840.1	Transposable element protein, putative, Retrotrans_gag
chr6B	614542077	614542691	TRITD6Bv1G195850.1	Retrovirus-related Pol polyprotein from transposon 17.6
chr6B	614572281	614572619	TRITD6Bv1G195860.1	Retrotransposon protein, putative, unclassified
chr6B	614708587	614709290	TRITD6Bv1G195870.1	ABC-2 and Plant PDR ABC-type transporter family protein
chr6B	614728960	614729307	TRITD6Bv1G195880.1	Transposon protein, putative, CACTA, En/Spm sub-class
chr6B	614754738	614755406	TRITD6Bv1G195890.1	Phosphoenolpyruvate carboxylase
chr6B	614830248	614830547	TRITD6Bv1G195900.1	Transposon Ty3-I Gag-Pol polyprotein
chr6B	614858933	614859754	TRITD6Bv1G195910.1	Retrovirus-related Pol polyprotein LINE-1
chr6B	614881469	614882008	TRITD6Bv1G195930.1	alpha/beta-Hydrolases superfamily protein
chr6B	614910099	614910512	TRITD6Bv1G195940.1	MuDR family transposase
chr6B	614910494	614913498	TRITD6Bv1G195940.2	Protein FAR1-RELATED SEQUENCE 5
chr6B	615038077	615038457	TRITD6Bv1G195950.1	Phosphatidylserine decarboxylase proenzyme
chr6B	615165222	615165665	TRITD6Bv1G195960.1	Retrotransposon protein, putative, unclassified
chr6B	615213263	615213793	TRITD6Bv1G195970.1	Transposon Ty3-I Gag-Pol polyprotein
chr6B	615220780	615221397	TRITD6Bv1G195980.1	Transposon protein, putative, CACTA, En/Spm sub-class
chr6B	615278595	615279533	TRITD6Bv1G195990.1	Retrotransposon protein, putative, Ty3-gypsy subclass
chr6B	615284870	615285286	TRITD6Bv1G196000.1	RHO guanyl-nucleotide exchange factor 2
chr6B	615290239	615293350	TRITD6Bv1G196010.2	Nuclear transcription factor Y subunit A7
chr6B	615306768	615307334	TRITD6Bv1G196020.1	Retrotransposon protein, putative, Ty3-gypsy subclass
chr6B	615319005	615319487	TRITD6Bv1G196030.1	Retrovirus-related Pol polyprotein from transposon TNT 1-94
chr6B	615365368	615365769	TRITD6Bv1G196040.1	Retrotransposon protein, putative, unclassified
chr6B	615396006	615397535	TRITD6Bv1G196050.2	Basic helix-loop-helix transcription factor
chr6B	615405157	615405465	TRITD6Bv1G196060.1	Glutathione S-transferase T3
chr6B	615405206	615405397	TRITD6Bv1G196060.2	Leucine-rich repeat protein kinase family protein
chr6B	615411346	615411540	TRITD6Bv1G196070.1	NADH dehydrogenase subunit 4
chr6B	615412918	615413349	TRITD6Bv1G196080.1	NADH-ubiquinone oxidoreductase chain 4
chr6B	615415869	615416942	TRITD6Bv1G196090.1	Zinc finger A20 and AN1 domain-containing stress-associated protein 1
chr6B	615446625	615446924	TRITD6Bv1G196100.1	Transposon protein, putative, Mutator sub-class
chr6B	615473510	615474031	TRITD6Bv1G196110.1	Retrotransposon protein, putative, unclassified
chr6B	615524046	615524516	TRITD6Bv1G196120.1	Gag-Pol polyprotein
chr6B	615593067	615593423	TRITD6Bv1G196150.1	Retrotransposon protein, putative, Ty3-gypsy subclass
chr6B	615609401	615612554	TRITD6Bv1G196160.1	Replication protein A 70 kDa DNA-binding subunit
chr6B	615615403	615616236	TRITD6Bv1G196170.1	cysteine-rich RECEPTOR-like kinase
chr6B	615615925	615616236	TRITD6Bv1G196170.2	receptor kinase 1
chr6B	615616966	615618165	TRITD6Bv1G196180.1	Receptor-like protein kinase
chr6B	615618265	615618698	TRITD6Bv1G196190.1	protein kinase family protein
chr6B	615621266	615621649	TRITD6Bv1G196200.1	Pentatricopeptide repeat (PPR) superfamily protein
chr6B	615624393	615625722	TRITD6Bv1G196210.1	Ubiquitin-like protein ATG12
chr6B	615628135	615629780	TRITD6Bv1G196220.1	ubiquitin-protein ligase 2
chr6B	615628135	615630155	TRITD6Bv1G196220.2	cellulose synthase-like D3
chr6B	615630775	615631662	TRITD6Bv1G196230.1	phosphotransferases/inositol or phosphatidylinositol kinase
chr6B	615630775	615631662	TRITD6Bv1G196230.2	TBP-associated factor 4
chr6B	615631649	615633069	TRITD6Bv1G196230.3	myb-like transcription factor family protein
chr6B	615633393	615634738	TRITD6Bv1G196240.1	SPFH/Band 7/PHB domain-containing membrane-associated protein family
chr6B	615635693	615636248	TRITD6Bv1G196250.1	5'-3' exonuclease family protein
chr6B	615636866	615638046	TRITD6Bv1G196260.1	Phosphatidylserine decarboxylase proenzyme 1, mitochondrial
chr6B	615636866	615638046	TRITD6Bv1G196260.2	Protein kinase superfamily protein
chr6B	615638050	615639383	TRITD6Bv1G196270.1	Protein jagged-1
chr6B	615711323	615711694	TRITD6Bv1G196280.1	myosin
chr6B	615745002	615745406	TRITD6Bv1G196290.1	Transposable element protein, putative, Retrotrans_gag
chr6B	615754685	615755047	TRITD6Bv1G196300.1	Transposon Ty3-I Gag-Pol polyprotein
chr6B	615874395	615874793	TRITD6Bv1G196310.1	Retrotransposon protein, putative, unclassified
chr6B	615944550	615944927	TRITD6Bv1G196320.1	Aconitate hydratase
chr6B	615993361	615994791	TRITD6Bv1G196330.1	Growth-regulating factor
chr6B	616024044	616024346	TRITD6Bv1G196340.1	AP-5 complex subunit beta-like protein
chr6B	616105032	616105364	TRITD6Bv1G196350.1	Inhibitor of nuclear factor kappa-B kinase subunit beta
chr6B	616132977	616133498	TRITD6Bv1G196360.1	Ribonuclease VapC43
chr6B	616138397	616138807	TRITD6Bv1G196370.1	Retrovirus-related Pol polyprotein from transposon TNT 1-94
chr6B	616167190	616167504	TRITD6Bv1G196380.1	50S ribosomal protein L3
chr6B	616214597	616214899	TRITD6Bv1G196390.1	Retrotransposon protein, putative, unclassified
chr6B	616245453	616245989	TRITD6Bv1G196400.1	Retrotransposon protein, putative, Ty3-gypsy subclass
chr6B	616402158	616402760	TRITD6Bv1G196430.1	Retrotransposon protein, putative, unclassified
chr6B	616447470	616455814	TRITD6Bv1G196440.2	DENN domain-containing protein
chr6B	616478113	616478475	TRITD6Bv1G196450.1	Gag-Pol polyprotein
chr6B	616537721	616538110	TRITD6Bv1G196480.1	Retrotransposon protein, putative, Ty3-gypsy subclass
chr6B	616541165	616541476	TRITD6Bv1G196490.1	Cleavage and polyadenylation specificity factor subunit 4
chr6B	616570051	616570383	TRITD6Bv1G196500.1	NAC domain-containing protein 29
chr6B	616600384	616600869	TRITD6Bv1G196520.1	Retrotransposon protein, putative, Ty3-gypsy subclass
chr6B	616611792	616612145	TRITD6Bv1G196530.1	ATP-dependent Clp protease proteolytic subunit
chr6B	616660178	616661062	TRITD6Bv1G196550.1	Transposable element protein, putative, Retrotrans_gag
chr6B	616714126	616714566	TRITD6Bv1G196570.1	nuclear pore complex protein (DUF3414)
chr6B	616748699	616749037	TRITD6Bv1G196580.1	Retrotransposon protein, putative, Ty1-copia subclass
chr6B	616787801	616790727	TRITD6Bv1G196590.1	Hydroxycinnamoyl-CoA shikimate/quinate hydroxycinnamoyltransferase
chr6B	616788197	616791038	TRITD6Bv1G196590.2	Hydroxycinnamoyl-CoA shikimate/quinate hydroxycinnamoyltransferase
chr6B	616788201	616790158	TRITD6Bv1G196590.3	Phosphoheptose isomerase
chr6B	616816532	616817032	TRITD6Bv1G196600.1	Vacuolar sorting-associated protein (DUF946)
chr6B	616827105	616827635	TRITD6Bv1G196610.1	Retrotransposon protein, putative, unclassified
chr6B	616877221	616877661	TRITD6Bv1G196620.1	Retrotransposon protein, putative, Ty3-gypsy subclass
chr6B	616909057	616909557	TRITD6Bv1G196640.1	Retrovirus-related Pol polyprotein from transposon TNT 1-94
chr6B	617017873	617018298	TRITD6Bv1G196650.1	Retrotransposon protein, putative, Ty3-gypsy subclass
chr6B	617025313	617025717	TRITD6Bv1G196660.1	Retrovirus-related Pol polyprotein from transposon TNT 1-94
chr6B	617035212	617042035	TRITD6Bv1G196670.2	Receptor protein kinase
chr6B	617043061	617045482	TRITD6Bv1G196680.1	cleavage and polyadenylation specificity factor 73-I
chr6B	617051851	617052264	TRITD6Bv1G196690.1	Retrovirus-related Pol polyprotein from transposon TNT 1-94
chr6B	617189878	617190318	TRITD6Bv1G196700.1	Proteasome subunit alpha type
chr6B	617245336	617245707	TRITD6Bv1G196730.1	Pol polyprotein
chr6B	617246332	617246688	TRITD6Bv1G196740.1	Pol polyprotein
chr6B	617416813	617433637	TRITD6Bv1G196760.4	myosin
chr6B	617434026	617434442	TRITD6Bv1G196770.1	Chitin synthase 3
chr6B	617434479	617436756	TRITD6Bv1G196780.5	Kinase family protein
chr6B	617436007	617436801	TRITD6Bv1G196790.1	mitochondrial editing factor 21
chr6B	617436464	617436811	TRITD6Bv1G196790.2	Reaction center protein M chain
chr6B	617515755	617516279	TRITD6Bv1G196800.1	1-(5-phosphoribosyl)-5-[(5-phosphoribosylamino)methylideneamino] imidazole-4-carboxamide isomerase
chr6B	617523608	617523949	TRITD6Bv1G196810.1	Transposon protein, putative, CACTA, En/Spm sub-class
chr6B	617562909	617563238	TRITD6Bv1G196820.1	Retrotransposon protein, putative, Ty3-gypsy subclass
chr6B	617575872	617576336	TRITD6Bv1G196830.1	Pol polyprotein
chr6B	617587457	617588197	TRITD6Bv1G196860.1	Retrotransposon protein, putative, Ty3-gypsy subclass
chr6B	617653687	617654055	TRITD6Bv1G196870.1	Translation elongation factor EF1B, gamma chain
chr6B	617681683	617682318	TRITD6Bv1G196880.1	Retrotransposon protein, putative, Ty3-gypsy subclass
chr6B	617720180	617720719	TRITD6Bv1G196890.1	Retrovirus-related Pol polyprotein from transposon 17.6
chr6B	617735568	617747010	TRITD6Bv1G196900.3	Isoleucine--tRNA ligase
chr6B	617750940	617754394	TRITD6Bv1G196910.1	Histone acetyltransferase
chr6B	617757826	617763031	TRITD6Bv1G196920.1	FRIGIDA interacting protein 1
chr6B	617794629	617794931	TRITD6Bv1G196960.1	N utilization substance protein B homolog
chr6B	617801621	617801923	TRITD6Bv1G196990.1	Vacuolar-sorting receptor 2
chr6B	617843211	617843681	TRITD6Bv1G197000.1	Transposon protein, putative, Mutator sub-class
chr6B	617849302	617853436	TRITD6Bv1G197020.6	Pentatricopeptide repeat-containing protein
chr6B	617857515	617859548	TRITD6Bv1G197030.1	Heat shock cognate 70 kDa protein 1
chr6B	617863740	617867381	TRITD6Bv1G197040.6	70 kDa heat shock protein
chr6B	617864407	617867444	TRITD6Bv1G197050.1	NAD-specific glutamate dehydrogenase
chr6B	617867046	617867444	TRITD6Bv1G197050.3	Carbon storage regulator homolog
chr6B	617884789	617885523	TRITD6Bv1G197060.1	Ribosomal large subunit pseudouridine synthase C
chr6B	617886093	617886695	TRITD6Bv1G197070.1	CC-NBS-LRR type resistance protein
chr6B	617921882	617922232	TRITD6Bv1G197080.1	threonyl-tRNA synthetase, putative / threonine-tRNA ligase
chr6B	617923192	617939759	TRITD6Bv1G197090.1	Pyridoxine/pyridoxamine 5'-phosphate oxidase
chr6B	617924328	617924627	TRITD6Bv1G197100.1	Neurexophilin-3
chr6B	617942965	617943282	TRITD6Bv1G197110.1	Tetratricopeptide repeat (TPR)-like superfamily protein
chr6B	618077846	618078238	TRITD6Bv1G197120.1	Retrotransposon protein, putative, Ty3-gypsy subclass
chr6B	618161735	618162157	TRITD6Bv1G197130.1	MSCS-like 3
chr6B	618175104	618175547	TRITD6Bv1G197140.1	Retrotransposon protein, putative, Ty3-gypsy subclass
chr6B	618175317	618175754	TRITD6Bv1G197140.2	Retrotransposon protein, putative, unclassified
chr6B	618197358	618197669	TRITD6Bv1G197150.1	Thymidylate kinase
chr6B	618259292	618261711	TRITD6Bv1G197160.1	Ferredoxin--NADP reductase
chr6B	618263455	618264017	TRITD6Bv1G197170.1	Omega-3 fatty acid desaturase
chr6B	618272038	618273640	TRITD6Bv1G197180.1	H-2 class II histocompatibility antigen, A-Q alpha chain
chr6B	618277033	618279970	TRITD6Bv1G197190.4	Chalcone--flavonone isomerase
chr6B	618282344	618282946	TRITD6Bv1G197200.1	Retrotransposon protein, putative, Ty1-copia subclass
chr6B	618286920	618287699	TRITD6Bv1G197210.1	Electrogenic sodium bicarbonate cotransporter 1
chr6B	618288168	618288560	TRITD6Bv1G197220.1	Polynucleotidyl transferase, ribonuclease H-like superfamily protein
chr6B	618297304	618297663	TRITD6Bv1G197240.2	Copia polyprotein
chr6B	618300428	618302500	TRITD6Bv1G197250.1	Endoglucanase
chr6B	618361919	618362239	TRITD6Bv1G197270.1	UDP-N-acetylmuramoyl-L-alanyl-D-glutamate--2,6-diaminopimelate ligase
chr6B	618409406	618409705	TRITD6Bv1G197280.1	electron transporter, putative (Protein of unknown function, DUF547)
chr6B	618409549	618409869	TRITD6Bv1G197280.2	TATA-box-binding protein
chr6B	618488698	618489168	TRITD6Bv1G197310.1	Exodeoxyribonuclease 7 large subunit
chr6B	618489534	618492249	TRITD6Bv1G197320.1	Retrotransposon protein, putative, unclassified
chr6B	618511700	618615450	TRITD6Bv1G197330.1	Cytochrome c oxidase assembly factor 3, mitochondrial
chr6B	618511700	618615485	TRITD6Bv1G197330.2	Non-lysosomal glucosylceramidase
chr6B	618629485	618630447	TRITD6Bv1G197340.1	Retrovirus-related Pol polyprotein from transposon TNT 1-94
chr6B	618674661	618675209	TRITD6Bv1G197350.1	Zinc finger, CCHC-type
chr6B	618675648	618676238	TRITD6Bv1G197360.1	50S ribosomal protein L10
chr6B	618675681	618677627	TRITD6Bv1G197360.2	50S ribosomal protein L10
chr6B	618677953	618678393	TRITD6Bv1G197370.1	Endonuclease/exonuclease/phosphatase family protein
chr6B	618678748	618679650	TRITD6Bv1G197380.1	Retrotransposon protein, putative, unclassified
chr6B	618679670	618680488	TRITD6Bv1G197390.1	LINE-1 reverse transcriptase like
chr6B	618688529	618688969	TRITD6Bv1G197400.1	Transposon protein, putative, CACTA, En/Spm sub-class
chr6B	618709898	618710155	TRITD6Bv1G197410.1	Calcium-transporting ATPase
chr6B	618744212	618744802	TRITD6Bv1G197420.1	Cytochrome b559 subunit alpha
chr6B	618779995	618780546	TRITD6Bv1G197430.1	50S ribosomal protein L14
chr6B	618789324	618789695	TRITD6Bv1G197440.1	Retrotransposon protein, putative, Ty3-gypsy subclass
chr6B	618805665	618805988	TRITD6Bv1G197450.1	Transposon protein, putative, CACTA, En/Spm sub-class
chr6B	618873368	618873703	TRITD6Bv1G197460.1	SWAP (Suppressor-of-White-APricot)/surp domain-containing protein / D111/G-patch domain-containing protein
chr6B	618995864	618996310	TRITD6Bv1G197470.1	Transposon Ty3-I Gag-Pol polyprotein
chr6B	618997100	618997456	TRITD6Bv1G197480.1	ARID/BRIGHT DNA-binding domain-containing protein
chr6B	618997535	618997963	TRITD6Bv1G197490.1	Leucine-rich repeat protein kinase family protein
chr6B	619119410	619120388	TRITD6Bv1G197500.1	Xyloglucan endotransglucosylase/hydrolase
chr6B	619121607	619121966	TRITD6Bv1G197510.1	Activin receptor type-2A
chr6B	619122358	619125115	TRITD6Bv1G197520.1	MTD1
chr6B	619192631	619193038	TRITD6Bv1G197530.1	Retrovirus-related Pol polyprotein from transposon TNT 1-94
chr6B	619230584	619231114	TRITD6Bv1G197540.1	Gag-pol polyprotein
chr6B	619287664	619290024	TRITD6Bv1G197550.2	Subtilisin-like protease
chr6B	619311400	619314316	TRITD6Bv1G197570.1	BES1/BZR1 homolog 1
chr6B	619319307	619329327	TRITD6Bv1G197580.1	Kinase family protein
chr6B	619319632	619319937	TRITD6Bv1G197590.1	SoxAX cytochrome complex subunit A1
chr6B	619319938	619320279	TRITD6Bv1G197600.1	Shikimate dehydrogenase (NADP(+))
chr6B	619331227	619331553	TRITD6Bv1G197610.1	Kinase family protein
chr6B	619334271	619334699	TRITD6Bv1G197620.1	Polyadenylate-binding protein 4
chr6B	619334388	619335266	TRITD6Bv1G197630.1	U-box domain-containing protein 33
chr6B	619337043	619337372	TRITD6Bv1G197640.1	bromodomain and extraterminal domain protein 9
chr6B	619354273	619355259	TRITD6Bv1G197660.1	Chaperone protein HscA homolog
chr6B	619466849	619467628	TRITD6Bv1G197690.1	MADS-box transcription factor
chr6B	619482085	619482633	TRITD6Bv1G197700.1	S-adenosyl-L-methionine-dependent tRNA 4-demethylwyosine synthase
chr6B	619499934	619502201	TRITD6Bv1G197710.1	Aminotransferase-related family protein
chr6B	619516408	619518747	TRITD6Bv1G197720.1	Subtilisin-like protease
chr6B	619540592	619540909	TRITD6Bv1G197730.1	Pol polyprotein
chr6B	619556096	619556627	TRITD6Bv1G197740.1	Defensin
chr6B	619576833	619579976	TRITD6Bv1G197750.3	DNA (Cytosine-5-)-methyltransferase
chr6B	619582165	619583814	TRITD6Bv1G197760.1	Pentatricopeptide repeat-containing protein
chr6B	619620889	619621329	TRITD6Bv1G197770.1	U-box domain-containing protein 52
chr6B	619625588	619625959	TRITD6Bv1G197780.1	30S ribosomal protein S12
chr6B	619710319	619710849	TRITD6Bv1G197820.1	Protein FAR1-RELATED SEQUENCE 5
chr6B	619710853	619711146	TRITD6Bv1G197830.1	FAR1-related sequence protein
chr6B	619720562	619720945	TRITD6Bv1G197860.1	Retrotransposon protein, putative, Ty1-copia subclass
chr6B	619730314	619730619	TRITD6Bv1G197870.1	Teosinte glume architecture 1
chr6B	619738021	619738554	TRITD6Bv1G197880.1	RNA-directed DNA polymerase (Reverse transcriptase); Ribonuclease H
chr6B	619738997	619740169	TRITD6Bv1G197890.1	Pentatricopeptide repeat-containing protein
chr6B	619887946	619888368	TRITD6Bv1G197910.1	Transmembrane protein
chr6B	619939314	619939601	TRITD6Bv1G197930.1	Transposon protein, putative, CACTA, En/Spm sub-class
chr6B	620015027	620015323	TRITD6Bv1G197950.1	Reverse transcriptase
chr6B	620039373	620040004	TRITD6Bv1G197960.1	Nuclear transport factor 2 (NTF2) family protein with RNA binding (RRM-RBD-RNP motifs) domain-containing protein
chr6B	620040629	620041091	TRITD6Bv1G197970.1	Protein FAR1-RELATED SEQUENCE 5
chr6B	620047957	620050446	TRITD6Bv1G197980.1	Subtilisin-like protease
chr6B	620074640	620074957	TRITD6Bv1G197990.1	Nuclear transcription factor Y subunit alpha
chr6B	620079428	620079733	TRITD6Bv1G198000.1	Ferredoxin--NADP reductase
chr6B	620099019	620099351	TRITD6Bv1G198010.1	Transposon Ty3-I Gag-Pol polyprotein
chr6B	620128447	620128776	TRITD6Bv1G198020.1	V-type proton ATPase subunit a
chr6B	620215732	620217315	TRITD6Bv1G198030.1	Subtilisin-like protease
chr6B	620279309	620281651	TRITD6Bv1G198060.1	Subtilisin protease
chr6B	620285907	620286230	TRITD6Bv1G198070.1	tRNA-specific 2-thiouridylase MnmA
chr6B	620289108	620290067	TRITD6Bv1G198080.1	Aspartic proteinase nepenthesin-1
chr6B	620306230	620307297	TRITD6Bv1G198100.1	Retrotransposon protein, putative, Ty3-gypsy subclass
chr6B	620383414	620383725	TRITD6Bv1G198110.1	Retrotransposon protein, putative, Ty3-gypsy subclass
chr6B	620443951	620444759	TRITD6Bv1G198150.1	DNA-directed RNA polymerase subunit alpha
chr6B	620465225	620465527	TRITD6Bv1G198160.1	Pol polyprotein
chr6B	620548825	620552734	TRITD6Bv1G198170.1	1-deoxy-D-xylulose 5-phosphate synthase 3
chr6B	620549339	620550016	TRITD6Bv1G198180.1	DNA-(apurinic or apyrimidinic site) lyase
chr6B	620550353	620551030	TRITD6Bv1G198190.1	Retrovirus-related Pol polyprotein LINE-1
chr6B	620556473	620565703	TRITD6Bv1G198210.1	EXS (ERD1/XPR1/SYG1) domain-containing protein
chr6B	620558200	620558580	TRITD6Bv1G198220.1	Ribosomal protein S12 methylthiotransferase RimO
chr6B	620573087	620573665	TRITD6Bv1G198230.1	fold protein
chr6B	620593418	620593738	TRITD6Bv1G198240.1	Linoleate 9S-lipoxygenase A
chr6B	620619409	620619780	TRITD6Bv1G198250.1	Retrotransposon protein, putative, unclassified
chr6B	620840992	620841336	TRITD6Bv1G198290.1	Transposon protein, putative, CACTA, En/Spm sub-class
chr6B	620862332	620862829	TRITD6Bv1G198300.1	5'-3' exonuclease family protein
chr6B	620944970	620945335	TRITD6Bv1G198310.1	Retrotransposon protein, putative, unclassified
chr6B	620990182	620990586	TRITD6Bv1G198340.1	Gag-pol polyprotein
chr6B	621017302	621017712	TRITD6Bv1G198350.1	Retrovirus-related Pol polyprotein from transposon TNT 1-94
chr6B	621154760	621155206	TRITD6Bv1G198360.1	Retrotransposon protein, putative, Ty3-gypsy subclass
chr6B	621186575	621186997	TRITD6Bv1G198390.1	Translation initiation factor IF-2
chr6B	621192479	621193540	TRITD6Bv1G198400.1	NAD(P)-binding Rossmann-fold superfamily protein
chr6B	621365660	621365966	TRITD6Bv1G198410.1	Transposon protein, putative, Mutator sub-class, expressed
chr6B	621399481	621401087	TRITD6Bv1G198420.1	Glycosyltransferases
chr6B	621400126	621401106	TRITD6Bv1G198420.2	suppressor of npr1-1 constitutive 4
chr6B	621406523	621414725	TRITD6Bv1G198430.2	Protein EFR3-like protein
chr6B	621418557	621419910	TRITD6Bv1G198440.1	Ribonuclease
chr6B	621426542	621427036	TRITD6Bv1G198450.1	F-box family protein
chr6B	621426670	621427017	TRITD6Bv1G198450.2	Transcription elongation factor SPT5
chr6B	621456836	621460952	TRITD6Bv1G198460.1	U-box domain-containing protein
chr6B	621470177	621470515	TRITD6Bv1G198470.1	Pol polyprotein
chr6B	621523434	621527259	TRITD6Bv1G198480.1	Sn1-specific diacylglycerol lipase alpha
chr6B	621529812	621538325	TRITD6Bv1G198490.3	ATP-dependent RNA helicase DeaD
chr6B	621532004	621533457	TRITD6Bv1G198500.1	Retrovirus-related like polyprotein
chr6B	621936984	621937181	TRITD6Bv1G198520.1	DNA repair and meiosis protein (Mre11)
chr6B	621963181	621963555	TRITD6Bv1G198530.1	LINE-1 reverse transcriptase homolog
chr6B	621964223	621964918	TRITD6Bv1G198540.1	Retrotransposon protein, putative, unclassified
chr6B	621968747	621969197	TRITD6Bv1G198550.1	ribosome 60S biogenesis amino-terminal protein
chr6B	621969198	621969909	TRITD6Bv1G198560.1	tRNA pseudouridine synthase A
chr6B	621969278	621970393	TRITD6Bv1G198560.2	Elongation factor P--(R)-beta-lysine ligase
chr6B	621969394	621970393	TRITD6Bv1G198560.3	Pathogenesis-related homeodomain protein
chr6B	621969656	621970393	TRITD6Bv1G198560.4	Pathogenesis-related homeodomain protein
chr6B	621969884	621970393	TRITD6Bv1G198560.5	Type II iodothyronine deiodinase
chr6B	622230613	622230918	TRITD6Bv1G198630.1	Phosphatidylserine decarboxylase proenzyme
chr6B	622264523	622265059	TRITD6Bv1G198640.1	Transposon protein, putative, CACTA, En/Spm sub-class
chr6B	622270685	622273534	TRITD6Bv1G198650.1	Pectin lyase superfamily protein
chr6B	622278858	622279559	TRITD6Bv1G198660.1	ethylene-responsive transcription factor
chr6B	622324118	622324573	TRITD6Bv1G198680.1	Retrotransposon protein, putative, unclassified
chr6B	622372602	622372920	TRITD6Bv1G198690.1	DNA repair protein RadA
chr6B	622372802	622373899	TRITD6Bv1G198700.1	Nitrilase
chr6B	622374314	622376471	TRITD6Bv1G198710.1	10 kDa chaperonin
chr6B	622376830	622383644	TRITD6Bv1G198720.2	GPI ethanolamine phosphate transferase 2
chr6B	622380226	622380531	TRITD6Bv1G198730.1	Dehydrodolichyl diphosphate synthase complex subunit DHDDS
chr6B	622384041	622384798	TRITD6Bv1G198740.1	Lipid transfer protein
chr6B	622419687	622422704	TRITD6Bv1G198750.1	RING finger protein
chr6B	622425774	622430859	TRITD6Bv1G198760.3	Transducin/WD40 repeat-like superfamily protein
chr6B	622435310	622435702	TRITD6Bv1G198770.1	chromatin remodeling 5
chr6B	622441675	622445288	TRITD6Bv1G198780.1	zinc finger CCCH domain protein
chr6B	622462977	622463222	TRITD6Bv1G198790.1	plasma membrane H+-ATPase
chr6B	622509000	622509308	TRITD6Bv1G198800.1	Transposon protein, putative, CACTA, En/Spm sub-class
chr6B	622547479	622549533	TRITD6Bv1G198810.1	F-box family protein
chr6B	622553821	622554723	TRITD6Bv1G198820.1	alpha/beta-Hydrolases superfamily protein
chr6B	622553821	622555490	TRITD6Bv1G198820.2	von Willebrand factor A domain-containing protein 9
chr6B	622599639	622599980	TRITD6Bv1G198830.1	Retrotransposon protein, putative, Ty3-gypsy subclass
chr6B	622661475	622662158	TRITD6Bv1G198840.1	50S ribosomal protein L14
chr6B	622667122	622667463	TRITD6Bv1G198850.1	Transposon protein, putative, Mutator sub-class
chr6B	622679672	622680145	TRITD6Bv1G198880.1	vamp/synaptobrevin-associated protein 27-2
chr6B	622703372	622703740	TRITD6Bv1G198890.1	Transposon Ty3-I Gag-Pol polyprotein
chr6B	622720769	622722421	TRITD6Bv1G198900.1	F-box domain containing protein
chr6B	622722524	622723138	TRITD6Bv1G198910.1	F-box family protein
chr6B	622872358	622872756	TRITD6Bv1G198940.1	Pol polyprotein
chr6B	622881797	622882138	TRITD6Bv1G198950.1	Transposon protein, putative, CACTA, En/Spm sub-class
chr6B	622897653	622899259	TRITD6Bv1G198970.1	transducin family protein / WD-40 repeat family protein
chr6B	622904791	622905102	TRITD6Bv1G198980.1	Aldehyde dehydrogenase
chr6B	622925144	622927208	TRITD6Bv1G198990.1	F-box family protein
chr6B	622933528	622934967	TRITD6Bv1G199000.1	Transposon Ty3-I Gag-Pol polyprotein
chr6B	622935450	622936337	TRITD6Bv1G199010.1	Gag-Pol polyprotein
chr6B	622959983	622960657	TRITD6Bv1G199020.1	syntaxin of plants 73
chr6B	622962498	622963428	TRITD6Bv1G199030.1	kinase with adenine nucleotide alpha hydrolases-like domain-containing protein
chr6B	622970066	622970434	TRITD6Bv1G199040.1	Four and a half LIM domains protein 5
chr6B	623009486	623010142	TRITD6Bv1G199050.1	Helicase-like protein
chr6B	623048961	623049284	TRITD6Bv1G199060.1	Retrovirus-related Pol polyprotein LINE-1
chr6B	623063629	623064043	TRITD6Bv1G199070.1	U5 small nuclear ribonucleoprotein helicase
chr6B	623066529	623066846	TRITD6Bv1G199080.1	Retrotransposable element Tf2
chr6B	623067003	623067737	TRITD6Bv1G199090.1	Transposon Ty3-G Gag-Pol polyprotein
chr6B	623068175	623068612	TRITD6Bv1G199100.1	Reverse transcriptase
chr6B	623069175	623069597	TRITD6Bv1G199110.1	Transposon Ty3-G Gag-Pol polyprotein
chr6B	623113024	623113413	TRITD6Bv1G199120.1	Transposon protein, putative, CACTA, En/Spm sub-class
chr6B	623128673	623129098	TRITD6Bv1G199130.1	Coatomer subunit beta-like protein
chr6B	623152621	623153304	TRITD6Bv1G199140.1	F-box domain containing protein-like
chr6B	623154420	623154890	TRITD6Bv1G199150.1	50S ribosomal protein L11-1
chr6B	623192703	623195656	TRITD6Bv1G199160.1	Very-long-chain (3R)-3-hydroxyacyl-CoA dehydratase
chr6B	623213184	623213727	TRITD6Bv1G199170.1	translocase inner membrane subunit 23-3
chr6B	623214510	623216011	TRITD6Bv1G199180.1	Heme-responsive zinc finger transcription factor HAP1
chr6B	623465736	623468076	TRITD6Bv1G199190.1	3-ketoacyl-CoA synthase
chr6B	623540602	623540913	TRITD6Bv1G199200.1	Transient receptor potential cation channel subfamily M member 7
chr6B	623562078	623562560	TRITD6Bv1G199210.1	50S ribosomal protein L16
chr6B	623564017	623564481	TRITD6Bv1G199220.1	Pentatricopeptide repeat (PPR) superfamily protein
chr6B	623590548	623590937	TRITD6Bv1G199250.1	Retrotransposon protein, putative, Ty1-copia subclass
chr6B	623604534	623605034	TRITD6Bv1G199270.1	multidrug resistance-associated protein 13
chr6B	623605152	623605934	TRITD6Bv1G199280.1	NAD(P)-binding Rossmann-fold superfamily protein
chr6B	623632969	623633277	TRITD6Bv1G199290.1	Transposon protein, putative, CACTA, En/Spm sub-class
chr6B	623684216	623684809	TRITD6Bv1G199300.1	F-box family protein
chr6B	623697876	623699387	TRITD6Bv1G199310.1	3-ketoacyl-CoA synthase
chr6B	623703481	623703783	TRITD6Bv1G199320.1	3-ketoacyl-CoA synthase
chr6B	623726758	623729716	TRITD6Bv1G199340.1	Very-long-chain (3R)-3-hydroxyacyl-CoA dehydratase
chr6B	623754804	623755133	TRITD6Bv1G199350.1	LINE-1 reverse transcriptase-like protein
chr6B	623942235	623942543	TRITD6Bv1G199380.1	Retrotransposon protein, putative, Ty1-copia subclass
chr6B	623976272	623981418	TRITD6Bv1G199410.3	GPI-anchored adhesin-like protein
chr6B	624002004	624002750	TRITD6Bv1G199420.1	tRNA-2-methylthio-N(6)-dimethylallyladenosine synthase
chr6B	624003022	624004076	TRITD6Bv1G199430.1	Transposon protein, putative, Mutator sub-class
chr6B	624036941	624049612	TRITD6Bv1G199460.1	RRP12-like protein
chr6B	624044714	624046351	TRITD6Bv1G199470.1	Retrovirus-related Pol polyprotein from transposon TNT 1-94
chr6B	624051021	624051932	TRITD6Bv1G199480.1	PP2A regulatory subunit TAP46
chr6B	624051641	624052099	TRITD6Bv1G199480.2	NADH-quinone oxidoreductase subunit D
chr6B	624056042	624056383	TRITD6Bv1G199490.1	1-phosphatidylinositol-4-phosphate 5-kinase 3
chr6B	624056042	624057009	TRITD6Bv1G199490.2	Lactation elevated protein 1
chr6B	624067370	624067771	TRITD6Bv1G199500.1	Neuronal acetylcholine receptor subunit alpha-7
chr6B	624069340	624071079	TRITD6Bv1G199510.1	Protein FAR1-RELATED SEQUENCE 5
chr6B	624076862	624077179	TRITD6Bv1G199520.1	ATP synthase subunit b', chloroplastic
chr6B	624077888	624078455	TRITD6Bv1G199530.1	DNA topoisomerase
chr6B	624085448	624085749	TRITD6Bv1G199540.1	stromal ascorbate peroxidase
chr6B	624091665	624093540	TRITD6Bv1G199550.1	carboxyl-terminal peptidase (DUF239)
chr6B	624097171	624097479	TRITD6Bv1G199560.1	Regulator of G-protein signaling 3
chr6B	624100926	624101414	TRITD6Bv1G199570.1	Transposon protein, putative, CACTA, En/Spm sub-class
chr6B	624127641	624128051	TRITD6Bv1G199580.1	Glutathione S-transferase T3
chr6B	624131292	624134393	TRITD6Bv1G199590.1	Chaperone protein dnaJ
chr6B	624145919	624147290	TRITD6Bv1G199600.1	DNA topoisomerase
chr6B	624164636	624169052	TRITD6Bv1G199610.1	Protein kinase family protein
chr6B	624169088	624169507	TRITD6Bv1G199620.1	30S ribosomal protein S2
chr6B	624216854	624217381	TRITD6Bv1G199650.1	Retrovirus-related Pol polyprotein from transposon opus
chr6B	624277757	624278107	TRITD6Bv1G199660.1	O-fucosyltransferase family protein
chr6B	624294898	624295212	TRITD6Bv1G199670.1	Basic-leucine zipper (bZIP) transcription factor family protein
chr6B	624310300	624310623	TRITD6Bv1G199680.1	Retrotransposon protein, putative, unclassified
chr6B	624316517	624317191	TRITD6Bv1G199690.1	OTU domain-containing protein 6A
chr6B	624356825	624357476	TRITD6Bv1G199700.1	Heat-shock protein, putative
chr6B	624388621	624389112	TRITD6Bv1G199710.1	Heat-shock protein, putative
chr6B	624625058	624625633	TRITD6Bv1G199730.1	Pol polyprotein
chr6B	624626766	624627068	TRITD6Bv1G199740.1	Pol polyprotein
chr6B	624669337	624669672	TRITD6Bv1G199750.1	Retrovirus-related Pol polyprotein from transposon TNT 1-94
chr6B	624676563	624676886	TRITD6Bv1G199760.1	NAD(P)-binding Rossmann-fold superfamily protein
chr6B	624843314	624844921	TRITD6Bv1G199860.1	Tagatose 1,6-diphosphate aldolase 1
chr6B	624845461	624845930	TRITD6Bv1G199870.1	Mini-chromosome maintenance complex-binding protein
chr6B	624845881	624847759	TRITD6Bv1G199870.2	Leucine-rich repeat protein kinase family protein
chr6B	624847214	624847759	TRITD6Bv1G199870.3	ARM repeat superfamily protein
chr6B	624872929	624873348	TRITD6Bv1G199880.1	Polynucleotidyl transferase, ribonuclease H-like superfamily protein
chr6B	624877256	624877729	TRITD6Bv1G199890.1	Transposon protein, putative, CACTA, En/Spm sub-class
chr6B	624978948	624981125	TRITD6Bv1G199910.1	70 kDa heat shock protein
chr6B	625043264	625043617	TRITD6Bv1G199920.1	Isoleucine--tRNA ligase
chr6B	625061093	625061578	TRITD6Bv1G199930.1	Transposon protein, putative, CACTA, En/Spm sub-class
chr6B	625079487	625081842	TRITD6Bv1G199940.1	70 kDa heat shock protein
chr6B	625081562	625082135	TRITD6Bv1G199940.4	Glucose-6-phosphate exchanger SLC37A1
chr6B	625081913	625082787	TRITD6Bv1G199940.5	Heat shock 70 kDa protein
chr6B	625085826	625086668	TRITD6Bv1G199950.1	3-deoxy-manno-octulosonate cytidylyltransferase
chr6B	625096190	625096447	TRITD6Bv1G199960.1	Heat shock 70 kDa protein
chr6B	625147701	625148003	TRITD6Bv1G199970.1	Retrotransposon protein, putative, Ty3-gypsy subclass
chr6B	625218806	625221127	TRITD6Bv1G199980.1	70 kDa heat shock protein
chr6B	625233717	625234679	TRITD6Bv1G199990.1	Retrovirus-related Pol polyprotein from transposon TNT 1-94
chr6B	625256988	625257386	TRITD6Bv1G200000.1	abscisic aldehyde oxidase 3
chr6B	625309660	625309980	TRITD6Bv1G200010.1	wound-responsive family protein
chr6B	625311492	625311833	TRITD6Bv1G200020.3	Glutamyl-tRNA(Gln) amidotransferase subunit C, chloroplastic/mitochondrial
chr6B	625330636	625333917	TRITD6Bv1G200030.1	70 kDa heat shock protein
chr6B	625330636	625333917	TRITD6Bv1G200030.2	70 kDa heat shock protein
chr6B	625330896	625331198	TRITD6Bv1G200030.3	Self-incompatibility locus early-flowering 3
chr6B	625331430	625331645	TRITD6Bv1G200030.4	plant UBX domain-containing protein 2
chr6B	625378630	625379319	TRITD6Bv1G200040.1	Retrovirus-related Pol polyprotein from transposon TNT 1-94
chr6B	625385034	625385513	TRITD6Bv1G200050.1	Retrotransposon protein, putative, Ty1-copia subclass
chr6B	625390925	625391322	TRITD6Bv1G200060.1	DNA-directed RNA polymerase subunit beta
chr6B	625400803	625401258	TRITD6Bv1G200070.1	Retrovirus-related Pol polyprotein from transposon TNT 1-94
chr6B	625435502	625435933	TRITD6Bv1G200080.1	RNA helicase family protein
chr6B	625436484	625437488	TRITD6Bv1G200090.1	Transposon protein, putative, mutator sub-class
chr6B	625445433	625445993	TRITD6Bv1G200100.1	multidrug resistance-associated protein 2
chr6B	625447844	625448143	TRITD6Bv1G200110.1	WRKY family transcription factor
chr6B	625455522	625498649	TRITD6Bv1G200120.7	Phosphoinositide phosphatase family protein
chr6B	625504536	625504883	TRITD6Bv1G200130.1	NAD/NADP-dependent betaine aldehyde dehydrogenase
chr6B	625550803	625556356	TRITD6Bv1G200140.1	RabGAP/TBC domain-containing protein
chr6B	625559028	625559756	TRITD6Bv1G200150.1	Retrovirus-related Pol polyprotein from transposon TNT 1-94
chr6B	625597770	625598078	TRITD6Bv1G200160.1	Transposable element protein, putative, Retrotrans_gag
chr6B	625600336	625600638	TRITD6Bv1G200170.1	K-box region and MADS-box transcription factor family protein
chr6B	625613696	625614283	TRITD6Bv1G200180.1	PH domain leucine-rich repeat-containing protein phosphatase 1
chr6B	625626684	625627817	TRITD6Bv1G200190.1	Glycosyltransferase
chr6B	625667108	625667575	TRITD6Bv1G200200.1	transmembrane protein
chr6B	625784252	625784707	TRITD6Bv1G200230.1	Retrotransposon protein, putative, unclassified
chr6B	625831777	625832727	TRITD6Bv1G200240.1	GDP-mannose 3,5-epimerase 1
chr6B	625866045	625866503	TRITD6Bv1G200250.1	Retrotransposon protein, putative, Ty3-gypsy subclass
chr6B	625873833	625874189	TRITD6Bv1G200260.1	Immunoglobulin superfamily member 1
chr6B	625874683	625875149	TRITD6Bv1G200270.1	Transposon protein, putative, Pong sub-class
chr6B	625875507	625875797	TRITD6Bv1G200270.5	condensin complex subunit
chr6B	625875606	625875797	TRITD6Bv1G200270.6	Condensin complex subunit 2
chr6B	625942998	625943507	TRITD6Bv1G200280.1	Retrotransposon protein, putative, unclassified
chr6B	625975500	625975805	TRITD6Bv1G200290.1	Reverse transcriptase
chr6B	626013504	626014611	TRITD6Bv1G200330.1	2,3-bisphosphoglycerate-dependent phosphoglycerate mutase
chr6B	626024585	626025151	TRITD6Bv1G200340.1	Ribonuclease H-like superfamily protein
chr6B	626026022	626026522	TRITD6Bv1G200350.1	protein VARIATION IN COMPOUND TRIGGERED ROOT growth protein
chr6B	626048667	626049044	TRITD6Bv1G200360.1	NAD(P)-binding Rossmann-fold superfamily protein
chr6B	626052107	626062549	TRITD6Bv1G200370.1	Delta(14)-sterol reductase
chr6B	626066162	626067978	TRITD6Bv1G200380.2	Glycosyltransferase
chr6B	626079781	626080137	TRITD6Bv1G200390.1	Transposon protein, putative, CACTA, En/Spm sub-class
chr6B	626086050	626086646	TRITD6Bv1G200400.1	Transposon protein, putative, CACTA, En/Spm sub-class
chr6B	626086679	626087123	TRITD6Bv1G200410.1	L-lactate dehydrogenase 2
chr6B	626089421	626091547	TRITD6Bv1G200420.1	MATH domain/coiled-coil protein
chr6B	626089759	626091547	TRITD6Bv1G200420.2	Sodium/potassium/calcium exchanger 3
chr6B	626214233	626214538	TRITD6Bv1G200450.1	Protein kinase family protein
chr6B	626222831	626223274	TRITD6Bv1G200460.1	4-hydroxy-3-methylbut-2-en-1-yl diphosphate synthase (flavodoxin)
chr6B	626223247	626225249	TRITD6Bv1G200460.2	Deoxyuridine 5'-triphosphate nucleotidohydrolase
chr6B	626230517	626230849	TRITD6Bv1G200470.1	Transcription factor GTE9
chr6B	626231142	626267975	TRITD6Bv1G200480.1	Transcription factor GTE10
chr6B	626258938	626259548	TRITD6Bv1G200490.1	4-hydroxy-3-methylbut-2-en-1-yl diphosphate synthase (flavodoxin)
chr6B	626258938	626261357	TRITD6Bv1G200490.2	Deoxyuridine 5'-triphosphate nucleotidohydrolase
chr6B	626382500	626382826	TRITD6Bv1G200500.1	Retrotransposon protein, putative, unclassified
chr6B	626401820	626402158	TRITD6Bv1G200510.1	DNA-directed RNA polymerase subunit beta, putative (DUF630 and DUF632)
chr6B	626427034	626429854	TRITD6Bv1G200520.1	Ethylene-responsive transcription factor
chr6B	626494941	626495243	TRITD6Bv1G200530.1	Transposon protein, putative, CACTA, En/Spm sub-class
chr6B	626538174	626539915	TRITD6Bv1G200540.1	trehalose-6-phosphate synthase
chr6B	626539307	626541430	TRITD6Bv1G200540.2	plant/protein
chr6B	626539775	626541430	TRITD6Bv1G200540.4	60S ribosomal protein L15
chr6B	626540980	626541318	TRITD6Bv1G200540.8	Starch synthase, chloroplastic/amyloplastic
chr6B	626573354	626573941	TRITD6Bv1G200550.1	Retrotransposon protein, putative, Ty3-gypsy subclass
chr6B	626700589	626700999	TRITD6Bv1G200570.1	Retrotransposon protein, putative, unclassified
chr6B	626705857	626706222	TRITD6Bv1G200580.1	Retrovirus-related Pol polyprotein from transposon TNT 1-94
chr6B	626753199	626754212	TRITD6Bv1G200590.1	Transposon protein, putative, CACTA, En/Spm sub-class
chr6B	626915275	626915763	TRITD6Bv1G200600.1	Phosphatidylcholine translocator ABCB4
chr6B	626943354	626943686	TRITD6Bv1G200610.1	Acyl-CoA-binding protein
chr6B	627109472	627110622	TRITD6Bv1G200640.1	Ethylene-responsive transcription factor
chr6B	627126340	627126921	TRITD6Bv1G200650.1	Transposon protein, putative, CACTA, En/Spm sub-class
chr6B	627146968	627147306	TRITD6Bv1G200660.1	tRNA-specific 2-thiouridylase MnmA
chr6B	627200656	627203523	TRITD6Bv1G200680.1	Ethylene-responsive transcription factor
chr6B	627226664	627226996	TRITD6Bv1G200700.1	Reverse transcriptase
chr6B	627245216	627245521	TRITD6Bv1G200720.1	Reverse transcriptase
chr6B	627246135	627246467	TRITD6Bv1G200730.1	Retrovirus-related Pol polyprotein from transposon TNT 1-94
chr6B	627271187	627271522	TRITD6Bv1G200740.1	Transposon protein, putative, CACTA, En/Spm sub-class
chr6B	627277801	627288317	TRITD6Bv1G200750.7	Protein TONSOKU
chr6B	627301190	627301669	TRITD6Bv1G200760.1	alpha/beta-Hydrolases superfamily protein
chr6B	627343781	627344383	TRITD6Bv1G200770.1	HAT transposon superfamily
chr6B	627362424	627362741	TRITD6Bv1G200780.1	Retrovirus-related Pol polyprotein from transposon TNT 1-94
chr6B	627382086	627382889	TRITD6Bv1G200800.1	HAT transposon superfamily
chr6B	627410160	627411435	TRITD6Bv1G200810.1	E3 ubiquitin-protein ligase
chr6B	627530296	627531442	TRITD6Bv1G200820.1	Serine/threonine-protein phosphatase 7 long form like
chr6B	627644252	627644578	TRITD6Bv1G200830.1	transmembrane protein (Protein of unknown function DUF2359, transmembrane)
chr6B	627682482	627682883	TRITD6Bv1G200840.1	Retrotransposon protein, putative, unclassified
chr6B	627721323	627721826	TRITD6Bv1G200850.1	Retrotransposon protein, putative, Ty3-gypsy subclass
chr6B	627723019	627723327	TRITD6Bv1G200860.1	Isocitrate lyase 2
chr6B	627811997	627812302	TRITD6Bv1G200870.1	L-amino-acid oxidase (Fragments)
chr6B	627880272	627880574	TRITD6Bv1G200900.1	Retrotransposon protein, putative, Ty1-copia subclass
chr6B	627940134	627940511	TRITD6Bv1G200910.1	mitogen-activated protein kinase kinase kinase 3
chr6B	627943760	627944275	TRITD6Bv1G200920.1	Transposon Ty3-I Gag-Pol polyprotein
chr6B	627944441	627944902	TRITD6Bv1G200930.1	Peroxisomal acyl-coenzyme A oxidase 1
chr6B	627944942	627945346	TRITD6Bv1G200940.1	Transposable element protein, putative
chr6B	627945355	627945711	TRITD6Bv1G200950.1	Transposable element protein, putative, Retrotrans_gag
chr6B	627948917	627949309	TRITD6Bv1G200960.1	Retrovirus-related Pol polyprotein from transposon TNT 1-94
chr6B	627957592	627958755	TRITD6Bv1G200970.1	E3 ubiquitin-protein ligase
chr6B	627972237	627984605	TRITD6Bv1G200980.1	stromal ascorbate peroxidase
chr6B	628006656	628007288	TRITD6Bv1G200990.1	Transposon protein, putative, Mutator sub-class, expressed
chr6B	628012092	628012427	TRITD6Bv1G201000.1	Cytochrome P450
chr6B	628019623	628020073	TRITD6Bv1G201010.1	Membrane protein of er body-like protein
chr6B	628088044	628089396	TRITD6Bv1G201040.1	Mitochondrial escape protein 2-1
chr6B	628093657	628094028	TRITD6Bv1G201050.1	Pol polyprotein
chr6B	628107697	628108119	TRITD6Bv1G201060.1	Transposon Ty3-I Gag-Pol polyprotein
chr6B	628114854	628115210	TRITD6Bv1G201070.1	Transcription regulators,zinc ion binding, putative isoform 2
chr6B	628127604	628142099	TRITD6Bv1G201080.1	Chaperone DnaJ-domain superfamily protein
chr6B	628134182	628135246	TRITD6Bv1G201090.1	Protein FAR1-RELATED SEQUENCE 5
chr6B	628140455	628141006	TRITD6Bv1G201100.1	Arginine--tRNA ligase
chr6B	628144154	628144477	TRITD6Bv1G201110.1	ATP binding cassette subfamily B4
chr6B	628149062	628164780	TRITD6Bv1G201120.1	Pectinesterase
chr6B	628149177	628149485	TRITD6Bv1G201130.1	glutathione S-transferase PHI 2
chr6B	628149177	628150623	TRITD6Bv1G201130.2	Phosphatidylinositol 4-kinase type 2-beta
chr6B	628149177	628154337	TRITD6Bv1G201130.3	CENP-C
chr6B	628164382	628164780	TRITD6Bv1G201120.2	Pectinesterase
chr6B	628164777	628166532	TRITD6Bv1G201120.3	Pectinesterase
chr6B	628164777	628166532	TRITD6Bv1G201120.4	Pectinesterase
chr6B	628196955	628197251	TRITD6Bv1G201140.1	Retrovirus-related Pol polyprotein from transposon TNT 1-94
chr6B	628197870	628198229	TRITD6Bv1G201150.1	basic helix-loop-helix (bHLH) DNA-binding superfamily protein
chr6B	628208609	628208995	TRITD6Bv1G201160.1	Retrotransposon protein, putative, unclassified
chr6B	628278802	628282023	TRITD6Bv1G201170.1	Pectinesterase
chr6B	628284108	628285730	TRITD6Bv1G201180.1	Mitochondrial transcription termination factor
chr6B	628340109	628340738	TRITD6Bv1G201190.1	Transposon protein, putative, CACTA, En/Spm sub-class
chr6B	628359639	628368122	TRITD6Bv1G201220.9	Lysine ketoglutarate reductase/saccharopine dehydrogenase
chr6B	628371795	628372406	TRITD6Bv1G201230.1	Retrovirus-related Pol polyprotein from transposon TNT 1-94
chr6B	628376069	628378167	TRITD6Bv1G201240.2	Alpha-aminoadipic semialdehyde synthase
chr6B	628460115	628461032	TRITD6Bv1G201250.1	Retrovirus-related Pol polyprotein from transposon TNT 1-94
chr6B	628500564	628500863	TRITD6Bv1G201260.1	Retrotransposon protein, putative, unclassified
chr6B	628559044	628559250	TRITD6Bv1G201270.1	2,3-bisphosphoglycerate-dependent phosphoglycerate mutase
chr6B	628559238	628561660	TRITD6Bv1G201270.2	cytochrome P450, family 708, subfamily A, polypeptide 2
chr6B	628562486	628563288	TRITD6Bv1G201280.1	Pullulanase-type starch debranching enzyme
chr6B	628562535	628563210	TRITD6Bv1G201280.2	Pullulanase 1, chloroplastic
chr6B	628563802	628564309	TRITD6Bv1G201290.1	Pullulanase
chr6B	628634971	628635576	TRITD6Bv1G201300.1	Pol polyprotein
chr6B	628646053	628646415	TRITD6Bv1G201310.1	Retrotransposon protein, putative, Ty1-copia subclass
chr6B	628722930	628723247	TRITD6Bv1G201340.1	Transposon protein, putative, CACTA, En/Spm sub-class
chr6B	628738863	628739198	TRITD6Bv1G201350.1	Retrovirus-related Pol polyprotein from transposon TNT 1-94
chr6B	628759954	628766382	TRITD6Bv1G201380.1	Pyrophosphate-energized vacuolar membrane proton pump
chr6B	628767281	628770765	TRITD6Bv1G201390.2	26S protease regulatory subunit
chr6B	628771259	628772359	TRITD6Bv1G201400.2	Hexosyltransferase
chr6B	628774592	628775902	TRITD6Bv1G201410.1	Protein ETHYLENE INSENSITIVE 3
chr6B	628776108	628776413	TRITD6Bv1G201420.1	ZIP metal ion transporter family
chr6B	628790372	628790863	TRITD6Bv1G201430.1	Retrovirus-related Pol polyprotein from transposon TNT 1-94
chr6B	628797436	628797747	TRITD6Bv1G201440.1	Membrane protein insertase YidC
chr6B	628810336	628810761	TRITD6Bv1G201450.1	Retrotransposon protein, putative, Ty3-gypsy subclass
chr6B	628821244	628821807	TRITD6Bv1G201460.1	Retrotransposon protein, putative, Ty3-gypsy subclass
chr6B	628843470	628843787	TRITD6Bv1G201470.1	Apocytochrome f
chr6B	628900814	628918712	TRITD6Bv1G201480.1	Translation initiation factor IF-2
chr6B	628926519	628926746	TRITD6Bv1G201490.1	Retrovirus-related Pol polyprotein from transposon TNT 1-94
chr6B	628945098	628945403	TRITD6Bv1G201500.1	DNA-directed RNA polymerase II subunit RPB1
chr6B	628986534	628986866	TRITD6Bv1G201510.1	Retrotransposon protein, putative, unclassified
chr6B	628987745	628988131	TRITD6Bv1G201520.1	Retrotransposon protein, putative, Ty3-gypsy subclass
chr6B	628998740	628999144	TRITD6Bv1G201530.1	Transposon Ty3-I Gag-Pol polyprotein
chr6B	629003690	629004247	TRITD6Bv1G201540.1	RNA-binding (RRM/RBD/RNP motifs) family protein
chr6B	629005723	629006049	TRITD6Bv1G201550.1	NADH-quinone oxidoreductase subunit B
chr6B	629127699	629127995	TRITD6Bv1G201560.1	Retrotransposon protein, putative, unclassified
chr6B	629324337	629325155	TRITD6Bv1G201570.1	Retrovirus-related Pol polyprotein from transposon TNT 1-94
chr6B	629326392	629327042	TRITD6Bv1G201580.1	Retrovirus-related Pol polyprotein from transposon TNT 1-94
chr6B	629330437	629330974	TRITD6Bv1G201590.1	60S ribosomal protein L35a-like protein
chr6B	629333936	629334394	TRITD6Bv1G201600.1	Histone H2B
chr6B	629337810	629346061	TRITD6Bv1G201610.2	Anaphase-promoting complex subunit 4
chr6B	629372710	629373270	TRITD6Bv1G201640.1	Transposon Ty3-I Gag-Pol polyprotein
chr6B	629398695	629399057	TRITD6Bv1G201650.1	Retrotransposon protein, putative, unclassified
chr6B	629432469	629433128	TRITD6Bv1G201660.1	Retrotransposon protein, putative, Ty3-gypsy subclass
chr6B	629513319	629515459	TRITD6Bv1G201690.1	lysine ketoglutarate reductase trans-splicing-like protein, putative (DUF707)
chr6B	629520316	629520939	TRITD6Bv1G201700.1	ARM repeat superfamily protein
chr6B	629521838	629522158	TRITD6Bv1G201710.1	wall associated kinase 3
chr6B	629544636	629544944	TRITD6Bv1G201720.1	MAP kinase-activating death domain protein
chr6B	629562044	629562343	TRITD6Bv1G201730.1	Retrotransposon protein, putative, Ty3-gypsy subclass
chr6B	629612733	629613047	TRITD6Bv1G201740.1	Retrotransposon protein, putative, unclassified
chr6B	629666002	629675000	TRITD6Bv1G201750.2	Quinoprotein amine dehydrogenase, beta chain-like RIC1-like guanyl-nucleotide exchange factor
chr6B	629703877	629704245	TRITD6Bv1G201760.1	Retrovirus-related Pol polyprotein from transposon TNT 1-94
chr6B	629719427	629720106	TRITD6Bv1G201770.1	abscisic acid responsive element-binding factor 1
chr6B	629721712	629722198	TRITD6Bv1G201780.1	Guanine nucleotide exchange factor SDC25
chr6B	629782220	629782528	TRITD6Bv1G201830.1	Retrotransposon protein, putative, Ty1-copia subclass
chr6B	629782534	629783118	TRITD6Bv1G201840.1	Gag-pol polyprotein
chr6B	629820155	629820514	TRITD6Bv1G201850.1	Retrovirus-related Pol polyprotein from transposon TNT 1-94
chr6B	629824874	629825341	TRITD6Bv1G201860.1	Transposable element protein, putative, Retrotrans_gag
chr6B	629861608	629862294	TRITD6Bv1G201870.1	Retrotransposon protein, putative, unclassified
chr6B	629863558	629864387	TRITD6Bv1G201880.1	F-box family protein
chr6B	629864520	629864903	TRITD6Bv1G201890.1	Oxidoreductase-like domain-containing protein 1
chr6B	629970219	629972456	TRITD6Bv1G201940.1	MYB-related transcription factor
chr6B	629981215	629986810	TRITD6Bv1G201950.1	Protein kinase-like
chr6B	630024502	630024870	TRITD6Bv1G201960.1	NAD(P)H-quinone oxidoreductase subunit 2, chloroplastic
chr6B	630038024	630038392	TRITD6Bv1G201970.1	2-nonaprenyl-3-methyl-6-methoxy-1,4-benzoquinol hydroxylase
chr6B	630071725	630072036	TRITD6Bv1G201980.1	Retrotransposon protein, putative, Ty3-gypsy subclass
chr6B	630108616	630108942	TRITD6Bv1G202000.1	Gag-pol polyprotein
chr6B	630111453	630111899	TRITD6Bv1G202010.1	Retrovirus-related Pol polyprotein from transposon TNT 1-94
chr6B	630133236	630133550	TRITD6Bv1G202020.1	Retrotransposon protein, putative, Ty3-gypsy subclass
chr6B	630143528	630143869	TRITD6Bv1G202030.1	Myosin phosphatase Rho-interacting protein
chr6B	630155683	630155997	TRITD6Bv1G202040.1	Transposon protein, putative, CACTA, En/Spm sub-class
chr6B	630286140	630287150	TRITD6Bv1G202050.1	Adhesion G protein-coupled receptor L3
chr6B	630320986	630321378	TRITD6Bv1G202060.1	DNA topoisomerase 2
chr6B	630322593	630323081	TRITD6Bv1G202070.1	glucose-6-phosphate dehydrogenase 5
chr6B	630324650	630325183	TRITD6Bv1G202080.1	Pathogenesis-related protein 1
chr6B	630345816	630347564	TRITD6Bv1G202090.1	F-box family protein
chr6B	630356049	630356690	TRITD6Bv1G202100.1	Pathogenesis-related protein 1-1
chr6B	630392884	630393252	TRITD6Bv1G202130.1	phosphatidyl inositol monophosphate 5 kinase
chr6B	630394386	630394751	TRITD6Bv1G202140.1	Calcium-binding EF-hand family protein
chr6B	630413360	630415131	TRITD6Bv1G202150.1	Carboxyl methyltransferase
chr6B	630442053	630448727	TRITD6Bv1G202160.9	Telomeric repeat-binding factor 1
chr6B	630449712	630452162	TRITD6Bv1G202170.1	transmembrane protein, putative (DUF594)
chr6B	630452447	630452758	TRITD6Bv1G202180.1	Nuclear transport factor 2 (NTF2) family protein with RNA binding (RRM-RBD-RNP motifs) domain-containing protein
chr6B	630457442	630457813	TRITD6Bv1G202190.1	Transposable element protein, putative, Retrotrans_gag
chr6B	630458932	630459234	TRITD6Bv1G202200.1	Transposon Ty3-I Gag-Pol polyprotein
chr6B	630462519	630462842	TRITD6Bv1G202210.1	V-type ATP synthase subunit E
chr6B	630466267	630466602	TRITD6Bv1G202220.1	Glycosylphosphatidylinositol anchor attachment 1 protein
chr6B	630477096	630477569	TRITD6Bv1G202230.1	Retrovirus-related Pol polyprotein from transposon TNT 1-94
chr6B	630526197	630526559	TRITD6Bv1G202240.1	Peptide chain release factor 3
chr6B	630534893	630536006	TRITD6Bv1G202250.2	Cysteine protease, putative
chr6B	630540396	630540894	TRITD6Bv1G202260.1	Transmembrane protein 14C
chr6B	630547048	630547557	TRITD6Bv1G202270.1	Copia-like polyprotein
chr6B	630551168	630551614	TRITD6Bv1G202280.1	Histone-lysine N-methyltransferase NSD2
chr6B	630561614	630563907	TRITD6Bv1G202290.1	RING/U-box superfamily protein
chr6B	630562263	630563514	TRITD6Bv1G202290.4	E3 ubiquitin-protein ligase
chr6B	630592568	630594177	TRITD6Bv1G202300.1	Sentrin-specific protease
chr6B	630597875	630599257	TRITD6Bv1G202310.1	Retrovirus-related Pol polyprotein from transposon TNT 1-94
chr6B	630631616	630631954	TRITD6Bv1G202320.1	Protein FAR1-RELATED SEQUENCE 5
chr6B	630638669	630639085	TRITD6Bv1G202330.1	Microtubule-associated protein RP/EB family member 1
chr6B	630647094	630647573	TRITD6Bv1G202340.1	Ubiquitin carboxyl-terminal hydrolase-related protein
chr6B	630647440	630648204	TRITD6Bv1G202340.2	Exodeoxyribonuclease 7 large subunit
chr6B	630672350	630672724	TRITD6Bv1G202350.1	Reverse transcriptase
chr6B	630675469	630675798	TRITD6Bv1G202360.1	sucrose-6F-phosphate phosphohydrolase 2
chr6B	630675732	630676334	TRITD6Bv1G202360.2	D-alanine--D-alanine ligase
chr6B	630681546	630682430	TRITD6Bv1G202370.1	Transposon protein, putative, CACTA, En/Spm sub-class
chr6B	630842807	630843229	TRITD6Bv1G202380.1	Retrotransposon protein, putative, Ty3-gypsy subclass
chr6B	630881456	630882001	TRITD6Bv1G202390.1	Retrovirus-related Pol polyprotein from transposon TNT 1-94
chr6B	630887847	630890227	TRITD6Bv1G202400.1	disease resistance protein (TIR-NBS-LRR class) family
chr6B	630921985	630922568	TRITD6Bv1G202410.1	Vacuolar protein sorting-associated protein 9A
chr6B	630931068	630931550	TRITD6Bv1G202420.1	Pol polyprotein
chr6B	630932427	630932930	TRITD6Bv1G202430.1	Retrovirus-related Pol polyprotein from transposon opus
chr6B	630940984	630941478	TRITD6Bv1G202440.1	zinc finger CCCH domain protein
chr6B	630956909	630957214	TRITD6Bv1G202450.1	O-Glycosyl hydrolases family 17 protein
chr6B	630985845	630986189	TRITD6Bv1G202460.1	nuclear pore complex protein (DUF3414)
chr6B	631037647	631038093	TRITD6Bv1G202470.1	Cysteine protease, putative
chr6B	631049936	631050787	TRITD6Bv1G202480.1	Leucine--tRNA ligase
chr6B	631051089	631052315	TRITD6Bv1G202490.1	Ubiquitin carboxyl-terminal hydrolase 2
chr6B	631054057	631055170	TRITD6Bv1G202500.3	Cysteine protease, putative
chr6B	631079180	631079491	TRITD6Bv1G202510.1	Transposable element protein, putative, Retrotrans_gag
chr6B	631087318	631087986	TRITD6Bv1G202520.1	Pol polyprotein
chr6B	631089262	631089639	TRITD6Bv1G202530.1	Pol polyprotein
chr6B	631107294	631107671	TRITD6Bv1G202540.1	Retrotransposon protein, putative, unclassified
chr6B	631127047	631127493	TRITD6Bv1G202550.2	Cysteine protease, putative
chr6B	631169956	631170480	TRITD6Bv1G202560.1	Pol polyprotein
chr6B	631192813	631195497	TRITD6Bv1G202570.1	transmembrane protein, putative (DUF594)
chr6B	631197490	631198602	TRITD6Bv1G202580.1	Cysteine protease, putative
chr6B	631213199	631214310	TRITD6Bv1G202590.1	Cysteine protease, putative
chr6B	631219921	631220190	TRITD6Bv1G202600.1	Transposon protein, putative, Pong sub-class
chr6B	631224257	631226024	TRITD6Bv1G202610.1	RING/U-box superfamily protein
chr6B	631312432	631313394	TRITD6Bv1G202620.1	Retrovirus-related Pol polyprotein from transposon TNT 1-94
chr6B	631329886	631330188	TRITD6Bv1G202630.1	S-adenosyl-L-methionine-dependent methyltransferases superfamily protein
chr6B	631379338	631379652	TRITD6Bv1G202640.1	Retrotransposon protein, putative, unclassified
chr6B	631383021	631383815	TRITD6Bv1G202650.1	Retrotransposon protein, putative, unclassified
chr6B	631402542	631402865	TRITD6Bv1G202660.1	Retrovirus-related Pol polyprotein from transposon TNT 1-94
chr6B	631412555	631413106	TRITD6Bv1G202670.1	Retrotransposon protein, putative, Ty3-gypsy subclass
chr6B	631504782	631505327	TRITD6Bv1G202680.1	Retrovirus-related Pol polyprotein from transposon TNT 1-94
chr6B	631506705	631507193	TRITD6Bv1G202690.1	Retrovirus-related Pol polyprotein from transposon TNT 1-94
chr6B	631510481	631511020	TRITD6Bv1G202700.1	Retrotransposon protein, putative, Ty3-gypsy subclass
chr6B	631863802	631864155	TRITD6Bv1G202750.1	Transposon protein, putative, CACTA, En/Spm sub-class
chr6B	631941380	631942085	TRITD6Bv1G202780.1	Transposon protein, putative, CACTA, En/Spm sub-class
chr6B	631941380	631942326	TRITD6Bv1G202780.2	Transposon protein, putative, CACTA, En/Spm sub-class
chr6B	631941720	631942243	TRITD6Bv1G202780.3	P-loop containing nucleoside triphosphate hydrolases superfamily protein
chr6B	631949304	631949828	TRITD6Bv1G202790.1	Arabinose operon regulatory protein
chr6B	631949590	631950708	TRITD6Bv1G202800.1	Protein kinase
chr6B	631981363	631982950	TRITD6Bv1G202810.1	disease resistance protein (TIR-NBS-LRR class)
chr6B	631982929	631983321	TRITD6Bv1G202810.2	disease resistance protein (TIR-NBS-LRR class)
chr6B	631983343	631983828	TRITD6Bv1G202820.1	Powdery mildew resistance protein Pm3
chr6B	631984089	631985338	TRITD6Bv1G202830.1	NBS-LRR disease resistance protein
chr6B	631985316	631986238	TRITD6Bv1G202830.2	NBS-LRR-like resistance protein
chr6B	631993507	631995094	TRITD6Bv1G202840.1	Transposon protein, putative, CACTA, En/Spm sub-class, expressed
chr6B	632060308	632069577	TRITD6Bv1G202870.1	HTH-type transcriptional regulator MalT
chr6B	632072481	632075122	TRITD6Bv1G202880.1	Kinase
chr6B	632075884	632079714	TRITD6Bv1G202890.1	Alpha/beta-hydrolase superfamily protein
chr6B	632085157	632085528	TRITD6Bv1G202900.1	Cytochrome c biogenesis ATP-binding export protein CcmA
chr6B	632114528	632115067	TRITD6Bv1G202910.1	Pathogenesis-related protein 1
chr6B	632133944	632134441	TRITD6Bv1G202920.1	Retrovirus-related Pol polyprotein from transposon TNT 1-94
chr6B	632193200	632193784	TRITD6Bv1G202930.1	Cysteine protease
chr6B	632193869	632194315	TRITD6Bv1G202940.1	Cysteine protease, putative
chr6B	632281122	632281688	TRITD6Bv1G202950.1	Retrotransposon protein, putative, Ty3-gypsy subclass
chr6B	632304957	632305301	TRITD6Bv1G202990.1	SEC14 cytosolic factor family protein / phosphoglyceride transfer family protein
chr6B	632328092	632328427	TRITD6Bv1G203020.1	Transposable element protein, putative
chr6B	632371355	632372113	TRITD6Bv1G203030.1	Pol polyprotein
chr6B	632396014	632397127	TRITD6Bv1G203040.2	Cysteine protease, putative
chr6B	632404134	632407059	TRITD6Bv1G203050.1	Sugar transporter family protein, expressed
chr6B	632408302	632408787	TRITD6Bv1G203060.1	Translation initiation factor IF-2
chr6B	632409289	632409765	TRITD6Bv1G203070.1	transducin family protein / WD-40 repeat family protein
chr6B	632457403	632457732	TRITD6Bv1G203110.1	Retrotransposon protein, putative, unclassified
chr6B	632474938	632475525	TRITD6Bv1G203120.1	Myb-like transcription factor-like
chr6B	632592617	632593025	TRITD6Bv1G203160.1	2-oxoglutarate (2OG) and Fe(II)-dependent oxygenase superfamily protein
chr6B	632593774	632594091	TRITD6Bv1G203170.1	tRNA-specific 2-thiouridylase MnmA
chr6B	632617358	632617903	TRITD6Bv1G203180.1	NFX1-type zinc finger-containing protein 1
chr6B	632654757	632658685	TRITD6Bv1G203190.1	Glutamate receptor
chr6B	632656289	632656965	TRITD6Bv1G203200.1	tonoplast monosaccharide transporter2
chr6B	632994128	632994541	TRITD6Bv1G203210.1	Retrotransposon protein, putative, Ty3-gypsy subclass
chr6B	633201492	633209370	TRITD6Bv1G203240.1	Glutamate receptor
chr6B	633226326	633226904	TRITD6Bv1G203250.1	Glutamate receptor
chr6B	633234184	633234507	TRITD6Bv1G203260.1	Transposon TX1 uncharacterized
chr6B	633236292	633236621	TRITD6Bv1G203270.1	Cortactin-binding protein 2
chr6B	633237288	633237713	TRITD6Bv1G203280.1	L-threonine 3-dehydrogenase
chr6B	633253029	633253610	TRITD6Bv1G203290.1	Retrotransposon protein, putative, Ty3-gypsy subclass
chr6B	633272126	633272455	TRITD6Bv1G203300.1	3-isopropylmalate dehydratase large subunit
chr6B	633371040	633373440	TRITD6Bv1G203310.5	Protein FLX-like 2
chr6B	633469723	633470277	TRITD6Bv1G203320.1	Retrovirus-related Pol polyprotein from transposon TNT 1-94
chr6B	633470728	633471051	TRITD6Bv1G203330.1	Retrovirus-related Pol polyprotein from transposon TNT 1-94
chr6B	633505926	633510962	TRITD6Bv1G203340.1	Cycloeucalenol cycloisomerase
chr6B	633517463	633518134	TRITD6Bv1G203350.1	Exocyst complex component, putative
chr6B	633518286	633518957	TRITD6Bv1G203360.1	Exo70 exocyst complex subunit family protein
chr6B	633538322	633539727	TRITD6Bv1G203370.1	DNA ligase 1
chr6B	633612640	633619304	TRITD6Bv1G203400.1	Diacylglycerol kinase
chr6B	633620078	633625091	TRITD6Bv1G203410.1	Glutamate receptor
chr6B	633621892	633622113	TRITD6Bv1G203420.1	Tetraacyldisaccharide 4'-kinase
chr6B	633747571	633747906	TRITD6Bv1G203430.1	Retrotransposon protein, putative, Ty1-copia subclass
chr6B	633818673	633819041	TRITD6Bv1G203460.1	Retrotransposon protein, putative, Ty3-gypsy subclass
chr6B	633823031	633823852	TRITD6Bv1G203480.1	Deoxyuridine 5'-triphosphate nucleotidohydrolase
chr6B	633823424	633823997	TRITD6Bv1G203480.6	DNAJ heat shock N-terminal domain-containing protein
chr6B	633848243	633850618	TRITD6Bv1G203490.1	Eukaryotic translation initiation factor 3 subunit G
chr6B	633861874	633864902	TRITD6Bv1G203500.3	Chaperone protein clpB
chr6B	633881675	633904863	TRITD6Bv1G203510.1	Amino acid transporter family protein
chr6B	633967371	633968276	TRITD6Bv1G203560.1	Transposable element protein, putative, Retrotrans_gag
chr6B	634104939	634105286	TRITD6Bv1G203590.1	Retrotransposon protein, putative, Ty3-gypsy subclass
chr6B	634105290	634105601	TRITD6Bv1G203600.1	pentatricopeptide (PPR) repeat-containing protein
chr6B	634137468	634138127	TRITD6Bv1G203610.1	Retrotransposon protein, putative, Ty3-gypsy subclass
chr6B	634193957	634194907	TRITD6Bv1G203620.1	Omega-6 fatty acid desaturase, endoplasmic reticulum isozyme 2
chr6B	634194880	634195296	TRITD6Bv1G203620.2	UvrABC system protein B
chr6B	634265904	634266299	TRITD6Bv1G203650.1	Retrotransposon protein, putative, Ty3-gypsy subclass
chr6B	634333055	634337835	TRITD6Bv1G203660.3	Amino acid transporter family protein
chr6B	634360535	634360945	TRITD6Bv1G203670.1	Transposon Ty3-G Gag-Pol polyprotein
chr6B	634361123	634361506	TRITD6Bv1G203680.1	Pol polyprotein
chr6B	634361667	634362506	TRITD6Bv1G203690.1	Gag-pol polyprotein
chr6B	634363006	634363722	TRITD6Bv1G203700.1	Transposon Ty3-G Gag-Pol polyprotein
chr6B	634373994	634374371	TRITD6Bv1G203710.1	Disease resistance protein (CC-NBS-LRR class) family
chr6B	634375290	634375817	TRITD6Bv1G203720.1	Transposon Ty3-G Gag-Pol polyprotein
chr6B	634375860	634376405	TRITD6Bv1G203730.1	Gag-Pol polyprotein
chr6B	634377906	634379075	TRITD6Bv1G203740.1	Pentafunctional AROM polypeptide
chr6B	634379409	634380866	TRITD6Bv1G203750.1	Retrotransposon protein, putative, Ty3-gypsy subclass
chr6B	634383232	634383597	TRITD6Bv1G203760.1	Cytochrome b
chr6B	634386597	634387088	TRITD6Bv1G203770.1	Galactomannan galactosyltransferase 1
chr6B	634388452	634390044	TRITD6Bv1G203780.1	Retrovirus-related Pol polyprotein from transposon TNT 1-94
chr6B	634390072	634392432	TRITD6Bv1G203790.1	Retrovirus-related Pol polyprotein from transposon TNT 1-94
chr6B	634406095	634407036	TRITD6Bv1G203800.1	Histone-lysine N-methyltransferase family protein
chr6B	634406993	634408321	TRITD6Bv1G203800.5	sorting nexin 2B
chr6B	634406993	634408356	TRITD6Bv1G203800.6	sorting nexin 2B
chr6B	634407310	634407630	TRITD6Bv1G203810.1	Disease resistance protein (TIR-NBS-LRR class) family
chr6B	634407736	634408321	TRITD6Bv1G203800.7	vacuolar H+-pumping ATPase 16 kDa proteolipid subunit 4
chr6B	634407736	634408356	TRITD6Bv1G203800.8	vacuolar H+-pumping ATPase 16 kDa proteolipid subunit 4
chr6B	634425796	634427413	TRITD6Bv1G203820.1	Equilibrative nucleoside transporter
chr6B	634431633	634431992	TRITD6Bv1G203830.1	GMP synthase [glutamine-hydrolyzing]
chr6B	634503717	634504040	TRITD6Bv1G203840.1	ATP-dependent Clp protease proteolytic subunit
chr6B	634584068	634585362	TRITD6Bv1G203850.1	Retrovirus-related Pol polyprotein from transposon TNT 1-94
chr6B	634599974	634603477	TRITD6Bv1G203860.1	Cyclic nucleotide-gated channel
chr6B	634619292	634622587	TRITD6Bv1G203870.2	TVP38/TMEM64 family membrane protein
chr6B	634657872	634658234	TRITD6Bv1G203880.1	Retrovirus-related Pol polyprotein from transposon TNT 1-94
chr6B	634755562	634755861	TRITD6Bv1G203920.1	Disease resistance protein (TIR-NBS-LRR class)
chr6B	634831890	634832198	TRITD6Bv1G203930.1	spermidine synthase 3
chr6B	634955079	634981927	TRITD6Bv1G203970.2	Cyclic nucleotide-gated channel
chr6B	634985200	634985517	TRITD6Bv1G203980.1	Pecanex-like protein 2
chr6B	634987220	634989062	TRITD6Bv1G203990.1	Arginine/serine-rich splicing factor, putative
chr6B	635041215	635041517	TRITD6Bv1G204000.1	Eukaryotic translation initiation factor 3 subunit J
chr6B	635109935	635110504	TRITD6Bv1G204010.1	Gag-Pol polyprotein
chr6B	635118701	635119045	TRITD6Bv1G204020.1	Pol polyprotein
chr6B	635140988	635141524	TRITD6Bv1G204030.1	Transposon Ty3-I Gag-Pol polyprotein
chr6B	635146334	635146726	TRITD6Bv1G204040.1	Transcription regulators,zinc ion binding, putative isoform 3
chr6B	635172246	635172575	TRITD6Bv1G204050.1	Retrotransposon protein, putative, Ty3-gypsy subclass
chr6B	635263601	635264002	TRITD6Bv1G204060.1	U-box domain-containing protein 52
chr6B	635285510	635289469	TRITD6Bv1G204090.1	Cyclin family protein
chr6B	635291222	635293715	TRITD6Bv1G204100.1	RING/U-box superfamily protein
chr6B	635385673	635386134	TRITD6Bv1G204110.1	Retrotransposon protein, putative, Ty3-gypsy subclass
chr6B	635466562	635467377	TRITD6Bv1G204140.1	phosphotransferases/inositol or phosphatidylinositol kinase
chr6B	635520211	635520785	TRITD6Bv1G204150.1	Protein CYPRO4
chr6B	635523880	635525289	TRITD6Bv1G204160.2	Dehydrin
chr6B	635622610	635624971	TRITD6Bv1G204190.1	Protein DETOXIFICATION
chr6B	635622972	635624626	TRITD6Bv1G204190.2	plant intracellular ras group-related LRR 2
chr6B	635635355	635635999	TRITD6Bv1G204200.1	LINE-1 reverse transcriptase like
chr6B	635638043	635644400	TRITD6Bv1G204210.5	Protein DETOXIFICATION
chr6B	635638326	635638709	TRITD6Bv1G204220.1	Translation initiation factor IF-2
chr6B	635663980	635664291	TRITD6Bv1G204230.1	Retrovirus-related Pol polyprotein from transposon 17.6
chr6B	635664694	635665482	TRITD6Bv1G204240.1	Pol polyprotein
chr6B	635708516	635708713	TRITD6Bv1G204250.1	Hydroxylamine reductase
chr6B	635749743	635750090	TRITD6Bv1G204260.1	S-adenosylmethionine:tRNA ribosyltransferase-isomerase
chr6B	635749758	635750541	TRITD6Bv1G204270.1	Dehydrin
chr6B	635784612	635785772	TRITD6Bv1G204280.1	Cyclin F-box
chr6B	635814447	635814827	TRITD6Bv1G204320.1	Zinc knuckle containing protein-like
chr6B	635823385	635823975	TRITD6Bv1G204330.1	Dehydrin
chr6B	635862350	635862775	TRITD6Bv1G204350.1	ATP-dependent (S)-NAD(P)H-hydrate dehydratase
chr6B	635871096	635871395	TRITD6Bv1G204360.1	Retrotransposon protein, putative, unclassified
chr6B	635872684	635875955	TRITD6Bv1G204370.1	Pectinesterase
chr6B	635881400	635881762	TRITD6Bv1G204380.1	Protein FAR1-RELATED SEQUENCE 5
chr6B	635886804	635887127	TRITD6Bv1G204390.1	Unknown protein
chr6B	635888527	635892589	TRITD6Bv1G204400.1	SH3 and PX domain-containing protein 2B
chr6B	635899529	635900136	TRITD6Bv1G204410.1	Dehydrin
chr6B	635904123	635905643	TRITD6Bv1G204420.1	Leucine-rich repeat receptor-like protein kinase family protein
chr6B	635909259	635909900	TRITD6Bv1G204430.1	Kinase
chr6B	635923499	635935104	TRITD6Bv1G204440.5	Protein kinase, putative
chr6B	635935751	635936086	TRITD6Bv1G204450.1	cyclic nucleotide gated channel 3
chr6B	635958170	635958508	TRITD6Bv1G204460.1	Pentatricopeptide repeat (PPR) superfamily protein
chr6B	635971107	635971424	TRITD6Bv1G204470.1	Histone-arginine methyltransferase CARMER
chr6B	635972939	635973265	TRITD6Bv1G204480.1	S-locus F-box protein
chr6B	635973351	635973749	TRITD6Bv1G204490.1	Holliday junction ATP-dependent DNA helicase RuvA
chr6B	635976421	635980345	TRITD6Bv1G204500.1	Leucine-rich repeat receptor-like protein kinase family protein
chr6B	635988866	635989342	TRITD6Bv1G204510.1	Aspartate carbamoyltransferase
chr6B	635989494	635990105	TRITD6Bv1G204520.1	NAD--protein ADP-ribosyltransferase
chr6B	636023760	636027643	TRITD6Bv1G204530.1	Leucine-rich repeat receptor-like protein kinase family protein
chr6B	636049946	636051328	TRITD6Bv1G204540.1	LINE-1 reverse transcriptase like
chr6B	636080607	636080957	TRITD6Bv1G204550.1	heat shock protein 60-2
chr6B	636095530	636095736	TRITD6Bv1G204560.1	serine hydroxymethyltransferase 6
chr6B	636096033	636096419	TRITD6Bv1G204570.1	zinc finger MYM-type-like protein
chr6B	636096453	636097102	TRITD6Bv1G204580.1	TTF-type zinc finger protein with HAT dimerisation domain
chr6B	636106059	636108496	TRITD6Bv1G204590.1	HAT transposon superfamily
chr6B	636108689	636109392	TRITD6Bv1G204600.1	HAT family dimerisation domain containing protein
chr6B	636466056	636466847	TRITD6Bv1G204650.1	Pol polyprotein
chr6B	636489691	636490167	TRITD6Bv1G204660.1	Retrotransposon protein, putative, unclassified
chr6B	636503088	636506628	TRITD6Bv1G204670.2	Trehalose-6-phosphate synthase
chr6B	636618103	636618531	TRITD6Bv1G204680.1	acetoacetyl-CoA thiolase 2
chr6B	636728264	636749953	TRITD6Bv1G204710.1	Pentatricopeptide repeat-containing protein
chr6B	636772882	636773313	TRITD6Bv1G204720.1	DNA-directed RNA polymerase subunit beta'
chr6B	636805918	636806319	TRITD6Bv1G204730.1	Stigma-specific protein Stig1
chr6B	636823015	636823515	TRITD6Bv1G204740.1	Transposon protein, putative, CACTA, En/Spm sub-class
chr6B	636832526	636836766	TRITD6Bv1G204750.1	Sugar transporter, putative
chr6B	636872948	636881417	TRITD6Bv1G204760.8	Protein RFT1-like protein
chr6B	636886230	636886517	TRITD6Bv1G204770.1	Protein pelota
chr6B	636909437	636910062	TRITD6Bv1G204780.1	DNA topoisomerase
chr6B	636918340	636918669	TRITD6Bv1G204790.1	4-hydroxy-3-methylbut-2-enyl diphosphate reductase
chr6B	636944154	636948187	TRITD6Bv1G204810.1	Retrotransposon protein, putative, unclassified
chr6B	637066305	637066649	TRITD6Bv1G204820.1	Retrotransposon protein, putative, Ty3-gypsy subclass
chr6B	637075378	637076514	TRITD6Bv1G204830.1	Protein pelota homolog
chr6B	637196095	637196427	TRITD6Bv1G204920.1	Acetyl-coenzyme A synthetase, cytoplasmic
chr6B	637196440	637196775	TRITD6Bv1G204930.1	ELF4-like 2
chr6B	637223057	637223455	TRITD6Bv1G204940.1	Transcription regulators,zinc ion binding, putative isoform 2
chr6B	637242440	637243795	TRITD6Bv1G204950.1	RING finger protein
chr6B	637243527	637244024	TRITD6Bv1G204960.1	EKC/KEOPS complex subunit BUD32
chr6B	637262169	637283003	TRITD6Bv1G204970.1	Transcription factor jumonji (jmjC) domain-containing protein
chr6B	637262169	637283008	TRITD6Bv1G204970.2	Transcription factor jumonji (jmjC) domain-containing protein
chr6B	637378300	637378650	TRITD6Bv1G204980.1	Protein kinase superfamily protein
chr6B	637384460	637384846	TRITD6Bv1G204990.1	Retrotransposon protein, putative, Ty3-gypsy subclass
chr6B	637429471	637430148	TRITD6Bv1G205000.1	GS homeobox 2
chr6B	637429981	637431786	TRITD6Bv1G205000.2	Transcriptional repressor NrdR
chr6B	637431178	637431786	TRITD6Bv1G205000.3	Potassium-transporting ATPase ATP-binding subunit
chr6B	637452680	637453024	TRITD6Bv1G205010.1	Retrovirus-related Pol polyprotein from transposon TNT 1-94
chr6B	637517818	637520702	TRITD6Bv1G205020.6	Ankyrin repeat-containing protein, putative
chr6B	637520956	637522115	TRITD6Bv1G205030.1	fructose-2,6-bisphosphatase
chr6B	637542048	637542785	TRITD6Bv1G205040.1	U4/U6.U5 small nuclear ribonucleoprotein 27 kDa protein
chr6B	637551481	637551831	TRITD6Bv1G205050.1	arginine N-methyltransferase, putative (DUF688)
chr6B	637553627	637554551	TRITD6Bv1G205060.1	Lectin receptor kinase
chr6B	637555035	637555781	TRITD6Bv1G205070.1	Lectin protein kinase, putative, expressed
chr6B	637557890	637559911	TRITD6Bv1G205080.1	Lectin receptor kinase
chr6B	637561210	637563441	TRITD6Bv1G205090.1	Retrovirus-related Pol polyprotein from transposon TNT 1-94
chr6B	637564128	637565153	TRITD6Bv1G205100.1	Retrovirus-related Pol polyprotein from transposon TNT 1-94
chr6B	637566761	637568794	TRITD6Bv1G205110.1	Lectin receptor kinase
chr6B	637596016	637596393	TRITD6Bv1G205120.1	paired amphipathic helix Sin3-like protein
chr6B	637635460	637635843	TRITD6Bv1G205130.1	60S ribosomal protein L10a-3
chr6B	637667900	637668467	TRITD6Bv1G205140.1	Uroporphyrinogen decarboxylase
chr6B	637681029	637681418	TRITD6Bv1G205150.1	Transposable element protein, putative, Retrotrans_gag
chr6B	637692445	637692951	TRITD6Bv1G205160.1	Retrotransposon protein, putative, unclassified
chr6B	637692654	637693103	TRITD6Bv1G205160.2	Retrotransposon protein, putative, unclassified
chr6B	637703426	637704178	TRITD6Bv1G205170.1	Transposable element protein, putative, Retrotrans_gag
chr6B	637831752	637832123	TRITD6Bv1G205210.1	Retrotransposon protein, putative, Ty3-gypsy subclass
chr6B	637862983	637864299	TRITD6Bv1G205220.1	UDP-D-glucuronate 4-epimerase
chr6B	637882507	637882848	TRITD6Bv1G205230.1	Retrovirus-related Pol polyprotein from transposon opus
chr6B	637954722	637957680	TRITD6Bv1G205260.1	F-box protein
chr6B	637975632	637987536	TRITD6Bv1G205270.3	Kinase
chr6B	637988454	637992747	TRITD6Bv1G205280.1	Autophagy-related protein 18
chr6B	637991103	637992215	TRITD6Bv1G205290.1	Retrotransposon protein, putative, unclassified
chr6B	637997785	637998270	TRITD6Bv1G205300.1	Retrotransposon protein, putative, Ty3-gypsy subclass
chr6B	638024856	638025441	TRITD6Bv1G205310.1	Transposon protein, putative, Pong sub-class
chr6B	638027880	638028925	TRITD6Bv1G205320.1	Aspartyl/glutamyl-tRNA(Asn/Gln) amidotransferase subunit B
chr6B	638035164	638035562	TRITD6Bv1G205330.1	Retrotransposon protein, putative, Ty3-gypsy subclass
chr6B	638049200	638049619	TRITD6Bv1G205340.1	Retrotransposon protein, putative, Ty3-gypsy subclass
chr6B	638366394	638366765	TRITD6Bv1G205350.1	Transposon protein, putative, Pong sub-class
chr6B	638390119	638390496	TRITD6Bv1G205360.1	Serine/threonine-protein phosphatase 2A 56 kDa regulatory subunit epsilon isoform
chr6B	638427726	638428433	TRITD6Bv1G205400.1	Transposon protein, putative, CACTA, En/Spm sub-class
chr6B	638449085	638449539	TRITD6Bv1G205430.1	Cytochrome c biogenesis ATP-binding export protein CcmA
chr6B	638501886	638502842	TRITD6Bv1G205440.1	Tyrosine-protein phosphatase CpsB
chr6B	638509062	638512673	TRITD6Bv1G205450.1	Zinc finger CCCH-type with G patch domain protein
chr6B	638573332	638573907	TRITD6Bv1G205460.1	Retrotransposon protein, putative, Ty1-copia subclass
chr6B	638609480	638609755	TRITD6Bv1G205470.1	plastidic GLC translocator
chr6B	638618529	638618876	TRITD6Bv1G205480.1	RING/U-box superfamily protein
chr6B	638618685	638619035	TRITD6Bv1G205490.1	Survival protein SurE-like phosphatase/nucleotidase
chr6B	638625337	638628174	TRITD6Bv1G205500.1	Serine incorporator
chr6B	638628833	638629252	TRITD6Bv1G205510.1	Cysteine-rich receptor-like protein kinase 5
chr6B	638628865	638630800	TRITD6Bv1G205520.3	Pheophorbide a oxygenase, chloroplastic
chr6B	638675586	638675903	TRITD6Bv1G205530.1	Retrotransposon protein, putative, Ty3-gypsy subclass
chr6B	638734175	638734567	TRITD6Bv1G205540.1	Retrovirus-related Pol polyprotein from transposon TNT 1-94
chr6B	638753030	638754001	TRITD6Bv1G205550.1	Ribonuclease R
chr6B	638776644	638777135	TRITD6Bv1G205560.1	Retrotransposon protein, putative, Ty3-gypsy subclass
chr6B	638795180	638795833	TRITD6Bv1G205570.1	Retrovirus-related Pol polyprotein from transposon TNT 1-94
chr6B	638861569	638864941	TRITD6Bv1G205580.1	Ubiquitin-like-specific protease ESD4
chr6B	638869140	638869528	TRITD6Bv1G205590.1	DNA/RNA polymerases superfamily protein
chr6B	638900582	638901037	TRITD6Bv1G205600.1	Transposon protein, putative, Mutator sub-class
chr6B	638903580	638911872	TRITD6Bv1G205610.3	Isopentenyl-diphosphate delta-isomerase
chr6B	638915048	638915536	TRITD6Bv1G205620.1	Protease inhibitor/seed storage/lipid transfer protein family protein
chr6B	638992039	638992398	TRITD6Bv1G205630.1	Retrovirus-related Pol polyprotein from transposon TNT 1-94
chr6B	638993023	638993541	TRITD6Bv1G205640.1	Retrovirus-related Pol polyprotein from transposon TNT 1-94
chr6B	638993548	638994426	TRITD6Bv1G205650.1	Retrovirus-related Pol polyprotein from transposon TNT 1-94
chr6B	639022326	639022736	TRITD6Bv1G205660.1	Retrotransposon protein, putative, Ty3-gypsy subclass
chr6B	639067763	639070684	TRITD6Bv1G205670.1	Disease resistance protein RPM1
chr6B	639082706	639083074	TRITD6Bv1G205680.1	Retrovirus-related Pol polyprotein from transposon TNT 1-94
chr6B	639128026	639128655	TRITD6Bv1G205690.1	Vacuolar protein sorting-associated protein 33-like protein
chr6B	639128882	639143753	TRITD6Bv1G205700.1	Vacuolar protein-sorting protein 33
chr6B	639185314	639206434	TRITD6Bv1G205710.1	D-lactate dehydrogenase, putative
chr6B	639194149	639194931	TRITD6Bv1G205720.1	Major facilitator superfamily protein
chr6B	639282042	639282593	TRITD6Bv1G205730.1	Myb/SANT-like DNA-binding domain protein
chr6B	639291735	639292091	TRITD6Bv1G205740.1	Phospholipase D LiSicTox-alphaII1
chr6B	639293169	639303581	TRITD6Bv1G205750.8	Clustered mitochondria protein
chr6B	639351394	639352029	TRITD6Bv1G205760.1	Zinc finger, C3HC4 type (RING finger) family protein
chr6B	639371882	639372190	TRITD6Bv1G205770.1	Retrovirus-related Pol polyprotein from transposon TNT 1-94
chr6B	639373011	639373346	TRITD6Bv1G205780.1	Retrovirus-related Pol polyprotein from transposon TNT 1-94
chr6B	639376958	639377344	TRITD6Bv1G205790.1	TDP-N-acetylfucosamine:lipid II N-acetylfucosaminyltransferase
chr6B	639393928	639394350	TRITD6Bv1G205800.1	Retrotransposon protein, putative, Ty3-gypsy subclass
chr6B	639402973	639403329	TRITD6Bv1G205810.1	Retrotransposon protein, putative, Ty3-gypsy subclass
chr6B	639431112	639431489	TRITD6Bv1G205820.1	Retrotransposon protein, putative, unclassified
chr6B	639472094	639472936	TRITD6Bv1G205830.1	Retrovirus-related Pol polyprotein from transposon TNT 1-94
chr6B	639476411	639476809	TRITD6Bv1G205840.1	DEAD-box ATP-dependent RNA helicase 40
chr6B	639477114	639477815	TRITD6Bv1G205850.1	P-loop nucleoside triphosphate hydrolases superfamily protein with CH (Calponin Homology) domain-containing protein
chr6B	639482986	639483558	TRITD6Bv1G205860.1	Retrovirus-related Pol polyprotein from transposon TNT 1-94
chr6B	639487878	639488186	TRITD6Bv1G205870.1	Membrane steroid-binding protein
chr6B	639491121	639491579	TRITD6Bv1G205880.1	Protein FAR1-RELATED SEQUENCE 5
chr6B	639536560	639541221	TRITD6Bv1G205890.1	Embryogenesis transmembrane protein-like
chr6B	639537925	639538266	TRITD6Bv1G205900.1	Green-sensitive opsin
chr6B	639546256	639549009	TRITD6Bv1G205910.3	ATP-dependent DNA helicase
chr6B	639549614	639553062	TRITD6Bv1G205920.1	Snf1-related kinase interactor 1, putative
chr6B	639596249	639599379	TRITD6Bv1G205930.1	RING/U-box superfamily protein
chr6B	639761795	639762442	TRITD6Bv1G205960.1	Retrotransposon protein, putative, Ty3-gypsy subclass
chr6B	639777383	639777730	TRITD6Bv1G205970.1	Kelch repeat and BTB domain-containing protein 8
chr6B	639778857	639779480	TRITD6Bv1G205980.1	Gag-Pol polyprotein
chr6B	639782596	639782997	TRITD6Bv1G205990.1	MND1-interacting protein 1
chr6B	639823073	639823399	TRITD6Bv1G206000.1	Retrotransposon protein, putative, unclassified
chr6B	639923931	639924530	TRITD6Bv1G206040.1	N-acyl-phosphatidylethanolamine-hydrolyzing phospholipase D
chr6B	639924362	639931312	TRITD6Bv1G206050.1	QWRF motif protein (DUF566)
chr6B	639933951	639937404	TRITD6Bv1G206060.2	Translation initiation factor IF-3
chr6B	639937975	639938286	TRITD6Bv1G206070.1	Deoxyguanosinetriphosphate triphosphohydrolase
chr6B	639938195	639938509	TRITD6Bv1G206070.2	Ataxia telangiectasia-mutated and RAD3-like protein
chr6B	639939022	639940088	TRITD6Bv1G206080.1	Transposon Ty3-G Gag-Pol polyprotein
chr6B	639944139	639944790	TRITD6Bv1G206090.1	CsAtPR5
chr6B	639944660	639945280	TRITD6Bv1G206090.2	Phosphate acyltransferase
chr6B	640208160	640208621	TRITD6Bv1G206100.1	Oxidant-induced cell-cycle arrest protein 5
chr6B	640209986	640210198	TRITD6Bv1G206110.1	Calreticulin/calnexin
chr6B	640210233	640210736	TRITD6Bv1G206120.1	basic pentacysteine 6
chr6B	640252957	640253277	TRITD6Bv1G206130.1	Retrotransposon protein, putative, Ty3-gypsy subclass
chr6B	640261913	640262506	TRITD6Bv1G206140.1	Retrovirus-related Pol polyprotein from transposon TNT 1-94
chr6B	640264106	640264873	TRITD6Bv1G206150.1	Retrovirus-related Pol polyprotein from transposon TNT 1-94
chr6B	640281548	640281850	TRITD6Bv1G206160.1	Chaperone DnaJ-domain superfamily protein
chr6B	640465791	640466189	TRITD6Bv1G206170.1	glutamate receptor 3.4
chr6B	640579322	640581459	TRITD6Bv1G206180.1	Ubiquitin carboxyl-terminal hydrolase-related protein
chr6B	640580407	640581459	TRITD6Bv1G206180.2	Ubiquitin carboxyl-terminal hydrolase-related protein
chr6B	640581139	640581459	TRITD6Bv1G206180.3	histone deacetylase 5
chr6B	640581882	640582286	TRITD6Bv1G206190.1	Chromatin structure-remodeling complex protein SYD
chr6B	640624050	640625014	TRITD6Bv1G206200.2	65-kDa microtubule-associated-like protein
chr6B	640707633	640707941	TRITD6Bv1G206210.1	RING/U-box superfamily protein
chr6B	640709910	640720285	TRITD6Bv1G206220.3	Myosin heavy chain-like protein, putative
chr6B	640722197	640723148	TRITD6Bv1G206230.1	Early response to dehydration 15-like protein
chr6B	640722374	640723331	TRITD6Bv1G206240.1	CASC3/Barentsz eIF4AIII binding protein
chr6B	640744391	640745981	TRITD6Bv1G206250.4	WEB family protein, chloroplastic
chr6B	640750873	640756430	TRITD6Bv1G206260.1	Protein phosphatase 2C
chr6B	640760957	640761580	TRITD6Bv1G206270.1	Retrovirus-related Pol polyprotein from transposon TNT 1-94
chr6B	640766715	640767023	TRITD6Bv1G206280.1	Retrotransposon protein, putative, Ty1-copia subclass
chr6B	640842164	640843816	TRITD6Bv1G206290.1	CsAtPR5
chr6B	640845869	640846656	TRITD6Bv1G206300.1	CsAtPR5
chr6B	640852605	640853039	TRITD6Bv1G206310.1	Histidine kinase 4
chr6B	640860018	640860764	TRITD6Bv1G206320.1	Transposon protein, putative, CACTA, En/Spm sub-class
chr6B	640881027	640881293	TRITD6Bv1G206330.1	Cytochrome c oxidase copper chaperone
chr6B	640896848	640897393	TRITD6Bv1G206340.1	Retrovirus-related Pol polyprotein from transposon TNT 1-94
chr6B	640933341	640933892	TRITD6Bv1G206350.1	Phosphoribosyl-ATP pyrophosphatase
chr6B	640935116	640939816	TRITD6Bv1G206360.1	Carboxypeptidase
chr6B	640946783	640946986	TRITD6Bv1G206370.1	SUMO activating enzyme 1B
chr6B	640972629	640973336	TRITD6Bv1G206380.1	Retrovirus-related Pol polyprotein from transposon TNT 1-94
chr6B	640990909	640991436	TRITD6Bv1G206390.1	Retrovirus-related Pol polyprotein from transposon TNT 1-94
chr6B	640992532	640993014	TRITD6Bv1G206400.1	Retrovirus-related Pol polyprotein from transposon TNT 1-94
chr6B	640996834	640997142	TRITD6Bv1G206410.1	trehalose-6-phosphatase synthase S4
chr6B	641033687	641034361	TRITD6Bv1G206420.1	Retrotransposon protein, putative, Ty3-gypsy subclass
chr6B	641073417	641074118	TRITD6Bv1G206430.1	ABC-2 type transporter family protein
chr6B	641088777	641089298	TRITD6Bv1G206440.1	Blast resistance protein Pi-ta
chr6B	641111350	641114852	TRITD6Bv1G206460.1	Disease resistance protein (NBS-LRR class) family
chr6B	641150421	641152277	TRITD6Bv1G206450.3	NBS-LRR disease resistance protein, putative
chr6B	641152424	641158922	TRITD6Bv1G206470.1	Disease resistance protein (NBS-LRR class) family
chr6B	641168642	641169121	TRITD6Bv1G206480.1	Transposon protein, putative, CACTA, En/Spm sub-class
chr6B	641180346	641180946	TRITD6Bv1G206490.1	Transducin/WD40 repeat-like superfamily protein
chr6B	641180346	641180946	TRITD6Bv1G206490.2	Transducin/WD40 repeat-like superfamily protein
chr6B	641194446	641194841	TRITD6Bv1G206500.1	Retrotransposon protein, putative, Ty3-gypsy subclass
chr6B	641212586	641212942	TRITD6Bv1G206510.1	Retrovirus-related Pol polyprotein from transposon TNT 1-94
chr6B	641278272	641278658	TRITD6Bv1G206520.1	Transposon TX1 uncharacterized
chr6B	641281934	641285410	TRITD6Bv1G206530.1	Purple acid phosphatase
chr6B	641285966	641286274	TRITD6Bv1G206540.1	Endonuclease/exonuclease/phosphatase family protein
chr6B	641286572	641287969	TRITD6Bv1G206550.1	LINE-1 reverse transcriptase like
chr6B	641288040	641288555	TRITD6Bv1G206560.1	Retrotransposon protein, putative, unclassified
chr6B	641304706	641308121	TRITD6Bv1G206570.1	Leucine aminopeptidase, putative
chr6B	641309463	641320282	TRITD6Bv1G206580.2	Formin-like protein
chr6B	641340933	641341247	TRITD6Bv1G206590.1	Retrotransposon protein, putative, Ty1-copia subclass
chr6B	641347626	641359431	TRITD6Bv1G206600.1	C2 domain-containing protein / GRAM domain-containing protein
chr6B	641364915	641365304	TRITD6Bv1G206610.1	Retrovirus-related Pol polyprotein from transposon TNT 1-94
chr6B	641381803	641387716	TRITD6Bv1G206620.3	Ubiquitin carboxyl-terminal hydrolase, putative
chr6B	641392239	641392589	TRITD6Bv1G206630.1	Sterile alpha motif (SAM) domain-containing protein
chr6B	641392280	641392783	TRITD6Bv1G206630.2	APO RNA-binding protein (DUF794)
chr6B	641392280	641392783	TRITD6Bv1G206630.3	Copine (Calcium-dependent phospholipid-binding protein) family
chr6B	641398789	641400057	TRITD6Bv1G206640.1	F-box family protein
chr6B	641457004	641457582	TRITD6Bv1G206650.1	Retrotransposon protein, putative, Ty3-gypsy subclass
chr6B	641485996	641486896	TRITD6Bv1G206680.1	Replication protein A 32 kDa subunit A
chr6B	641486169	641486931	TRITD6Bv1G206680.2	Replication protein A 32 kDa subunit B
chr6B	641495658	641496787	TRITD6Bv1G206690.1	pesticidal crystal cry8Ba protein
chr6B	641497306	641498681	TRITD6Bv1G206700.2	mitogen-activated protein kinase 1
chr6B	641505755	641506322	TRITD6Bv1G206710.1	Glutathione S-transferase T3
chr6B	641506420	641506974	TRITD6Bv1G206720.1	no-apical-meristem-associated carboxy-terminal domain protein
chr6B	641509954	641511261	TRITD6Bv1G206730.1	F-box family protein
chr6B	641511887	641513005	TRITD6Bv1G206740.1	Transposon Ty3-G Gag-Pol polyprotein
chr6B	641513066	641513887	TRITD6Bv1G206750.1	Transposon Ty3-I Gag-Pol polyprotein
chr6B	641514044	641514622	TRITD6Bv1G206760.1	Gag-pol polyprotein
chr6B	641514635	641515591	TRITD6Bv1G206770.1	Transposon Ty3-I Gag-Pol polyprotein
chr6B	641516396	641516917	TRITD6Bv1G206780.1	aspartate aminotransferase
chr6B	641573851	641574162	TRITD6Bv1G206790.1	Transposon protein, putative, CACTA, En/Spm sub-class
chr6B	641580728	641583372	TRITD6Bv1G206800.2	carboxyl-terminal peptidase, putative (DUF239)
chr6B	641585739	641586041	TRITD6Bv1G206810.1	F-box/RNI-like superfamily protein
chr6B	641607415	641608741	TRITD6Bv1G206820.1	Protein POLAR LOCALIZATION DURING ASYMMETRIC DIVISION AND REDISTRIBUTION
chr6B	641610435	641610860	TRITD6Bv1G206830.1	Retrovirus-related Pol polyprotein from transposon TNT 1-94
chr6B	641627692	641628030	TRITD6Bv1G206840.1	Retrovirus-related Pol polyprotein from transposon TNT 1-94
chr6B	641627786	641628085	TRITD6Bv1G206840.2	MUTS-homologue 5
chr6B	641631614	641632946	TRITD6Bv1G206850.1	Protein POLAR LOCALIZATION DURING ASYMMETRIC DIVISION AND REDISTRIBUTION
chr6B	641632319	641632627	TRITD6Bv1G206860.1	S-adenosylmethionine synthase
chr6B	641632593	641633006	TRITD6Bv1G206860.2	D-amino acid dehydrogenase
chr6B	641633327	641635940	TRITD6Bv1G206870.1	carboxyl-terminal peptidase, putative (DUF239)
chr6B	641637345	641639107	TRITD6Bv1G206880.1	Anaphase-promoting complex subunit 5
chr6B	641690063	641691633	TRITD6Bv1G206900.1	Protein FAR1-RELATED SEQUENCE 5
chr6B	641691188	641691409	TRITD6Bv1G206900.2	Cytochrome P450 family flavone synthase
chr6B	641704107	641704442	TRITD6Bv1G206910.1	Transposon Ty3-G Gag-Pol polyprotein
chr6B	641756399	641756938	TRITD6Bv1G206940.1	Heat-inducible transcription repressor HrcA
chr6B	641775125	641782548	TRITD6Bv1G206950.1	Serine/threonine-protein phosphatase
chr6B	641790272	641790802	TRITD6Bv1G206960.1	B3 domain-containing protein
chr6B	641832198	641832602	TRITD6Bv1G206970.1	Transposon protein, putative, CACTA, En/Spm sub-class
chr6B	641853660	641854004	TRITD6Bv1G206980.1	50S ribosomal protein L15
chr6B	641857764	641858311	TRITD6Bv1G206990.1	Transposon protein, putative, CACTA, En/Spm sub-class, expressed
chr6B	641857948	641863897	TRITD6Bv1G206990.2	Transposon protein, putative, CACTA, En/Spm sub-class
chr6B	641891978	641892424	TRITD6Bv1G207030.1	Retrovirus-related Pol polyprotein from transposon TNT 1-94
chr6B	641892503	641892922	TRITD6Bv1G207040.1	Retrovirus-related pol polyprotein
chr6B	641895059	641895463	TRITD6Bv1G207050.1	Retrovirus-related Pol polyprotein from transposon TNT 1-94
chr6B	641924072	641931104	TRITD6Bv1G207060.1	carboxyl-terminal peptidase, putative (DUF239)
chr6B	641932768	641934701	TRITD6Bv1G207070.2	Photosystem II 10 kDa polypeptide
chr6B	641937296	641937598	TRITD6Bv1G207080.1	C3H4 type zinc finger protein
chr6B	641943991	641944329	TRITD6Bv1G207090.1	Transposon protein, putative, CACTA, En/Spm sub-class
chr6B	642021873	642022178	TRITD6Bv1G207100.1	Histone deacetylase
chr6B	642044905	642045222	TRITD6Bv1G207110.1	Retrotransposon protein, putative, Ty3-gypsy subclass
chr6B	642087133	642087483	TRITD6Bv1G207120.1	Transposon protein, putative, CACTA, En/Spm sub-class
chr6B	642107173	642107783	TRITD6Bv1G207130.1	Glutamate-1-semialdehyde 2,1-aminomutase
chr6B	642107173	642108687	TRITD6Bv1G207130.2	MEI2-like 2
chr6B	642107468	642108687	TRITD6Bv1G207130.3	Structural maintenance of chromosomes protein 1
chr6B	642171415	642173191	TRITD6Bv1G207140.4	FBD-associated F-box protein
chr6B	642266020	642267258	TRITD6Bv1G207150.1	Heme A synthase
chr6B	642267249	642268409	TRITD6Bv1G207150.2	Sec14p-like phosphatidylinositol transfer family protein
chr6B	642268966	642269283	TRITD6Bv1G207160.1	Zinc finger C-x8-C-x5-C-x3-H type family protein
chr6B	642277308	642277697	TRITD6Bv1G207170.1	Retrotransposon protein, putative, unclassified
chr6B	642290046	642292988	TRITD6Bv1G207190.1	ENTH/VHS family protein
chr6B	642290046	642292988	TRITD6Bv1G207190.2	Mediator of RNA polymerase II transcription subunit 14
chr6B	642478571	642479465	TRITD6Bv1G207210.1	Amine oxidase
chr6B	642574146	642574448	TRITD6Bv1G207220.1	DNA mismatch repair protein MutS
chr6B	642574481	642574870	TRITD6Bv1G207230.1	Cysteine desulfurase
chr6B	642574481	642575555	TRITD6Bv1G207230.2	Elongation factor 1-alpha
chr6B	642577254	642579232	TRITD6Bv1G207200.9	FBD-associated F-box protein
chr6B	642590717	642593969	TRITD6Bv1G207240.1	Protein FAR1-RELATED SEQUENCE 5
chr6B	642594941	642596231	TRITD6Bv1G207250.1	DNA mismatch repair protein MutS
chr6B	642596280	642596597	TRITD6Bv1G207260.1	ATP binding microtubule motor family protein
chr6B	642596796	642597879	TRITD6Bv1G207270.1	P-loop containing nucleoside triphosphate hydrolases superfamily protein
chr6B	642639354	642639761	TRITD6Bv1G207280.1	Photosystem II 12 kDa extrinsic protein
chr6B	642664915	642665688	TRITD6Bv1G207290.1	cationic amino acid transporter 6
chr6B	642665014	642668332	TRITD6Bv1G207300.1	Basic helix-loop-helix transcription factor
chr6B	642669382	642673937	TRITD6Bv1G207310.2	ATP-dependent RNA helicase DeaD
chr6B	642671578	642671964	TRITD6Bv1G207320.1	Actin-related protein 2/3 complex subunit 3
chr6B	642674967	642675269	TRITD6Bv1G207330.1	F-box/kelch-repeat protein
chr6B	642681603	642682520	TRITD6Bv1G207340.1	Formin-like protein 13
chr6B	642681662	642683413	TRITD6Bv1G207340.2	Pentatricopeptide repeat-containing protein
chr6B	642790877	642791737	TRITD6Bv1G207350.1	Transposon protein, putative, Mutator sub-class
chr6B	642791682	642791999	TRITD6Bv1G207350.2	Transposon protein, putative, Mutator sub-class
chr6B	642799885	642817809	TRITD6Bv1G207360.1	T-complex protein 1 subunit delta
chr6B	642815336	642816019	TRITD6Bv1G207360.4	Aspartate carbamoyltransferase
chr6B	642835743	642836156	TRITD6Bv1G207370.1	vesicle-associated protein 1-4
chr6B	642851176	642902362	TRITD6Bv1G207380.1	FAR1-related sequence protein, putative
chr6B	642854900	642855199	TRITD6Bv1G207390.1	Transposon protein, putative, CACTA, En/Spm sub-class, expressed
chr6B	642860845	642863601	TRITD6Bv1G207400.1	Retrotransposon protein, putative, Ty3-gypsy subclass
chr6B	642863737	642864192	TRITD6Bv1G207410.1	Transposon Ty3-G Gag-Pol polyprotein
chr6B	642868370	642868789	TRITD6Bv1G207420.1	Zinc finger, CCHC-type-like protein
chr6B	642892241	642903275	TRITD6Bv1G207380.2	evolutionarily conserved C-terminal region 3
chr6B	642902365	642903103	TRITD6Bv1G207380.3	Protein FAR1-RELATED SEQUENCE 5
chr6B	642902811	642927695	TRITD6Bv1G207380.4	Protein FAR1-RELATED SEQUENCE 5
chr6B	642903070	642927695	TRITD6Bv1G207380.5	FAR1-related sequence 5
chr6B	642926824	642927117	TRITD6Bv1G207380.6	Vomeronasal type-1 receptor 3
chr6B	642934024	642934398	TRITD6Bv1G207440.1	RNA-directed DNA polymerase (reverse transcriptase)-related family protein
chr6B	642937672	642943579	TRITD6Bv1G207450.2	Maturase K
chr6B	642940142	642940447	TRITD6Bv1G207460.1	Retrovirus-related Pol polyprotein from transposon TNT 1-94
chr6B	642953940	642954254	TRITD6Bv1G207470.1	Transposable element protein, putative
chr6B	642962251	642962541	TRITD6Bv1G207480.1	Multiprotein-bridging factor 1
chr6B	642978597	643023362	TRITD6Bv1G207490.1	AGAMOUS-like MADS-box protein
chr6B	642978840	642979085	TRITD6Bv1G207500.1	Ribosome maturation factor RimM
chr6B	643022625	643069596	TRITD6Bv1G207510.1	AGAMOUS-like MADS-box protein
chr6B	643043428	643113620	TRITD6Bv1G207520.1	Agamous-like MADS-box protein AGL80
chr6B	643195899	643197029	TRITD6Bv1G207530.1	Retrovirus-related Pol polyprotein LINE-1
chr6B	643258487	643260126	TRITD6Bv1G207560.1	Translation initiation factor IF-2
chr6B	643271943	643272257	TRITD6Bv1G207570.1	Leucine-rich repeat protein kinase family protein
chr6B	643578577	643579032	TRITD6Bv1G207580.1	Retrovirus-related Pol polyprotein from transposon 17.6
chr6B	643607815	643608654	TRITD6Bv1G207590.1	MADS-box transcription factor family protein
chr6B	643608009	643608329	TRITD6Bv1G207600.1	FAD-binding Berberine family protein
chr6B	643614706	643615779	TRITD6Bv1G207610.1	Retrovirus-related Pol polyprotein from transposon TNT 1-94
chr6B	643629742	643630086	TRITD6Bv1G207620.1	Transposon protein, putative, CACTA, En/Spm sub-class
chr6B	643632658	643633086	TRITD6Bv1G207630.1	Transposon protein, putative, Mutator sub-class
chr6B	643698168	643698662	TRITD6Bv1G207650.1	Retrovirus-related Pol polyprotein LINE-1
chr6B	643698717	643699325	TRITD6Bv1G207660.1	Retrovirus-related Pol polyprotein LINE-1
chr6B	643726939	643727586	TRITD6Bv1G207670.1	50S ribosomal protein L11-1
chr6B	643779734	643780081	TRITD6Bv1G207680.1	Retrotransposon protein, putative, unclassified
chr6B	643874790	643878521	TRITD6Bv1G207690.1	Two-component response regulator
chr6B	643881244	643881941	TRITD6Bv1G207710.1	Zinc finger MYM-type-like protein
chr6B	644082316	644093469	TRITD6Bv1G207720.1	carboxyl-terminal peptidase (DUF239)
chr6B	644403060	644403359	TRITD6Bv1G207730.1	Transposon protein, putative, CACTA, En/Spm sub-class
chr6B	644455549	644460412	TRITD6Bv1G207740.1	Zinc finger protein VAR3, chloroplastic
chr6B	644462040	644470009	TRITD6Bv1G207750.2	Receptor-like protein kinase
chr6B	644462532	644463479	TRITD6Bv1G207760.1	sterile alpha motif (SAM) domain-containing protein
chr6B	644463576	644464571	TRITD6Bv1G207770.1	Transposon Ty3-G Gag-Pol polyprotein
chr6B	644464842	644466101	TRITD6Bv1G207780.1	Pol polyprotein
chr6B	644466282	644467514	TRITD6Bv1G207790.1	Transposon Ty3-G Gag-Pol polyprotein
chr6B	644470401	644470829	TRITD6Bv1G207800.1	Leucine-rich repeat receptor-like protein kinase
chr6B	644481131	644481370	TRITD6Bv1G207820.1	Myb/SANT-like DNA-binding domain protein
chr6B	644584540	644585469	TRITD6Bv1G207830.1	MADS-box transcription factor family protein
chr6B	644694254	644696730	TRITD6Bv1G207840.1	Transmembrane protein 184C
chr6B	644702151	644702510	TRITD6Bv1G207850.1	Serine/threonine-protein kinase PknL
chr6B	644702456	644703035	TRITD6Bv1G207860.1	Cysteine/histidine-rich C1 domain-containing protein
chr6B	644703368	644703715	TRITD6Bv1G207870.1	Disease resistance protein (NBS-LRR class) family
chr6B	644703966	644707322	TRITD6Bv1G207880.2	Alpha/beta-Hydrolases superfamily protein
chr6B	644709086	644709418	TRITD6Bv1G207890.1	Serine/threonine-protein kinase
chr6B	644710132	644711013	TRITD6Bv1G207900.1	Transposase
chr6B	644717341	644717715	TRITD6Bv1G207910.1	50S ribosomal protein L10
chr6B	644736545	644737252	TRITD6Bv1G207920.1	Transcription intermediary factor 1-alpha
chr6B	644758584	644766614	TRITD6Bv1G207930.5	Protein kinase-like
chr6B	644767798	644769504	TRITD6Bv1G207940.1	Translation initiation factor IF-2, putative isoform 2
chr6B	644959677	644959976	TRITD6Bv1G207980.1	Reverse transcriptase
chr6B	645044446	645047552	TRITD6Bv1G207990.1	Plasma membrane ATPase
chr6B	645044814	645045704	TRITD6Bv1G208000.1	Calcium-gated potassium channel MthK
chr6B	645046321	645047730	TRITD6Bv1G208010.1	Mha2
chr6B	645262268	645266935	TRITD6Bv1G208050.1	DNA helicase
chr6B	645269930	645273994	TRITD6Bv1G208060.1	Aspartate aminotransferase
chr6B	645330213	645330557	TRITD6Bv1G208070.1	nuclear pore complex protein (DUF3414)
chr6B	645342631	645344725	TRITD6Bv1G208080.1	SAC3/GANP/Nin1/mts3/eIF-3 p25 family protein
chr6B	645343129	645344725	TRITD6Bv1G208080.2	SAC3/GANP/Nin1/mts3/eIF-3 p25 family protein
chr6B	645343129	645344725	TRITD6Bv1G208080.3	SAC3/GANP/Nin1/mts3/eIF-3 p25 family protein
chr6B	645344896	645346880	TRITD6Bv1G208090.1	Leukocyte receptor cluster member 8
chr6B	645345537	645346880	TRITD6Bv1G208090.2	DNA-directed RNA polymerase subunit beta'
chr6B	645346941	645347400	TRITD6Bv1G208100.1	Coatomer subunit gamma-2
chr6B	645351728	645352033	TRITD6Bv1G208110.1	QWRF motif protein (DUF566)
chr6B	645615422	645616174	TRITD6Bv1G208120.1	serine/arginine repetitive matrix-like protein
chr6B	645618945	645619361	TRITD6Bv1G208130.1	Translation initiation factor IF-2
chr6B	645618996	645621719	TRITD6Bv1G208140.1	Transmembrane 9 superfamily member
chr6B	645643128	645643607	TRITD6Bv1G208150.1	Retrovirus-related Pol polyprotein from transposon TNT 1-94
chr6B	645645756	645646106	TRITD6Bv1G208160.1	Retrovirus-related Pol polyprotein from transposon TNT 1-94
chr6B	645654974	645655297	TRITD6Bv1G208170.1	Aconitate hydratase
chr6B	645746731	645748044	TRITD6Bv1G208180.1	Alpha-1,6-mannosyl-glycoprotein 2-beta-N-acetylglucosaminyltransferase
chr6B	645941380	645942336	TRITD6Bv1G208190.1	Transposon Ty3-I Gag-Pol polyprotein
chr6B	645981266	645981694	TRITD6Bv1G208200.1	Late embryogenesis abundant (LEA) hydroxyproline-rich glycoprotein family
chr6B	645983290	645984590	TRITD6Bv1G208210.1	P-loop containing nucleoside triphosphate hydrolases superfamily protein
chr6B	645983554	645984559	TRITD6Bv1G208210.2	Guanylate cyclase soluble subunit beta-2
chr6B	645983554	645987062	TRITD6Bv1G208210.3	basic helix-loop-helix (bHLH) DNA-binding superfamily protein
chr6B	645983554	645987874	TRITD6Bv1G208210.4	basic helix-loop-helix (bHLH) DNA-binding superfamily protein
chr6B	645984597	645987874	TRITD6Bv1G208210.5	transcription factor BIG PETAL P (BPE)
chr6B	645985922	645990300	TRITD6Bv1G208210.6	Squalene synthase
chr6B	645998427	645998735	TRITD6Bv1G208230.1	Imidazole glycerol phosphate synthase subunit HisF
chr6B	645999295	645999733	TRITD6Bv1G208240.1	Homeobox-leucine zipper protein REVOLUTA
chr6B	646237747	646240884	TRITD6Bv1G208250.1	Bidirectional sugar transporter SWEET
chr6B	646238288	646238680	TRITD6Bv1G208260.1	Retrotransposon protein, putative, unclassified
chr6B	646251212	646251514	TRITD6Bv1G208270.1	Cysteine desulfurase IscS
chr6B	646258429	646258839	TRITD6Bv1G208280.1	NHL domain-containing protein
chr6B	646303811	646304259	TRITD6Bv1G208290.1	plant U-box 26
chr6B	646406025	646406408	TRITD6Bv1G208350.1	Tetratricopeptide repeat (TPR)-like superfamily protein
chr6B	646411217	646414930	TRITD6Bv1G208360.1	Two-component response regulator
chr6B	646435863	646436354	TRITD6Bv1G208370.1	Transposon protein, putative, CACTA, En/Spm sub-class
chr6B	646476003	646476332	TRITD6Bv1G208380.1	Pol polyprotein
chr6B	646483215	646483904	TRITD6Bv1G208390.1	Transposon Ty3-I Gag-Pol polyprotein
chr6B	646574411	646574719	TRITD6Bv1G208400.1	S-adenosyl-L-methionine-dependent methyltransferases superfamily protein
chr6B	646648658	646649140	TRITD6Bv1G208410.1	Cyclopropane-fatty-acyl-phospholipid synthase
chr6B	646708614	646709393	TRITD6Bv1G208420.1	F-box protein family-like
chr6B	646746756	646748238	TRITD6Bv1G208430.1	F-box/RNI-like superfamily protein
chr6B	646796094	646796438	TRITD6Bv1G208440.1	Retrotransposon protein, putative, unclassified
chr6B	646837025	646840277	TRITD6Bv1G208480.1	Two-component response regulator
chr6B	646876997	646877323	TRITD6Bv1G208490.1	Vacuolar-processing enzyme
chr6B	646928677	646930059	TRITD6Bv1G208500.1	Retrotransposon protein, putative, Ty3-gypsy subclass
chr6B	647000422	647011536	TRITD6Bv1G208510.1	Serine/threonine-protein phosphatase 7 long form like
chr6B	647020034	647020360	TRITD6Bv1G208520.1	V-type proton ATPase proteolipid subunit
chr6B	647045143	647049848	TRITD6Bv1G208530.1	Protein kinase family protein
chr6B	647057708	647057965	TRITD6Bv1G208540.1	Acetyl-coenzyme A carboxylase carboxyl transferase subunit beta, chloroplastic
chr6B	647160622	647162076	TRITD6Bv1G208550.1	Chromodomain-helicase-DNA-binding protein 9
chr6B	647170203	647170433	TRITD6Bv1G208560.1	Wall-associated receptor kinase 3
chr6B	647203053	647203388	TRITD6Bv1G208570.1	Copia-like polyprotein
chr6B	647214231	647214617	TRITD6Bv1G208580.1	LINE-1 reverse transcriptase isogeny
chr6B	647214553	647214864	TRITD6Bv1G208580.2	Reverse transcriptase like protein
chr6B	647234647	647235767	TRITD6Bv1G208590.1	RING/U-box superfamily protein
chr6B	647308745	647309224	TRITD6Bv1G208600.1	Retrotransposon protein, putative, Ty3-gypsy subclass
chr6B	647310467	647310916	TRITD6Bv1G208610.1	Retrotransposon protein, putative, Ty3-gypsy subclass
chr6B	647385558	647385866	TRITD6Bv1G208620.1	Gag-Pol polyprotein
chr6B	647421300	647421713	TRITD6Bv1G208630.1	Retrotransposon protein, putative, Ty3-gypsy subclass
chr6B	647459476	647459814	TRITD6Bv1G208640.1	Transposon protein, putative, CACTA, En/Spm sub-class
chr6B	647484553	647485092	TRITD6Bv1G208650.1	Mitochondrial transcription termination factor-like
chr6B	647544721	647545872	TRITD6Bv1G208700.1	Mitochondrial transcription termination factor-like
chr6B	647682580	647682999	TRITD6Bv1G208720.1	Retrotransposon protein, putative, unclassified
chr6B	647730019	647730471	TRITD6Bv1G208730.1	Retrotransposon protein, putative, Ty3-gypsy subclass
chr6B	647777711	647777971	TRITD6Bv1G208740.1	Replication protein A 70 kDa DNA-binding subunit
chr6B	647835397	647835756	TRITD6Bv1G208760.1	Retrovirus-related Pol polyprotein from transposon TNT 1-94
chr6B	647861926	647862222	TRITD6Bv1G208770.1	Polynucleotidyl transferase, ribonuclease H-like superfamily protein
chr6B	647872888	647873208	TRITD6Bv1G208780.1	Transposon protein, putative, CACTA, En/Spm sub-class
chr6B	647906465	647907661	TRITD6Bv1G208800.1	LINE-1 reverse transcriptase like
chr6B	647927040	647927726	TRITD6Bv1G208830.1	DNA-directed RNA polymerase subunit beta'
chr6B	647951535	647954219	TRITD6Bv1G208840.1	aminophospholipid ATPase 2
chr6B	648078303	648078599	TRITD6Bv1G208880.1	Reverse transcriptase
chr6B	648101356	648102162	TRITD6Bv1G208900.1	Retrotransposon protein, putative, unclassified
chr6B	648115026	648119166	TRITD6Bv1G208910.3	E3 ubiquitin-protein ligase
chr6B	648179002	648179361	TRITD6Bv1G208950.1	Lipoxygenase
chr6B	648182070	648182486	TRITD6Bv1G208970.1	Polyadenylate-binding protein 1
chr6B	648247445	648247840	TRITD6Bv1G208990.1	Retrotransposon protein, putative, Ty3-gypsy subclass
chr6B	648292717	648293037	TRITD6Bv1G209000.1	meiosis chromosome segregation family protein
chr6B	648295876	648296259	TRITD6Bv1G209010.1	Retrotransposon protein, putative, Ty3-gypsy subclass
chr6B	648409395	648410603	TRITD6Bv1G209020.1	phosphatidyl inositol monophosphate 5 kinase
chr6B	648410054	648410379	TRITD6Bv1G209020.2	60S ribosomal protein L28
chr6B	648425714	648426181	TRITD6Bv1G209030.1	Receptor-like protein kinase
chr6B	648426280	648426834	TRITD6Bv1G209040.1	Protein kinase family protein
chr6B	648454508	648454930	TRITD6Bv1G209050.1	Transposon protein, putative, CACTA, En/Spm sub-class
chr6B	648519334	648519780	TRITD6Bv1G209070.1	Pol polyprotein
chr6B	648571872	648572186	TRITD6Bv1G209110.1	Transposon protein, putative, CACTA, En/Spm sub-class
chr6B	648634282	648634662	TRITD6Bv1G209120.1	Retrotransposon protein, putative, unclassified
chr6B	648639903	648640781	TRITD6Bv1G209130.1	Retrotransposon protein, putative, unclassified
chr6B	648684078	648684833	TRITD6Bv1G209140.1	Retrovirus-related Pol polyprotein LINE-1
chr6B	648743622	648743921	TRITD6Bv1G209170.1	Na+/H+ antiporter
chr6B	648792499	648793613	TRITD6Bv1G209180.1	Smg-4/UPF3 family protein
chr6B	648799507	648799927	TRITD6Bv1G209190.1	30S ribosomal protein S24e
chr6B	648816256	648816603	TRITD6Bv1G209200.1	Retrovirus-related Pol polyprotein from transposon TNT 1-94
chr6B	648828036	648828559	TRITD6Bv1G209210.1	NAD(P)H-quinone oxidoreductase subunit 2 B, chloroplastic
chr6B	648832840	648833347	TRITD6Bv1G209210.4	SPOC domain / Transcription elongation factor S-II protein
chr6B	648845448	648845792	TRITD6Bv1G209220.1	Transposon Ty3-I Gag-Pol polyprotein
chr6B	648859278	648865578	TRITD6Bv1G209230.1	Neurochondrin
chr6B	648904101	648904758	TRITD6Bv1G209240.1	phospholipase C 2
chr6B	648904101	648904875	TRITD6Bv1G209240.2	phospholipase C 2
chr6B	648908023	648909066	TRITD6Bv1G209250.1	Helicase-like protein
chr6B	648912174	648912488	TRITD6Bv1G209280.1	ATP-dependent DNA helicase
chr6B	648933522	648933914	TRITD6Bv1G209290.1	Transposon protein, putative, CACTA, En/Spm sub-class
chr6B	648939599	648939976	TRITD6Bv1G209310.1	NAD(P)-binding Rossmann-fold superfamily protein
chr6B	648981419	648981787	TRITD6Bv1G209320.2	Transposase
chr6B	648981697	648982191	TRITD6Bv1G209320.3	Transposon protein, putative, CACTA, En/Spm sub-class
chr6B	649057417	649062937	TRITD6Bv1G209330.1	Vacuolar fusion protein MON1
chr6B	649067411	649067722	TRITD6Bv1G209340.1	SET domain-containing protein
chr6B	649070371	649071252	TRITD6Bv1G209350.1	Transposon protein, putative, CACTA, En/Spm sub-class
chr6B	649072673	649072969	TRITD6Bv1G209360.1	Transposon protein, putative, CACTA, En/Spm sub-class
chr6B	649083442	649083771	TRITD6Bv1G209370.1	Transposon protein, putative, CACTA, En/Spm sub-class
chr6B	649118495	649119106	TRITD6Bv1G209380.1	Translation initiation factor IF-2
chr6B	649144694	649145247	TRITD6Bv1G209390.1	Cinnamyl-alcohol dehydrogenase-like protein
chr6B	649152259	649152630	TRITD6Bv1G209420.1	F-box/LRR protein
chr6B	649156371	649157192	TRITD6Bv1G209400.2	F-box/LRR-repeat protein
chr6B	649186121	649186453	TRITD6Bv1G209430.1	F-box/LRR repeat protein
chr6B	649186923	649187564	TRITD6Bv1G209410.2	F-box/LRR-repeat protein
chr6B	649189744	649190187	TRITD6Bv1G209440.1	4-hydroxy-2-oxoglutarate aldolase, mitochondrial
chr6B	649192974	649194425	TRITD6Bv1G209450.2	F-box/LRR-repeat protein
chr6B	649198430	649198807	TRITD6Bv1G209460.1	Embryogenesis transmembrane protein-like
chr6B	649198859	649199344	TRITD6Bv1G209470.1	Embryogenesis transmembrane protein-like
chr6B	649198881	649199426	TRITD6Bv1G209470.2	Ankyrin repeat family protein
chr6B	649199501	649200199	TRITD6Bv1G209480.1	Ankyrin repeat family protein
chr6B	649199870	649200199	TRITD6Bv1G209480.2	Embryogenesis transmembrane protein-like
chr6B	649200491	649203398	TRITD6Bv1G209490.1	Embryogenesis transmembrane protein-like
chr6B	649287261	649287662	TRITD6Bv1G209500.1	AP2-like ethylene-responsive transcription factor BBM2
chr6B	649315555	649325198	TRITD6Bv1G209510.2	Embryogenesis transmembrane protein-like
chr6B	649319541	649319948	TRITD6Bv1G209520.1	Transposon protein, putative, Pong sub-class
chr6B	649330136	649332793	TRITD6Bv1G209530.1	Embryogenesis transmembrane protein-like
chr6B	649334000	649334500	TRITD6Bv1G209540.1	Ribonuclease H-like superfamily protein
chr6B	649359122	649359523	TRITD6Bv1G209550.1	Cytidine/deoxycytidylate deaminase family protein
chr6B	649376203	649378188	TRITD6Bv1G209560.1	Embryogenesis transmembrane protein-like
chr6B	649378308	649378790	TRITD6Bv1G209570.1	Ankyrin repeat family protein
chr6B	649428926	649429441	TRITD6Bv1G209580.1	Retrovirus-related Pol polyprotein from transposon TNT 1-94
chr6B	649430442	649430933	TRITD6Bv1G209590.1	Retrovirus-related Pol polyprotein from transposon TNT 1-94
chr6B	649435375	649435713	TRITD6Bv1G209600.1	Replicase polyprotein 1a
chr6B	649571622	649572309	TRITD6Bv1G209610.1	SPOC domain / Transcription elongation factor S-II protein
chr6B	649577873	649578685	TRITD6Bv1G209620.1	ABC transporter C family member 14
chr6B	649578152	649580812	TRITD6Bv1G209630.1	Embryogenesis transmembrane protein-like
chr6B	649587249	649590415	TRITD6Bv1G209640.1	Embryogenesis transmembrane protein-like
chr6B	649610565	649610963	TRITD6Bv1G209650.1	Protein downstream neighbor of Son
chr6B	649711963	649712559	TRITD6Bv1G209670.1	Retrovirus-related Pol polyprotein from transposon TNT 1-94
chr6B	649718928	649719581	TRITD6Bv1G209680.1	Embryogenesis transmembrane protein-like
chr6B	649719472	649721031	TRITD6Bv1G209680.2	Embryogenesis transmembrane protein-like
chr6B	649719524	649721031	TRITD6Bv1G209680.3	Embryogenesis transmembrane protein-like
chr6B	650047366	650047983	TRITD6Bv1G209690.1	Embryogenesis transmembrane protein-like
chr6B	650048005	650048325	TRITD6Bv1G209700.1	Glutamate racemase
chr6B	650050230	650231071	TRITD6Bv1G209710.1	Embryogenesis transmembrane protein-like
chr6B	650051188	650052507	TRITD6Bv1G209720.2	Embryogenesis transmembrane protein-like
chr6B	650237823	650238143	TRITD6Bv1G209730.1	Methylthioribulose-1-phosphate dehydratase
chr6B	650301388	650301744	TRITD6Bv1G209740.2	Embryogenesis transmembrane protein-like
chr6B	650302801	650303401	TRITD6Bv1G209750.1	Embryogenesis transmembrane protein-like
chr6B	650303971	650385545	TRITD6Bv1G209760.1	Embryogenesis transmembrane protein-like
chr6B	650311760	650312369	TRITD6Bv1G209770.1	Lanatoside 15-O-acetylesterase
chr6B	650313313	650324249	TRITD6Bv1G209780.1	30S ribosomal protein S5
chr6B	650362282	650364890	TRITD6Bv1G209790.1	Embryogenesis transmembrane protein-like
chr6B	650366143	650366660	TRITD6Bv1G209800.1	NBS-LRR disease resistance protein, putative
chr6B	650371727	650372282	TRITD6Bv1G209810.1	Aquaporin
chr6B	650372292	650373325	TRITD6Bv1G209820.1	Aquaporin
chr6B	650386134	650386535	TRITD6Bv1G209830.1	3beta-hydroxysteroid-dehydrogenase/decarboxylase isoform 2
chr6B	650406403	650408604	TRITD6Bv1G209840.1	Transposon protein, putative, CACTA, En/Spm sub-class
chr6B	650443263	650446023	TRITD6Bv1G209850.2	Embryogenesis transmembrane protein-like
chr6B	650451139	650452632	TRITD6Bv1G209860.1	F-box/LRR-repeat protein
chr6B	650489552	650489902	TRITD6Bv1G209870.1	retrotransposon ORF-1 protein
chr6B	650490127	650961875	TRITD6Bv1G209880.1	Chorismate synthase
chr6B	650554773	650555352	TRITD6Bv1G209890.1	Acetyl-coenzyme A carboxylase carboxyl transferase subunit beta, chloroplastic
chr6B	650555944	650557150	TRITD6Bv1G209900.1	Urocanate hydratase
chr6B	650557231	650559230	TRITD6Bv1G209910.1	WD repeat-containing protein 26
chr6B	650559718	650561343	TRITD6Bv1G209920.1	E3 ubiquitin-protein ligase SINA-like 10
chr6B	650563861	650564232	TRITD6Bv1G209930.1	F-box/LRR protein
chr6B	650620005	650631331	TRITD6Bv1G209970.1	F-box/LRR-repeat protein, putative
chr6B	650631479	650631994	TRITD6Bv1G209980.1	F-box/LRR-repeat protein
chr6B	650632171	650632521	TRITD6Bv1G209990.1	Fumarate reductase subunit C
chr6B	650647039	650650460	TRITD6Bv1G210000.1	Protein phosphatase 2c, putative
chr6B	650650053	650650505	TRITD6Bv1G210010.1	30S ribosomal protein S16
chr6B	650742729	650742983	TRITD6Bv1G210020.1	F-box domain containing protein
chr6B	650748185	650748871	TRITD6Bv1G210040.1	Transposon protein, putative, Mutator sub-class
chr6B	650748906	650749565	TRITD6Bv1G210050.1	Transposon protein, putative, Mutator sub-class
chr6B	650892154	650893626	TRITD6Bv1G210060.1	Glycosyltransferase
chr6B	650946515	650947765	TRITD6Bv1G210070.1	F-box domain containing protein
chr6B	650962877	650963230	TRITD6Bv1G210080.1	Cupredoxin superfamily protein
chr6B	650987470	650987814	TRITD6Bv1G210090.1	Retrovirus-related Pol polyprotein from transposon TNT 1-94
chr6B	650987508	650987900	TRITD6Bv1G210090.2	Retrovirus-related Pol polyprotein from transposon TNT 1-94
chr6B	651013177	651013572	TRITD6Bv1G210100.1	Retrovirus-related Pol polyprotein from transposon 17.6
chr6B	651049452	651049826	TRITD6Bv1G210110.1	Laminin subunit beta-1
chr6B	651061234	651062046	TRITD6Bv1G210120.1	PLAC8 family protein
chr6B	651137459	651137755	TRITD6Bv1G210130.1	Retrovirus-related Pol polyprotein from transposon TNT 1-94
chr6B	651160913	651161239	TRITD6Bv1G210140.1	Zinc finger C-x8-C-x5-C-x3-H type family protein
chr6B	651252904	651253221	TRITD6Bv1G210150.1	Transposable element protein, putative
chr6B	651309518	651313342	TRITD6Bv1G210200.1	Shugoshin-1
chr6B	651322079	651322402	TRITD6Bv1G210210.1	Pol polyprotein
chr6B	651344475	651344909	TRITD6Bv1G210220.1	Retrotransposon protein, putative, Ty3-gypsy subclass
chr6B	651369130	651369729	TRITD6Bv1G210230.1	Pol polyprotein
chr6B	651371859	651372164	TRITD6Bv1G210240.1	SNF2 domain-containing protein / helicase domain-containing protein / zinc finger protein-like protein
chr6B	651398489	651398903	TRITD6Bv1G210250.1	Disease resistance protein (TIR-NBS-LRR class) family
chr6B	651398655	651399014	TRITD6Bv1G210260.1	Acyl-[acyl-carrier-protein] desaturase
chr6B	651400753	651401094	TRITD6Bv1G210270.1	Metabotropic glutamate receptor 6
chr6B	651490350	651490691	TRITD6Bv1G210280.1	AN1-type zinc finger protein 5
chr6B	651491694	651492002	TRITD6Bv1G210290.1	transmembrane protein
chr6B	651496809	651497215	TRITD6Bv1G210300.1	H/ACA ribonucleoprotein complex subunit 2-like protein
chr6B	651509996	651510316	TRITD6Bv1G210310.1	DNA-directed RNA polymerase subunit beta'
chr6B	651560050	651560880	TRITD6Bv1G210320.1	Retrovirus-related Pol polyprotein from transposon TNT 1-94
chr6B	651560138	651561043	TRITD6Bv1G210320.2	evolutionarily conserved C-terminal region 8
chr6B	651567896	651568198	TRITD6Bv1G210350.1	Ubiquitinyl hydrolase 1
chr6B	651578325	651582702	TRITD6Bv1G210360.3	Cytochrome b5 reductase 4
chr6B	651586610	651587464	TRITD6Bv1G210370.1	Polynucleotidyl transferase, ribonuclease H-like superfamily protein
chr6B	651592837	651593379	TRITD6Bv1G210380.1	Retrovirus-related Pol polyprotein from transposon TNT 1-94
chr6B	651598949	651599272	TRITD6Bv1G210390.1	Endonuclease/exonuclease/phosphatase family protein
chr6B	651602345	651602728	TRITD6Bv1G210400.1	Ribosomal protein S12/S23 family protein
chr6B	651834058	651834366	TRITD6Bv1G210410.1	Beta-D-xylosidase 4
chr6B	651839818	651840231	TRITD6Bv1G210420.1	F420H(2)-dependent quinone reductase Rv1558
chr6B	651970797	651971402	TRITD6Bv1G210430.1	Retrovirus-related Pol polyprotein from transposon TNT 1-94
chr6B	651996114	651997040	TRITD6Bv1G210440.1	Transposon protein, putative, CACTA, En/Spm sub-class
chr6B	651997184	651997924	TRITD6Bv1G210450.1	Transposon protein, putative, CACTA, En/Spm sub-class
chr6B	652096822	652101523	TRITD6Bv1G210460.1	Transmembrane protein
chr6B	652102226	652110586	TRITD6Bv1G210470.1	Serine/threonine-protein kinase
chr6B	652181353	652181757	TRITD6Bv1G210480.1	transmembrane protein, putative (DUF594)
chr6B	652181741	652182307	TRITD6Bv1G210480.2	transmembrane protein, putative (DUF594)
chr6B	652182929	652183504	TRITD6Bv1G210490.1	transmembrane protein, putative (DUF594)
chr6B	652250571	652251032	TRITD6Bv1G210500.1	Serine-rich protein
chr6B	652253300	652253689	TRITD6Bv1G210510.1	Transposon protein, putative, Mutator sub-class
chr6B	652295651	652296148	TRITD6Bv1G210520.1	Serine-rich protein
chr6B	652297123	652297683	TRITD6Bv1G210530.1	EGF domain-specific O-linked N-acetylglucosamine transferase
chr6B	652317614	652317919	TRITD6Bv1G210540.1	Homeobox-leucine zipper protein ATHB-5
chr6B	652319018	652319356	TRITD6Bv1G210550.1	Retrotransposon protein, putative, Ty3-gypsy subclass
chr6B	652344087	652344419	TRITD6Bv1G210560.1	Transposon protein, putative, CACTA, En/Spm sub-class
chr6B	652369417	652369824	TRITD6Bv1G210570.1	SHV3-like 2
chr6B	652379157	652379471	TRITD6Bv1G210580.1	Retrovirus-related Pol polyprotein from transposon TNT 1-94
chr6B	652394270	652394680	TRITD6Bv1G210590.1	Retrovirus-related Pol polyprotein from transposon TNT 1-94
chr6B	652470669	652471106	TRITD6Bv1G210600.1	Ribose-5-phosphate isomerase A
chr6B	652535699	652536150	TRITD6Bv1G210610.1	Pyrophosphate--fructose 6-phosphate 1-phosphotransferase subunit alpha
chr6B	652639417	652639755	TRITD6Bv1G210620.1	Trans-2,3-enoyl-CoA reductase
chr6B	652660921	652661523	TRITD6Bv1G210630.1	Transposon protein, putative, CACTA, En/Spm sub-class
chr6B	652661539	652663116	TRITD6Bv1G210640.1	Transposon protein, putative, CACTA, En/Spm sub-class
chr6B	652684820	652685155	TRITD6Bv1G210650.1	Derlin
chr6B	652685630	652686091	TRITD6Bv1G210660.1	Serine-rich protein
chr6B	652760636	652761124	TRITD6Bv1G210700.1	Serine-rich protein
chr6B	652768169	652768642	TRITD6Bv1G210710.1	Serine-rich protein
chr6B	652970924	652971781	TRITD6Bv1G210740.1	Transposon protein, putative, Pong sub-class
chr6B	652999171	652999515	TRITD6Bv1G210750.1	Translation initiation factor IF-2
chr6B	653087467	653088294	TRITD6Bv1G210760.1	integrator complex subunit
chr6B	653087788	653088291	TRITD6Bv1G210770.1	Serine-rich protein
chr6B	653238066	653238440	TRITD6Bv1G210780.1	Transposase
chr6B	653271192	653271461	TRITD6Bv1G210790.1	Adhesion G protein-coupled receptor L3
chr6B	653289800	653290801	TRITD6Bv1G210800.1	Retrovirus-related Pol polyprotein from transposon TNT 1-94
chr6B	653429502	653430029	TRITD6Bv1G210810.1	Serine-rich protein
chr6B	653472285	653472788	TRITD6Bv1G210820.1	Retrotransposon protein, putative, unclassified
chr6B	653528835	653529518	TRITD6Bv1G210830.1	Transposon protein, putative, CACTA, En/Spm sub-class
chr6B	653622838	653920816	TRITD6Bv1G210880.1	Envelope glycoprotein D
chr6B	653672317	653672859	TRITD6Bv1G210890.1	Serine-rich protein
chr6B	653731792	653732301	TRITD6Bv1G210900.1	Transposase for transposon Tn5
chr6B	653731997	653732350	TRITD6Bv1G210900.2	Disease resistance protein RPM1
chr6B	654067021	654067523	TRITD6Bv1G210910.1	Ubiquitin-like-specific protease ESD4
chr6B	654076840	654077533	TRITD6Bv1G210920.1	Calcineurin B-like protein
chr6B	654077931	654078358	TRITD6Bv1G210930.1	Electron transfer flavoprotein beta-subunit
chr6B	654168853	654169080	TRITD6Bv1G210940.1	Eukaryotic peptide chain release factor subunit 1-3
chr6B	654172493	654173095	TRITD6Bv1G210950.1	Transposon protein, putative, CACTA, En/Spm sub-class
chr6B	654250200	654250517	TRITD6Bv1G210960.1	Transposon protein, putative, mutator sub-class
chr6B	654370264	654370779	TRITD6Bv1G210970.1	Transposon protein, putative, CACTA, En/Spm sub-class
chr6B	654395854	654396354	TRITD6Bv1G210980.1	ArfGap/RecO-like zinc finger domain-containing protein
chr6B	654407136	654407444	TRITD6Bv1G210990.1	Transposon Ty3-I Gag-Pol polyprotein
chr6B	654495376	654495774	TRITD6Bv1G211000.1	Transposon protein, putative, CACTA, En/Spm sub-class
chr6B	654495568	654495936	TRITD6Bv1G211000.2	Transposon protein, putative, CACTA, En/Spm sub-class
chr6B	654500512	654500811	TRITD6Bv1G211010.1	Transposon protein, putative, CACTA, En/Spm sub-class
chr6B	654507187	654507672	TRITD6Bv1G211020.1	Retrovirus-related Pol polyprotein from transposon TNT 1-94
chr6B	654583069	654583584	TRITD6Bv1G211030.1	Transposon protein, putative, mutator sub-class
chr6B	654673434	654673970	TRITD6Bv1G211040.1	Serine-rich protein
chr6B	654673456	654673911	TRITD6Bv1G211050.1	3-isopropylmalate dehydratase small subunit
chr6B	654694657	654694998	TRITD6Bv1G211060.1	Zinc finger MYM-type protein 1
chr6B	654702282	654702962	TRITD6Bv1G211070.1	Major facilitator superfamily protein
chr6B	654702282	654703495	TRITD6Bv1G211070.2	Protein NRT1/ PTR FAMILY 5.10
chr6B	654702282	654704801	TRITD6Bv1G211070.3	Calmodulin-binding family protein, putative, expressed
chr6B	654702543	654704379	TRITD6Bv1G211070.4	Major facilitator superfamily protein
chr6B	654703122	654703508	TRITD6Bv1G211080.1	Protein serine/threonine phosphatase 2C
chr6B	654703512	654704379	TRITD6Bv1G211070.5	Unknown protein
chr6B	654703512	654704801	TRITD6Bv1G211070.6	Calmodulin-binding family protein, putative, expressed
chr6B	654703955	654704551	TRITD6Bv1G211090.1	Tudor/PWWP/MBT superfamily protein
chr6B	654703955	654704551	TRITD6Bv1G211090.2	Tudor/PWWP/MBT superfamily protein
chr6B	654704376	654704801	TRITD6Bv1G211070.7	Calmodulin-binding family protein, putative, expressed
chr6B	654705129	654705482	TRITD6Bv1G211100.1	Urease subunit beta
chr6B	654736315	654736626	TRITD6Bv1G211110.1	Retrotransposon protein, putative, unclassified
chr6B	654758194	654758730	TRITD6Bv1G211120.1	Serine-rich protein
chr6B	654758253	654758708	TRITD6Bv1G211130.1	3-isopropylmalate dehydratase small subunit
chr6B	654758910	654759119	TRITD6Bv1G211140.1	NACHT, LRR and PYD domains-containing protein 4
chr6B	654874135	654875128	TRITD6Bv1G211150.1	Ubiquinol-cytochrome C chaperone protein
chr6B	654888955	654889251	TRITD6Bv1G211160.1	Retrotransposon protein, putative, unclassified, expressed
chr6B	654947519	654948049	TRITD6Bv1G211170.1	Serine-rich protein
chr6B	655012744	655013475	TRITD6Bv1G211180.1	Retrotransposon protein, putative, Ty3-gypsy subclass
chr6B	655037292	655037642	TRITD6Bv1G211190.1	Reverse transcriptase
chr6B	655120709	655121551	TRITD6Bv1G211200.1	Sec-independent protein translocase protein TATC, chloroplastic
chr6B	655144443	655144790	TRITD6Bv1G211210.1	Retrovirus-related Pol polyprotein from transposon TNT 1-94
chr6B	655205620	655207983	TRITD6Bv1G211220.8	Bifunctional nuclease
chr6B	655230454	655231497	TRITD6Bv1G211230.1	Retrovirus-related Pol polyprotein from transposon TNT 1-94
chr6B	655238383	655243204	TRITD6Bv1G211240.1	CobW-domain-containing protein
chr6B	655258287	655261308	TRITD6Bv1G211280.2	Proteasome maturation factor UMP1 family protein
chr6B	655268180	655269760	TRITD6Bv1G211290.1	LINE-1 reverse transcriptase like
chr6B	655270129	655270809	TRITD6Bv1G211300.1	RNA-directed DNA polymerase (Reverse transcriptase)-related family protein
chr6B	655318477	655322455	TRITD6Bv1G211310.1	Heparanase
chr6B	655327609	655328391	TRITD6Bv1G211320.1	BTB/POZ domain containing protein, expressed
chr6B	655338332	655338745	TRITD6Bv1G211330.1	Reverse transcriptase
chr6B	655372904	655373812	TRITD6Bv1G211340.1	Ycf68
chr6B	655372904	655373812	TRITD6Bv1G211340.2	Ycf68
chr6B	655372937	655373826	TRITD6Bv1G211340.3	Ycf68
chr6B	655379409	655380587	TRITD6Bv1G211350.1	F-box domain containing protein
chr6B	655390746	655391594	TRITD6Bv1G211360.1	Phenyloxazoline synthase MbtB
chr6B	655409426	655409833	TRITD6Bv1G211370.1	Retrovirus-related Pol polyprotein from transposon TNT 1-94
chr6B	655443767	655444120	TRITD6Bv1G211380.1	DLA class II histocompatibility antigen, DR-1 beta chain
chr6B	655444014	655444592	TRITD6Bv1G211380.2	U3 small nucleolar RNA-associated protein 18-like protein
chr6B	655463178	655463981	TRITD6Bv1G211390.1	U3 small nucleolar RNA-associated protein 18-like protein
chr6B	655463818	655464123	TRITD6Bv1G211400.1	Bifunctional protein Aas
chr6B	655480449	655480820	TRITD6Bv1G211410.1	Gag-pol polyprotein
chr6B	655484983	655485525	TRITD6Bv1G211420.1	Retrotransposon protein, putative, Ty3-gypsy subclass
chr6B	655485745	655486272	TRITD6Bv1G211430.1	Retrotransposon protein, putative, unclassified
chr6B	655489717	655490585	TRITD6Bv1G211440.1	P-glycoprotein 6
chr6B	655490187	655490642	TRITD6Bv1G211440.2	P-glycoprotein 6
chr6B	655491027	655492321	TRITD6Bv1G211450.1	Retrotransposon protein, putative, unclassified
chr6B	655502761	655504038	TRITD6Bv1G211460.1	F-box and associated interaction domains-containing protein
chr6B	655506362	655506661	TRITD6Bv1G211470.1	Regulator of chromosome condensation (RCC1) family with FYVE zinc finger domain-containing protein
chr6B	655532254	655533648	TRITD6Bv1G211480.1	Transposon protein, putative, CACTA, En/Spm sub-class
chr6B	655625042	655625506	TRITD6Bv1G211490.1	Transposon protein, putative, CACTA, En/Spm sub-class
chr6B	655632776	655633231	TRITD6Bv1G211500.1	Retrovirus-related Pol polyprotein from transposon TNT 1-94
chr6B	655702251	655702727	TRITD6Bv1G211510.1	Retrovirus-related Pol polyprotein from transposon TNT 1-94
chr6B	655765553	655765894	TRITD6Bv1G211520.1	Gag-pol polyprotein
chr6B	655790896	655791249	TRITD6Bv1G211530.1	Transposon protein, putative, CACTA, En/Spm sub-class
chr6B	655850739	655851128	TRITD6Bv1G211540.1	Transposon protein, putative, CACTA, En/Spm sub-class
chr6B	655862939	655865211	TRITD6Bv1G211550.2	Calcineurin B-like protein
chr6B	655866053	655867138	TRITD6Bv1G211560.2	BTB/POZ domain containing protein, expressed
chr6B	655867296	655867916	TRITD6Bv1G211570.1	Dehydrogenase/reductase SDR family member 9
chr6B	655867296	655868286	TRITD6Bv1G211570.2	Dehydrogenase/reductase SDR family member 9
chr6B	655871360	655871821	TRITD6Bv1G211580.1	Transposon protein, putative, Mutator sub-class, expressed
chr6B	655872827	655873189	TRITD6Bv1G211590.1	Transposon protein, putative, Mutator sub-class
chr6B	655873171	655874166	TRITD6Bv1G211590.2	Transposon protein, putative, Mutator sub-class, expressed
chr6B	655874593	655874907	TRITD6Bv1G211600.1	P-loop containing nucleoside triphosphate hydrolases superfamily protein
chr6B	655879441	655879857	TRITD6Bv1G211610.1	Aspartyl/glutamyl-tRNA(Asn/Gln) amidotransferase subunit B
chr6B	655901244	655901690	TRITD6Bv1G211620.1	BTB/POZ domain containing protein, expressed
chr6B	655901321	655901638	TRITD6Bv1G211630.1	SNOWY COTYLEDON protein (DUF566)
chr6B	655907481	655908554	TRITD6Bv1G211640.1	BTB/POZ domain containing protein, expressed
chr6B	655908755	655909057	TRITD6Bv1G211650.1	acyl-activating enzyme 14
chr6B	655919080	655919418	TRITD6Bv1G211660.1	RNA-directed DNA polymerase (reverse transcriptase)-related family protein
chr6B	655919521	655920348	TRITD6Bv1G211670.1	LINE-1 reverse transcriptase
chr6B	655920825	655922174	TRITD6Bv1G211680.1	Retrotransposon protein, putative, unclassified
chr6B	655922515	655924941	TRITD6Bv1G211690.1	Gag polyprotein
chr6B	655926828	655927154	TRITD6Bv1G211700.1	Retrotransposon protein, putative, Ty3-gypsy subclass
chr6B	655940435	655940983	TRITD6Bv1G211710.1	Gypsy/Ty3 element polyprotein, putative
chr6B	655950859	655951161	TRITD6Bv1G211720.1	acyl-activating enzyme 14
chr6B	655951362	655952435	TRITD6Bv1G211730.1	BTB/POZ domain containing protein, expressed
chr6B	656046426	656046929	TRITD6Bv1G211740.1	Mitochondrial import inner membrane translocase subunit Tim17
chr6B	656055857	656056804	TRITD6Bv1G211750.1	F-box family protein
chr6B	656061454	656062061	TRITD6Bv1G211760.1	Peptidyl-prolyl cis-trans isomerase E
chr6B	656068184	656068765	TRITD6Bv1G211770.1	Receptor-like protein kinase
chr6B	656082734	656083123	TRITD6Bv1G211780.1	Retrovirus-related Pol polyprotein from transposon opus
chr6B	656083871	656084179	TRITD6Bv1G211790.1	conserved telomere maintenance component 1
chr6B	656095679	656096158	TRITD6Bv1G211800.1	Retrovirus-related Pol polyprotein from transposon TNT 1-94
chr6B	656135094	656135420	TRITD6Bv1G211810.1	spindle pole body-associated protein
chr6B	656152522	656152893	TRITD6Bv1G211820.1	Haptoglobin
chr6B	656168643	656168957	TRITD6Bv1G211830.1	Retrovirus-related Pol polyprotein from transposon TNT 1-94
chr6B	656169409	656169765	TRITD6Bv1G211840.1	Retrovirus-related Pol polyprotein from transposon TNT 1-94
chr6B	656285945	656286256	TRITD6Bv1G211850.1	Histone H4
chr6B	656309058	656309411	TRITD6Bv1G211860.1	translation initiation factor
chr6B	656383566	656387395	TRITD6Bv1G211870.1	RNA binding
chr6B	656464402	656470972	TRITD6Bv1G211880.1	protein kinase family protein
chr6B	656478194	656478673	TRITD6Bv1G211890.1	Transposase
chr6B	656610637	656611441	TRITD6Bv1G211910.1	Monogalactosyldiacylglycerol synthase
chr6B	656612508	656614682	TRITD6Bv1G211920.1	UDP-N-acetylglucosamine--N-acetylmuramyl-(Pentapeptide) pyrophosphoryl-undecaprenol N-acetylglucosamine transferase
chr6B	656615389	656618338	TRITD6Bv1G211930.1	Glutamate 5-kinase
chr6B	656654951	656655556	TRITD6Bv1G211940.1	Retrovirus-related Pol polyprotein from transposon TNT 1-94
chr6B	656656862	656657254	TRITD6Bv1G211950.1	Retrovirus-related Pol polyprotein from transposon TNT 1-94
chr6B	656671125	656671577	TRITD6Bv1G211960.1	Pol polyprotein
chr6B	656716979	656717296	TRITD6Bv1G211970.1	Retrovirus-related Pol polyprotein from transposon TNT 1-94
chr6B	656775276	656778067	TRITD6Bv1G211980.1	30S ribosomal protein S15
chr6B	656775429	656778067	TRITD6Bv1G211980.2	30S ribosomal protein S15
chr6B	656775429	656778067	TRITD6Bv1G211980.3	30S ribosomal protein S15
chr6B	656816435	656816878	TRITD6Bv1G211990.1	Retrotransposon protein, putative, unclassified
chr6B	656825905	656829421	TRITD6Bv1G212000.1	Protein FAR1-RELATED SEQUENCE 5
chr6B	656825905	656829421	TRITD6Bv1G212000.2	Protein FAR1-RELATED SEQUENCE 5
chr6B	656832661	656835615	TRITD6Bv1G212010.1	F-box family protein
chr6B	656839776	656840259	TRITD6Bv1G212020.1	Transposase
chr6B	656844597	656854013	TRITD6Bv1G212030.3	N-alpha-acetyltransferase 35, NatC auxiliary subunit
chr6B	656869841	656870149	TRITD6Bv1G212040.1	Retrovirus-related Pol polyprotein from transposon TNT 1-94
chr6B	656896657	656900008	TRITD6Bv1G212050.1	mediator of RNA polymerase II transcription subunit-like protein
chr6B	656949135	656949992	TRITD6Bv1G212060.1	Chaperonin 60 subunit beta 1, chloroplastic
chr6B	656973620	656973991	TRITD6Bv1G212070.1	Reverse transcriptase
chr6B	656974205	656974618	TRITD6Bv1G212080.1	Retrovirus-related Pol polyprotein from transposon TNT 1-94
chr6B	657004170	657006635	TRITD6Bv1G212090.4	F-box family protein
chr6B	657007443	657010078	TRITD6Bv1G212100.1	F-box family protein
chr6B	657027374	657028723	TRITD6Bv1G212110.1	GDSL esterase/lipase
chr6B	657029621	657032520	TRITD6Bv1G212120.1	Rhomboid family protein
chr6B	657033238	657033588	TRITD6Bv1G212130.1	Solute carrier family 12 member 3
chr6B	657035848	657036203	TRITD6Bv1G212150.1	CAP-gly domain linker
chr6B	657038345	657039985	TRITD6Bv1G212140.5	F-box family protein
chr6B	657074229	657074426	TRITD6Bv1G212160.1	Transient receptor potential cation channel subfamily M member 5
chr6B	657078672	657080245	TRITD6Bv1G212170.1	F-box family protein
chr6B	657082669	657084332	TRITD6Bv1G212180.1	Flavonoid 3'-hydroxylase
chr6B	657093781	657095412	TRITD6Bv1G212190.1	Alcohol dehydrogenase, putative
chr6B	657093781	657098234	TRITD6Bv1G212190.2	Alcohol dehydrogenase, putative
chr6B	657093941	657098219	TRITD6Bv1G212190.3	Alcohol dehydrogenase, putative
chr6B	657094068	657094683	TRITD6Bv1G212200.1	Zinc uptake system ATP-binding protein ZurA
chr6B	657094652	657095182	TRITD6Bv1G212190.4	Alcohol dehydrogenase, putative
chr6B	657112105	657114390	TRITD6Bv1G212210.4	Peptide transporter
chr6B	657114532	657120155	TRITD6Bv1G212220.1	F-box family protein
chr6B	657116112	657116983	TRITD6Bv1G212230.1	F-box domain containing protein
chr6B	657119571	657120155	TRITD6Bv1G212220.2	F-box family protein
chr6B	657127349	657128103	TRITD6Bv1G212240.1	histidinol dehydrogenase
chr6B	657181703	657186288	TRITD6Bv1G212250.3	Alcohol dehydrogenase, putative
chr6B	657214914	657216528	TRITD6Bv1G212260.1	Flavonoid 3'-hydroxylase
chr6B	657250097	657311323	TRITD6Bv1G212270.10	F-box family protein
chr6B	657253119	657253451	TRITD6Bv1G212280.1	Potassium transporter
chr6B	657282667	657284793	TRITD6Bv1G212290.1	transmembrane protein, putative (DUF594)
chr6B	657337072	657337371	TRITD6Bv1G212300.1	RHOMBOID-like protein 6
chr6B	657339161	657339472	TRITD6Bv1G212310.1	50S ribosomal protein L11
chr6B	657339409	657339777	TRITD6Bv1G212310.2	Retrovirus-related Pol polyprotein LINE-1
chr6B	657356775	657402978	TRITD6Bv1G212320.1	Transposon protein, putative, Pong sub-class
chr6B	657395568	657397213	TRITD6Bv1G212330.1	F-box domain containing protein, expressed
chr6B	657404118	657407625	TRITD6Bv1G212340.4	Acetamidase/formamidase, putative
chr6B	657523786	657526168	TRITD6Bv1G212350.1	F-box family protein
chr6B	657540567	657575411	TRITD6Bv1G212360.1	Cytochrome P450 family protein, expressed
chr6B	657582699	657583013	TRITD6Bv1G212370.1	50S ribosomal protein L27
chr6B	657631357	657685169	TRITD6Bv1G212380.1	Cytochrome P450 family protein, expressed
chr6B	657640373	657641872	TRITD6Bv1G212390.1	Retrotransposon protein, putative, Ty1-copia subclass
chr6B	657644181	657644483	TRITD6Bv1G212400.1	AP2-like ethylene-responsive transcription factor BBM2
chr6B	657644565	657646085	TRITD6Bv1G212410.1	Retrovirus-related Pol polyprotein from transposon TNT 1-94
chr6B	657855715	657856218	TRITD6Bv1G212420.1	Ribosomal protein S3
chr6B	657856339	657856716	TRITD6Bv1G212430.1	Ribosomal protein S3
chr6B	657861621	657862148	TRITD6Bv1G212440.1	50S ribosomal protein L16
chr6B	657923631	657924032	TRITD6Bv1G212450.1	Transposon protein, putative, CACTA, En/Spm sub-class
chr6B	658015016	658015615	TRITD6Bv1G212460.1	Transposon protein, putative, CACTA, En/Spm sub-class
chr6B	658146177	658148237	TRITD6Bv1G212470.1	F-box family protein
chr6B	658225876	658226241	TRITD6Bv1G212490.1	TTF-type zinc finger protein with HAT dimerisation domain
chr6B	658226374	658227662	TRITD6Bv1G212500.1	zinc finger MYM-type-like protein
chr6B	658226563	658227662	TRITD6Bv1G212500.2	zinc finger MYM-type-like protein
chr6B	658236411	658239814	TRITD6Bv1G212510.8	ENTH/ANTH/VHS superfamily protein
chr6B	658239425	658239697	TRITD6Bv1G212520.1	Unknown protein
chr6B	658240113	658240430	TRITD6Bv1G212530.1	2-oxoglutarate decarboxylase/hydro-lyase/magnesium ion-binding protein
chr6B	658240741	658241106	TRITD6Bv1G212540.1	Cell division protein FtsB
chr6B	658240816	658241909	TRITD6Bv1G212550.1	Vacuolar protein sorting 55 containing protein
chr6B	658245739	658247547	TRITD6Bv1G212560.1	F-box family protein
chr6B	658285763	658286107	TRITD6Bv1G212570.1	Retrotransposon protein, putative, Ty3-gypsy subclass
chr6B	658297958	658298329	TRITD6Bv1G212580.1	NAC domain-containing protein 21/22
chr6B	658379430	658379780	TRITD6Bv1G212590.1	Retrovirus-related Pol polyprotein from transposon TNT 1-94
chr6B	658434861	658438356	TRITD6Bv1G212600.1	Anaphase-promoting complex subunit 10
chr6B	658625923	658628416	TRITD6Bv1G212610.1	Aspartic proteinase nepenthesin-1
chr6B	658628076	658628348	TRITD6Bv1G212610.2	zein-binding protein (Protein of unknown function, DUF593)
chr6B	658630407	658634176	TRITD6Bv1G212620.1	Anaphase-promoting complex subunit 10
chr6B	658632264	658634121	TRITD6Bv1G212620.5	KH domain-containing protein / zinc finger family protein isoform 2
chr6B	658632575	658633230	TRITD6Bv1G212630.1	Unknown protein
chr6B	658633834	658634121	TRITD6Bv1G212620.6	B-box type zinc finger protein with CCT domain-containing protein
chr6B	658733262	658734978	TRITD6Bv1G212640.1	F-box family protein
chr6B	658764778	658765185	TRITD6Bv1G212650.1	Retrotransposon protein, putative, Ty3-gypsy subclass
chr6B	658851894	658852214	TRITD6Bv1G212660.1	Dirigent protein 5
chr6B	658863186	658868652	TRITD6Bv1G212670.5	Aldehyde dehydrogenase
chr6B	658869066	658869383	TRITD6Bv1G212680.1	Respiratory burst oxidase-A
chr6B	658872056	658874210	TRITD6Bv1G212690.1	Pentatricopeptide repeat-containing protein
chr6B	658879683	658880075	TRITD6Bv1G212700.1	Retrotransposon protein, putative, unclassified
chr6B	658903261	658903500	TRITD6Bv1G212710.1	Little zipper protein
chr6B	658962390	658962809	TRITD6Bv1G212720.1	Retrovirus-related Pol polyprotein from transposon TNT 1-94
chr6B	658974868	658976790	TRITD6Bv1G212730.1	F-box family protein
chr6B	658983882	658984458	TRITD6Bv1G212740.1	Two-component response regulator ORR29
chr6B	658984465	658985181	TRITD6Bv1G212750.1	Two-component response regulator
chr6B	658986052	658986728	TRITD6Bv1G212760.1	Two-component response regulator-like protein
chr6B	658989635	658990024	TRITD6Bv1G212770.1	F-box family protein
chr6B	659010474	659021310	TRITD6Bv1G212790.1	F-box family protein
chr6B	659030337	659033609	TRITD6Bv1G212780.5	Two-component response regulator
chr6B	659055968	659056831	TRITD6Bv1G212800.1	F-box family protein
chr6B	659120706	659121071	TRITD6Bv1G212810.1	Retrovirus-related Pol polyprotein from transposon TNT 1-94
chr6B	659217393	659217713	TRITD6Bv1G212820.1	Transposon protein, putative, CACTA, En/Spm sub-class
chr6B	659226890	659227411	TRITD6Bv1G212830.1	Transposase
chr6B	659346567	659347016	TRITD6Bv1G212840.1	RNA-directed DNA polymerase (Reverse transcriptase)-related family protein
chr6B	659470661	659480880	TRITD6Bv1G212850.1	Serine/threonine-protein phosphatase 7 long form like
chr6B	659485843	659486193	TRITD6Bv1G212860.1	Protein FAR1-RELATED SEQUENCE 5
chr6B	659516524	659516727	TRITD6Bv1G212870.1	Transposon protein, putative, unclassified
chr6B	659523302	659526520	TRITD6Bv1G212880.1	DNA-directed RNA polymerase subunit gamma
chr6B	659523302	659526520	TRITD6Bv1G212880.2	DNA-directed RNA polymerase subunit gamma
chr6B	659523302	659526612	TRITD6Bv1G212880.3	DNA-directed RNA polymerase subunit gamma
chr6B	659532483	659532797	TRITD6Bv1G212890.1	Multidrug resistance protein MdtA
chr6B	659656893	659657231	TRITD6Bv1G212900.1	Aconitate hydratase
chr6B	659671926	659672612	TRITD6Bv1G212910.1	Retrotransposon protein, putative, unclassified
chr6B	659674465	659674920	TRITD6Bv1G212920.1	Gag-Pol polyprotein
chr6B	659682690	659684036	TRITD6Bv1G212930.1	Eukaryotic aspartyl protease family protein
chr6B	659724913	659725287	TRITD6Bv1G212940.1	Retrovirus-related Pol polyprotein from transposon TNT 1-94
chr6B	659725954	659726385	TRITD6Bv1G212950.1	Retrovirus-related Pol polyprotein from transposon TNT 1-94
chr6B	659733566	659734468	TRITD6Bv1G212960.1	Retrovirus-related Pol polyprotein from transposon TNT 1-94
chr6B	659756639	659757627	TRITD6Bv1G212970.1	Aspartate--tRNA ligase
chr6B	659756639	659758118	TRITD6Bv1G212970.2	Aspartate--tRNA ligase
chr6B	659756639	659758141	TRITD6Bv1G212970.3	Aspartate--tRNA ligase
chr6B	659808566	659809474	TRITD6Bv1G212980.2	Thioredoxin
chr6B	659873416	659876611	TRITD6Bv1G212990.3	Mannose-P-dolichol utilization defect 1 protein
chr6B	660184895	660186392	TRITD6Bv1G213000.1	Werner Syndrome-like exonuclease
chr6B	660203864	660205605	TRITD6Bv1G213010.1	26S protease regulatory subunit-like protein
chr6B	660214004	660214216	TRITD6Bv1G213020.1	Unknown protein
chr6B	660386875	660387570	TRITD6Bv1G213030.1	Ribosome maturation factor RimM
chr6B	660387023	660387343	TRITD6Bv1G213030.2	BUB1-related (BUB1: budding uninhibited by benzymidazol 1)
chr6B	660387564	660388413	TRITD6Bv1G213030.3	F-box family protein
chr6B	660387767	660388386	TRITD6Bv1G213030.4	F-box family protein
chr6B	660389940	660390388	TRITD6Bv1G213040.1	Obg-like ATPase 1
chr6B	660391712	660397109	TRITD6Bv1G213050.1	Ubiquitin-like-specific protease ESD4
chr6B	660465790	660472041	TRITD6Bv1G213060.2	Vesicle-associated membrane protein
chr6B	660532102	660532437	TRITD6Bv1G213070.1	Retrotransposon protein, putative, unclassified, expressed
chr6B	660532422	660532754	TRITD6Bv1G213070.2	Retrotransposon protein, putative, unclassified
chr6B	660533109	660533558	TRITD6Bv1G213080.1	RNA-directed DNA polymerase (Reverse transcriptase)
chr6B	660536534	660536839	TRITD6Bv1G213090.1	DNA replication helicase
chr6B	660537462	660539784	TRITD6Bv1G213100.1	Exodeoxyribonuclease 7 large subunit
chr6B	660537462	660539824	TRITD6Bv1G213100.2	Peroxisomal multifunctional enzyme type 2
chr6B	660537462	660539824	TRITD6Bv1G213100.3	G-type lectin S-receptor-like Serine/Threonine-kinase
chr6B	660537462	660539928	TRITD6Bv1G213100.4	Squamosa promoter-binding protein-like (SBP domain) transcription factor family protein
chr6B	660547310	660548682	TRITD6Bv1G213110.1	F-box family protein
chr6B	660627820	660628125	TRITD6Bv1G213120.1	Phenylalanine--tRNA ligase alpha subunit
chr6B	660631986	660636911	TRITD6Bv1G213130.1	Ribonucleoside-diphosphate reductase
chr6B	660736275	660736472	TRITD6Bv1G213140.1	Protein phosphatase 2C family protein
chr6B	660792537	660800224	TRITD6Bv1G213150.2	Chaperone protein dnaJ
chr6B	660800823	660801302	TRITD6Bv1G213160.1	Serine/threonine-protein kinase Nek8
chr6B	660862004	660868707	TRITD6Bv1G213170.2	Aspartic proteinase
chr6B	660872670	660875641	TRITD6Bv1G213180.1	Poly [ADP-ribose] polymerase
chr6B	660888253	660889264	TRITD6Bv1G213190.1	Splicing factor 3B subunit 2
chr6B	660888253	660889264	TRITD6Bv1G213190.2	Splicing factor 3B subunit 2
chr6B	660888336	660889164	TRITD6Bv1G213190.3	Splicing factor 3B subunit 2
chr6B	660892216	660894741	TRITD6Bv1G213200.2	Pentatricopeptide repeat-containing protein
chr6B	660916655	660918870	TRITD6Bv1G213230.2	Methyltransferase-like protein
chr6B	661012962	661013950	TRITD6Bv1G213240.1	Aspartate--tRNA ligase
chr6B	661054027	661054368	TRITD6Bv1G213250.1	50S ribosomal protein L2, chloroplastic
chr6B	661056761	661057126	TRITD6Bv1G213260.1	Zinc finger CCCH domain-containing protein 40
chr6B	661061433	661062034	TRITD6Bv1G213270.1	F-box domain containing protein, expressed
chr6B	661077275	661077814	TRITD6Bv1G213280.1	3-dehydroquinate dehydratase
chr6B	661077774	661078127	TRITD6Bv1G213280.2	Phosphomethylpyrimidine synthase
chr6B	661227982	661239503	TRITD6Bv1G213290.4	AP-1 complex subunit gamma-2
chr6B	661289144	661293887	TRITD6Bv1G213320.1	Exportin-1
chr6B	661294408	661294794	TRITD6Bv1G213330.1	Bifunctional inhibitor/lipid-transfer protein/seed storage 2S albumin superfamily protein
chr6B	661312870	661313304	TRITD6Bv1G213340.1	Sugar transport protein 5
chr6B	661317837	661318492	TRITD6Bv1G213350.2	Auxin-responsive protein
chr6B	661355479	661355919	TRITD6Bv1G213360.1	Cytochrome b6-F complex subunit 4
chr6B	661450579	661452234	TRITD6Bv1G213370.2	Proliferating cell nuclear antigen
chr6B	661456206	661456589	TRITD6Bv1G213380.1	Protoheme IX farnesyltransferase
chr6B	661457797	661458570	TRITD6Bv1G213390.1	Transposable element protein, putative, Retrotrans_gag
chr6B	661458591	661458989	TRITD6Bv1G213400.1	ATP-dependent helicase/deoxyribonuclease subunit B
chr6B	661458962	661459417	TRITD6Bv1G213400.2	Malate dehydrogenase, cytoplasmic
chr6B	661459462	661461812	TRITD6Bv1G213410.1	Eukaryotic translation initiation factor 5A
chr6B	661506156	661508743	TRITD6Bv1G213440.1	basic helix-loop-helix (bHLH) DNA-binding superfamily protein
chr6B	661514216	661515310	TRITD6Bv1G213450.1	F-box family protein
chr6B	661547253	661547582	TRITD6Bv1G213460.1	Retrovirus-related Pol polyprotein from transposon TNT 1-94
chr6B	661595870	661596208	TRITD6Bv1G213470.1	Retrotransposon protein, putative, unclassified
chr6B	661610160	661611326	TRITD6Bv1G213480.1	F-box/kelch-repeat protein
chr6B	661612076	661614266	TRITD6Bv1G213490.1	3(2),5-bisphosphate nucleotidase HAL2
chr6B	661634727	661635113	TRITD6Bv1G213500.1	Retrovirus-related Pol polyprotein from transposon TNT 1-94
chr6B	661637672	661639449	TRITD6Bv1G213510.1	Oxidoreductase family protein
chr6B	661642056	661643952	TRITD6Bv1G213520.1	Alcohol dehydrogenase 3
chr6B	661642560	661642925	TRITD6Bv1G213530.1	30S ribosomal protein S4, chloroplastic
chr6B	661643205	661643528	TRITD6Bv1G213540.1	terpenoid synthase superfamily protein
chr6B	661645240	661646551	TRITD6Bv1G213550.2	Myosin-1
chr6B	661646996	661651068	TRITD6Bv1G213560.3	Esterase/lipase/thioesterase-like protein
chr6B	661650763	661651146	TRITD6Bv1G213570.1	FUMARASE 2
chr6B	661651213	661657049	TRITD6Bv1G213580.3	Protein kinase superfamily protein
chr6B	661682029	661682445	TRITD6Bv1G213590.1	Retrotransposon protein, putative, Ty3-gypsy subclass
chr6B	661721525	661721863	TRITD6Bv1G213600.1	Retrotransposon protein, putative, Ty3-gypsy subclass
chr6B	661760446	661760922	TRITD6Bv1G213610.1	Retrotransposon protein, putative, unclassified
chr6B	661779256	661779858	TRITD6Bv1G213620.1	Transposable element protein, putative, Retrotrans_gag
chr6B	661783338	661783646	TRITD6Bv1G213630.1	Interleukin-2 receptor subunit alpha
chr6B	661825695	661826003	TRITD6Bv1G213640.1	Retrotransposon protein, putative, Ty3-gypsy subclass
chr6B	661848508	661848885	TRITD6Bv1G213650.1	AT hook motif-containing protein, putative, expressed
chr6B	661852522	661854901	TRITD6Bv1G213660.1	B3 domain-containing protein
chr6B	661897205	661897525	TRITD6Bv1G213670.1	Transposon protein, putative, CACTA, En/Spm sub-class
chr6B	661920643	661923737	TRITD6Bv1G213680.6	mRNA decapping protein 2
chr6B	661926220	661927107	TRITD6Bv1G213690.3	Photosystem II 10 kDa polypeptide family protein
chr6B	661953250	661953687	TRITD6Bv1G213700.1	NADH-quinone oxidoreductase subunit B
chr6B	661954719	661955183	TRITD6Bv1G213710.1	Retrovirus-related Pol polyprotein from transposon TNT 1-94
chr6B	661968986	661975966	TRITD6Bv1G213720.1	N-acetyltransferase
chr6B	661987440	661987736	TRITD6Bv1G213730.1	Retrotransposon protein, putative, Ty3-gypsy subclass
chr6B	662120742	662121110	TRITD6Bv1G213740.1	Retrovirus-related Pol polyprotein from transposon TNT 1-94
chr6B	662128511	662128906	TRITD6Bv1G213750.1	Reverse transcriptase
chr6B	662128912	662129223	TRITD6Bv1G213760.1	Retrovirus-related Pol polyprotein from transposon TNT 1-94
chr6B	662146026	662146442	TRITD6Bv1G213770.1	Retrovirus-related Pol polyprotein from transposon TNT 1-94
chr6B	662194880	662195275	TRITD6Bv1G213780.1	Reverse transcriptase
chr6B	662199738	662200073	TRITD6Bv1G213790.1	Transposon Ty3-I Gag-Pol polyprotein
chr6B	662201087	662201830	TRITD6Bv1G213800.1	3-hydroxyacyl-[acyl-carrier-protein] dehydratase FabZ
chr6B	662203124	662203450	TRITD6Bv1G213810.1	Adenylate kinase
chr6B	662230996	662231439	TRITD6Bv1G213820.1	Olfactory receptor 2T29
chr6B	662267734	662268201	TRITD6Bv1G213850.1	Histidine biosynthesis bifunctional protein HisIE
chr6B	662269379	662271566	TRITD6Bv1G213860.2	GATA transcription factor
chr6B	662272581	662272880	TRITD6Bv1G213870.1	Zinc finger protein 148
chr6B	662280507	662281928	TRITD6Bv1G213880.1	Retrotransposon protein, putative, unclassified
chr6B	662283089	662283922	TRITD6Bv1G213890.1	Retrotransposon protein, putative, unclassified
chr6B	662284434	662292058	TRITD6Bv1G213900.2	Kinase, putative
chr6B	662331641	662332048	TRITD6Bv1G213910.1	Retrotransposon protein, putative, Ty3-gypsy subclass
chr6B	662432449	662432760	TRITD6Bv1G213920.1	Retrovirus-related Pol polyprotein from transposon TNT 1-94
chr6B	662476872	662477306	TRITD6Bv1G213930.1	Transposon protein, putative, CACTA, En/Spm sub-class
chr6B	662485140	662488547	TRITD6Bv1G213940.2	Receptor-kinase, putative
chr6B	662493266	662496423	TRITD6Bv1G213950.1	Glycosyl transferase, family 2
chr6B	662536601	662539045	TRITD6Bv1G213960.1	2-oxoglutarate (2OG) and Fe(II)-dependent oxygenase superfamily protein
chr6B	662559619	662560185	TRITD6Bv1G213970.1	Agmatine coumaroyltransferase-2
chr6B	662561383	662565798	TRITD6Bv1G213980.4	Clathrin interactor EPSIN-like protein
chr6B	662562202	662562576	TRITD6Bv1G213990.1	guanylate-binding family protein
chr6B	662604903	662611942	TRITD6Bv1G214000.1	Zinc finger (C3HC4-type RING finger) family protein
chr6B	662611242	662612005	TRITD6Bv1G214010.1	Glycosyl hydrolase superfamily protein
chr6B	662630784	662631191	TRITD6Bv1G214020.1	Retrovirus-related Pol polyprotein from transposon TNT 1-94
chr6B	662640311	662640733	TRITD6Bv1G214030.1	60S ribosomal protein L35a-like protein
chr6B	662725002	662725352	TRITD6Bv1G214040.1	ARM repeat superfamily protein
chr6B	662820219	662824589	TRITD6Bv1G214050.2	arginine/glutamate-rich 1 protein
chr6B	662859540	662860127	TRITD6Bv1G214060.1	Zinc finger MYM-type protein 1
chr6B	662887106	662898138	TRITD6Bv1G214070.2	Linalool synthase, chloroplastic
chr6B	663011232	663012659	TRITD6Bv1G214080.2	Mediator of RNA polymerase II transcription subunit 26, putative
chr6B	663147161	663148112	TRITD6Bv1G214090.1	protein kinase family protein
chr6B	663179634	663180172	TRITD6Bv1G214100.1	Transcriptional factor B3 family protein
chr6B	663190912	663191244	TRITD6Bv1G214110.1	Aspartyl/glutamyl-tRNA(Asn/Gln) amidotransferase subunit B
chr6B	663192604	663192858	TRITD6Bv1G214120.1	LINE-1 reverse transcriptase like
chr6B	663192966	663193889	TRITD6Bv1G214130.1	Retrotransposon protein, putative, unclassified
chr6B	663196312	663197235	TRITD6Bv1G214140.1	Peroxidase
chr6B	663215173	663216117	TRITD6Bv1G214150.1	Kinase family protein
chr6B	663215491	663216075	TRITD6Bv1G214160.1	26S proteasome non-ATPase regulatory subunit 13-like protein B
chr6B	663221331	663223282	TRITD6Bv1G214170.1	Retrotransposon protein, putative, unclassified
chr6B	663222784	663223344	TRITD6Bv1G214170.2	embryonic flower 1 (EMF1)
chr6B	663225317	663226555	TRITD6Bv1G214180.1	ENTH/VHS family protein
chr6B	663229745	663231127	TRITD6Bv1G214190.2	Wall-associated receptor kinase 3
chr6B	663232125	663233300	TRITD6Bv1G214200.2	Receptor-like protein kinase
chr6B	663233572	663234669	TRITD6Bv1G214210.1	Wall-associated receptor kinase 3
chr6B	663236835	663237345	TRITD6Bv1G214220.1	serine/threonine-protein kinase AFC1
chr6B	663264884	663265300	TRITD6Bv1G214230.1	Genome polyprotein (Fragments)
chr6B	663264965	663267424	TRITD6Bv1G214240.3	Receptor-like protein kinase
chr6B	663280704	663281024	TRITD6Bv1G214260.1	Pol polyprotein
chr6B	663303046	663308538	TRITD6Bv1G214270.1	Macrophage migration inhibitory factor
chr6B	663303046	663308538	TRITD6Bv1G214270.2	Macrophage migration inhibitory factor
chr6B	663305667	663308538	TRITD6Bv1G214270.3	NAD(P)-binding Rossmann-fold superfamily protein
chr6B	663309323	663311880	TRITD6Bv1G214280.2	Receptor-like protein kinase
chr6B	663314858	663316853	TRITD6Bv1G214290.2	Laccase
chr6B	663386178	663387898	TRITD6Bv1G214300.1	Protein kinase family protein
chr6B	663414779	663415159	TRITD6Bv1G214310.1	Transposon Ty3-I Gag-Pol polyprotein
chr6B	663430440	663431033	TRITD6Bv1G214320.1	Endo-beta-1,3-glucanase
chr6B	663430913	663432742	TRITD6Bv1G214320.2	GroES-like zinc-binding alcohol dehydrogenase family protein
chr6B	663437706	663439041	TRITD6Bv1G214330.1	Receptor-like protein kinase
chr6B	663443181	663444085	TRITD6Bv1G214340.1	Retrovirus-related Pol polyprotein from transposon TNT 1-94
chr6B	663443392	663445370	TRITD6Bv1G214340.2	Retrovirus-related Pol polyprotein from transposon TNT 1-94
chr6B	663445824	663446462	TRITD6Bv1G214350.1	Retrotransposon protein, putative, Ty1-copia subclass
chr6B	663462771	663464255	TRITD6Bv1G214360.1	Retrovirus-related Pol polyprotein LINE-1
chr6B	663464661	663465236	TRITD6Bv1G214370.1	Craniofacial development protein 2
chr6B	663500616	663500954	TRITD6Bv1G214380.1	Heptaprenylglyceryl phosphate synthase
chr6B	663501737	663502269	TRITD6Bv1G214390.1	arginine-glutamic acid dipeptide repeat protein
chr6B	663501946	663502158	TRITD6Bv1G214390.2	glycosyl hydrolase family 10 protein / carbohydrate-binding domain-containing protein
chr6B	663607498	663607983	TRITD6Bv1G214400.1	Retrovirus-related Pol polyprotein from transposon TNT 1-94
chr6B	663613656	663614033	TRITD6Bv1G214410.1	KIF1-binding protein
chr6B	663636940	663639166	TRITD6Bv1G214420.1	Serine/threonine-protein phosphatase 7 long form-like protein
chr6B	663636940	663639931	TRITD6Bv1G214420.2	Serine/threonine-protein phosphatase 7 long form-like protein
chr6B	663652288	663653046	TRITD6Bv1G214430.1	LIGHT-DEPENDENT SHORT HYPOCOTYLS-like protein (DUF640)
chr6B	663680756	663681109	TRITD6Bv1G214450.1	General transcription factor IIF subunit 2
chr6B	663681549	663684491	TRITD6Bv1G214460.1	SAP-like protein BP-73
chr6B	663696923	663697813	TRITD6Bv1G214470.1	Retrovirus-related Pol polyprotein from transposon TNT 1-94
chr6B	663735514	663735834	TRITD6Bv1G214480.1	Translation initiation factor IF-2
chr6B	663792062	663792733	TRITD6Bv1G214490.1	Transposon Ty3-I Gag-Pol polyprotein
chr6B	663799221	663799529	TRITD6Bv1G214500.1	Accessory Sec system protein translocase subunit SecY2
chr6B	663857939	663860367	TRITD6Bv1G214510.1	Protein kinase family protein
chr6B	663935083	663935574	TRITD6Bv1G214520.1	Serine/threonine-protein kinase CBK1
chr6B	663937342	663937680	TRITD6Bv1G214530.1	Retrotransposon protein, putative, Ty3-gypsy subclass
chr6B	663957405	663959211	TRITD6Bv1G214540.1	Leucine-rich repeat protein kinase family protein
chr6B	663959218	663961184	TRITD6Bv1G214550.1	Signal recognition particle 54 kDa protein
chr6B	663960757	663961184	TRITD6Bv1G214550.2	Signal recognition particle 54 kDa protein
chr6B	664009420	664010042	TRITD6Bv1G214560.1	Peptidylprolyl isomerase
chr6B	664078552	664078911	TRITD6Bv1G214570.1	Protein kinase family protein
chr6B	664080572	664083141	TRITD6Bv1G214580.2	Protein kinase family protein
chr6B	664084956	664085273	TRITD6Bv1G214590.1	S-adenosyl-L-methionine-dependent methyltransferases superfamily protein
chr6B	664085008	664085820	TRITD6Bv1G214590.2	wall-associated receptor kinase-like protein
chr6B	664085469	664085858	TRITD6Bv1G214590.3	Wall-associated receptor kinase 3
chr6B	664097041	664097340	TRITD6Bv1G214600.1	Taxadiene 5-alpha hydroxylase
chr6B	664123306	664123608	TRITD6Bv1G214610.1	Ribonucleoside-diphosphate reductase large subunit-like protein
chr6B	664127415	664127813	TRITD6Bv1G214620.1	Maturase
chr6B	664127927	664128241	TRITD6Bv1G214630.1	Macrophage colony-stimulating factor 1 receptor
chr6B	664128640	664129425	TRITD6Bv1G214640.1	Transposon protein, putative, CACTA, En/Spm sub-class
chr6B	664129727	664130311	TRITD6Bv1G214650.1	Transposon protein, putative, CACTA, En/Spm sub-class
chr6B	664155411	664156733	TRITD6Bv1G214660.1	Protein kinase family protein
chr6B	664158766	664253480	TRITD6Bv1G214670.1	Wall-associated receptor kinase-like protein
chr6B	664185999	664186430	TRITD6Bv1G214680.1	Retrotransposon protein, putative, unclassified
chr6B	664189056	664189652	TRITD6Bv1G214690.1	Protein kinase family protein
chr6B	664250207	664250809	TRITD6Bv1G214700.1	Protein kinase family protein
chr6B	664257081	664257389	TRITD6Bv1G214710.1	Malectin/receptor-like protein kinase family protein
chr6B	664263787	664264266	TRITD6Bv1G214720.1	Retrotransposon protein, putative, unclassified
chr6B	664318348	664318734	TRITD6Bv1G214730.1	Retrovirus-related Pol polyprotein from transposon TNT 1-94
chr6B	664325482	664328629	TRITD6Bv1G214740.1	Survival motor neuron containing protein
chr6B	664328879	664332229	TRITD6Bv1G214750.2	ABC(ATP-binding) family transporter
chr6B	664362086	664362781	TRITD6Bv1G214760.1	Retrovirus-related Pol polyprotein from transposon 17.6
chr6B	664385748	664386143	TRITD6Bv1G214770.1	Retrotransposon protein, putative, unclassified
chr6B	664409655	664412910	TRITD6Bv1G214780.4	Protein kinase family protein
chr6B	664413897	664418077	TRITD6Bv1G214790.2	Diphthine--ammonia ligase
chr6B	664419358	664423074	TRITD6Bv1G214800.1	TBC1 domain family member
chr6B	664440235	664440885	TRITD6Bv1G214810.1	Pol polyprotein
chr6B	664451958	664452260	TRITD6Bv1G214820.1	NAD(P)H dehydrogenase (quinone)s
chr6B	664472766	664473068	TRITD6Bv1G214830.1	Pol polyprotein
chr6B	664479513	664480001	TRITD6Bv1G214840.1	UvrABC system protein B
chr6B	664537338	664537748	TRITD6Bv1G214850.1	Transposon protein, putative, CACTA, En/Spm sub-class
chr6B	664584248	664586259	TRITD6Bv1G214860.1	Cytochrome P450
chr6B	664590113	664591910	TRITD6Bv1G214870.1	CBS domain protein (DUF21)
chr6B	664608550	664608861	TRITD6Bv1G214880.1	Disease resistance protein (TIR-NBS-LRR class)
chr6B	664631033	664631464	TRITD6Bv1G214890.1	Transposon protein, putative, CACTA, En/Spm sub-class
chr6B	664634242	664635427	TRITD6Bv1G214900.1	Adenylate kinase
chr6B	664643504	664643836	TRITD6Bv1G214910.1	LINE-1 reverse transcriptase like
chr6B	664654708	664655733	TRITD6Bv1G214920.1	Serum albumin SDS-1
chr6B	664678730	664679074	TRITD6Bv1G214930.1	RNA-directed DNA polymerase (reverse transcriptase)-related family protein
chr6B	664691699	664694356	TRITD6Bv1G214940.1	transcription factor jumonji (jmjC) domain-containing protein
chr6B	664720068	664721938	TRITD6Bv1G214950.1	NAC domain protein,
chr6B	664739730	664740062	TRITD6Bv1G214960.1	Male-specific lethal 3 homolog
chr6B	664744516	664744893	TRITD6Bv1G214970.1	Transposon protein, putative, CACTA, En/Spm sub-class
chr6B	664778361	664780353	TRITD6Bv1G214980.1	NAC domain protein,
chr6B	664892832	664894187	TRITD6Bv1G214990.1	DNA-directed RNA polymerase III subunit RPC5
chr6B	664892832	664894187	TRITD6Bv1G214990.2	DNA-directed RNA polymerase III subunit RPC5
chr6B	664901997	664902395	TRITD6Bv1G215000.1	Transposon protein, putative, CACTA, En/Spm sub-class
chr6B	665049346	665057477	TRITD6Bv1G215050.2	Serine/arginine repetitive matrix protein 1
chr6B	665066605	665066949	TRITD6Bv1G215060.1	Transposon protein, putative, CACTA, En/Spm sub-class
chr6B	665067862	665068398	TRITD6Bv1G215070.1	Transposon protein, putative, CACTA, En/Spm sub-class
chr6B	665074414	665074816	TRITD6Bv1G215080.1	Disease resistance protein (TIR-NBS-LRR class)
chr6B	665074877	665077245	TRITD6Bv1G215090.1	Translation initiation factor IF-2
chr6B	665095033	665095332	TRITD6Bv1G215100.1	60S ribosomal protein L9
chr6B	665144554	665146486	TRITD6Bv1G215110.2	Cytochrome P450
chr6B	665156763	665157465	TRITD6Bv1G215120.1	MAP kinase/ ERK kinase 1
chr6B	665157825	665158352	TRITD6Bv1G215130.1	EBNA-1-like protein
chr6B	665161629	665162243	TRITD6Bv1G215140.1	Protein ROOT HAIR DEFECTIVE 3 homolog
chr6B	665170444	665170722	TRITD6Bv1G215180.1	Protein FAR1-RELATED SEQUENCE 5
chr6B	665178242	665182563	TRITD6Bv1G215190.1	Protein kinase
chr6B	665195321	665195668	TRITD6Bv1G215200.1	Retrotransposon protein, putative, Ty3-gypsy subclass
chr6B	665200056	665200622	TRITD6Bv1G215210.1	Ubiquitin carboxyl-terminal hydrolase 9
chr6B	665204432	665204848	TRITD6Bv1G215220.1	Transposase
chr6B	665218000	665221436	TRITD6Bv1G215250.1	Protein kinase
chr6B	665269540	665275149	TRITD6Bv1G215260.1	receptor kinase 1
chr6B	665286081	665288750	TRITD6Bv1G215270.1	Retrovirus-related Pol polyprotein from transposon TNT 1-94
chr6B	665370078	665375404	TRITD6Bv1G215280.3	Kinesin like protein
chr6B	665386266	665386726	TRITD6Bv1G215290.1	EMBRYO SURROUNDING FACTOR 1.2
chr6B	665388756	665389338	TRITD6Bv1G215300.1	Kinesin like protein
chr6B	665425370	665425714	TRITD6Bv1G215310.1	RNA-binding (RRM/RBD/RNP motifs) family protein
chr6B	665472694	665473044	TRITD6Bv1G215320.1	Retrotransposon protein, putative, Ty3-gypsy subclass
chr6B	665483298	665484941	TRITD6Bv1G215330.1	E3 ubiquitin-protein ligase SINA-like 10
chr6B	665497768	665498324	TRITD6Bv1G215360.1	Acetyl-coenzyme A carboxylase carboxyl transferase subunit beta, chloroplastic
chr6B	665497886	665498223	TRITD6Bv1G215360.2	alpha dioxygenase
chr6B	665534473	665535153	TRITD6Bv1G215370.1	Retrotransposon protein, putative, Ty3-gypsy subclass
chr6B	665605165	665605647	TRITD6Bv1G215410.1	Dynamin-3
chr6B	665634847	665636358	TRITD6Bv1G215420.1	Sentrin-specific protease 2
chr6B	665634847	665636685	TRITD6Bv1G215420.2	Ubiquitin-like-specific protease ESD4-like protein
chr6B	665634847	665641512	TRITD6Bv1G215420.3	DNA repair metallo-beta-lactamase
chr6B	665635337	665636358	TRITD6Bv1G215420.4	Ubiquitin-like-specific protease ESD4
chr6B	665636555	665641512	TRITD6Bv1G215420.5	DNA cross-link repair family protein
chr6B	665643934	665644341	TRITD6Bv1G215430.1	Transposon protein, putative, Pong sub-class
chr6B	665682667	665682999	TRITD6Bv1G215440.1	Protein kinase family protein
chr6B	665729563	665730084	TRITD6Bv1G215450.1	Transcriptional coactivator YAP1-A
chr6B	665737732	665738121	TRITD6Bv1G215460.1	Retrotransposon protein, putative, Ty3-gypsy subclass
chr6B	665935137	665935502	TRITD6Bv1G215510.1	lateral signaling target-like protein (Protein of unknown function, DUF593)
chr6B	665935417	665935857	TRITD6Bv1G215510.2	Retrovirus-related Pol polyprotein from transposon TNT 1-94
chr6B	665961771	665962249	TRITD6Bv1G215520.1	Actin-related protein 7
chr6B	666032167	666035663	TRITD6Bv1G215530.1	Ankyrin repeat protein-like
chr6B	666044554	666044904	TRITD6Bv1G215540.1	Activin receptor type-1C
chr6B	666051747	666052100	TRITD6Bv1G215550.1	Retrotransposon protein, putative, unclassified
chr6B	666072890	666073567	TRITD6Bv1G215560.1	Retrovirus-related Pol polyprotein from transposon TNT 1-94
chr6B	666128865	666131210	TRITD6Bv1G215570.1	N-acetylgalactosamine kinase
chr6B	666159850	666160334	TRITD6Bv1G215580.1	Protein Ycf2
chr6B	666287845	666288326	TRITD6Bv1G215590.1	AP-5 complex subunit beta-like protein
chr6B	666317614	666318453	TRITD6Bv1G215600.1	LINE-1 reverse transcriptase like
chr6B	666318457	666318798	TRITD6Bv1G215610.1	RNA-directed DNA polymerase (Reverse transcriptase)
chr6B	666318457	666319400	TRITD6Bv1G215610.2	Retrotransposon protein, putative, unclassified
chr6B	666318457	666319998	TRITD6Bv1G215610.3	Polynucleotidyl transferase, ribonuclease H-like superfamily protein
chr6B	666413193	666415066	TRITD6Bv1G215640.1	Alpha/beta-Hydrolases superfamily protein isoform 1
chr6B	666427575	666428240	TRITD6Bv1G215650.1	Phosphate transporter PHO1
chr6B	666427936	666430003	TRITD6Bv1G215650.2	Phosphate transporter PHO1 1
chr6B	666430860	666431761	TRITD6Bv1G215670.1	Retrovirus-related Pol polyprotein from transposon TNT 1-94
chr6B	666439132	666441997	TRITD6Bv1G215680.1	Phosphate transporter PHO1
chr6B	666442052	666442650	TRITD6Bv1G215690.1	Phosphate transporter PHO1
chr6B	666542108	666542395	TRITD6Bv1G215700.1	B3 domain-containing protein family
chr6B	666551944	666560615	TRITD6Bv1G215710.1	Peptide methionine sulfoxide reductase MsrA
chr6B	666557719	666561830	TRITD6Bv1G215660.6	Phosphate transporter PHO1-like protein
chr6B	666559252	666560510	TRITD6Bv1G215710.2	p-loop containing nucleoside triphosphate hydrolases superfamily protein
chr6B	666588656	666589268	TRITD6Bv1G215720.1	50S ribosomal protein L5
chr6B	666669421	666672349	TRITD6Bv1G215750.2	COBRA-like protein
chr6B	666713097	666713624	TRITD6Bv1G215760.1	Retrotransposon protein, putative, unclassified
chr6B	666727856	666728449	TRITD6Bv1G215770.1	Retrotransposon protein, putative, Ty3-gypsy subclass
chr6B	666738701	666739063	TRITD6Bv1G215780.1	Clathrin heavy chain linker domain-containing protein 1
chr6B	666843598	666848186	TRITD6Bv1G215830.7	Phosphate transporter PHO1-like protein
chr6B	666863835	666864092	TRITD6Bv1G215840.1	Diacylglycerol kinase
chr6B	666907043	666907759	TRITD6Bv1G215850.1	Retrovirus-related Pol polyprotein from transposon TNT 1-94
chr6B	666951526	666951825	TRITD6Bv1G215860.1	Retrotransposon protein, putative, unclassified
chr6B	666962307	666962735	TRITD6Bv1G215870.1	Retrotransposon protein, putative, Ty3-gypsy subclass
chr6B	667034645	667035109	TRITD6Bv1G215890.1	Retrovirus-related Pol polyprotein from transposon TNT 1-94
chr6B	667056988	667057683	TRITD6Bv1G215900.1	Pol polyprotein
chr6B	667060431	667061267	TRITD6Bv1G215910.1	Transposable element protein, putative, Retrotrans_gag
chr6B	667065571	667070726	TRITD6Bv1G215920.1	Cytosine-specific methyltransferase
chr6B	667071724	667076957	TRITD6Bv1G215930.2	Zinc finger, PHD-finger
chr6B	667077075	667077491	TRITD6Bv1G215940.1	DNA (Cytosine-5)-methyltransferase 1
chr6B	667083097	667089041	TRITD6Bv1G215950.1	NBS-LRR disease resistance protein
chr6B	667089214	667089963	TRITD6Bv1G215960.1	Disease resistance protein (TIR-NBS-LRR class), putative
chr6B	667089214	667090214	TRITD6Bv1G215960.2	Disease resistance protein (TIR-NBS-LRR class), putative
chr6B	667089214	667090236	TRITD6Bv1G215960.3	Disease resistance protein (TIR-NBS-LRR class), putative
chr6B	667089214	667090739	TRITD6Bv1G215960.4	Disease resistance protein (TIR-NBS-LRR class), putative
chr6B	667135416	667135771	TRITD6Bv1G215970.1	ERD (early-responsive to dehydration stress) family protein
chr6B	667136269	667137018	TRITD6Bv1G215980.1	LINE-1 reverse transcriptase like
chr6B	667137025	667137786	TRITD6Bv1G215990.1	Retrotransposon protein, putative, unclassified
chr6B	667144542	667144970	TRITD6Bv1G216000.1	Melatonin-related receptor
chr6B	667229180	667229572	TRITD6Bv1G216070.1	Cyst nematode resistance protein-like
chr6B	667230897	667232048	TRITD6Bv1G216080.1	P-loop containing nucleoside triphosphate hydrolases superfamily protein
chr6B	667231058	667231381	TRITD6Bv1G216080.2	BPI fold-containing family B member 2
chr6B	667243238	667244719	TRITD6Bv1G216090.1	Octicosapeptide/Phox/Bem1p domain-containing protein
chr6B	667302411	667302773	TRITD6Bv1G216100.1	Retrovirus-related Pol polyprotein from transposon TNT 1-94
chr6B	667314066	667315690	TRITD6Bv1G216110.1	Cytochrome P450
chr6B	667317610	667317924	TRITD6Bv1G216120.1	GRF zinc finger family protein
chr6B	667317610	667318289	TRITD6Bv1G216120.2	DNA topoisomerase
chr6B	667317949	667318350	TRITD6Bv1G216130.1	DNA translocase FtsK
chr6B	667320067	667320483	TRITD6Bv1G216140.1	Bifunctional inhibitor/lipid-transfer protein/seed storage 2S albumin superfamily protein
chr6B	667322716	667323306	TRITD6Bv1G216150.1	RNA binding (RRM/RBD/RNP motifs) family protein
chr6B	667360440	667360931	TRITD6Bv1G216160.1	Retrotransposon protein, putative, Ty3-gypsy subclass
chr6B	667396293	667396790	TRITD6Bv1G216170.1	60 kDa chaperonin
chr6B	667416977	667417291	TRITD6Bv1G216180.1	Retrovirus-related Pol polyprotein from transposon TNT 1-94
chr6B	667457584	667460395	TRITD6Bv1G216190.1	Receptor-like kinase
chr6B	667597708	667598676	TRITD6Bv1G216240.1	Chitin synthase 4
chr6B	667598393	667611249	TRITD6Bv1G216250.1	Cytochrome P450
chr6B	667615639	667617034	TRITD6Bv1G216260.1	Cinnamoyl CoA reductase
chr6B	667659319	667659651	TRITD6Bv1G216270.1	Transposon protein, putative, CACTA, En/Spm sub-class
chr6B	667698883	667699317	TRITD6Bv1G216280.1	Retrovirus-related Pol polyprotein from transposon TNT 1-94
chr6B	667704670	667705209	TRITD6Bv1G216290.1	Retrotransposon protein, putative, unclassified
[truncated: 776 more rows]

## Sheet: QLrusw7BL
Annotated genes within the leaf rust resistance QTL interval of Qlr.usw-7BL in Arnacoris
Chromosome	Start position	End position	Transcript ID	Annotation
chr7B	719723538	719726089	TRITD7Bv1G233320.3	Tetratricopeptide repeat-like superfamily protein, putative isoform 1
chr7B	719837934	719839652	TRITD7Bv1G233370.1	Integral membrane protein 2B
chr7B	719842861	719843292	TRITD7Bv1G233390.1	Signal recognition particle 54 kDa protein
chr7B	719842874	719843464	TRITD7Bv1G233390.2	Proline-rich spliceosome-associated (PSP) family protein / zinc knuckle (CCHC-type) family protein
chr7B	719844112	719848157	TRITD7Bv1G233400.4	Phosphatidylinositol-4-phosphate 5-kinase family protein
chr7B	719848262	719848600	TRITD7Bv1G233410.1	sodium hydrogen exchanger 4
chr7B	719848673	719849008	TRITD7Bv1G233420.1	DWNN domain, a CCHC-type zinc finger
chr7B	719857781	719858311	TRITD7Bv1G233430.1	ATP-dependent protease subunit HslV
chr7B	719857781	719858663	TRITD7Bv1G233430.2	receptor-like kinase in flowers 1
chr7B	719857781	719858663	TRITD7Bv1G233430.3	receptor-like kinase in flowers 1
chr7B	719863055	719863372	TRITD7Bv1G233440.1	Protein PAM68, chloroplastic
chr7B	719867963	719868391	TRITD7Bv1G233450.1	Retrotransposon protein, putative, unclassified
chr7B	719869987	719870640	TRITD7Bv1G233470.1	Retrotransposon protein, putative, LINE subclass
chr7B	719872278	719874863	TRITD7Bv1G233480.1	RNA-binding KH domain-containing protein
chr7B	719894442	719894840	TRITD7Bv1G233490.1	DNA mismatch repair protein MutS
chr7B	719897229	719901710	TRITD7Bv1G233500.1	RING/FYVE/PHD zinc finger protein
chr7B	719907551	719908651	TRITD7Bv1G233510.3	RNA-binding family protein
chr7B	719909003	719909329	TRITD7Bv1G233520.1	anaphase-promoting complex subunit 8
chr7B	719917442	719918479	TRITD7Bv1G233530.1	Ribosomal protein L11 methyltransferase
chr7B	719918222	719919599	TRITD7Bv1G233540.1	Hexosyltransferase
chr7B	719928652	719928954	TRITD7Bv1G233550.1	Retrovirus-related Pol polyprotein from transposon TNT 1-94
chr7B	719977779	719983682	TRITD7Bv1G233560.2	ABC transporter G family member
chr7B	719997656	719999089	TRITD7Bv1G233570.1	zinc finger MYM-type-like protein
chr7B	719999434	719999916	TRITD7Bv1G233580.1	Zinc finger MYM-type protein 1
chr7B	720001001	720001465	TRITD7Bv1G233590.1	Protein FAR1-RELATED SEQUENCE 5
chr7B	720015993	720018066	TRITD7Bv1G233600.1	Werner Syndrome-like exonuclease
chr7B	720020981	720021595	TRITD7Bv1G233610.1	F-box-like/WD repeat-containing protein TBL1XR1
chr7B	720042611	720044243	TRITD7Bv1G233620.1	Serine/threonine-protein phosphatase 7 long form like
chr7B	720044709	720045731	TRITD7Bv1G233630.1	Ubiquitin-like-specific protease ESD4
chr7B	720051747	720054697	TRITD7Bv1G233640.1	Mediator of RNA polymerase II transcription subunit 15a
chr7B	720076256	720076669	TRITD7Bv1G233650.1	Transposon Ty3-I Gag-Pol polyprotein
chr7B	720086536	720091981	TRITD7Bv1G233660.1	NBS-LRR-like resistance protein
chr7B	720100605	720101372	TRITD7Bv1G233670.1	NBS-LRR-like resistance protein
chr7B	720111526	720113664	TRITD7Bv1G233680.2	NBS-LRR-like resistance protein
chr7B	720113668	720114174	TRITD7Bv1G233690.1	NBS-LRR-like resistance protein
chr7B	720114507	720116090	TRITD7Bv1G233700.1	NBS-LRR-like resistance protein
chr7B	720135988	720138047	TRITD7Bv1G233710.3	Disease resistance protein (NBS-LRR class) family
chr7B	720193198	720193593	TRITD7Bv1G233730.1	Leucine-rich repeat receptor-like protein kinase family protein
chr7B	720198178	720198620	TRITD7Bv1G233740.1	Clathrin heavy chain linker domain-containing protein 1
chr7B	720220679	720221038	TRITD7Bv1G233750.1	importin alpha isoform 4
chr7B	720230024	720231792	TRITD7Bv1G233760.2	Chloroplast protein
chr7B	720234397	720237808	TRITD7Bv1G233770.4	Signal peptide peptidase-like protein
chr7B	720320637	720321044	TRITD7Bv1G233780.1	1-deoxy-D-xylulose-5-phosphate synthase
chr7B	720399505	720400067	TRITD7Bv1G233790.1	Biotin synthase
chr7B	720421507	720424221	TRITD7Bv1G233800.1	Cysteine protease
chr7B	720427517	720432573	TRITD7Bv1G233810.1	RNA-binding protein Nova
chr7B	720448093	720449801	TRITD7Bv1G233820.1	NAC domain protein,
chr7B	720451032	720479651	TRITD7Bv1G233830.2	NAC domain-containing protein
chr7B	720470941	720471225	TRITD7Bv1G233840.1	50S ribosomal protein L32
chr7B	720499798	720500082	TRITD7Bv1G233850.1	50S ribosomal protein L32
chr7B	720545146	720546447	TRITD7Bv1G233860.1	Dirigent protein
chr7B	720552592	720553562	TRITD7Bv1G233870.1	Protein kinase
chr7B	720560315	720560593	TRITD7Bv1G233880.1	zinc finger MYM-type-like protein
chr7B	720579897	720580558	TRITD7Bv1G233890.1	disease resistance protein (TIR-NBS-LRR class)
chr7B	720579976	720580558	TRITD7Bv1G233890.2	disease resistance protein (TIR-NBS-LRR class)
chr7B	720580031	720580558	TRITD7Bv1G233890.3	Photosystem II CP43 reaction center protein
chr7B	720620770	720624554	TRITD7Bv1G233900.1	Disease resistance protein (TIR-NBS-LRR class) family
chr7B	720641658	720643391	TRITD7Bv1G233910.1	disease resistance protein (TIR-NBS-LRR class) family
chr7B	720644202	720644630	TRITD7Bv1G233920.1	Disease resistance protein RPM1
chr7B	720646391	720650603	TRITD7Bv1G233930.1	Disease resistance protein
chr7B	720812124	720812829	TRITD7Bv1G233940.1	50S ribosomal protein L18
chr7B	720831092	720832414	TRITD7Bv1G233950.1	Transposon protein, putative, CACTA, En/Spm sub-class
chr7B	720831822	720832013	TRITD7Bv1G233950.4	Anaphase-promoting complex subunit 7
chr7B	720838075	720841735	TRITD7Bv1G233960.1	Guanine nucleotide-binding protein subunit beta-like protein
chr7B	720861614	720865046	TRITD7Bv1G233970.1	disease resistance family protein / LRR family protein
chr7B	720929739	720930077	TRITD7Bv1G233980.1	NBS-LRR-like resistance protein
chr7B	720932478	720993097	TRITD7Bv1G233990.1	Harbinger transposase-derived nuclease
chr7B	720943290	720944508	TRITD7Bv1G234000.2	Receptor-like protein kinase
chr7B	720946757	720949954	TRITD7Bv1G234010.1	Rp1-like protein
chr7B	720965330	720966438	TRITD7Bv1G234020.1	F-box domain containing protein, expressed
chr7B	721024418	721028067	TRITD7Bv1G234030.1	DNA polymerase epsilon catalytic subunit
chr7B	721068759	721069787	TRITD7Bv1G234040.2	Disease resistance protein (TIR-NBS-LRR class) family
chr7B	721072055	721074105	TRITD7Bv1G234060.1	NBS-LRR-like resistance protein
chr7B	721078462	721082280	TRITD7Bv1G234070.1	Rp1-like protein
chr7B	721128495	721128845	TRITD7Bv1G234080.1	Photosystem II reaction center protein H
chr7B	721157376	721158419	TRITD7Bv1G234090.1	Transposon protein, putative, CACTA, En/Spm sub-class
chr7B	721162604	721164654	TRITD7Bv1G234120.1	Disease resistance protein (TIR-NBS-LRR class) family
chr7B	721192699	721205780	TRITD7Bv1G234130.1	NBS-LRR-like resistance protein
chr7B	721206098	721206979	TRITD7Bv1G234140.1	Leucine-rich repeat (LRR) family protein
chr7B	721206943	721207749	TRITD7Bv1G234140.2	Rp1-like protein
chr7B	721207868	721208524	TRITD7Bv1G234150.1	Rp1-like protein
chr7B	721223037	721223465	TRITD7Bv1G234160.1	Apoptosis regulatory protein Siva
chr7B	721244715	721245245	TRITD7Bv1G234170.1	Chromosome partition protein MukB
chr7B	721277700	721281133	TRITD7Bv1G234180.2	disease resistance family protein / LRR family protein
chr7B	721326655	721327761	TRITD7Bv1G234190.1	Rp1-like protein
chr7B	721329403	721330485	TRITD7Bv1G234200.1	NBS-LRR-like resistance protein
chr7B	721355503	721356673	TRITD7Bv1G234210.1	Protein FAR1-RELATED SEQUENCE 5
chr7B	721373847	721374290	TRITD7Bv1G234240.1	NBS-LRR disease resistance protein
chr7B	721395825	721396259	TRITD7Bv1G234250.1	Harbinger transposase-derived nuclease
chr7B	721395825	721396259	TRITD7Bv1G234250.2	Harbinger transposase-derived nuclease
chr7B	721427545	721429901	TRITD7Bv1G234260.1	NBS-LRR-like resistance protein
chr7B	721429985	721432892	TRITD7Bv1G234050.4	NBS-LRR-like resistance protein
chr7B	721446244	721447068	TRITD7Bv1G234270.1	Retrovirus-related Pol polyprotein from transposon TNT 1-94
chr7B	721464782	721469825	TRITD7Bv1G233720.12	NBS-LRR-like resistance protein
chr7B	721475633	721477732	TRITD7Bv1G234280.1	Leucine-rich repeat receptor-like protein kinase family protein
chr7B	721538116	721539504	TRITD7Bv1G234290.1	disease resistance protein (TIR-NBS-LRR class)
chr7B	721539904	721541763	TRITD7Bv1G234300.1	Rp1-like protein
chr7B	721554302	721555185	TRITD7Bv1G234310.1	protein kinase family protein
chr7B	721554347	721568165	TRITD7Bv1G234310.2	Diacylglycerol kinase
chr7B	721555220	721565737	TRITD7Bv1G234310.3	Diacylglycerol kinase
chr7B	721676359	721678812	TRITD7Bv1G234320.1	Disease resistance protein (TIR-NBS-LRR class) family
chr7B	721678906	721679649	TRITD7Bv1G234330.1	NBS-LRR-like resistance protein
chr7B	721679653	721681988	TRITD7Bv1G234340.1	Disease resistance protein (NBS-LRR class) family
chr7B	721686716	721689959	TRITD7Bv1G234350.1	NBS-LRR-like resistance protein
chr7B	721703418	721704353	TRITD7Bv1G234360.1	LINE-1 reverse transcriptase like
chr7B	721723207	721723503	TRITD7Bv1G234380.1	Disease resistance protein RGA2
chr7B	721738723	721753440	TRITD7Bv1G234390.5	Lysine-specific demethylase
chr7B	721747500	721748468	TRITD7Bv1G234400.1	Nucleic acid-binding, OB-fold-like protein
chr7B	721747678	721748468	TRITD7Bv1G234400.2	1-deoxy-D-xylulose 5-phosphate synthase 3
